# Supplementary material for: Multi-pesticide residue screening, identification, and quantification analysis in various fruits and vegetables by UHPLC-Q Exactive HRMS
Source: Royal Society of Chemistry journal article supplement (doi:10.1039/d4ay00563e), 2024-01-01
Supplement: d4ay00563e1.pdf [file d4ay00563e1.pdf]

## Electronic Supplementary Information

### Multi-pesticides residues screening, identification, and quantification analysis in diversified fruits and vegetables by UHPLC-Q Exactive HRMS

*Fengyi Wang<sup>a,b</sup>, Ying Jiao<sup>a,b</sup>, Shiting Qiu<sup>a,b</sup>, Mei Han<sup>a,b\*</sup>, Xue Hou<sup>a,b\*</sup>, Guangyun He, and  
Shudi Qin<sup>a,b</sup>*

*a Institute of Quality Standard and Testing Technology For Agro-products of Sichuan  
Academy of Agricultural Sciences, Chengdu 610066, China.*

*b Laboratory of Quality and Safety Risk Assessment for Agro-products (Chengdu),  
Ministry of Agriculture, Chengdu, 610066, China*

*\* Corresponding authors: SCNKYHM@163.com (M. Han); caitian@swu.edu.cn (X. Hou).*

**Table S1** Pesticides high-resolution MS database.

| ID | Compound Name <sup>a</sup> | CAS NO.     | Chemical Formula | Exact Mass | Adduct | RT/min | Fragment 1 | Fragment 2 | Fragment 3 | Fragment 4 | Fragment 5 |
|----|----------------------------|-------------|------------------|------------|--------|--------|------------|------------|------------|------------|------------|
| 1  | 1-naphthylacetic acid      | 86-87-3     | C12H10O2         | 209.0573   | M+Na   | 7.31   | 182.97159  | 152.06145  | 131.08498  | 79.05479   | 67.05499   |
| 2  | 2,4-D                      | 94-75-7     | C8H6Cl2O3        | 218.96212  | M-H    | 7.39   | 160.95613  | 124.9795   | 89.00313   | 70.98317   | 77.00299   |
| 3  | Acephate                   | 30560-19-1  | C4H10NO3P<br>S   | 184.01918  | M+H    | 2.92   | 142.99211  | 112.99934  | 112.0154   | 128.97644  | 64.97861   |
| 4  | Acetamidiprid              | 135410-20-7 | C10H11ClN4       | 223.0745   | M+H    | 4.31   | 126.01003  | 144.02068  | 223.07399  | 187.09663  | 181.05202  |
| 5  | Acetochlor                 | 34256-82-1  | C14H20ClNO2      | 270.12553  | M+H    | 9.86   | 148.11189  | 133.08847  | 50.04939   | 130.06505  | 224.08331  |
| 6  | Acifluorfen                | 50594-66-6  | C14H7ClF3NO5     | 359.98921  | M-H    | 9.77   | 194.98271  | 174.97697  | 222.02975  | 137.0117   | 69.03459   |
| 7  | Alachlor                   | 15972-60-8  | C14H20ClNO2      | 270.12553  | M+H    | 9.86   | 162.12750  | 132.0807   | 147.10414  | 90.01049   | 238.09918  |
| 8  | Albendazole                | 54965-21-8  | C12H15N3O2S      | 266.09577  | M+H    | 8.43   | 234.06923  | 191.0146   | 159.0426   | 192.0224   | 266.09546  |
| 9  | Aldicarb sulfoxide         | 1646-87-3   | C7H14N2O3S       | 207.07979  | M+H    | 3.12   | 89.04156   | 69.05711   | 65.00548   | 68.04932   | 76.03901   |
| 10 | Aldicarb                   | 116-06-3    | C7H14N2O2S       | 191.08487  | M+H    | 5.09   | 89.04195   | 116.05285  | 70.06513   |            |            |
| 11 | Aldicarb sulfone           | 1646-88-4   | C7H14N2O4S       | 223.0747   | M+H    | 3.27   | 86.05969   | 62.98986   | 59.04917   | 81.00017   | 76.03901   |
| 12 | Ametoctradin               | 865318-97-4 | C15H25N5         | 276.21827  | M+H    | 11.94  | 276.21799  | 176.09311  | 149.08212  | 177.10097  | 123.06646  |
| 13 | Ametryn                    | 834-12-8    | C9H17N5S         | 228.12774  | M+H    | 7.7    | 68.02416   | 186.08006  | 228.12671  | 96.05521   | 74.00558   |
| 14 | Amidosulfuron              | 120923-37-7 | C9H15N5O7S2      | 370.04857  | M+H    | 7.2    | 236.033    | 139.03752  | 69.00844   | 261.02847  | 279.03891  |
| 15 | Aminocyclopyrachlor        | 858956-08-8 | C8H8ClN3O2       | 214.03778  | M+H    | 3.01   | 68.04949   | 168.03203  | 100.99017  | 66.02144   | 214.0378   |
| 16 | Aminopyralid               | 150114-71-9 | C6H4Cl2N2O2      | 206.97226  | M+H    | 3.1    | 178.97733  | 133.95586  | 206.97217  | 160.96672  | 125.99793  |
| 17 | Amisulbrom                 | 348635-87-0 | C13H13BrFN5O4S2  | 487.94686  | M+Na   | 12.61  | 245.98347  | 226.93575  | 172.67561  | 51.82406   | 188.98752  |
| 18 | Amitraz                    | 33089-61-1  | C19H23N3         | 294.19647  | M+H    | 14.01  | 163.12297  | 122.09643  | 132.08078  | 107.07295  |            |
| 19 | Amitrole                   | 61-82-5     | C2H4N4           | 107.03282  | M+Na   | 1.82   | 70.1074    | 79.05507   | 91.05473   | 62.99071   | 80.05016   |
| 20 | Anilazine                  | 101-05-3    | C9H5Cl3N4        | 272.9507   | M-H    | 9.36   | 153.02158  | 274.96515  | 61.97952   | 178.01686  | 118.05264  |
| 21 | Anilofos                   | 64249-01-0  | C13H19ClNO3PS2   | 368.03053  | M+H    | 10.98  | 142.9921   | 170.96909  | 198.96385  | 78.99402   | 93.00961   |
| 22 | Atrazine                   | 1912-24-9   | C8H14ClN5        | 216.10105  | M+H    | 7.41   | 174.05336  | 68.02414   | 104.0005   | 79.00541   | 96.05519   |
| 23 | Avermectins                | 71751-41-2  | C48H72O14        | 895.48143  | M+Na   | 15.1   | 521.28888  | 497.25253  | 455.2412   | 449.25021  | 327.19235  |
| 24 | Azadirachtin               | 11141-17-6  | C30H36O9         | 541.24321  | M+H    | 10.4   | 83.04914   | 161.05971  | 567.18609  | 585.19665  | 525.17552  |
| 25 | Azinphosmethyl             | 86-50-0     | C10H12N3O3PS2    | 318.01305  | M+H    | 8.44   | 136.03933  | 168.06549  | 142.99266  | 132.04439  | 182.08124  |
| 26 | Azocyclotri                | 41083-      | C20H25N3S2       | 437.18     | M+     | 16.1   | 201.20081  | 154.12155  | 90.0762    | 81.06056   | 171.1484   |

| n                      | 11-8               | 475                  | 7                  |               |           |       |           |           |               |               |               |
|------------------------|--------------------|----------------------|--------------------|---------------|-----------|-------|-----------|-----------|---------------|---------------|---------------|
| <i>Table S1 contd.</i> |                    |                      |                    |               |           |       |           |           |               |               |               |
| 27                     | Azoxystrobin       | 13186<br>0-33-8      | C22H17N3O<br>5     | 404.12<br>41  | M+H       | 8.87  | 156.04372 | 134.05943 | 129.044<br>2  | 133.0517<br>6 | 145.0515      |
| 28                     | Benalaxyl          | 71626-<br>11-4       | C20H23NO3          | 326.17<br>507 | M+H       | 10.91 | 91.05387  | 148.11145 | 121.088<br>13 | 208.1323<br>2 | 106.0647      |
| 29                     | Benazolin          | 25059-<br>80-7       | C9H6ClNO3<br>S     | 243.98<br>297 | M+H       | 5.81  | 122.11137 | 180.63597 | 136.053<br>99 | 174.0574<br>2 |               |
| 30                     | Benfurcarb         | 82560-<br>54-1       | C20H30N2O<br>5S    | 411.19<br>482 | M+H       | 12.32 | 195.04723 | 162.06749 | 252.068<br>5  | 158.1176<br>1 | 190.0896      |
| 31                     | Bensulfuron-methyl | 83055-<br>99-6       | C16H18N4O<br>7S    | 411.09<br>69  | M+H       | 8.67  | 149.05914 | 182.05635 | 119.048<br>65 | 91.05384      | 83.02364      |
| 32                     | Bentazone          | 25057-<br>89-0       | C10H12N2O<br>3S    | 263.04<br>608 | M+Na      | 5.66  | 91.05408  | 211.66307 | 135.322<br>86 | 243.3347<br>5 | 190.3686<br>8 |
| 33                     | Benziothiazolinone | 2634-<br>33-5        | C7H5NOS            | 152.01<br>646 | M+H       | 4.29  | 152.01639 | 134.00578 | 132.997<br>91 | 124.0215<br>2 | 135.9973<br>8 |
| 34                     | Benzovindiflupyr   | 10729<br>57-71-<br>1 | C18H15Cl2F<br>2N3O | 398.06<br>33  | M+H       | 11.02 | 159.03624 | 286.09668 | 146.976<br>03 | 287.1050<br>1 | 152.0621      |
| 35                     | Benzoximate        | 29104-<br>30-1       | C18H18ClN<br>O5    | 364.09<br>463 | M+H       | 11.56 | 105.03307 | 199.01479 | 95.0487<br>2  | 140.9731<br>9 | 202.0018<br>2 |
| 36                     | Bifenazate         | 14987<br>7-41-8      | C17H20N2O<br>3     | 301.15<br>467 | M+H       | 9.68  | 170.0964  | 198.09134 | 153.069<br>9  | 184.0757      |               |
| 37                     | Bifenox            | 53774-<br>07-5       | C14H9Cl2N<br>O5    | 341.99<br>305 | M+H       | 11.79 | 309.96684 | 188.9595  | 132.960<br>69 | 265.9770<br>1 | 203.0128<br>2 |
| 38                     | Bifenthrin         | 82657-<br>04-3       | C23H22ClF3<br>O2   | 445.11<br>526 | M+NH<br>4 | 15.26 | 181.10037 | 166.07703 | 165.069<br>23 | 179.0849<br>3 | 153.0688<br>6 |
| 39                     | Bispyribac-sodium  | 12540<br>1-92-5      | C19H17N4N<br>aO8   | 453.10<br>168 | M+H       | 9.19  | 179.04295 | 231.07736 | 275.066<br>1  | 116.368       | 87.65776      |
| 40                     | Bitertanol         | 55179-<br>31-2       | C20H23N3O<br>2     | 338.18<br>63  | M+H       | 11.5  | 70.03976  | 99.08044  | 57.0699<br>5  | 152.0614<br>5 | 153.0691<br>7 |
| 41                     | Boscalid           | 18842<br>5-85-6      | C18H12Cl2N<br>2O   | 343.03<br>994 | M+H       | 9.09  | 307.06183 | 271.08536 | 139.989<br>77 | 272.0931<br>1 | 96.04399      |
| 42                     | Bromoxynil         | 1689-<br>84-5        | C7H3Br2NO          | 273.85<br>086 | M-H       | 7.36  | 78.91867  | 273.85007 | 193.925<br>09 | 129.776       | 162.1506<br>5 |
| 43                     | Bupirimate         | 41483-<br>43-6       | C13H24N4O<br>3S    | 317.16<br>419 | M+H       | 10.01 | 166.09685 | 317.16266 | 108.010<br>89 | 210.1591<br>5 | 272.1051      |
| 44                     | Buprofezin         | 69327-<br>76-0       | C16H23N3O<br>S     | 306.16<br>346 | M+H       | 12.54 | 57.06995  | 106.06471 | 59.9902<br>5  | 116.0523<br>8 | 86.05965      |
| 45                     | Butachlor          | 23184-<br>66-9       | C17H26ClN<br>O2    | 312.17<br>248 | M+H       | 12.69 | 162.1279  | 238.09924 | 147.104<br>31 | 132.0809<br>6 | 146.0965<br>1 |
| 46                     | Butralin           | 33629-<br>47-9       | C14H21N3O<br>4     | 296.16<br>048 | M+H       | 13.67 | 240.0966  | 222.08621 | 57.0699<br>3  | 132.0801<br>7 | 208.0706<br>9 |
| 47                     | Cadusafos          | 10373<br>5-82-6      | C10H23O2P<br>S2    | 271.09<br>498 | M+H       | 11.59 | 130.93854 | 158.96983 | 132.972<br>08 | 128.9768<br>8 | 148.9489<br>6 |
| 48                     | Captan             | 133-<br>06-2         | C9H8Cl3NO<br>2S    | 299.94<br>141 | M+H       | 8.13  | 79.05428  | 58.06546  | 106.065<br>22 | 66.94051      | 95.04901      |
| 49                     | Carbaryl           | 63-25-<br>2          | C12H11NO2          | 202.08<br>626 | M+H       | 6.6   | 145.06419 | 115.05375 | 117.069<br>35 | 91.05384      | 155.0596<br>3 |
| 50                     | Carbendazim        | 10605-<br>21-7       | C9H9N3O2           | 192.07<br>675 | M+H       | 3.75  | 160.0499  | 105.04431 | 132.055<br>08 | 65.03848      | 90.03349      |
| 51                     | Carbofuran         | 16655-<br>82-6       | C12H15NO4          | 238.10<br>738 | M+H       | 4.23  | 163.07465 | 135.07983 | 145.064<br>24 | 181.0851<br>3 | 123.0436<br>2 |
| 52                     | Carbofuran         | 1563-<br>66-2        | C12H15NO3          | 222.11<br>247 | M+H       | 5.98  | 123.0435  | 165.09033 | 55.0543<br>2  | 91.05383      | 95.04873      |
| 53                     | Carbosulfam        | 55285-<br>11-4       | C20H32N2O<br>S     | 381.22<br>473 | M+H       | 14.85 | 118.06705 | 76.07122  | 128.142       | 160.1147      | 57.06004      |

|                        | n                     | 14-8         | 3S                  | 064           |      |       |           |           | 82            | 8             |               |
|------------------------|-----------------------|--------------|---------------------|---------------|------|-------|-----------|-----------|---------------|---------------|---------------|
| <i>Table S1 contd.</i> |                       |              |                     |               |      |       |           |           |               |               |               |
| 54                     | Carboxin              | 5234-68-4    | C12H13NO2<br>S      | 236.07<br>398 | M+H  | 6.65  | 143.01561 | 93.05697  | 124.021<br>13 | 66.04631      | 132.0439      |
| 55                     | Carfentrazone-ethyl   | 105-37-3     | C15H14Cl2F<br>3N3O3 | 412.04<br>371 | M+H  | 10.81 | 366.00184 | 345.99561 | 384.012<br>41 | 302.0302<br>5 | 338.0069<br>3 |
| 56                     | Cartap                | 15263-53-3   | C7H15N3O2<br>S2     | 238.06<br>784 | M+H  | 6.65  | 145.01117 | 93.05698  | 144.019<br>12 | 126.0169      | 145.0205<br>4 |
| 57                     | Chlorantraniliprole   | 50000-8-45-7 | C18H14BrCl<br>2N5O2 | 481.97<br>807 | M+H  | 8.25  | 130.00496 | 138.00998 | 111.994<br>16 | 160.0498      | 141.0208<br>9 |
| 58                     | Chlorbenzuron         | 19679-1-54-5 | C14H10Cl2N<br>2O2   | 309.01<br>921 | M+H  | 11.13 | 138.99417 | 156.02037 | 139.005<br>23 | 129.0096      | 75.02339      |
| 59                     | Chlordimeform         | 6164-98-3    | C10H13ClN2          | 197.08<br>4   | M+H  | 3.61  | 117.0573  | 125.01525 | 152.026<br>15 | 89.03858      |               |
| 60                     | Chlorfenapyr          | 12245-3-73-0 | C15H11BrCl<br>F3N2O | 428.95<br>876 | M+Na | 12.25 | 248.26474 | 181.94283 | 166.758<br>12 |               |               |
| 61                     | Chlorfluazuron        | 71422-67-8   | C20H9Cl3F5<br>N3O3  | 539.97<br>024 | M+H  | 14.31 | 158.04056 | 141.01402 | 186.957<br>81 | 197.9919<br>6 | 179.9812<br>6 |
| 62                     | Chlorimuron-ethyl     | 12245-3-73-0 | C15H15ClN4<br>O6S   | 415.04<br>736 | M+H  | 9.44  | 186.00599 | 184.99026 | 121.028<br>39 | 161.0111<br>2 | 213.0215      |
| 63                     | Chlorotoluron         | 15545-48-9   | C10H13ClN2<br>O     | 213.07<br>892 | M+H  | 7.32  | 140.02612 | 168.02127 | 213.079<br>85 | 171.0403<br>6 | 125.0153<br>4 |
| 64                     | Chlorpyrifos oxon     | 6515-38-4    | C5H2Cl3NO           | 197.92<br>747 | M+H  | 10.03 | 197.92747 | 106.94498 | 133.955<br>88 | 277.8938      | 161.9508      |
| 65                     | Chlorpyrifos-methyl   | 5598-13-0    | C7H7Cl3NO<br>3PS    | 321.90<br>226 | M+H  | 11.83 | 142.9921  | 78.99402  | 289.874<br>57 | 127.0148<br>9 | 62.01841      |
| 66                     | Chlorpyrifos          | 2921-88-2    | C9H11Cl3N<br>O3PS   | 349.93<br>356 | M+H  | 13.29 | 114.96082 | 106.94449 | 133.955<br>24 | 64.97855      | 96.95035      |
| 67                     | Chlorsulfuron         | 64902-72-3   | C12H12ClN5<br>O4S   | 358.03<br>713 | M+H  | 6.78  | 141.07649 | 167.05571 | 56.0495<br>7  | 58.02878      | 57.0448       |
| 68                     | Cinosulfuron          | 94593-91-6   | C15H19N5O<br>7S     | 414.10<br>78  | M+H  | 5.69  | 183.05055 | 83.02364  | 157.071<br>4  | 183.0104<br>7 | 121.0279<br>1 |
| 69                     | Clethodim Sulfone 1   | 11103-1-17-5 | C17H26ClN<br>O5S    | 392.12<br>93  | M+H  | 5.54  | 164.07031 | 98.05993  | 95.0160<br>8  | 300.1259<br>2 | 208.1329<br>5 |
|                        | Clethodim Sulfone 2   | 11103-1-17-5 | C17H26ClN<br>O5S    | 392.12<br>93  | M+H  | 7.99  | 164.07036 | 208.13304 | 206.117<br>71 | 136.0759<br>1 | 300.1263<br>4 |
| 70                     | Clethodim Sulfoxide 1 | 11103-1-14-2 | C17H26ClN<br>O4S    | 376.13<br>438 | M+H  | 5.62  | 206.11726 | 136.03915 | 164.070<br>33 | 134.0598<br>3 | 178.0860<br>6 |
|                        | Clethodim Sulfoxide 2 | 11103-1-14-2 | C17H26ClN<br>O4S    | 376.13<br>438 | M+H  | 8.07  | 164.07079 | 206.11775 | 136.075<br>56 | 268.1359<br>6 | 298.1202<br>4 |
| 71                     | Clethodim 1           | 99129-21-2   | C17H26ClN<br>O3S    | 360.13<br>947 | M+H  | 9.39  | 164.07036 | 166.08609 | 134.059<br>86 | 136.0755<br>8 | 108.0806<br>1 |
|                        | Clethodim 2           | 99129-21-2   | C17H26ClN<br>O3S    | 360.13<br>947 | M+H  | 12.13 | 164.07077 | 166.08653 | 136.075<br>91 | 121.0649<br>7 | 149.0597<br>5 |
| 72                     | Clodinafop-propargyl  | 10551-2-06-9 | C17H13ClFN<br>O4    | 350.05<br>899 | M+H  | 10.75 | 266.03763 | 222.01147 | 238.042<br>72 | 159.0479      | 238.0061<br>5 |
| 73                     | Clofentezine          | 74115-24-5   | C14H8Cl2N4          | 303.01<br>988 | M+H  | 11.78 | 138.00996 | 130.03949 | 102.033<br>41 | 75.02265      | 120.0439<br>1 |
| 74                     | Clomazone             | 81777-89-1   | C12H14ClN<br>O2     | 240.07<br>858 | M+H  | 8.16  | 125.01477 | 89.03818  | 98.9991<br>8  | 90.04604      | 63.02286      |
| 75                     | Clopyralid            | 1702-17-6    | C6H3Cl2NO<br>2      | 191.96<br>136 | M+H  | 3.36  | 109.9794  | 75.01049  | 163.966<br>49 | 146.0005<br>2 | 191.9614<br>4 |
| 76                     | Clothianidin          | 21088-0-92-5 | C6H8ClN5O<br>2S     | 250.01<br>6   | M+H  | 4.11  | 250.14079 | 131.9664  | 169.053<br>6  | 113.0163      | 110.0708<br>8 |
| 77                     | Clotrimazol           | 23593-       | C20H15N3            | 328.36        | M+Na | 7.52  | 156.17461 | 100.21671 | 173.201       | 57.07017      | 71.08556      |

| e 1                    | 75-1             |             | 862                 |               |      |       |           |           | 11            |               |               |
|------------------------|------------------|-------------|---------------------|---------------|------|-------|-----------|-----------|---------------|---------------|---------------|
| <i>Table S1 contd.</i> |                  |             |                     |               |      |       |           |           |               |               |               |
|                        | Clotrimazole 2   | 23593-75-1  | C20H45N3            | 328.36<br>862 | M+Na | 8.36  | 156.17461 | 268.29965 | 199.216<br>74 | 87.09166      | 57.07018      |
| 78                     | Coumaphos        | 56-72-4     | C14H16ClO5<br>PS    | 363.02<br>174 | M+H  | 11.39 | 226.99176 | 211.0147  | 114.960<br>88 | 225.9838<br>6 | 115.0537<br>5 |
| 79                     | Coumoxystrobin   | 850881-70-8 | C26H28O6            | 437.19<br>587 | M+H  | 13.12 | 145.06454 | 117.06966 | 115.054<br>23 | 205.0858<br>3 | 130.0414      |
| 80                     | Cyanazine        | 21725-46-2  | C9H13ClN6           | 241.09<br>63  | M+H  | 5.66  | 214.0854  | 241.09601 | 132.032<br>38 | 174.0541<br>8 | 205.1196<br>3 |
| 81                     | Cyantraniliprole | 736994-63-1 | C19H14BrCl<br>N6O2  | 473.01<br>229 | M+H  | 6.89  | 283.92081 | 130.00496 | 177.008<br>15 | 195.0186<br>2 | 185.0338      |
| 82                     | Cyclosulfamuron  | 136849-15-5 | C17H19N5O<br>6S     | 422.11<br>288 | M+H  | 10.05 | 139.03763 | 69.0084   | 154.060<br>99 | 182.0559<br>5 | 199.0824<br>3 |
| 83                     | Cycloxydim       | 101205-02-1 | C17H27NO3<br>S      | 326.17<br>844 | M+H  | 12.2  | 180.10191 | 280.13658 | 155.052<br>44 | 163.0752<br>7 | 127.0576<br>3 |
| 84                     | Cyflumetofen     | 400882-07-7 | C24H24F3N<br>O4     | 448.17<br>302 | M+H  | 12.35 | 173.0206  | 145.02563 | 217.047<br>04 | 158.9638<br>5 | 163.1121<br>1 |
| 85                     | Cyhalothrin      | 91465-08-6  | C23H19ClF3<br>NO3   | 472.08<br>978 | M+Na | 13.83 | 279.15793 | 467.13278 | 322.270<br>26 | 149.0228      | 490.0586<br>2 |
| 86                     | Cyhexatin        | 13121-70-5  | C18H34OSn           | 387.17<br>044 | M+H  | 14.35 | 287.08162 | 81.06988  |               |               |               |
| 87                     | Cymoxanil        | 57966-95-7  | C7H10N4O3           | 199.08<br>257 | M+H  | 4.69  | 156.07617 | 100.03886 | 57.0448       | 83.02364      | 68.01292      |
| 88                     | Cypermethrin     | 52315-07-8  | C22H19Cl2N<br>O3    | 416.08<br>148 | M+H  | 14.07 | 191.0025  | 127.0309  | 91.0542<br>3  | 163.0075<br>8 | 181.0648      |
| 89                     | Cyproconazole    | 113096-99-4 | C15H18ClN3<br>O     | 292.12<br>112 | M+H  | 9.77  | 70.04     | 125.01515 | 89.0385<br>1  | 98.99947      | 292.1199      |
| 90                     | Cyprodinil       | 121552-61-2 | C14H15N3            | 226.13<br>387 | M+H  | 10.49 | 226.13277 | 93.05694  | 65.0384<br>8  | 91.0538       | 95.04873      |
| 91                     | Cyromazine       | 66215-27-8  | C6H10N6             | 167.10<br>397 | M+H  | 2.77  | 68.02415  | 85.05052  | 60.0556<br>4  | 83.05999      | 125.0817      |
| 92                     | Daminozide       | 1596-84-5   | C6H12N2O3           | 161.09<br>207 | M+H  | 2.37  | 143.08093 | 61.07602  | 59.0604       | 55.01796      | 72.04417      |
| 93                     | Dazomet          | 533-74-4    | C5H10N2S2           | 163.03<br>582 | M+H  | 3.49  | 135.04401 | 163.03778 | 150.547<br>5  | 123.4612<br>5 | 171.0546      |
| 94                     | Deltamethrin     | 52918-63-5  | C22H19Br2N<br>O3    | 503.98<br>045 | M+H  | 14.05 | 89.06053  | 91.05502  | 92.0625<br>9  | 93.07061      | 121.0652      |
| 95                     | Demeton-S        | 8065-48-3   | C8H19O3PS<br>2      | 259.05<br>86  | M+H  | 8.23  | 89.04155  | 61.01062  | 55.0542<br>8  | 142.9920<br>7 | 92.22396      |
| 96                     | Desmedipham      | 13684-56-5  | C16H16N2O<br>4      | 301.11<br>828 | M+H  | 8.29  | 136.0393  | 154.04987 | 182.081<br>17 | 121.0396<br>5 | 164.0709      |
| 97                     | Diafenthiuron    | 80060-09-9  | C23H32N2O<br>S      | 385.23<br>081 | M+H  | 13.75 | 278.15268 | 236.10583 | 228.137<br>34 | 93.05694      | 270.184       |
| 98                     | Diazinon         | 333-41-5    | C12H21N2O<br>3PS    | 305.10<br>833 | M+H  | 11.08 | 169.07872 | 114.96088 | 153.101<br>58 | 100.0211<br>3 | 84.0441       |
| 99                     | Dicamba          | 1918-00-9   | C8H6Cl2O3           | 218.96<br>212 | M-H  | 4.97  | 112.98578 | 248.96063 | 174.972<br>47 | 176.9695<br>3 | 354.9373      |
| 100                    | Dichlofluanid    | 1085-98-9   | C9H11Cl2FN<br>2O2S2 | 332.96<br>958 | M+H  | 9.8   | 223.94983 | 123.01379 | 188.980<br>53 | 153.0043      |               |
| 101                    | Dichlorvos       | 62-73-7     | C4H7Cl2O4P          | 220.95<br>318 | M+H  | 5.86  | 127.01494 | 78.99401  | 112.999<br>34 | 96.96009      | 144.9810      |
| 102                    | Diclofopmethyl   | 51338-27-3  | C16H14Cl2O<br>4     | 341.03<br>419 | M+H  | 12.7  | 281.01306 | 120.0569  | 202.017<br>99 | 208.9919      |               |
| 103                    | Diethofencarb    | 87130-20-9  | C14H21NO4           | 268.15<br>433 | M+H  | 8.7   | 124.03882 | 152.06995 | 180.101<br>07 | 97.02802      | 80.04911      |

|                        |                      |             |               |           |      |       |           |           |           |           |           |
|------------------------|----------------------|-------------|---------------|-----------|------|-------|-----------|-----------|-----------|-----------|-----------|
| 104                    | Difenoconazole       | 119446-68-3 | C19H17Cl2N3O3 | 406.07197 | M+H  | 11.95 | 251.00124 | 188.03795 | 152.06139 | 223.00653 | 153.06926 |
| <i>Table S1 contd.</i> |                      |             |               |           |      |       |           |           |           |           |           |
| 105                    | Difenzoquat          | 49866-87-7  | C17H17N2      | 249.13863 | M+   | 4.13  | 249.13782 | 130.06485 | 95.04892  | 118.06481 | 131.07263 |
| 106                    | Diflubenzuron        | 35367-38-5  | C14H9ClF2N2O2 | 311.03934 | M+H  | 10.88 | 141.01416 | 158.04051 | 141.02515 | 63.02284  | 140.03009 |
| 107                    | Diflufenican         | 83164-33-4  | C19H11F5N2O2  | 395.08135 | M+H  | 12.11 | 266.04234 | 246.03589 | 238.04709 | 218.04103 | 183.04175 |
| 108                    | Dimepiperate         | 61432-55-1  | C15H21NOS     | 264.14166 | M+H  | 11.75 | 91.05386  | 146.06277 | 119.08507 | 69.06969  | 112.07526 |
| 109                    | Dimethenamid         | 87674-68-8  | C12H18ClNO2S  | 276.08195 | M+H  | 8.62  | 244.0546  | 168.0835  | 111.02583 | 126.03667 | 138.03668 |
| 110                    | Dimethoate           | 60-51-5     | C5H12NO3PS2   | 230.0069  | M+H  | 4.35  | 142.99208 | 78.99401  | 88.02119  | 170.96912 | 93.0096   |
| 111                    | Dimethomorph 1       | 110488-70-5 | C21H22ClNO4   | 388.13101 | M+H  | 8.81  | 301.06219 | 165.05452 | 138.99446 | 388.13019 | 70.02877  |
|                        | Dimethomorph 2       | 110488-70-5 | C21H22ClNO4   | 388.13101 | M+H  | 9.27  | 165.05403 | 138.99402 | 70.02852  | 242.0481  | 125.01472 |
| 112                    | Diniconazole         | 83657-24-3  | C15H17Cl2N3O  | 326.08214 | M+H  | 11.76 | 70.03975  | 158.9756  | 172.95424 | 57.06996  | 69.06959  |
| 113                    | Dinocap              | 39300-45-3  | C18H24N2O6    | 387.15266 | M+Na | 14.43 | 91.05695  | 114.96075 | 81.0697   | 136.61652 | 60.05578  |
| 114                    | Dinotefuran          | 165252-70-0 | C7H14N4O3     | 203.11387 | M+H  | 3.28  | 73.06319  | 57.04481  | 87.07879  | 114.10217 | 72.04417  |
| 115                    | Diphenylamine        | 122-39-4    | C12H11N       | 170.09643 | M+H  | 9.66  | 170.09647 | 152.06207 | 153.06981 | 128.06206 | 169.08804 |
| 116                    | Disulfoton sulfone   | 2497-06-5   | C8H19O4PS3    | 307.02558 | M+H  | 7.27  | 171.02393 | 142.99263 | 132.97191 | 232.95232 | 124.98209 |
| 117                    | Disulfoton-sulfoxide | 479073-80-8 | C8H19O3PS3    | 291.03067 | M+H  | 7.03  | 114.96117 | 156.95396 | 128.92262 | 64.97887  | 184.98547 |
| 118                    | Disulfoton           | 298-04-4    | C8H19O2PS3    | 275.03576 | M+H  | 11.59 | 89.04207  | 61.01099  | 89.03671  | 153.02174 | 167.53394 |
| 119                    | Dithianon            | 3347-22-6   | C14H4N2O2S2   | 296.9787  | M+H  | 6.63  | 268.98416 | 170.00578 | 296.97742 | 197.01662 | 239.98058 |
| 120                    | Diuron               | 330-54-1    | C9H10Cl2N2O   | 233.02429 | M+H  | 8.01  | 132.96068 | 159.97153 | 125.00271 | 233.02396 | 187.96652 |
| 121                    | Dodine               | 2439-10-3   | C13H29N3      | 228.24342 | M+H  | 10.7  | 186.22163 | 85.10118  | 57.07061  | 71.0861   |           |
| 122                    | Dufulin              | 882182-49-2 | C19H22FN2O3PS | 409.11455 | M+H  | 11.83 | 271.06866 | 251.06262 | 244.05794 | 123.02576 | 148.02095 |
| 123                    | Edifenphos           | 17109-49-8  | C14H15O2PS2   | 311.03238 | M+H  | 10.94 | 109.01025 | 111.02585 | 95.04877  | 190.99187 | 140.98213 |
| 124                    | Emamectin B1A        | 155569-91-8 | C49H75NO13    | 886.53112 | M+H  | 12.38 | 158.11756 | 82.06513  | 126.09134 | 302.1962  |           |
| 125                    | Endosulfan sulfate   | 1031-07-8   | C9H6Cl6O4S    | 418.80452 | M-H  | 11.34 | 418.80353 | 203.04895 |           |           |           |
| 126                    | Enestroburin         | 238410-11-2 | C22H22ClNO4   | 400.13101 | M+H  | 12.74 | 137.0153  | 145.06482 | 178.04185 | 102.04642 | 115.05426 |
| 127                    | Epoxiconazole        | 106325-08-0 | C17H13ClFN3O  | 330.08039 | M+H  | 10.46 | 121.04427 | 123.02349 | 129.04413 | 70.03973  | 86.09603  |
| 128                    | Ethamsulfuron        | 111353-84-5 | C14H16N6O6S   | 397.09248 | M+H  | 6.23  | 182.06735 | 154.03603 | 128.05679 | 86.03484  | 156.08798 |
| 129                    | Ethion               | 563-12-2    | C9H22O4P2S4   | 384.99489 | M+H  | 13.01 | 385.14868 | 198.09865 | 114.96087 | 197.09526 |           |
| 130                    | Ethionole            | 18158       | C13H9Cl2F3    | 396.98    | M+H  | 9.07  | 251.0686  | 227.05784 | 212.947   | 200.0471  | 240.9529  |

|                        |                                   | 7-01-9      | N4OS              | 99         |           |       |           |           | 05        | 9         |           |
|------------------------|-----------------------------------|-------------|-------------------|------------|-----------|-------|-----------|-----------|-----------|-----------|-----------|
| <i>Table S1 contd.</i> |                                   |             |                   |            |           |       |           |           |           |           |           |
| 131                    | Ethirimol                         | 23947-60-6  | C11H19N3O         | 210.16009  | M+H       | 5.1   | 140.10699 | 98.06004  | 182.12879 | 193.13354 | 70.06513  |
| 132                    | Ethofenpro<br>x                   | 80844-07-1  | C25H28O3          | 394.23767  | M+NH<br>4 | 15.2  | 359.19995 | 183.08022 | 177.12712 | 135.08026 | 107.04938 |
| 133                    | Ethofumesa<br>te                  | 26225-79-6  | C13H18O5S         | 287.09477  | M+H       | 8.67  | 121.06479 | 259.06347 | 241.05291 | 162.06753 | 161.05971 |
| 134                    | Ethopropho<br>s                   | 13194-48-4  | C8H19O2PS<br>2    | 243.06368  | M+H       | 9.84  | 114.96085 | 130.93794 | 64.97858  | 172.98473 | 77.04162  |
| 135                    | Ethoxyquin                        | 91-53-2     | C14H19NO          | 218.15394  | M+H       | 7.66  | 218.15387 | 160.07571 | 174.09138 | 148.07571 | 190.12268 |
| 136                    | Ethoxysulf<br>uron                | 126801-58-9 | C15H18N4O<br>7S   | 399.0969   | M+H       | 9.7   | 173.02092 | 210.01039 | 145.02596 | 139.03772 | 109.02837 |
| 137                    | Etozazole                         | 153233-91-1 | C21H23F2N<br>O2   | 360.17696  | M+H       | 13.67 | 141.01416 | 57.06995  | 304.11304 | 141.02493 | 177.12657 |
| 138                    | Famoxadon<br>e                    | 131807-57-3 | C22H18N2O<br>4    | 375.13393  | M+H       | 11.3  | 238.11006 | 331.1441  | 93.0573   | 239.09408 | 195.08044 |
| 139                    | Fenamidon<br>e                    | 161326-34-7 | C17H17N3O<br>S    | 312.11651  | M+H       | 8.73  | 92.04909  | 65.03849  | 236.11703 | 103.05378 | 134.07069 |
| 140                    | Fenaminstr<br>obin                | 366815-39-6 | C21H21Cl2N<br>3O3 | 434.10327  | M+H       | 12.32 | 170.97623 | 136.00743 | 205.09706 | 212.00261 | 134.05997 |
| 141                    | Fenamipho<br>s sulfone            | 31972-44-8  | C13H22NO5<br>PS   | 336.10291  | M+H       | 6.34  | 266.02335 | 108.05649 | 188.04628 | 308.06995 | 91.05383  |
| 142                    | Fenamipho<br>s sulfoxide          | 31972-43-7  | C13H22NO4<br>PS   | 320.10799  | M+H       | 6.16  | 108.0565  | 251.01256 | 171.04666 | 154.04402 | 156.02328 |
| 143                    | Fenamipho<br>s                    | 22224-92-6  | C13H22NO3<br>PS   | 304.11308  | M+H       | 10.44 | 217.00731 | 201.98389 | 234.03372 | 107.04871 | 110.01791 |
| 144                    | Fenarimol                         | 60168-88-9  | C17H12Cl2N<br>2O  | 331.03994  | M+H       | 9.89  | 81.04443  | 138.99419 | 268.05099 | 189.06908 | 54.03394  |
| 145                    | Fenzaquin                         | 120928-09-8 | C20H22N2O         | 307.18049  | M+H       | 14.34 | 57.06994  | 161.13179 | 131.08502 | 147.05469 | 146.10843 |
| 146                    | Fenbucona<br>zole                 | 114369-43-6 | C19H17ClN4        | 337.12145  | M+H       | 10.5  | 55.05434  | 69.06967  | 67.05413  | 81.06956  | 95.08514  |
| 147                    | Fenbutatino<br>xide<br>fragment 1 | 13356-08-6  | C60H78OSn2        | 1055.41694 | M+H       | 17.53 | 299.06152 | 167.05537 | 91.05737  | 149.04478 | 344.9762  |
| 148                    | Fenhexami<br>d                    | 126833-17-8 | C14H17Cl2N<br>O2  | 302.07091  | M+H       | 9.53  | 97.10079  | 55.05433  | 302.06946 | 143.01266 | 69.06968  |
| 149                    | Fenobucarb                        | 3766-81-2   | C12H17NO2         | 208.13321  | M+H       | 8.41  | 95.04876  | 57.06995  | 53.03873  | 51.02311  | 105.04433 |
| 150                    | Fenothiocar<br>b                  | 62850-32-2  | C13H19NO2<br>S    | 254.12093  | M+H       | 10.73 | 72.04413  | 56.01317  | 95.0488   | 107.04852 | 106.03166 |
| 151                    | Fenoxanil                         | 115852-48-7 | C15H18Cl2N<br>2O2 | 329.08181  | M+H       | 10.27 | 86.09605  | 188.98601 | 125.01476 | 69.0697   | 141.11424 |
| 152                    | Fenoxaprop<br>-ethyl              | 66441-23-4  | C18H16ClN<br>O5   | 362.07898  | M+H       | 12.54 | 288.0408  | 91.05386  | 121.06432 | 103.05376 | 119.04865 |
| 153                    | Fenpropath<br>rin                 | 39515-41-8  | C22H23NO3         | 350.17507  | M+H       | 13.68 | 125.09561 | 55.05434  | 57.06994  | 97.10081  | 69.06971  |
| 154                    | Fenpropidi<br>n                   | 67306-00-7  | C19H31N           | 274.25293  | M+H       | 7.48  | 274.25156 | 147.11618 | 117.06937 | 86.09606  | 132.09283 |
| 155                    | Fenpropim<br>orph                 | 67306-03-0  | C20H33NO          | 304.26349  | M+H       | 7.79  | 304.26193 | 147.11615 | 117.06934 | 132.09279 | 119.08507 |
| 156                    | Fenpyroxi<br>mate                 | 134098-61-6 | C24H27N3O<br>4    | 422.20743  | M+H       | 13.99 | 138.0656  | 214.09639 | 215.10439 | 231.09911 | 81.04439  |
| 157                    | Fenthion                          | 3761-       | C10H15O5P         | 311.01     | M+H       | 6.88  | 142.0021  | 127.01404 | 78.9940   | 139.0206  | 127.0414  |

|                        | sulfone                         | 42-0            | S2                  | 713           |           |       |           |           | 3             | 8             |               |
|------------------------|---------------------------------|-----------------|---------------------|---------------|-----------|-------|-----------|-----------|---------------|---------------|---------------|
| <i>Table S1 contd.</i> |                                 |                 |                     |               |           |       |           |           |               |               |               |
| 158                    | Fenthion sulfoxide              | 3761-41-9       | C10H15O4P<br>S2     | 295.02<br>221 | M+H       | 6.44  | 127.01489 | 279.99744 | 78.9940<br>2  | 142.9918<br>7 | 278.0181      |
| 159                    | Fenthion                        | 55-38-9         | C10H15O3P<br>S2     | 279.02<br>73  | M+H       | 11.05 | 149.02278 | 65.03848  | 105.069<br>47 | 169.0132<br>9 | 121.0278<br>5 |
| 160                    | Fentinaceta<br>te fragment<br>1 | 900-95-8        | C20H18O2Sn          | 411.04<br>015 | M+H       | 8.54  | 119.9017  | 196.94077 | 351.018<br>95 | 369.0296<br>3 | 214.9514<br>3 |
| 161                    | Fenvalerate                     | 51630-58-1      | C25H22CIN<br>O3     | 437.16<br>265 | M+NH<br>4 | 14.27 | 125.0155  | 181.06482 | 167.062<br>68 | 208.0754<br>5 | 129.7031<br>7 |
| 162                    | Fipronil-<br>desulfinyl         | 20565<br>0-65-3 | C12H4C12F6<br>N4    | 386.96<br>444 | M-H       | 10.28 | 90.0084   | 135.01091 | 68.9955<br>2  | 133.0013<br>9 | 83.00479      |
| 163                    | Fipronil-<br>sulfide            | 12006<br>7-83-6 | C12H4C12F6<br>N4S   | 418.93<br>651 | M-H       | 10.89 | 57.9753   | 170.00925 | 233.980<br>67 | 100.9675<br>9 | 217.9856<br>3 |
| 164                    | Fipronil-<br>sulfone            | 12006<br>8-36-2 | C12H4C12F6<br>N4O2S | 469.96<br>745 | M+NH<br>4 | 11.2  | 78.51429  | 119.18118 | 97.5506<br>9  | 60.05651      | 52.57012      |
| 165                    | Fipronil                        | 12006<br>8-37-3 | C12H4C12F6<br>N4OS  | 436.94<br>598 | M+H       | 10.56 | 367.95077 | 289.97611 |               |               |               |
| 166                    | Flonicamid                      | 15806<br>2-67-0 | C9H6F3N3O           | 230.05<br>357 | M+H       | 3.58  | 203.04185 | 98.0397   | 148.036<br>25 | 174.0155<br>3 | 176.0311      |
| 167                    | Florasulam                      | 14570<br>1-23-1 | C12H8F3N5<br>O3S    | 360.03<br>727 | M+H       | 5.04  | 129.03846 | 144.02557 | 360.036<br>93 | 191.9926      | 296.0746<br>2 |
| 168                    | Fluazifop-<br>butyl             | 79241-46-6      | C19H20F3N<br>O4     | 384.14<br>172 | M+H       | 12.47 | 282.07236 | 91.05388  | 328.077<br>55 | 238.0462<br>3 | 254.0776<br>2 |
| 169                    | Fluazinam                       | 79622-59-6      | C13H4C12F6<br>N4O4  | 464.95<br>866 | M+H       | 12.91 | 107.96706 | 90.97658  | 243.939<br>44 | 203.6318<br>1 | 163.5732<br>1 |
| 170                    | Flubendiam<br>ide               | 27245<br>1-65-7 | C23H22F7IN<br>2O4S  | 683.03<br>059 | M+H       | 10.74 | 273.9346  | 152.07333 | 255.924<br>09 | 135.0468      | 71.04893      |
| 171                    | Flucarbazone                    | 14502<br>6-88-6 | C12H11F3N4<br>O6S   | 397.04<br>242 | M+H       | 4.84  | 130.0611  | 115.03763 | 73.0396<br>4  |               |               |
| 172                    | Flucetosulf<br>uron             | 41292<br>8-75-7 | C18H22FN5<br>O8S    | 488.12<br>459 | M+H       | 8.85  | 156.07681 | 182.05609 | 100.039<br>27 | 136.0557<br>9 | 83.02399      |
| 173                    | Flucythrinate                   | 70124-77-5      | C26H23F2N<br>O4     | 469.19<br>334 | M+NH<br>4 | 13.47 | 181.06458 | 157.04595 | 199.093<br>51 | 412.1552<br>1 | 208.0755      |
| 174                    | Fludioxonil                     | 13134<br>1-86-1 | C12H6F2N2<br>O2     | 249.04<br>701 | M+H       | 9.27  | 180.03282 | 126.03477 | 169.040<br>6  | 151.0300<br>3 |               |
| 175                    | Flufenacet                      | 14245<br>9-58-3 | C14H13F4N3<br>O2S   | 364.07<br>374 | M+H       | 9.76  | 152.05066 | 124.0557  | 152.086<br>75 | 194.0976      | 123.0242<br>3 |
| 176                    | Flufenoxuron                    | 10146<br>3-69-8 | C21H11CIF6<br>N2O3  | 489.04<br>352 | M+H       | 13.94 | 158.04056 | 141.01404 | 306.028<br>69 | 140.0299<br>7 | 111.0473<br>5 |
| 177                    | Flufiprole                      | 70488<br>6-18-0 | C16H10C12F<br>6N4OS | 490.99<br>293 | M+H       | 11.16 | 421.99701 | 404.99432 | 388.962<br>95 | 97.99322      | 239.9584<br>4 |
| 178                    | Flumetrain                      | 62924-70-3      | C16H12CIF4<br>N3O4  | 439.07<br>907 | M+NH<br>4 | 13.61 | 143.00562 | 107.02966 | 84.9119<br>3  | 390.2979<br>4 | 422.3224<br>5 |
| 179                    | Flumetsulam                     | 98967-40-9      | C12H9F2N5<br>O2S    | 326.05<br>178 | M+H       | 4.06  | 129.03846 | 326.05151 | 262.089<br>54 | 144.0256      | 134.0586<br>9 |
| 180                    | Flumiclorac-pentyl              | 87546-18-7      | C21H23CIFN<br>O5    | 424.13<br>216 | M+H       | 12.7  | 308.04843 | 326.05899 | 135.044<br>11 | 252.0584<br>9 | 174.0118<br>9 |
| 181                    | Flumioxazin                     | 10336<br>1-09-7 | C19H15FN2<br>O4     | 355.10<br>886 | M+H       | 8.39  | 355.10855 | 327.11334 | 299.082<br>4  | 148.0557<br>1 | 176.0507      |
| 182                    | Flumorph                        | 21186<br>7-47-9 | C21H22FNO<br>4      | 372.16<br>056 | M+H       | 7.98  | 285.09174 | 165.05473 | 123.024<br>09 | 372.1604<br>3 | 226.0786<br>3 |
| 183                    | Fluopicolide                    | 23911<br>0-15-7 | C14H8C13F3<br>N2O   | 382.97<br>271 | M+H       | 9.17  | 172.95465 | 172.96599 | 108.983<br>57 | 212.0076<br>3 | 84.98359      |
| 184                    | Fluoxym                         | 65806           | C16H11CIF6          | 397.05        | M+H       | 9.7   | 172.02012 | 208.01257 | 145.025       | 397.0534      | 172.0368      |



|                        |                          | 6-35-4          | N2O                 | 369           |           |       |           |           | 3             | 1             | 8             |
|------------------------|--------------------------|-----------------|---------------------|---------------|-----------|-------|-----------|-----------|---------------|---------------|---------------|
| <i>Table S1 contd.</i> |                          |                 |                     |               |           |       |           |           |               |               |               |
| 185                    | Fluoroglyc<br>ofen-ethyl | 77501-<br>90-7  | C18H13CIF3<br>NO7   | 465.06<br>709 | M+NH<br>4 | 12.23 | 343.99283 | 222.97659 | 300.003<br>02 | 178.9868<br>9 | 166.9868<br>6 |
| 186                    | Fluroxypyr               | 69377-<br>81-7  | C7H5Cl2FN2<br>O3    | 254.97<br>34  | M+H       | 5.9   | 180.97311 | 208.968   | 196.968<br>11 | 124.9356<br>7 | 151.9465<br>5 |
| 187                    | Flurtamone               | 96525-<br>23-4  | C18H14F3N<br>O2     | 334.10<br>494 | M+H       | 8.87  | 247.07291 | 105.03349 | 178.077<br>74 | 227.0666<br>5 |               |
| 188                    | Flusilazole              | 85509-<br>19-9  | C16H15F2N3<br>Si    | 316.10<br>761 | M+H       | 10.4  | 165.06924 | 187.05772 | 316.106<br>23 | 95.04875      | 109.0443<br>6 |
| 189                    | Fluthiacet-<br>methyl    | 11733<br>7-19-6 | C15H15CIFN<br>3O3S2 | 404.03<br>002 | M+H       | 11.03 | 344.00889 | 214.98393 | 273.997<br>21 | 239.0283<br>5 | 331.0010<br>6 |
| 190                    | Flutolanil               | 66332-<br>96-5  | C17H16F3N<br>O2     | 324.12<br>059 | M+H       | 9.24  | 65.03848  | 262.06619 | 242.059<br>91 | 111.0435<br>7 | 145.0253<br>3 |
| 191                    | FlutriaFol               | 76674-<br>21-0  | C16H13F2N3<br>O     | 302.10<br>995 | M+H       | 7.36  | 123.02409 | 123.03506 | 233.076<br>98 | 137.0397<br>2 | 302.1107<br>5 |
| 192                    | Fluxapyrox<br>ad         | 90720<br>4-31-3 | C18H12F5N3<br>O     | 382.09<br>733 | M+H       | 9.42  | 234.05197 | 314.08923 | 206.033<br>36 | 159.0361<br>8 | 271.0598<br>1 |
| 193                    | Fomesafen                | 72178-<br>02-0  | C15H10CIF3<br>N2O6S | 456.02<br>384 | M+NH<br>4 | 9.45  | 222.9763  | 178.98666 | 74.0963<br>9  | 132.0180<br>1 | 166.9871<br>7 |
| 194                    | Fonophos                 | 944-<br>22-9    | C10H15OPS<br>2      | 247.03<br>747 | M+H       | 11    | 126.99722 | 62.94525  | 80.9555<br>6  | 108.9867<br>7 | 137.0180<br>2 |
| 195                    | Forchlorfen<br>uron      | 68157-<br>60-8  | C12H10ClN3<br>O     | 248.05<br>852 | M+H       | 8.28  | 129.02089 | 111.05486 | 155.000<br>11 | 93.0444       | 56.04959      |
| 196                    | Fosthiazate              | 98886-<br>44-3  | C9H18NO3P<br>S2     | 284.05<br>385 | M+H       | 6.83  | 104.01602 | 61.01065  | 199.959<br>12 | 76.02129      | 137.9590<br>6 |
| 197                    | Halosulfuro<br>n-methyl  | 10078<br>4-20-1 | C13H15ClN6<br>O7S   | 435.04<br>842 | M+H       | 10.22 | 182.0565  | 157.06126 | 139.050<br>25 | 156.0767<br>2 | 221.9736<br>2 |
| 198                    | Haloxypop-<br>methyl     | 72161<br>9-32-0 | C16H13CIF3<br>NO4   | 376.05<br>58  | M+H       | 10.81 | 316.03467 | 272.00845 | 91.0542<br>3  | 288.0893<br>6 | 119.0491<br>4 |
| 199                    | Hexaconaz<br>ole         | 79983-<br>71-4  | C14H17Cl2N<br>3O    | 314.08<br>214 | M+H       | 11.23 | 70.03977  | 158.97571 | 125.014<br>83 | 314.0802<br>6 | 57.06993      |
| 200                    | Hexaflumu<br>ron         | 86479-<br>06-3  | C16H8Cl2F6<br>N2O3  | 460.98<br>889 | M+H       | 12.53 | 158.0412  | 141.01465 | 140.031<br>25 | 277.9768<br>7 | 62.98211      |
| 201                    | Hexanoic<br>acid         | 10369-<br>83-2  | C12H25NO2           | 216.19<br>581 | M+H       | 4.06  | 143.10666 | 216.19569 | 135.043<br>91 | 227.2343<br>3 | 164.3093<br>9 |
| 202                    | Hexazinone               | 51235-<br>04-2  | C12H20N4O<br>2      | 253.16<br>59  | M+H       | 6.12  | 71.06016  | 171.08694 | 85.0757       | 83.02364      | 58.06518      |
| 203                    | Hexythiazo<br>x          | 78587-<br>05-0  | C17H21ClN2<br>O2S   | 353.10<br>85  | M+H       | 13.17 | 228.02444 | 168.05745 | 194.036<br>72 | 271.0302<br>5 | 151.0309      |
| 204                    | Hymexazol                | 10004-<br>44-1  | C4H5NO2             | 100.03<br>93  | M+H       | 8.16  | 58.029    | 85.03952  | 71.0240<br>1  | 56.96498      | 103.0505<br>2 |
| 205                    | Imazalil                 | 35554-<br>44-0  | C14H14Cl2N<br>2O    | 297.05<br>56  | M+H       | 6.7   | 158.97568 | 69.04455  | 297.054<br>14 | 200.9859<br>6 | 109.0756<br>4 |
| 206                    | Imazamox                 | 11431<br>1-32-9 | C15H19N3O<br>4      | 306.14<br>483 | M+H       | 4.49  | 306.14334 | 69.06969  | 261.122<br>07 | 86.09608      | 163.0494<br>5 |
| 207                    | Imazapic                 | 10409<br>8-48-8 | C14H17N3O<br>3      | 276.13<br>427 | M+H       | 4.67  | 231.11259 | 276.13397 | 163.050<br>22 | 145.0397      | 234.0871<br>9 |
| 208                    | Imazapyr                 | 81510-<br>83-0  | C13H15N3O<br>3      | 262.11<br>862 | M+H       | 6.28  | 217.09715 | 149.03455 | 220.071<br>67 | 86.09643      | 202.0611      |
| 209                    | Imazaquin                | 81335-<br>37-7  | C17H17N3O<br>3      | 312.13<br>427 | M+H       | 6.39  | 312.13364 | 86.09633  | 267.112<br>34 | 199.0499<br>7 | 181.0391<br>4 |
| 210                    | Imazethapy<br>r          | 81385-<br>77-5  | C15H19N3O<br>3      | 290.14<br>992 | M+H       | 5.51  | 177.06585 | 245.12845 | 230.092<br>4  | 159.0552<br>9 |               |
| 211                    | Imidaclopri<br>d         | 10582<br>7-78-9 | C9H10ClN5<br>O2     | 256.05<br>958 | M+H       | 3.93  | 209.05803 | 175.0972  | 84.0553<br>4  | 173.0816<br>8 | 128.0255<br>9 |

|                        |                                    |                 |                    |               |      |       |           |           |               |               |               |
|------------------------|------------------------------------|-----------------|--------------------|---------------|------|-------|-----------|-----------|---------------|---------------|---------------|
| 212                    | Imidaclothi<br>z                   | 10584<br>3-36-5 | C7H8CIN5O<br>2S    | 262.01<br>6   | M+H  | 4.18  | 181.05345 | 122.07079 | 123.078<br>59 | 95.04742      | 131.9664<br>2 |
| <i>Table S1 contd.</i> |                                    |                 |                    |               |      |       |           |           |               |               |               |
| 213                    | Indoxacarb                         | 14417<br>1-61-9 | C22H17CIF3<br>N3O7 | 528.07<br>799 | M+H  | 12.04 | 203.0179  | 168.02037 | 56.0131<br>7  | 218.0413<br>5 | 249.0413<br>1 |
| 214                    | Iodosulfuro<br>n-methyl-<br>Sodium | 14455<br>0-36-7 | C14H14IN5O<br>6S   | 507.97<br>822 | M+H  | 8.51  | 167.05568 | 56.04956  | 141.076<br>45 | 83.02362      | 58.02877      |
| 215                    | Ipconazole                         | 12522<br>5-28-7 | C18H24CIN3<br>O    | 334.16<br>807 | M+H  | 12.26 | 70.03995  | 125.01505 | 67.0541<br>3  | 89.03841      | 109.1011<br>7 |
| 216                    | Iprobenfos                         | 26087-<br>47-8  | C13H21O3P<br>S     | 289.10<br>218 | M+H  | 10.58 | 91.05386  | 65.03848  | 205.007<br>31 | 63.02285      | 53.0025       |
| 217                    | Iprodione                          | 36734-<br>19-7  | C13H13Cl2N<br>3O3  | 330.04<br>067 | M+H  | 10.35 | 244.9877  | 173.98729 | 161.987<br>26 | 187.9664<br>6 | 216.9927<br>2 |
| 218                    | Isazophos                          | 42509-<br>80-8  | C9H17CIN3<br>O3PS  | 314.04<br>895 | M+H  | 9.53  | 119.99541 | 114.96087 | 162.042<br>16 | 102.9689<br>3 | 135.9725<br>5 |
| 219                    | Isocarboph<br>os                   | 245-<br>01-5    | C11H16NO4<br>PS    | 312.04<br>299 | M+Na | 7.82  | 269.99539 | 236.00719 | 189.376<br>74 | 203.0666      | 121.7565<br>2 |
| 220                    | Isofenphos-<br>methyl              | 99675-<br>03-3  | C14H22NO4<br>PS    | 332.10<br>799 | M+H  | 10.73 | 121.02792 | 230.98653 | 65.0384<br>8  | 137.0049<br>3 | 216.9711      |
| 221                    | Isoprocarb                         | 2631-<br>40-5   | C11H15NO2          | 194.11<br>756 | M+H  | 7.24  | 95.04876  | 53.03872  | 51.0231       | 105.0443<br>4 | 65.03848      |
| 222                    | Chloroprop<br>ham                  | 101-<br>21-3    | C10H12CIN<br>O2    | 214.06<br>293 | M+H  | 9.47  | 154.00557 | 126.01067 | 93.0574<br>4  | 98.9997       | 172.0161<br>3 |
| 223                    | Isoprothiol<br>ane                 | 50512-<br>35-1  | C12H18O4S2         | 291.07<br>193 | M+H  | 9.3   | 188.96746 | 144.97763 | 231.014<br>41 | 172.9725<br>5 | 120.9773<br>3 |
| 224                    | Isoproturon                        | 34123-<br>59-6  | C12H18N2O          | 207.14<br>919 | M+H  | 7.57  | 72.04415  | 91.05384  | 56.0131<br>6  | 134.0957<br>9 | 165.1016<br>4 |
| 225                    | Isopyrazam                         | 88168<br>5-58-1 | C20H23F2N3<br>O    | 360.18<br>82  | M+H  | 11.8  | 244.08745 | 258.10306 | 250.096<br>95 | 278.1286<br>6 | 159.0363<br>9 |
| 226                    | Isoxaflutole                       | 14111<br>2-29-0 | C15H12F3N<br>O4S   | 360.05<br>119 | M+H  | 7.6   | 250.99843 | 219.9801  | 220.987<br>86 | 161.0208<br>8 |               |
| 227                    | Kresoxim-<br>methyl                | 14339<br>0-89-0 | C18H19NO4          | 314.13<br>868 | M+H  | 10.67 | 222.09018 | 116.04897 | 223.098<br>08 | 194.0955<br>7 | 178.0771<br>6 |
| 228                    | Lactofen                           | 77501-<br>63-4  | C19H15CIF3<br>NO7  | 462.05<br>619 | M+H  | 12.73 | 343.99205 | 222.97638 | 300.002<br>88 | 178.9865<br>5 |               |
| 229                    | Lufenuron                          | 10305<br>5-07-8 | C17H8Cl2F8<br>N2O3 | 510.98<br>57  | M+H  | 13.47 | 158.0412  | 141.01465 | 327.972<br>51 | 510.9873      | 140.0304<br>3 |
| 230                    | Malathion                          | 121-<br>75-5    | C10H19O6P<br>S2    | 331.04<br>334 | M+H  | 9.44  | 99.00727  | 142.99211 | 127.038<br>46 | 71.01254      | 78.99403      |
| 231                    | Maleic<br>Hydrazide                | 123-<br>33-1    | C4H4N2O2           | 135.01<br>65  | M+Na | 2.56  | 56.96492  | 84.9594   | 51.0230<br>8  | 80.04912      | 53.03874      |
| 232                    | Mandiprop<br>amid                  | 37472<br>6-62-2 | C23H22CIN<br>O4    | 412.13<br>101 | M+H  | 9.19  | 125.01482 | 204.10146 | 91.0539<br>2  | 164.0698<br>9 | 311.082       |
| 233                    | Matrine                            | 519-<br>02-8    | C15H24N2O          | 249.19<br>614 | M+H  | 2.87  | 249.19505 | 148.11145 | 150.127<br>08 | 110.0960<br>2 | 55.01798      |
| 234                    | MeFenacet                          | 73250-<br>68-7  | C16H14N2O<br>2S    | 299.08<br>487 | M+H  | 9.69  | 120.08028 | 148.07503 | 91.0538<br>6  | 79.05392      | 95.04875      |
| 235                    | Mepronil                           | 55814-<br>41-0  | C17H19NO2          | 270.14<br>886 | M+H  | 9.62  | 119.04869 | 91.05387  | 228.100<br>77 | 65.03848      | 162.1270<br>3 |
| 236                    | Mesosulfur<br>on-methyl            | 20846<br>5-21-8 | C17H21N5O<br>9S2   | 504.08<br>535 | M+H  | 7.66  | 182.05608 | 157.06075 | 162.054<br>87 | 306.0094<br>6 | 156.0768<br>3 |
| 237                    | Mesotrione                         | 10420<br>6-82-8 | C14H13NO7<br>S     | 340.04<br>855 | M+H  | 4.76  | 227.99612 | 104.01308 |               |               |               |
| 238                    | Metaflumiz<br>one                  | 13996<br>8-49-3 | C24H16F6N4<br>O2   | 507.12<br>502 | M+H  | 13.03 | 178.04665 | 116.04895 | 287.077<br>55 | 267.0715      | 221.0521<br>2 |

|                        |                          |              |               |               |      |       |           |           |               |               |               |
|------------------------|--------------------------|--------------|---------------|---------------|------|-------|-----------|-----------|---------------|---------------|---------------|
| 239                    | Metalaxyl-M              | 57837-19-1   | C15H21NO4     | 280.15<br>433 | M+H  | 7.47  | 192.13744 | 160.11143 | 220.132<br>2  | 148.1114<br>2 | 132.0803<br>2 |
| <i>Table S1 contd.</i> |                          |              |               |               |      |       |           |           |               |               |               |
| 240                    | Metaldehyde              | 108-62-3     | C8H16O4       | 199.09<br>408 | M+Na | 3.89  | 79.05389  | 74.09615  | 55.0543<br>6  | 69.06971      | 95.04874      |
| 241                    | Metamifop                | 25641-2-89-2 | C23H18ClFN2O4 | 441.10<br>119 | M+H  | 12.78 | 288.04074 | 123.05991 | 103.053<br>79 | 180.0811<br>2 | 91.05386      |
| 242                    | Metazachlor              | 1131-01-7    | C14H16ClN3O   | 278.10<br>547 | M+H  | 7.29  | 134.09643 | 210.06802 | 123.080<br>38 | 132.0809<br>6 | 133.0763<br>7 |
| 243                    | Metazosulfuron           | 86868-0-84-6 | C15H18ClN7O7S | 476.07<br>497 | M+H  | 9.28  | 182.05597 | 156.07672 | 295.025<br>85 | 83.02393      | 247.9524<br>8 |
| 244                    | Methamidophos            | 10265-92-6   | C2H8NO2PS     | 142.00<br>861 | M+H  | 2.67  | 112.01534 | 142.99211 | 63.9946<br>1  | 78.99403      | 127.9923<br>1 |
| 245                    | Methidathion             | 950-37-8     | C6H11N2O4PS3  | 302.96<br>913 | M+H  | 8.16  | 71.02377  | 85.0393   | 58.0287<br>9  | 145.0060<br>7 | 103.0497<br>7 |
| 246                    | Methiocarb sulfone       | 2179-25-1    | C11H15NO4S    | 258.07<br>946 | M+H  | 4.45  | 122.07212 | 107.04871 | 79.0539<br>2  | 121.0643      | 95.04877      |
| 247                    | Methiocarb sulfoxide     | 2635-10-1    | C11H15NO3S    | 242.08<br>454 | M+H  | 4.01  | 185.06229 | 122.07207 | 107.048<br>67 | 170.0388<br>5 | 153.0361<br>8 |
| 248                    | Methiocarb               | 2032-65-7    | C11H15NO2S    | 226.08<br>963 | M+H  | 8.87  | 121.06429 | 107.04868 | 91.0538<br>6  | 122.0720<br>7 | 95.04875      |
| 249                    | Methomyl 1               | 16752-77-5   | C5H10N2O2S    | 163.05<br>357 | M+H  | 3.55  | 72.9978   | 58.02879  | 88.0211<br>9  | 71.99001      | 106.0316<br>8 |
|                        | Methomyl 2               | 16752-77-5   | C5H10N2O2S    | 163.05<br>357 | M+H  | 7.37  | 72.99806  | 58.02901  | 88.0214<br>9  | 71.99026      | 106.0320<br>4 |
| 250                    | Methoxyfenozide          | 16105-0-58-4 | C22H28N2O3    | 369.21<br>727 | M+H  | 9.4   | 149.05971 | 91.05383  | 133.064<br>27 | 105.0694<br>3 | 109.0643<br>4 |
| 251                    | Metolachlor              | 51218-45-2   | C15H22ClNO2   | 284.14<br>118 | M+H  | 9.97  | 252.1138  | 176.14272 | 91.0538<br>7  | 134.0958<br>9 | 133.0881      |
| 252                    | Metrafenone              | 22089-9-03-6 | C19H21BrO5    | 409.06<br>451 | M+H  | 11.64 | 209.08083 | 226.97003 | 168.964<br>74 | 183.9518<br>9 | 165.0546<br>7 |
| 253                    | Metribuzin               | 21087-64-9   | C8H14N4OS     | 215.09<br>611 | M+H  | 6.08  | 187.10119 | 215.09612 | 131.038<br>67 | 171.0580<br>7 | 186.0826<br>9 |
| 254                    | Metsulfuron-methyl       | 74223-64-6   | C14H15N5O6S   | 382.08<br>158 | M+H  | 6.41  | 167.05571 | 56.04957  | 135.043<br>5  | 199.0051<br>3 | 58.02879      |
| 255                    | Molinate                 | 2212-67-1    | C9H17NOS      | 188.11<br>036 | M+H  | 9.19  | 55.05434  | 126.09083 | 83.0851<br>7  | 98.09606      | 70.06492      |
| 256                    | Monocrotophos            | 6923-22-4    | C7H14NO5P     | 224.06<br>824 | M+H  | 3.61  | 127.01494 | 58.02878  | 67.0177       | 98.05963      | 112.9993<br>6 |
| 257                    | Moroxydine hydrochloride | 3731-59-7    | C6H13N5O      | 172.11<br>929 | M+H  | 2     | 130.09724 | 172.11896 | 155.092<br>71 | 169.7577<br>4 |               |
| 258                    | Myclobutanil             | 88671-89-0   | C15H17ClN4    | 289.12<br>145 | M+H  | 9.48  | 70.03997  | 125.01525 | 89.0381<br>8  | 151.0302<br>9 | 116.0614<br>8 |
| 259                    | Napropamide              | 15299-99-7   | C17H21NO2     | 272.16<br>451 | M+H  | 9.93  | 129.11483 | 171.08044 | 199.075<br>36 | 114.0913<br>4 | 74.09643      |
| 260                    | Nicosulfuron             | 11199-1-09-4 | C15H18N6O6S   | 411.10<br>813 | M+H  | 6.26  | 182.0558  | 106.02859 | 83.0238<br>8  | 213.0323<br>8 | 78.03375      |
| 261                    | Nicotine                 | 54-11-5      | C10H14N2      | 163.12<br>298 | M+H  | 2.59  | 132.08078 | 130.06513 | 117.057<br>3  | 106.0651<br>3 |               |
| 262                    | Novaluron                | 11671-4-46-6 | C17H9ClF8N2O4 | 493.01<br>959 | M+H  | 12.72 | 158.0412  | 141.01456 | 310.006<br>4  |               |               |
| 263                    | Dimethoate oxon          | 1113-02-6    | C5H12NO4PS    | 214.02<br>974 | M+H  | 3.1   | 142.99263 | 182.98754 | 127.015<br>47 | 154.9926<br>3 | 196.0191<br>8 |
| 264                    | Orthosulfamuron          | 21346-4-77-8 | ?C16H20N6O6S  | 425.12<br>378 | M+H  | 7.81  | 120.04436 | 199.08249 | 227.048<br>22 | 156.0767<br>5 | 182.0560<br>5 |

|                        |                             |             |               |           |     |       |           |           |           |           |           |
|------------------------|-----------------------------|-------------|---------------|-----------|-----|-------|-----------|-----------|-----------|-----------|-----------|
| 265                    | oxadiargyl                  | 39807-15-3  | C15H14Cl2N2O3 | 341.04542 | M+H | 11.46 | 151.01773 | 223.00204 | 221.99423 | 57.06993  | 122.99905 |
| <i>Table S1 contd.</i> |                             |             |               |           |     |       |           |           |           |           |           |
| 266                    | Oxadiazon                   | 19666-30-9  | C15H18Cl2N2O3 | 345.07672 | M+H | 12.84 | 219.95525 | 176.94972 | 184.98665 | 303.02832 | 148.95494 |
| 267                    | Oxadixyl                    | 77732-09-3  | C14H18N2O4    | 279.13393 | M+H | 5.39  | 132.08029 | 133.08809 | 117.05683 | 219.11186 | 102.05457 |
| 268                    | Oxamyl                      | 23135-22-0  | C7H13N3O3S    | 220.07504 | M+H | 3.33  | 72.04439  | 90.05495  | 56.01337  |           |           |
| 269                    | Oxaziclofene                | 153197-14-9 | C20H19Cl2NO2  | 376.08656 | M+H | 12.41 | 190.08545 | 161.05905 | 55.01796  | 133.06425 | 158.97574 |
| 270                    | OxiMinoOxaMyl               | 30558-43-1  | C5H10N2O2S    | 163.05357 | M+H | 3.16  | 130.01974 | 163.03856 | 131.02791 | 133.02826 | 138.62141 |
| 271                    | Oxycarboxin                 | 5259-88-1   | C12H13NO4S    | 268.06381 | M+H | 7.04  | 175.00596 | 164.98543 | 193.01674 | 104.96409 | 83.01276  |
| 272                    | Oxydemeton-methyl           | 14325-35-0  | C6H15O4PS2    | 247.02221 | M+H | 3.36  | 127.01547 | 169.00836 | 142.99272 | 128.97722 | 136.98218 |
| 273                    | Paclbutrazol                | 76738-62-0  | C15H20ClN3O   | 294.13677 | M+H | 9.07  | 70.03975  | 125.01474 | 57.06992  | 69.06966  | 87.0801   |
| 274                    | Parathion-methyl            | 298-00-0    | C8H10NO5PS    | 264.00901 | M+H | 8.83  | 142.99289 | 249.99309 | 127.0156  | 154.97162 | 185.99042 |
| 275                    | Parathion                   | 56-38-2     | C10H14NO5PS   | 292.04031 | M+H | 10.71 | 235.97787 | 94.04147  | 114.96149 | 123.0317  | 110.01844 |
| 276                    | Penconazole                 | 66246-88-6  | C13H15Cl2N3   | 284.07158 | M+H | 10.76 | 70.03976  | 158.97565 | 122.99902 | 172.99129 | 89.03815  |
| 277                    | Pendimethalin               | 40487-42-1  | C13H19N3O4    | 282.14483 | M+H | 13.43 | 212.06549 | 194.0549  | 135.11613 | 121.10085 | 114.09064 |
| 278                    | Penoxsulam                  | 219714-96-2 | C16H14F5N5O5S | 484.07086 | M+H | 6.97  | 195.07433 | 194.06648 | 164.05597 | 139.04965 | 136.06128 |
| 279                    | Penthiopyrad                | 183675-82-3 | C16H20F3N3OS  | 360.13519 | M+H | 10.8  | 256.03507 | 177.02702 | 276.04105 | 236.02861 | 157.02069 |
| 280                    | Phenamidol                  | 39491-78-6  | C12H12N2O2    | 217.09715 | M+H | 6.01  | 104.04939 | 171.05516 | 95.04909  | 146.05994 | 103.05418 |
| 281                    | Phenazino-1-carboxylic acid | 2538-68-3   | C13H8N2O2     | 225.06585 | M+H | 7.21  | 179.06032 | 225.0656  | 207.05515 | 152.04947 | 170.05997 |
| 282                    | Phenmedipham                | 13684-63-4  | C16H16N2O4    | 301.11828 | M+H | 8.52  | 136.03879 | 168.06476 | 121.03983 | 154.05052 | 124.64648 |
| 283                    | Phenthoate                  | 13376-78-8  | C12H17O4PS2   | 321.03786 | M+H | 10.69 | 79.05389  | 142.99207 | 91.05385  | 107.04867 | 135.04346 |
| 284                    | Phorate oxon sulfone        | 2588-06-9   | C7H17O5PS2    | 277.03278 | M+H | 7.1   | 154.99263 | 183.02393 | 249.00148 | 109.00491 | 128.97698 |
| 285                    | Phorate oxon sulfoxide      | 2588-05-8   | C7H17O4PS2    | 261.03786 | M+H | 4.11  | 114.96133 | 128.97698 | 75.0263   | 171.02393 | 109.00491 |
| 286                    | Phorate oxon                | 2600-69-3   | C7H17O3PS2    | 213.07088 | M+H | 7.4   | 75.0263   | 114.96133 | 157.00828 | 185.03958 | 142.99263 |
| 287                    | Phorate sulfone             | 2588-04-7   | C7H17O4PS3    | 293.00993 | M+H | 7.31  | 114.96085 | 142.99207 | 64.9786   | 142.9379  | 171.02321 |
| 288                    | Phorate sulfoxide           | 2588-03-6   | C7H17O3PS3    | 277.01502 | M+H | 7.04  | 114.96085 | 142.93791 | 64.97858  | 170.96902 | 171.02316 |
| 289                    | Phorate                     | 298-02-2    | C7H17O2PS3    | 261.0201  | M+H | 11.36 | 75.02644  | 114.96142 | 142.93887 | 64.97899  | 59.96682  |
| 290                    | Phosalone                   | 2310-       | C12H15ClN     | 367.99    | M+H | 11.50 | 181.00057 | 114.0600  | 129.009   | 138.0100  | 139.0052  |

|                        |                    |              |                |               |     |       |           |           |               |               |               |
|------------------------|--------------------|--------------|----------------|---------------|-----|-------|-----------|-----------|---------------|---------------|---------------|
|                        |                    | 17-0         | O4PS2          | 414           |     |       |           |           | 67            | 1             | 3             |
| 291                    | Phosfolan-methyl   | 5120-23-0    | C5H10NO3PS2    | 227.99<br>125 | M+H | 3.67  | 61.01094  | 167.98795 | 127.015<br>5  | 78.99438      | 153.9722<br>6 |
| <i>Table S1 contd.</i> |                    |              |                |               |     |       |           |           |               |               |               |
| 292                    | PhosFolan          | 947-02-4     | C7H14NO3PS2    | 256.02<br>255 | M+H | 4.97  | 139.95627 | 167.98757 | 199.959<br>92 | 227.9912<br>5 | 196.0192<br>9 |
| 293                    | Phosmet            | 732-11-6     | C11H12NO4PS2   | 318.00<br>181 | M+H | 8.57  | 160.03868 | 133.02786 | 105.033<br>1  | 95.04877      | 53.03874      |
| 294                    | Phosphamidon       | 13171-21-6   | C10H19CINO5P   | 300.07<br>621 | M+H | 5.32  | 127.01492 | 72.04414  | 100.075<br>26 | 174.0673<br>7 | 75.99455      |
| 295                    | Phoxim             | 14816-18-3   | C12H15N2O3PS   | 299.06<br>138 | M+H | 11.43 | 114.96086 | 95.04876  | 53.0387<br>2  | 129.0441<br>6 | 105.0443<br>2 |
| 296                    | Phthalide          | 87-41-2      | C8H6O2         | 135.04<br>406 | M+H | 4.09  | 135.04367 | 133.02844 | 77.0383<br>8  | 105.0444<br>3 |               |
| 297                    | Picoxystrobin      | 11742-8-22-5 | C18H16F3NO4    | 368.11<br>042 | M+H | 10.6  | 145.06479 | 130.04132 | 205.085<br>8  | 146.0726      | 131.0491<br>6 |
| 298                    | Pinoxaden          | 24397-3-20-8 | C23H32N2O4     | 401.24<br>348 | M+H | 11.3  | 317.18463 | 57.06997  | 289.153<br>63 | 131.0850<br>8 | 101.0705<br>6 |
| 299                    | Piperonyl butoxide | 51-03-6      | C19H30O5       | 339.21<br>66  | M+H | 12.81 | 177.09101 | 119.08553 | 149.059<br>71 | 147.0804<br>4 |               |
| 300                    | Pirimicarb         | 23103-98-2   | C11H18N4O2     | 239.15<br>025 | M+H | 5.75  | 72.04413  | 182.1281  | 85.0756<br>8  | 109.0756<br>1 | 56.01316      |
| 301                    | Pirimiphos-methyl  | 29232-93-7   | C11H20N3O3PS   | 306.10<br>358 | M+H | 11.3  | 67.02895  | 108.0552  | 306.102<br>14 | 164.1176<br>8 | 95.06         |
| 302                    | Pretilachlor       | 51218-49-6   | C17H26CINO2    | 312.17<br>248 | M+H | 11.95 | 252.1147  | 132.08067 | 176.143<br>22 | 147.1041<br>1 | 105.0698<br>3 |
| 303                    | Probenazole        | 27605-76-1   | C10H9NO3S      | 224.03<br>759 | M+H | 5.76  | 196.00629 | 184.00629 | 130.040<br>15 | 168.9955<br>4 | 120.0446<br>2 |
| 304                    | Prochloraz         | 67747-09-5   | C15H16Cl3N3O2  | 376.03<br>809 | M+H | 11.26 | 70.02853  | 70.06493  | 265.952<br>48 | 56.04956      | 85.08826      |
| 305                    | ProFenophos        | 41198-08-7   | C11H15BrClO3PS | 372.94<br>242 | M+H | 12.36 | 128.00177 | 114.96085 | 143.978<br>91 | 158.9433<br>6 | 141.9632<br>4 |
| 306                    | Prohexadione       | 88805-35-0   | C10H12O5       | 213.07<br>575 | M+H | 5.26  | 157.04954 | 129.05482 | 139.038<br>97 | 149.0238<br>8 | 121.0648<br>7 |
| 307                    | Prometryn          | 7287-19-6    | C10H19N5S      | 242.14<br>339 | M+H | 8.97  | 158.04949 | 200.09644 | 242.143<br>1  | 152.1181<br>2 | 152.0930<br>2 |
| 308                    | Propachlor         | 1918-16-7    | C11H14CINO     | 212.08<br>367 | M+H | 7.37  | 170.03672 | 152.02615 | 134.059<br>83 | 134.0965<br>7 | 212.0833      |
| 309                    | Propamocarb        | 25606-41-1   | C9H20N2O2      | 189.15<br>975 | M+H | 3.1   | 102.05457 | 74.02335  | 58.0651<br>8  | 144.1016<br>5 | 86.09608      |
| 310                    | Propanil           | 709-98-8     | C9H9Cl2NO      | 218.01<br>34  | M+H | 9.02  | 127.01834 | 161.98715 | 218.013<br>28 | 126.0106<br>9 | 129.5449<br>2 |
| 311                    | Propargite         | 2312-35-8    | C19H26O4S      | 351.16<br>246 | M+H | 13.51 | 57.06994  | 81.06956  | 107.048<br>68 | 175.1109<br>6 | 79.0539       |
| 312                    | Propiconazole      | 60207-90-1   | C15H17Cl2N3O2  | 342.07<br>706 | M+H | 11.02 | 158.97568 | 69.06969  | 122.999<br>09 | 70.03976      | 172.9546<br>1 |
| 313                    | Propisochlor       | 86763-47-5   | C15H22CINO2    | 284.14<br>118 | M+H | 10.68 | 148.11212 | 212.08374 | 133.088<br>68 | 184.0526<br>4 | 224.0836<br>9 |
| 314                    | Propyrisulfuron    | 57041-5-88-2 | C16H18CINO7O5S | 560.02<br>076 | M+H | 9.82  | 196.06346 | 236.03331 | 139.037<br>6  | 261.0286<br>6 | 279.0391<br>8 |
| 315                    | Propyzamide        | 23950-58-5   | C12H11Cl2NO    | 256.02<br>905 | M+H | 9.32  | 171.05519 | 146.05997 | 128.049<br>39 | 189.0658<br>4 | 129.0334<br>3 |
| 316                    | Prothioconazole    | 12098-3-64-4 | C14H15Cl2N3OS  | 344.03<br>856 | M+H | 11.48 | 125.01525 | 225.02323 | 326.028       | 189.0465<br>5 | 102.0120<br>4 |
| 317                    | Pymetrozin         | 12331        | C10H11N5O      | 218.10        | M+H | 2.18  | 105.04122 | 78.02252  | 51.0231       | 111.0310      | 70.04122      |

|                        |                      |                 |                     |               |           |       |           |           |               |               |               |
|------------------------|----------------------|-----------------|---------------------|---------------|-----------|-------|-----------|-----------|---------------|---------------|---------------|
|                        | e                    | 2-89-0          |                     | 364           |           |       |           |           | 1             | 5             |               |
| 318                    | Pyraclostrobin       | 17501<br>3-18-0 | C19H18ClN3<br>O4    | 388.10<br>586 | M+H       | 11.53 | 163.0621  | 164.06993 | 133.051<br>68 | 149.0465<br>9 | 105.0568<br>9 |
| <i>Table S1 contd.</i> |                      |                 |                     |               |           |       |           |           |               |               |               |
| 319                    | Pyraflufen-ethyl     | 12963<br>0-17-7 | C15H13Cl2F<br>3N2O4 | 430.05<br>427 | M+NH<br>4 | 11.19 | 338.99094 | 288.99414 | 304.022<br>09 | 260.9992<br>2 | 384.9964<br>2 |
| 320                    | Pyrametostrobin      | 91541<br>0-70-7 | C21H23N3O<br>4      | 382.17<br>613 | M+H       | 10.7  | 163.06247 | 133.05193 | 149.046<br>95 | 164.0705<br>4 | 105.0571<br>4 |
| 321                    | Pyraoxystrobin       | 86258<br>8-11-2 | C22H21ClN2<br>O4    | 413.12<br>626 | M+H       | 11.62 | 145.06483 | 115.05425 | 117.069<br>88 | 205.0859<br>1 | 130.0413<br>5 |
| 322                    | Pyrazosulfuron-ethyl | 93697-<br>74-6  | C14H18N6O<br>7S     | 415.10<br>304 | M+H       | 10.23 | 182.0564  | 83.02412  | 157.061<br>08 | 139.0504<br>8 | 119.0857<br>1 |
| 323                    | Pyrethrin 1          | 121-<br>21-1    | C21H28O3            | 329.21<br>112 | M+H       | 13.65 | 69.03361  | 105.06989 | 128.061<br>98 | 133.1011      | 143.0855<br>3 |
| 324                    | Pyrethrin 2          | 121-<br>29-9    | C22H28O5            | 373.20<br>095 | M+H       | 12.01 | 105.06986 | 69.03359  | 133.101<br>12 | 143.0855<br>1 | 161.0960<br>4 |
| 325                    | Pyribenzoxim         | 16808<br>8-61-7 | C32H27N5O<br>8      | 610.19<br>324 | M+H       | 12.86 | 180.07999 | 95.04875  | 289.080<br>35 | 119.0122<br>5 | 53.03871      |
| 326                    | Pyridaben            | 96489-<br>71-3  | C19H25ClN2<br>OS    | 365.14<br>489 | M+H       | 14.31 | 147.11624 | 132.09283 | 119.085<br>08 | 117.0694<br>2 | 105.0695      |
| 327                    | Pyridalyl            | 17910<br>1-81-6 | C18H14Cl4F<br>3NO3  | 489.97<br>527 | M+H       | 15.88 | 164.03163 | 183.02065 | 204.062<br>91 | 326.9500<br>7 | 148.0367<br>7 |
| 328                    | Pyridaphenthion      | 119-<br>12-0    | C14H17N2O<br>4PS    | 341.07<br>194 | M+H       | 9.6   | 189.06503 | 92.04909  | 205.042<br>11 | 65.03848      | 114.9608<br>6 |
| 329                    | Pyrifthalid          | 13518<br>6-78-6 | C15H14N2O<br>4S     | 319.07<br>47  | M+H       | 8.62  | 319.07318 | 139.04961 | 83.0236<br>4  | 157.0602<br>9 | 93.00797      |
| 330                    | Pyrimethanil         | 53112-<br>28-0  | C12H13N3            | 200.11<br>822 | M+H       | 8.4   | 200.11743 | 82.06481  | 53.0387<br>4  | 107.0600<br>1 | 80.04916      |
| 331                    | Pyrimorph            | 86839<br>0-90-3 | C22H25ClN2<br>O2    | 385.16<br>773 | M+H       | 11.12 | 385.16757 | 57.07021  | 242.036<br>56 | 256.0886<br>8 | 272.1199<br>6 |
| 332                    | Pyriproxyfen         | 95737-<br>68-1  | C20H19NO3           | 322.14<br>377 | M+H       | 13.07 | 185.05971 | 129.06993 | 134.072<br>68 | 128.0620<br>7 | 227.1067      |
| 333                    | Pyrisoxazole         | 84774<br>9-37-5 | C16H17ClN2<br>O     | 289.11<br>022 | M+H       | 7.68  | 120.04435 | 92.04943  | 122.059<br>78 | 80.04942      | 56.04977      |
| 334                    | Quinalphos           | 13593-<br>03-8  | C12H15N2O<br>3PS    | 299.06<br>138 | M+H       | 10.83 | 114.96086 | 147.05467 | 163.031<br>71 | 119.0599<br>1 | 242.9976<br>2 |
| 335                    | Quinclorac           | 84087-<br>01-4  | C10H5Cl2N<br>O2     | 241.97<br>701 | M+H       | 5.29  | 161.00285 | 213.98219 | 124.018<br>37 | 195.9717<br>6 | 126.0339      |
| 336                    | Quinoxifen           | 12449<br>5-18-7 | C15H8Cl2FN<br>O     | 308.00<br>397 | M+H       | 13.32 | 308.00238 | 162.00977 | 228.968<br>08 | 213.981       | 75.02264      |
| 337                    | Quizalofop           | 76578-<br>12-6  | C17H13ClN2<br>O4    | 345.06<br>366 | M+H       | 10.76 | 299.0571  | 345.06241 | 244.039<br>6  | 255.0317<br>7 | 163.0057<br>1 |
| 338                    | Quizalofop-ethyl     | 76578-<br>14-8  | C19H17ClN2<br>O4    | 373.09<br>496 | M+H       | 12.54 | 299.0567  | 91.05383  | 255.030<br>75 | 192.0672<br>9 | 163.0050<br>2 |
| 339                    | Rimsulfuron-         | 12293<br>1-48-0 | C14H17N5O<br>7S2    | 432.06<br>422 | M+H       | 7.2   | 182.05528 | 83.02361  | 325.094<br>85 | 157.0601<br>5 | 106.0647      |
| 340                    | Rotenone             | 83-79-<br>4     | C23H22O6            | 395.14<br>891 | M+H       | 10.55 | 213.08998 | 192.07724 | 191.069<br>46 | 203.0693<br>7 | 195.0797<br>6 |
| 341                    | Saflufenacil         | 37213<br>7-35-4 | C17H17ClF4<br>N4O5S | 501.06<br>171 | M+H       | 8.55  | 197.97526 | 348.99924 | 366.026       | 459.0144      | 384.0366<br>5 |
| 342                    | Sedaxane             | 87496<br>7-67-6 | C18H19F2N3<br>O     | 332.15<br>69  | M+H       | 9.6   | 159.03619 | 139.03003 | 292.143<br>65 | 81.06995      | 263.1041<br>3 |
| 343                    | Sethoxydim 1         | 74051-<br>80-2  | C17H29NO3<br>S      | 328.19<br>409 | M+H       | 8.97  | 178.086   | 134.05983 | 180.101<br>61 | 107.049       | 79.05416      |
|                        | Sethoxydim 2         | 74051-<br>80-2  | C17H29NO3<br>S      | 328.19<br>409 | M+H       | 12.65 | 178.08604 | 180.10172 | 107.049       | 110.0599<br>2 | 112.0755<br>4 |

|                        |                       |                 |                      |               |     |       |           |           |               |               |               |
|------------------------|-----------------------|-----------------|----------------------|---------------|-----|-------|-----------|-----------|---------------|---------------|---------------|
| 344                    | Silthiofam            | 17521<br>7-20-6 | C13H21NOS<br>Si      | 268.11<br>859 | M+H | 10.4  | 139.02121 | 252.08729 | 268.118<br>16 | 197.0451<br>7 | 212.0559<br>5 |
| 345                    | Simazine              | 122-<br>34-9    | C7H12ClN5            | 202.08<br>54  | M+H | 6.19  | 132.0323  | 124.08705 | 202.085<br>46 | 174.0543<br>1 | 166.1086<br>7 |
| <i>Table S1 contd.</i> |                       |                 |                      |               |     |       |           |           |               |               |               |
| 346                    | Simetryn              | 1014-<br>70-6   | C8H15N5S             | 214.11<br>209 | M+H | 6.55  | 68.02416  | 124.08644 | 214.111<br>08 | 96.05522      | 71.06013      |
| 347                    | Spinetoram            | 18716<br>6-40-1 | C42H69NO1<br>0       | 748.49<br>942 | M+H | 11.57 | 142.12247 | 98.09625  | 97.0646<br>7  | 99.08028      | 75.04397      |
| 348                    | Spinosad              | 16831<br>6-95-8 | C41H65NO1<br>0       | 732.46<br>812 | M+H | 10.99 | 142.12263 | 732.46729 | 98.0964       | 97.0648       | 99.08039      |
| 349                    | Spirodiclofen         | 14847<br>7-71-8 | C21H24Cl2O<br>4      | 411.11<br>244 | M+H | 13.84 | 71.08529  | 313.03763 | 212.949<br>6  | 184.9547<br>1 | 156.9599      |
| 350                    | Spirotetramat         | 20331<br>3-25-1 | C21H27NO5            | 374.19<br>62  | M+H | 9.92  | 216.10097 | 302.17361 | 330.204<br>77 | 270.1476<br>7 | 117.0694      |
| 351                    | Sulcotrione           | 99105-<br>77-8  | C14H13ClO5<br>S      | 329.02<br>45  | M+H | 5.45  | 157.04954 | 293.04782 | 139.039<br>05 | 329.0242      | 246.0521<br>2 |
| 352                    | Sulfentrazone         | 12283<br>6-35-5 | C11H10Cl2F<br>2N4O3S | 386.98<br>915 | M+H | 6.47  | 386.98883 | 163.96646 | 306.995<br>45 | 273.0345<br>8 | 308.0035<br>4 |
| 353                    | Sulfluramid           | 4151-<br>50-2   | C10H6F17N<br>O2S     | 525.97<br>75  | M-H | 13.73 | 525.97797 | 168.98949 | 64.9702<br>1  | 118.9925<br>5 | 218.9861<br>5 |
| 354                    | Sulfotepp             | 17233<br>1-68-9 | C8H20O5P2<br>S2      | 323.03<br>001 | M+H | 10.7  | 114.96088 | 142.99211 | 171.023<br>22 | 98.98376      | 64.97858      |
| 355                    | Sulfoxaflor           | 94657<br>8-00-3 | C10H10F3N3<br>OS     | 278.05<br>694 | M+H | 4.46  | 174.05208 | 172.05637 | 122.060<br>08 | 127.0354      | 134.0401<br>2 |
| 356                    | Tau-fluvalinate       | 10285<br>1-06-9 | C26H22ClF3<br>N2O3   | 503.13<br>438 | M+H | 14.64 | 181.06396 | 208.07474 | 180.08        | 153.0692      | 152.0613<br>3 |
| 357                    | Tebuconazole          | 10753<br>4-96-3 | C16H22ClN3<br>O      | 308.15<br>242 | M+H | 10.92 | 70.03978  | 125.01477 | 308.151       | 59.04919      | 116.0616<br>6 |
| 358                    | Tebufenozide          | 11241<br>0-23-8 | C22H28N2O<br>2       | 353.22<br>235 | M+H | 10.34 | 133.06427 | 105.06944 | 79.0538<br>9  | 72.08051      | 123.0798<br>8 |
| 359                    | Tebuthiuron           | 34014-<br>18-1  | C9H16N4OS            | 229.11<br>176 | M+H | 6.37  | 172.09029 | 157.06682 | 142.043<br>47 | 229.1114<br>8 | 156.0589<br>6 |
| 360                    | Teflubenzuron         | 83121-<br>18-0  | C14H6Cl2F4<br>N2O2   | 380.98<br>152 | M+H | 13.42 | 158.0412  | 141.01465 |               |               |               |
| 361                    | Terbufosulfone        | 56070-<br>16-7  | C9H21O4PS<br>3       | 321.04<br>123 | M+H | 8.49  | 114.96133 | 171.02393 | 142.992<br>63 | 128.9769<br>8 |               |
| 362                    | Terbufosulfoxide      | 10548-<br>10-4  | C9H21O3PS<br>3       | 305.04<br>632 | M+H | 8.46  | 114.96089 | 130.938   | 187.000<br>37 | 158.9691<br>6 | 57.06995      |
| 363                    | Terbufos              | 13071-<br>79-9  | C9H21O2PS<br>3       | 289.05<br>141 | M+H | 12.66 | 57.06995  | 114.96094 | 90.9762<br>8  | 103.0571<br>4 | 130.9380<br>3 |
| 364                    | Terbuthylazine        | 5915-<br>41-3   | C9H16ClN5            | 230.11<br>67  | M+H | 8.87  | 174.0541  | 132.0323  | 146.022<br>8  | 138.0773<br>9 | 230.1168<br>4 |
| 365                    | Tetraconazole         | 11228<br>1-77-3 | C13H11Cl2F<br>4N3O   | 372.02<br>881 | M+H | 10.16 | 158.97563 | 70.03976  | 372.027<br>04 | 122.9990<br>2 | 150.0223<br>7 |
| 366                    | Thiabendazole         | 148-<br>79-8    | C10H7N3S             | 202.04<br>334 | M+H | 4.24  | 202.04251 | 131.05991 | 65.0385<br>1  | 175.0318      | 92.04911      |
| 367                    | Thiacloprid           | 11198<br>8-49-9 | C10H9ClN4S           | 253.03<br>092 | M+H | 4.78  | 126.01002 | 98.9992   | 90.0335       | 72.98369      | 63.02286      |
| 368                    | Thiamethoxam          | 15371<br>9-23-4 | C8H10ClN5<br>O3S     | 292.02<br>656 | M+H | 3.48  | 131.9664  | 211.06384 | 181.053<br>44 | 108.0551<br>7 | 69.04453      |
| 369                    | Thidiazuron           | 51707-<br>55-2  | C9H8N4OS             | 221.04<br>916 | M+H | 6.58  | 102.0116  | 127.99073 | 59.9902<br>4  | 94.06474      | 95.04871      |
| 370                    | Thiencarbazone-methyl | 31781<br>5-83-1 | C12H14N4O<br>7S2     | 391.03<br>767 | M+H | 5.48  | 130.0611  | 218.97803 | 229.957<br>63 | 359.0114<br>5 | 316.0056<br>4 |

|                        |                       |             |                  |           |     |       |           |           |           |           |           |
|------------------------|-----------------------|-------------|------------------|-----------|-----|-------|-----------|-----------|-----------|-----------|-----------|
| 371                    | Thifensulfuron-methyl | 79277-27-3  | C12H13N5O6S2     | 388.038   | M+H | 6.04  | 167.05635 | 141.07709 | 222.97294 |           |           |
| 372                    | Thifluzamide          | 130000-40-7 | C13H6Br2F6N2O2S  | 526.84937 | M+H | 10.34 | 166.01318 | 526.84918 | 168.00879 | 148.00253 | 506.84311 |
| <i>Table S1 contd.</i> |                       |             |                  |           |     |       |           |           |           |           |           |
| 373                    | Thiobencarb           | 28249-77-6  | C12H16ClNOS      | 258.07139 | M+H | 11.42 | 125.01474 | 89.03818  | 98.99916  | 90.04603  | 63.02285  |
| 374                    | Thiocyclam            | 31895-21-3  | C5H11NS3         | 182.01264 | M+H | 3     | 136.95491 | 182.0127  | 163.6776  | 142.14673 | 152.73273 |
| 375                    | Thiodicarb            | 59669-26-0  | C10H18N4O4S3     | 355.05629 | M+H | 7.36  | 88.02116  | 107.9931  | 62.00584  | 78.9667   | 72.99776  |
| 376                    | Thiophanate-methyl    | 23564-05-8  | C12H14N4O4S2     | 343.05292 | M+H | 6.2   | 151.03245 | 93.05695  | 85.96915  | 74.0056   | 118.05202 |
| 377                    | Thiophanate           | 23564-06-9  | C14H18N4O4S2     | 371.08422 | M+H | 8.04  | 151.03245 | 282.03654 | 134.07127 |           |           |
| 378                    | Tolclofosmethyl       | 57018-04-9  | C9H11Cl2O3PS     | 300.96163 | M+H | 11.54 | 142.99286 | 174.97144 | 78.99445  | 112.00756 | 129.0103  |
| 379                    | Tolfenpyrid           | 129558-76-5 | C21H22ClN3O2     | 384.14733 | M+H | 13.01 | 197.09532 | 154.07704 | 117.02092 | 91.05386  | 145.05211 |
| 380                    | Tolylfluandid         | 731-27-1    | C10H13Cl2FN2O2S2 | 346.98523 | M+H | 10.76 | 137.02933 | 237.96527 | 91.0542   | 136.0215  | 110.01846 |
| 381                    | topramezone           | 210631-68-8 | C16H17N3O5S      | 364.09617 | M+H | 3.73  | 334.0856  | 346.0856  | 125.03455 | 236.03759 | 210.05833 |
| 382                    | Tralkoxydim           | 87820-88-0  | C20H27NO3        | 330.20637 | M+H | 13.14 | 138.05495 | 284.16451 | 122.06003 | 133.1013  | 140.07066 |
| 383                    | Triadimefon           | 43121-43-3  | C14H16ClN3O2     | 294.10038 | M+H | 9.37  | 69.06969  | 57.06995  | 197.07198 | 98.99921  | 141.00964 |
| 384                    | Triadimenol           | 43121-43-3  | C14H18ClN3O2     | 296.11603 | M+H | 9.62  | 70.03975  | 99.08044  | 57.06994  | 296.29309 | 69.06972  |
| 385                    | Triallate             | 2303-17-5   | C10H16Cl3NOS     | 304.00909 | M+H | 13    | 142.92166 | 140.93274 | 128.10695 | 261.9617  | 304.0083  |
| 386                    | Triasulfuron          | 82097-50-5  | C14H16ClN5O5S    | 402.06334 | M+H | 5.91  | 167.05684 | 141.07709 | 137.00605 | 121.02845 | 141.00052 |
| 387                    | Triazophos            | 24017-47-8  | C12H16N3O3PS     | 314.07228 | M+H | 9.9   | 162.06552 | 114.96087 | 119.05992 | 92.04909  | 65.03846  |
| 388                    | Tribenuron-methyl     | 101200-48-0 | C6H10N4O         | 396.09273 | M+H | 7.67  | 155.09276 | 83.024    | 56.04983  | 57.04505  | 135.0441  |
| 389                    | Trichlorfon           | 52-68-6     | C4H8Cl3O4P       | 256.92985 | M+H | 4.32  | 127.01493 | 78.99403  | 82.94461  | 93.00958  | 62.99934  |
| 390                    | Triclopyricarb        | 902760-40-1 | C15H13Cl3N2O4    | 391.00137 | M+H | 12.75 | 163.06281 | 133.05225 | 149.04723 | 164.0706  | 162.05495 |
| 391                    | Triclopyr             | 55335-06-3  | C7H4Cl3NO3       | 253.9184  | M-H | 8.5   | 195.91315 | 198.7085  | 244.47971 | 183.47266 |           |
| 392                    | Tricyclazole          | 41814-78-2  | C9H7N3S          | 190.04334 | M+H | 5.18  | 190.04254 | 163.03177 | 136.02106 | 109.01024 | 65.0385   |
| 393                    | Trifloxystrobin       | 141517-21-7 | C20H19F3N2O4     | 409.13697 | M+H | 11.99 | 186.05177 | 145.02596 | 116.04948 | 131.0724  | 206.08031 |
| 394                    | Triflumizole          | 68694-11-1  | C15H15ClF3N3O    | 346.09285 | M+H | 12.03 | 55.05434  | 73.06451  | 69.04456  | 278.05432 | 53.00235  |
| 395                    | Triflumuron           | 64628-44-0  | C15H10ClF3N2O3   | 359.04048 | M+H | 11.67 | 138.99414 | 156.02039 | 139.00505 | 129.00963 | 113.01478 |
| 396                    | Triflusulfuron-methyl | 126535-15-7 | C17H19F3N6O6S    | 493.11116 | M+H | 9.52  | 264.06973 | 96.05537  | 71.06052  | 238.09099 | 90.97675  |
| 397                    | Triforine             | 26644-46-2  | C10H14Cl6N4O2    | 432.93207 | M+H | 8.29  | 98.08344  | 97.07563  | 212.97357 | 82.94463  | 191.01288 |
| 398                    | Trinexapac            | 95266-      | C12H16O5         | 253.10    | M+H | 7.85  | 60.03278  | 68.00680  | 183.027   | 139.0383  | 111.0435  |



|                        |              |             |              |           |     |       |           |           |           |           |           |
|------------------------|--------------|-------------|--------------|-----------|-----|-------|-----------|-----------|-----------|-----------|-----------|
|                        | -ethyl       | 40-3        |              | 705       |     |       |           |           | 95        | 5         | 2         |
| 399                    | Uniconazole  | 83657-22-1  | C15H18ClN3O  | 292.12112 | M+H | 10.31 | 70.03976  | 292.11972 | 125.01481 | 138.99394 | 57.06997  |
| <i>Table S1 contd.</i> |              |             |              |           |     |       |           |           |           |           |           |
| 400                    | Vamidothion  | 2275-23-2   | C8H18NO4PS2  | 288.04876 | M+H | 4.12  | 58.02907  | 146.06319 | 118.03214 | 58.06546  | 86.06007  |
| 401                    | Zoxamide     | 56052-68-5  | C14H16Cl3NO2 | 336.03194 | M+H | 11.22 | 186.97011 | 158.97569 | 122.99907 | 98.99917  | 203.99715 |
| 402                    | Metamitron   | 41394-05-2  | C10H10N4O    | 203.09274 | M+H | 4.4   | 104.04942 | 175.09781 | 203.09253 | 174.0787  | 95.04913  |
| 403                    | Monosulfuron | 155860-63-2 | C13H12N4O5S  | 338.05537 | M+H | 5.32  | 136.05046 | 110.07123 | 111.0552  | 93.0447   | 66.03395  |

<sup>a</sup> Pesticides with multiple entries mainly due to the two cases: (1) the occurrence of two extracted ions peaks with different retention time and (2) in-source fragmentation, which main product ion was input for further fragmentation.

**Table S2** Summary of 68 screened samples.

| Sample name  | Number | Sample origin | Sample name            | Number | Sample origin | Sample name       | Number | Sample origin |
|--------------|--------|---------------|------------------------|--------|---------------|-------------------|--------|---------------|
| Cucumber     | 2      | Guangzhou     | Asparagus bean         | 1      | Guangzhou     | Leaf lettuce      | 1      | Foshan        |
| Luffa        | 1      | Guangzhou     | Chinese cabbage        | 1      | Guangzhou     | Peach             | 1      | Foshan        |
| Grape        | 4      | Guangzhou     | Eggplant               | 1      | Guangzhou     | Carrot            | 1      | Foshan        |
| Peach        | 3      | Guangzhou     | Ginger                 | 1      | Guangzhou     | Shiitake mushroom | 1      | Foshan        |
| Leaf lettuce | 1      | Guangzhou     | Lotus root             | 1      | Guangzhou     | Cucumber          | 3      | Foshan        |
| Spinach      | 2      | Guangzhou     | Common chinese cabbage | 2      | Foshan        | Pea bean          | 2      | Foshan        |
| Leek         | 3      | Guangzhou     | Eggplant               | 1      | Foshan        | Celery            | 1      | Foshan        |
| Watermelon   | 1      | Guangzhou     | Leek                   | 1      | Foshan        | Broccoli          | 1      | Foshan        |
| Cabbage      | 1      | Guangzhou     | Straw mushroom         | 1      | Foshan        | Potato            | 1      | Foshan        |
| Scallion     | 1      | Guangzhou     | Watermelon             | 2      | Foshan        | Pear              | 2      | Sichuan       |
| Celery       | 1      | Guangzhou     | Grape                  | 4      | Foshan        | Jujube            | 1      | Sichuan       |
| Pepper       | 1      | Guangzhou     | Tomato                 | 3      | Foshan        | Citrus            | 2      | Sichuan       |
| Bitter gourd | 1      | Guangzhou     | Asparagus bean         | 1      | Foshan        | Apple             | 2      | Sichuan       |
| Pea bean     | 1      | Guangzhou     | Chinese cabbage        | 1      | Foshan        | Watermelon        | 1      | Sichuan       |
| Cauliflower  | 1      | Guangzhou     | Pepper                 | 3      | Foshan        |                   |        |               |

**Table S3** Isomers, their exact  $m/z$  and UHPLC retention time.

| Pesticide                      | Molecular Formula | Exact $m/z$ | Rt (min) | Rt Difference (min) |
|--------------------------------|-------------------|-------------|----------|---------------------|
| Methomyl                       | C5H10N2O2S        | 163.05357   | 3.55     | 0.39                |
| OxiMinoOxaMyl                  | C5H10N2O2S        | 163.05357   | 3.16     |                     |
| 2,4-Dichlorophenoxyacetic acid | C8H6Cl2O3         | 218.96212   | 7.39     | 2.42                |
| Dicamba                        | C8H6Cl2O3         | 218.96212   | 4.97     |                     |
| Acetochlor                     | C14H20ClNO2       | 270.12553   | 9.86     | 0                   |
| Alachlor                       | C14H20ClNO2       | 270.12553   | 9.86     |                     |
| Butachlor                      | C17H26ClNO2       | 312.17248   | 12.69    | 0.74                |
| Pretilachlor                   | C17H26ClNO2       | 312.17248   | 11.95    |                     |
| Cyproconazole                  | C15H18ClN3O       | 292.12112   | 9.77     | 0.54                |
| Uniconazole                    | C15H18ClN3O       | 292.12112   | 10.31    |                     |
| Desmedipham                    | C16H16N2O4        | 301.11828   | 8.29     | 0.23                |
| Phenmedipham                   | C16H16N2O4        | 301.11828   | 8.52     |                     |
| Phoxim                         | C12H15N2O3PS      | 298.05355   | 11.43    | 0.6                 |
| Quinalphos                     | C12H15N2O3PS      | 298.05355   | 10.83    |                     |
| Metolachlor                    | C15H22ClNO2       | 284.14118   | 9.97     | 0.71                |
| Propisochlor                   | C15H22ClNO2       | 284.14118   | 10.68    |                     |

**Table S4** Isobars, their exact  $m/z$  and UHPLC retention time.

| Pesticide              | Molecular formula | Exact $m/z$ | $m/z$<br>difference in<br>ppm | Rt (min) | Rt Difference<br>(min) |
|------------------------|-------------------|-------------|-------------------------------|----------|------------------------|
| Maleic Hydrazide       | C4H4N2O2          | 135.0165    | 204.1                         | 2.74     | 1.35                   |
| Phthalide              | C8H6O2            | 135.04406   |                               |          |                        |
| Dazomet                | C5H10N2S2         | 163.03582   | 108.9                         | 3.49     | 0.6                    |
| Methomyl               | C5H10N2O2S        | 163.05357   |                               |          |                        |
| Cymoxanil              | C7H10N4O3         | 199.08257   | 57.8                          | 4.69     | 0.8                    |
| Metaldehyde            | C8H16O4           | 199.09408   |                               |          |                        |
| Carbaryl               | C12H11NO2         | 202.08626   | 4.3                           | 6.6      | 0.41                   |
| Simazine               | C7H12ClN5         | 202.0854    |                               |          |                        |
| Chlorotoluron          | C10H13ClN2O       | 213.07892   | 37.7                          | 7.32     | 1.61                   |
| Phorate oxon           | C7H17O3PS         | 213.07088   |                               |          |                        |
| Aminocyclopyrachlor    | C8H8ClN3O2        | 214.03778   | 37.6                          | 3.01     | 0.09                   |
| Dimethoate oxon        | C5H12NO4PS        | 214.02974   |                               |          |                        |
| Ethoxyquin             | C14H19NO          | 218.15394   | 230.6                         | 7.66     | 4.48                   |
| Pymetrozine            | C10H11N5O         | 218.10364   |                               |          |                        |
| Acetamiprid            | C10H11ClN4        | 223.0745    | 0.896                         | 4.31     | 1.04                   |
| Aldicarb sulfone       | C7H14N2O4S        | 223.0747    |                               |          |                        |
| Monocrotophos          | C7H14NO5P         | 224.06824   | 136.8                         | 3.61     | 2.15                   |
| Probenazole            | C10H9NO3S         | 224.03759   |                               |          |                        |
| Fonophos               | C10H15OPS2        | 247.03747   | 61.8                          | 11.0     | 7.64                   |
| Oxydemeton-methyl      | C6H15O4PS2        | 247.02221   |                               |          |                        |
| Difenzoquat            | C17H17N2          | 249.13863   | 230.8                         | 4.13     | 1.26                   |
| Matrine                | C15H24N2O         | 249.19614   |                               |          |                        |
| Hexazinone             | C12H20N4O2        | 253.1659    | 232.6                         | 6.12     | 1.73                   |
| Trinexapac-ethyl       | C13H16O5          | 253.10705   |                               |          |                        |
| Phosfolan              | C7H14NO3PS2       | 256.02255   | 25.4                          | 4.97     | 4.35                   |
| Propyzamide            | C12H11Cl2NO       | 256.02905   |                               |          |                        |
| Methiocarb sulfone     | C11H15NO4S        | 258.07946   | 31.3                          | 4.45     | 6.97                   |
| Thiobencarb            | C12H16ClNOS       | 258.07139   |                               |          |                        |
| Phorate oxon sulfoxide | C7H17O4PS2        | 261.03786   | 68.0                          | 4.11     | 7.25                   |
| Phorate                | C7H17O2PS3        | 261.0201    |                               |          |                        |
| Bentazone              | C10H12N2O3S       | 263.04608   | 110.0                         | 5.66     | 1.49                   |
| Demeton S sulfone      | C6H15O5PS2        | 263.01713   |                               |          |                        |
| Diethofencarb          | C14H21NO4         | 268.15433   | 133.3                         | 8.7      | 1.7                    |
| Silthiofam             | C13H21NOSSi       | 268.11859   |                               |          |                        |
| Alachlor               | C14H20ClNO2       | 270.12553   | 86.4                          | 9.86     | 0.24                   |
| Mepronil               | C17H19NO2         | 270.14886   |                               |          |                        |
| Phorate oxon sulfone   | C7H17O5PS2        | 277.03278   | 64.1                          | 7.1      | 0.06                   |

| <b>Pesticide</b>     | <b>Molecular formula</b> | <b>Exact m/z</b> | <b>m/z<br/>difference in<br/>ppm</b> | <b>Rt (min)</b> | <b>Rt Difference<br/>(min)</b> |
|----------------------|--------------------------|------------------|--------------------------------------|-----------------|--------------------------------|
| Phorate sulfoxide    | C7H17O3PS3               | 277.01502        |                                      | 7.04            |                                |
| Fosthiazate          | C9H18NO3PS2              | 284.05385        | 62.4                                 | 6.83            | 3.9                            |
| Penconazole          | C13H15Cl2N3              | 284.07158        |                                      | 10.76           |                                |
| Myclobutanil         | C15H17ClN4               | 289.12145        | 38.8                                 | 9.48            | 1.8                            |
| Pyrisoxazole         | C16H17ClN2O              | 289.11022        |                                      | 7.68            |                                |
| Disulfoton-sulfoxide | C8H19O3PS3               | 291.03067        | 141.8                                | 7.03            | 2.37                           |
| Isoprothiolane       | C12H18O4S2               | 291.07193        |                                      | 9.40            |                                |
| Parathion            | C10H14NO5PS              | 292.04031        | 47.1                                 | 10.71           | 10.23                          |
| Thiamethoxam         | C8H10ClN5O3S             | 292.02656        |                                      | 3.48            |                                |
| Amitraz              | C19H23N3                 | 294.19647        | 202.9                                | 14.01           | 4.94                           |
| Paclobutrazol        | C15H20ClN3O              | 294.13677        |                                      | 9.07            |                                |
| Butralin             | C14H21N3O4               | 296.16048        | 150.1                                | 13.57           | 3.95                           |
| Triadimenol          | C14H18ClN3O2             | 296.11603        |                                      | 9.62            |                                |
| Bifenazate           | C17H20N2O3               | 301.15467        | 120.8                                | 9.68            | 0.99                           |
| Desmedipham          | C16H16N2O4               | 301.11828        |                                      | 8.69            |                                |
| Buprofezin           | C16H23N3OS               | 306.16346        | 60.8                                 | 12.54           | 8.05                           |
| Imazamox             | C15H19N3O4               | 306.14483        |                                      | 4.49            |                                |
| Diflubenzuron        | C14H9ClF2N2O2            | 311.03934        | 22.4                                 | 10.88           | 0.06                           |
| Edifenphos           | C14H15O2PS2              | 311.03238        |                                      | 10.94           |                                |
| Fenamidone           | C17H17N3OS               | 312.11651        | 56.9                                 | 8.73            | 2.34                           |
| Imazaquin            | C17H17N3O3               | 312.13427        |                                      | 6.39            |                                |
| Hexaconazole         | C14H17Cl2N3O             | 314.08214        | 31.4                                 | 11.23           | 1.33                           |
| Triazophos           | C12H16N3O3PS             | 314.07228        |                                      | 9.9             |                                |
| Azinphos-methyl      | C10H12N3O3PS2            | 318.01305        | 35.3                                 | 8.44            | 0.13                           |
| Phosmet              | C11H12NO4PS2             | 318.00181        |                                      | 8.57            |                                |
| Phenthoate           | C12H17O4PS2              | 321.03786        | 10.5                                 | 10.69           | 2.2                            |
| Terbufos sulfone     | C9H21O4PS3               | 321.04123        |                                      | 8.49            |                                |
| Diniconazole         | C15H17Cl2N3O             | 326.08214        | 93.1                                 | 11.76           | 7.7                            |
| Flumetsulam          | C12H9F2N5O2S             | 326.05178        |                                      | 4.06            |                                |
| Benalaxyl            | C20H23NO3                | 326.17507        | 10.3                                 | 10.91           | 1.29                           |
| Cycloxydim           | C17H27NO3S               | 326.17844        |                                      | 12.2            |                                |
| Fenoxanil            | C15H18Cl2N2O2            | 329.08181        | 174.2                                | 10.27           | 4.82                           |
| Sulcotrione          | C14H13ClO5S              | 329.0245         |                                      | 5.45            |                                |
| Epoxiconazole        | C17H13ClFN3O             | 330.08039        | 120.3                                | 10.46           | 0.11                           |
| Iprodione            | C13H13Cl2N3O3            | 330.04067        |                                      | 10.35           |                                |
| Fenarimol            | C17H12Cl2N2O             | 331.03994        | 10.3                                 | 9.89            | 0.45                           |
| Malathion            | C10H19O6PS2              | 331.04334        |                                      | 9.44            |                                |
| Isofenphos-methyl    | C14H22NO4PS              | 332.10799        | 147.2                                | 10.73           | 1.13                           |
| Sedaxane             | C18H19F2N3O              | 332.1569         |                                      | 9.6             |                                |

| Pesticide             | Molecular formula | Exact m/z | m/z<br>difference in<br>ppm | Rt (min) | Rt Difference<br>(min) |
|-----------------------|-------------------|-----------|-----------------------------|----------|------------------------|
| Flurtamone            | C18H14F3NO2       | 334.10494 | 188.9                       | 8.87     | 3.39                   |
| Ipconazole            | C18H24ClN3O       | 334.16807 |                             |          |                        |
| Diclofop-methyl       | C16H14Cl2O4       | 341.03419 | 32.9                        | 12.7     | 1.24                   |
| oxadiargyl            | C15H14Cl2N2O3     | 341.04542 |                             |          |                        |
| Boscalid              | C18H12Cl2N2O      | 343.03994 | 37.8                        | 9.09     | 2.89                   |
| Thiophanate-methyl    | C12H14N4O4S2      | 343.05292 |                             |          |                        |
| Oxadiazon             | C15H18Cl2N2O3     | 345.07672 | 37.8                        | 12.84    | 2.08                   |
| Quizalofop Acid       | C17H13ClN2O4      | 345.06366 |                             |          |                        |
| Florasulam            | C12H8f3N5O3S      | 360.03727 | 38.7                        | 5.04     | 2.56                   |
| Isoxaflutole          | C15H12F3NO4S      | 360.05119 |                             |          |                        |
| Clethodim             | C17H26ClNO3S      | 360.13947 | 104.1                       | 12.13    | 1.54                   |
| Etoxazole             | C21H23F2NO2       | 360.17696 |                             |          |                        |
| Isopyrazam            | C20H23F2N3O       | 360.1882  | 147.2                       | 11.8     | 1.0                    |
| Penthiopyrad          | C16H20F3N3OS      | 360.13519 |                             |          |                        |
| Benzoximate           | C18H18ClNO5       | 364.09463 | 57.4                        | 11.56    | 1.8                    |
| Flufenacet            | C14H13F4N3O2S     | 364.07374 |                             |          |                        |
| Haloxypop-methyl      | C16H13ClF3NO4     | 376.0558  | 47.1                        | 10.81    | 0.45                   |
| Prochloraz            | C15H16Cl3N3O2     | 376.03809 |                             |          |                        |
| Fluxapyroxad          | C18H12F5N3O       | 382.09733 | 41.2                        | 9.42     | 3.0                    |
| Metsulfuron-methyl    | C14H15N5O6S       | 382.08158 |                             |          |                        |
| Tolfenpyrad           | C21H22ClN3O2      | 384.14733 | 14.6                        | 12.47    | 0.54                   |
| Fluazifop-butyl       | C19H20F3NO4       | 384.14172 |                             |          |                        |
| Fipronil-desulfinyl   | C12H4Cl2F6N4      | 386.96444 | 63.9                        | 10.28    | 3.81                   |
| Sulfentrazone         | C11H10Cl2F2N4O3S  | 386.98915 |                             |          |                        |
| Dimethomorph          | C21H22ClNO4       | 388.13101 | 64.8                        | 9.28     | 2.25                   |
| Pyraclostrobin        | C19H18ClN3O4      | 388.10586 |                             |          |                        |
| Thiencarbazone-methyl | C12H14N4O7S2      | 391.03767 | 92.8                        | 5.48     | 7.27                   |
| Triclopyricarb        | C15H13Cl3N2O4     | 391.00137 |                             |          |                        |
| Flucarbazone          | C12H11F3N4O6S     | 397.04242 | 28.4                        | 4.84     | 4.86                   |
| Fluopyram             | C16H11ClF6N2O     | 397.05369 |                             |          |                        |
| Dufulin               | C19H22FN2O3PS     | 409.11455 | 54.8                        | 11.83    | 0.16                   |
| Trifloxystrobin       | C20H19F3N2O4      | 409.13697 |                             |          |                        |
| Bensulfuron-methyl    | C16H18N4O7S       | 411.0969  | 138.0                       | 8.67     | 0.13                   |
| Fentinacetate         | C20H18O2Sn        | 411.04015 |                             |          |                        |
| Nicosulfuron          | C15H18N6O6S       | 411.10813 | 10.5                        | 6.26     | 7.58                   |
| Spirodiclofen         | C21H24Cl2O4       | 411.11244 |                             |          |                        |
| Coumoxystrobin        | C26H28O6          | 437.19587 | 76.0                        | 13.12    | 1.15                   |
| Fenvalerate           | C25H22ClNO3       | 437.16265 |                             |          |                        |

**Table S5** The screening detection limit and recoveries for 403 pesticides at 5, 20, 50 µg/kg in asparagus bean, cucumber, chinese cabbage, and ginger.

| Pesticides                     | Asparagus bean         |         |                        |          |                            |          |                        | Cucumber               |         |                            |          |                        |          |                        | Chinese cabbage            |         |                            |          |                            |          |                            | Ginger                 |         |                        |          |                            |          |                        |
|--------------------------------|------------------------|---------|------------------------|----------|----------------------------|----------|------------------------|------------------------|---------|----------------------------|----------|------------------------|----------|------------------------|----------------------------|---------|----------------------------|----------|----------------------------|----------|----------------------------|------------------------|---------|------------------------|----------|----------------------------|----------|------------------------|
|                                | SD<br>L<br>(µg/<br>kg) | 5 µg/kg |                        | 20 µg/kg |                            | 50 µg/kg |                        | SD<br>L<br>(µg<br>/kg) | 5 µg/kg |                            | 20 µg/kg |                        | 50 µg/kg |                        | SD<br>L<br>(µ<br>g/k<br>g) | 5 µg/kg |                            | 20 µg/kg |                            | 50 µg/kg |                            | SD<br>L<br>(µg<br>/kg) | 5 µg/kg |                        | 20 µg/kg |                            | 50 µg/kg |                        |
|                                |                        | AV<br>E | RS<br>D,<br>%(n<br>=3) | AVE      | RS<br>D,<br>%<br>(n=<br>3) | AV<br>E  | RS<br>D,%<br>(n=3<br>) |                        | AVE     | RS<br>D,<br>%<br>(n=3<br>) | AVE      | RSD<br>,%<br>(n=3<br>) | AV<br>E  | RSD<br>,%<br>(n=3<br>) |                            | AVE     | RS<br>D,<br>%<br>(n=3<br>) | AVE      | RS<br>D,<br>%<br>(n=3<br>) | AV<br>E  | RS<br>D,<br>%<br>(n=3<br>) |                        | AVE     | RSD<br>,%<br>(n=3<br>) | AV<br>E  | RS<br>D,<br>%<br>(n=3<br>) | AVE      | RSD<br>,%<br>(n=3<br>) |
| 1-naphthylacetic acid          | 50                     | F       | F                      | F        | F                          | 68.0     | 3.7                    | 20                     | F       | F                          | 45.8     | 17.7                   | 71.7     | 35.4                   | 20                         | F       | F                          | 71.6     | 31.5                       | 109.1    | 26.1                       | 50                     | F       | F                      | F        | F                          | 40.0     | 6.3                    |
| 2,4-Dichlorophenoxyacetic acid | 50                     | F       | F                      | F        | F                          | 16.5     | 11.6                   | 50                     | F       | F                          | F        | F                      | 16.8     | 3.5                    | 10                         | F       | F                          | 13.4     | 33.6                       | 21.2     | 12.4                       | 20                     | F       | F                      | 6.3      | 27.5                       | 15.9     | 26.9                   |
| Acephate                       | 20                     | F       | F                      | 90.6     | 1.5                        | 78.7     | 3.3                    | 5                      | 105.7   | 1.0                        | 100.9    | 5.8                    | 92.3     | 2.1                    | 20                         | F       | F                          | 102.3    | 1.1                        | 86.0     | 4.4                        | 5                      | 102.1   | 4.3                    | 97.9     | 4.9                        | 91.8     | 1.4                    |
| Acetamiprid                    | 1                      | 108.7   | 9.4                    | 109.7    | 1.5                        | 99.0     | 3.3                    | 1                      | 123.9   | 0.8                        | 116.1    | 10.9                   | 105.4    | 6.8                    | 5                          | 108.7   | 2.0                        | 105.8    | 0.8                        | 96.5     | 0.3                        | 5                      | 119.7   | 3.8                    | 103.7    | 4.6                        | 102.1    | 2.6                    |
| Acetochlor                     | 20                     | F       | F                      | 92.0     | 5.1                        | 83.9     | 0.9                    | 20                     | F       | F                          | 100.6    | 2.7                    | 95.0     | 4.2                    | 20                         | F       | F                          | 91.7     | 2.7                        | 90.3     | 8.8                        | 20                     | F       | F                      | 90.4     | 3.5                        | 100.8    | 1.3                    |
| Acifluorfen                    | 20                     | F       | F                      | 13.4     | 14.4                       | 27.8     | 14.7                   | 5                      | 6.2     | F                          | 12.8     | 35.3                   | 20.7     | 31.4                   | 5                          | 12.3    | 60.4                       | 16.2     | 19.8                       | 32.7     | 22.2                       | 20                     | F       | F                      | 11.9     | 41.4                       | 32.1     | 27.5                   |
| Alachlor                       | 20                     | F       | F                      | 92.0     | 5.1                        | 83.9     | 0.9                    | 20                     | F       | F                          | 100.6    | 2.7                    | 95.0     | 4.2                    | 20                         | F       | F                          | 91.7     | 2.7                        | 90.3     | 8.8                        | 20                     | F       | F                      | 90.4     | 3.5                        | 100.8    | 1.3                    |
| Albendazole                    | 5                      | 53.3    | 4.1                    | 62.0     | 6.0                        | 60.0     | 3.3                    | 5                      | 28.5    | 6.6                        | 31.7     | 9.5                    | 51.1     | 3.9                    | 20                         | F       | F                          | 57.1     | 5.3                        | 54.3     | 4.2                        | 1                      | 110.1   | 1.6                    | 109.1    | 4.3                        | 103.3    | 3.4                    |

|                      |     |       |       |       |      |      |      |    |       |      |       |      |       |      |     |       |     |       |      |       |      |     |       |      |       |      |       |      |
|----------------------|-----|-------|-------|-------|------|------|------|----|-------|------|-------|------|-------|------|-----|-------|-----|-------|------|-------|------|-----|-------|------|-------|------|-------|------|
| Aldicarb sulfoxide   | 20  | F     | F     | 91.6  | 0.9  | 79.1 | 1.2  | 20 | F     | F    | 101.4 | 5.4  | 96.9  | 2.8  | 50  | F     | F   | F     | F    | 98.0  | 2.9  | 10  | F     | F    | 114.9 | 7.3  | 102.7 | 2.1  |
| Aldicarb             | 5   | 96.6  | 21.3  | 100.3 | 1.4  | 85.9 | 5.0  | 20 | F     | F    | 110.0 | 11.4 | 87.2  | 7.4  | 5   | 80.0  | 7.9 | 90.0  | 1.9  | 76.1  | 9.3  | 20  | F     | F    | 119.5 | 6.6  | 102.9 | 7.3  |
| Aldoxycarb           | 5   | 124.4 | 8.2   | 110.9 | 2.3  | 92.0 | 1.8  | 5  | 131.1 | 2.5  | 111.7 | 3.7  | 100.8 | 6.8  | 20  | F     | F   | 61.2  | 4.7  | 116.0 | 3.1  | 5   | 137.9 | 3.3  | 125.6 | 5.5  | 109.1 | 2.0  |
| Ametoctradin         | 1   | 87.0  | 1.4   | 81.6  | 5.6  | 77.9 | 3.3  | 5  | 114.4 | 1.5  | 95.2  | 0.3  | 92.2  | 6.6  | 5   | 117.9 | 2.4 | 92.1  | 0.4  | 87.9  | 1.9  | 5   | 96.8  | 1.2  | 90.3  | 2.1  | 87.5  | 2.1  |
| Ametryn              | 1   | 100.3 | 2.3   | 93.5  | 5.3  | 87.1 | 1.7  | 1  | 104.4 | 3.3  | 95.0  | 3.2  | 89.4  | 4.1  | 1   | 127.7 | 0.3 | 92.1  | 2.6  | 85.5  | 1.4  | 1   | 107.1 | 2.1  | 98.0  | 3.0  | 93.2  | 4.3  |
| Amidosulfuron        | 10  | F     | F     | 81.4  | 3.9  | 95.2 | 5.8  | 1  | 80.0  | 11.6 | 79.2  | 9.1  | 90.0  | 7.0  | 20  | F     | F   | 88.2  | 3.9  | 91.4  | 6.4  | 50  | F     | F    | F     | F    | 87.7  | 4.9  |
| Aminocyclopyra chlor | 100 | F     | F     | F     | F    | F    | F    | 50 | F     | F    | F     | F    | 0.7   | 75.4 | 100 | F     | F   | F     | F    | F     | F    | 100 | F     | F    | F     | F    | 1.0   | F    |
| Aminopyralid         | NA  | F     | F     | F     | F    | F    | F    | NA | F     | F    | F     | F    | F     | F    | NA  | F     | F   | F     | F    | F     | F    | NA  | F     | F    | F     | F    | F     | F    |
| Amisulbrom           | 50  | F     | F     | F     | F    | 23.1 | 9.3  | 20 | F     | F    | 28.2  | 13.4 | 47.3  | 50.9 | 50  | F     | F   | F     | F    | 80.1  | 18.5 | NA  | F     | F    | F     | F    | F     | F    |
| Amitraz              | 5   | 126.7 | 12.6  | 58.6  | 23.0 | 67.0 | 2.6  | 10 | F     | F    | 9.1   | 10.8 | 2.7   | 5.4  | 20  | F     | F   | 128.6 | 45.9 | 127.3 | 9.9  | 5   | 133.1 | 17.1 | 88.2  | 3.0  | 54.3  | 10.3 |
| Amitrole             | 5   | 8.1   | 100.9 | 9.1   | 80.6 | 3.2  | 19.2 | 5  | 10.7  | 31.1 | 3.8   | 7.6  | 3.7   | 38.6 | 20  | F     | F   | 6.3   | 29.8 | 7.4   | 24.1 | 5   | 36.4  | 19.3 | 10.7  | 17.9 | 10.2  | 33.5 |
| Anilazine            | 1   | 67.8  | 12.6  | 91.9  | 1.1  | 84.5 | 1.5  | 5  | 119.7 | 3.2  | 167.6 | 11.4 | 158.6 | 14.1 | 5   | 111.9 | 6.2 | 121.9 | 6.9  | 112.3 | 8.5  | 5   | 32.9  | 14.8 | 35.6  | 5.0  | 51.6  | 10.4 |
| Anilofos             | 1   | 103.7 | 6.4   | 98.1  | 3.3  | 89.2 | 2.5  | 1  | 116.6 | 1.1  | 106.2 | 4.0  | 99.1  | 6.4  | 1   | 103.8 | 2.1 | 106.3 | 4.0  | 94.8  | 3.1  | 5   | 117.4 | 1.1  | 117.6 | 5.4  | 114.7 | 1.9  |



|                        |         |           |          |           |          |           |          |        |           |          |           |          |           |      |         |           |           |           |          |           |          |         |           |     |           |      |           |          |
|------------------------|---------|-----------|----------|-----------|----------|-----------|----------|--------|-----------|----------|-----------|----------|-----------|------|---------|-----------|-----------|-----------|----------|-----------|----------|---------|-----------|-----|-----------|------|-----------|----------|
| Atrazine               | 5       | 11<br>1.7 | 0.8      | 101.<br>2 | 5.<br>7  | 92.<br>8  | 1.6      | 5      | 115.<br>1 | 2.3      | 101.<br>1 | 3.3      | 93.<br>2  | 1.6  | 5       | 155.<br>0 | 40.<br>0  | 103.<br>4 | 2.4      | 94.<br>7  | 0.4      | 5       | 116.<br>8 | 2.6 | 103.<br>3 | 3.5  | 95.7      | 4.3      |
| Avermectins            | 1       | 82.<br>0  | 10.<br>2 | 79.9      | 8.<br>2  | 71.<br>9  | 1.9      | 1      | 72.2      | 14.<br>5 | 82.4      | 1.6      | 84.<br>3  | 5.2  | 1       | 114.<br>4 | 46.<br>1  | 82.9      | 1.2      | 77.<br>8  | 5.9      | 1       | 91.8      | 5.1 | 95.0      | 11.3 | 108.<br>4 | 7.8      |
| Azadirachtin           | 20      | F         | F        | 2.0       | 15<br>.0 | 6.2       | 43.<br>5 | N<br>A | F         | F        | F         | F        | 0.3       | 76.0 | 5       | 7.6       | 10<br>1.1 | 13.7      | 35.<br>3 | 9.7       | 26.<br>4 | 50      | F         | F   | F         | F    | 95.4      | 3.3      |
| Azinphos-<br>methyl    | 5       | 84.<br>8  | 7.9      | 74.3      | 8.<br>4  | 64.<br>1  | 5.0      | 10     | F         | F        | 103.<br>6 | 4.6      | 95.<br>9  | 0.8  | 10<br>0 | F         | F         | F         | F        | F         | F        | 20      | F         | F   | 115.<br>2 | 3.3  | 107.<br>3 | 0.8      |
| Azocyclotin            | 50      | F         | F        | F         | F        | 205<br>.1 | 5.5      | 50     | F         | F        | F         | F        | 29.<br>9  | 36.7 | 50      | F         | F         | F         | F        | 120<br>.0 | 2.8      | 50      | F         | F   | F         | F    | 46.1      | 26.<br>1 |
| Azoxystrobin           | 1       | 10<br>3.8 | 5.7      | 94.1      | 2.<br>7  | 84.<br>7  | 1.7      | 1      | 102.<br>6 | 1.3      | 98.1      | 3.5      | 89.<br>6  | 1.2  | 1       | 97.7      | 1.9       | 94.4      | 1.7      | 87.<br>3  | 4.5      | 5       | 109.<br>6 | 9.3 | 115.<br>5 | 2.3  | 109.<br>6 | 5.1      |
| Benalaxyl              | 1       | 10<br>6.6 | 7.6      | 112.<br>4 | 1.<br>5  | 99.<br>7  | 3.5      | 1      | 116.<br>8 | 0.2      | 114.<br>6 | 6.4      | 111<br>.2 | 3.2  | 1       | 103.<br>8 | 3.9       | 109.<br>3 | 3.2      | 100<br>.9 | 2.1      | 1       | 116.<br>3 | 4.5 | 115.<br>6 | 8.6  | 107.<br>6 | 1.3      |
| Benazolin              | NA      | F         | F        | F         | F        | F         | F        | N<br>A | F         | F        | F         | F        | F         | F    | N<br>A  | F         | F         | F         | F        | F         | F        | N<br>A  | F         | F   | F         | F    | F         | F        |
| Benfuracarb            | 10<br>0 | F         | F        | F         | F        | F         | F        | 20     | F         | F        | F         | F        | F         | F    | N<br>A  | F         | F         | F         | F        | F         | F        | 10<br>0 | F         | F   | F         | F    | F         | F        |
| Bensulfuron-<br>methyl | 5       | 11<br>0.9 | 2.5      | 118.<br>1 | 1.<br>5  | 111<br>.8 | 3.8      | 5      | 111.<br>9 | 2.5      | 106.<br>9 | 8.8      | 107<br>.4 | 3.5  | 5       | 95.4      | 2.8       | 96.2      | 3.1      | 92.<br>2  | 1.1      | 5       | 91.8      | 6.2 | 98.4      | 7.0  | 97.2      | 0.6      |
| Bentazone              | 1       | 12<br>0.1 | 7.0      | 114.<br>7 | 2.<br>3  | 98.<br>9  | 3.5      | 1      | 118.<br>3 | 9.8      | 114.<br>0 | 9.7      | 103<br>.7 | 3.2  | 1       | 126.<br>5 | 6.7       | 132.<br>9 | 4.3      | 112<br>.0 | 3.9      | 1       | 104.<br>8 | 6.8 | 109.<br>5 | 10.4 | 110.<br>9 | 1.3      |
| Benziothiazolino<br>ne | 20      | F         | F        | 77.6      | 3.<br>3  | 55.<br>5  | 7.0      | 1      | 96.3      | 4.6      | 76.6      | 10.<br>7 | 72.<br>8  | 11.4 | 50      | F         | F         | F         | F        | 77.<br>1  | 1.0      | 10      | F         | F   | 90.9      | 5.8  | 83.4      | 2.3      |
| Benzovindiflupy<br>r   | 1       | 11<br>0.4 | 8.0      | 116.<br>3 | 1.<br>2  | 104<br>.8 | 3.5      | 1      | 116.<br>4 | 1.4      | 115.<br>3 | 8.5      | 106<br>.1 | 4.2  | 1       | 101.<br>9 | 5.3       | 108.<br>4 | 4.0      | 101<br>.2 | 1.8      | 1       | 82.4      | 4.7 | 99.3      | 7.2  | 98.9      | 1.7      |

|                   |     |       |      |       |      |       |     |     |       |      |       |      |       |      |     |       |      |       |      |       |      |    |       |      |       |      |       |      |
|-------------------|-----|-------|------|-------|------|-------|-----|-----|-------|------|-------|------|-------|------|-----|-------|------|-------|------|-------|------|----|-------|------|-------|------|-------|------|
| Benzoximate       | 20  | F     | F    | 104.3 | 8.1  | 88.8  | 0.1 | 20  | F     | F    | 17.5  | 10.4 | 107.5 | 4.8  | 20  | F     | F    | 113.1 | 3.6  | 103.7 | 3.0  | 50 | F     | F    | F     | F    | 105.4 | 3.5  |
| Bifenazate        | 100 | F     | F    | F     | F    | F     | F   | 100 | F     | F    | F     | F    | F     | F    | 50  | F     | F    | F     | F    | 23.1  | 18.5 | 5  | F     | F    | 6.3   | 20.2 | 24.9  | 32.9 |
| Bifenox           | 5   | F     | F    | F     | F    | F     | F   | 5   | 118.2 | 16.6 | 113.8 | 0.9  | 100.2 | 5.9  | 20  | F     | F    | F     | F    | 73.9  | 6.5  | 5  | 113.8 | 5.6  | 44.5  | 63.8 | 109.0 | 13.1 |
| Bifenthrin        | 20  | F     | F    | 77.7  | 15.3 | 78.2  | 7.0 | 50  | F     | F    | F     | F    | 89.7  | 6.3  | 20  | F     | F    | 84.8  | 13.2 | 97.6  | 5.8  | 50 | F     | F    | F     | F    | 83.6  | 7.9  |
| Bispyribac-sodium | 50  | F     | F    | F     | F    | 20.8  | 6.9 | 50  | F     | F    | F     | F    | 31.0  | 13.0 | 100 | F     | F    | F     | F    | F     | F    | 50 | F     | F    | F     | F    | 23.3  | 34.0 |
| Bitertanol        | 5   | 72.3  | 5.5  | 87.5  | 6.1  | 77.6  | 0.6 | 20  | F     | F    | 92.5  | 0.4  | 88.9  | 3.4  | 20  | F     | F    | 98.1  | 3.2  | 89.1  | 1.4  | 10 | F     | F    | 114.7 | 6.3  | 100.5 | 1.2  |
| Boscalid          | 20  | F     | F    | 89.9  | 8.9  | 81.1  | 9.5 | 20  | F     | F    | 113.3 | 3.6  | 105.7 | 1.7  | 20  | F     | F    | 111.8 | 3.6  | 101.9 | 1.9  | 5  | 101.6 | 4.4  | 102.5 | 5.9  | 100.9 | 2.1  |
| Bromoxyni         | 1   | 44.8  | 18.0 | 43.4  | 5.6  | 57.2  | 6.2 | 1   | 40.5  | 11.5 | 42.1  | 15.1 | 49.9  | 13.9 | 1   | 41.6  | 13.7 | 49.9  | 5.4  | 62.8  | 6.5  | 1  | 27.9  | 13.5 | 41.1  | 22.9 | 63.2  | 15.4 |
| Bupirimate        | 1   | 101.8 | 2.5  | 94.4  | 5.3  | 90.5  | 3.4 | 1   | 108.8 | 0.3  | 96.7  | 3.3  | 91.5  | 4.6  | 1   | 109.4 | 0.7  | 101.4 | 0.9  | 91.6  | 1.1  | 5  | 118.6 | 3.8  | 101.7 | 1.3  | 95.8  | 2.3  |
| Buprofezin        | 1   | 83.4  | 4.5  | 83.2  | 5.6  | 77.9  | 0.4 | 1   | 107.1 | 0.6  | 98.6  | 0.7  | 96.0  | 4.3  | 1   | 87.2  | 3.5  | 83.3  | 3.9  | 80.4  | 3.1  | 5  | 101.8 | 2.4  | 94.8  | 4.4  | 90.4  | 1.5  |
| Butachlor         | 5   | 56.1  | 18.2 | 67.0  | 10.8 | 74.3  | 2.5 | 5   | 69.7  | 12.6 | 71.7  | 10.1 | 75.0  | 5.7  | 5   | 66.2  | 11.8 | 80.2  | 1.2  | 82.3  | 2.3  | 5  | 103.2 | 7.6  | 98.4  | 1.9  | 99.1  | 4.5  |
| Butralin          | 1   | 83.7  | 6.7  | 81.3  | 1.5  | 80.7  | 3.1 | 5   | 88.6  | 2.3  | 83.1  | 2.2  | 85.3  | 3.9  | 5   | 92.4  | 0.5  | 88.3  | 3.1  | 87.4  | 8.5  | 1  | 98.3  | 5.8  | 88.7  | 6.8  | 91.1  | 3.1  |
| Cadusafos         | 1   | 105.5 | 5.6  | 111.9 | 2.7  | 102.7 | 1.8 | 1   | 110.1 | 0.6  | 112.3 | 7.3  | 102.7 | 2.9  | 5   | 110.4 | 2.7  | 113.2 | 3.8  | 101.1 | 0.6  | 1  | 100.9 | 3.3  | 98.2  | 8.2  | 99.6  | 1.5  |

|                     |         |           |     |           |          |           |          |    |           |     |           |          |           |     |    |           |          |           |          |           |          |    |           |          |           |      |           |          |
|---------------------|---------|-----------|-----|-----------|----------|-----------|----------|----|-----------|-----|-----------|----------|-----------|-----|----|-----------|----------|-----------|----------|-----------|----------|----|-----------|----------|-----------|------|-----------|----------|
| Captan              | NA      | F         | F   | F         | F        | F         | F        | NA | F         | F   | F         | F        | F         | F   | NA | F         | F        | F         | F        | F         | F        | NA | F         | F        | F         | F    | F         |          |
| Carbaryl            | 1       | 10<br>7.8 | 4.0 | 100.<br>4 | 0.<br>5  | 88.<br>8  | 0.7      | 5  | 118.<br>8 | 3.6 | 102.<br>6 | 6.0      | 95.<br>4  | 2.3 | 5  | 108.<br>1 | 3.1      | 97.2      | 2.2      | 86.<br>7  | 4.1      | 1  | 129.<br>5 | 4.6      | 124.<br>4 | 5.0  | 115.<br>6 | 5.4      |
| Carbendazim         | 5       | 10<br>4.9 | 3.3 | 96.0      | 2.<br>9  | 88.<br>3  | 1.6      | 1  | 111.<br>6 | 4.0 | 106.<br>3 | 5.2      | 114<br>.5 | 3.8 | 1  | 96.5      | 1.7      | 89.7      | 3.1      | 79.<br>1  | 1.0      | 1  | 109.<br>9 | 2.2      | 99.3      | 2.2  | 93.4      | 2.3      |
| Carbofuran          | 5       | 11<br>9.7 | 8.2 | 106.<br>5 | 11<br>.1 | 82.<br>6  | 15.<br>3 | 5  | 121.<br>4 | 0.9 | 98.4      | 18.<br>9 | 107<br>.9 | 8.8 | 20 | F         | F        | 106.<br>2 | 0.8      | 76.<br>3  | 17.<br>9 | 5  | 119.<br>8 | 1.5      | 141.<br>5 | 7.7  | 102.<br>8 | 1.8      |
| Carbofuran          | 1       | 12<br>6.8 | 8.3 | 119.<br>2 | 4.<br>1  | 106<br>.0 | 1.9      | 1  | 167.<br>3 | 4.7 | 140.<br>4 | 5.2      | 127<br>.9 | 4.3 | 1  | 111.<br>4 | 2.0      | 106.<br>8 | 4.0      | 94.<br>0  | 5.4      | 1  | 145.<br>4 | 4.3      | 136.<br>8 | 2.9  | 128.<br>4 | 0.7      |
| Carbosulfan         | 10      | F         | F   | 16.1      | 30<br>.1 | 9.2       | 7.2      | 5  | 26.8      | 1.2 | 15.2      | 88.<br>8 | 12.<br>9  | 1.5 | NA | F         | F        | F         | F        | F         | F        | 5  | 21.0      | 19.<br>3 | 40.8      | 26.5 | 18.8      | 92.<br>1 |
| Carboxin            | 5       | 48.<br>7  | 3.8 | 41.8      | 7.<br>5  | 48.<br>1  | 11.<br>1 | 5  | 23.1      | 0.2 | 20.5      | 6.3      | 30.<br>7  | 7.1 | 5  | 78.9      | 51.<br>0 | 61.6      | 5.4      | 50.<br>1  | 5.1      | 1  | 115.<br>1 | 0.6      | 104.<br>4 | 0.7  | 96.9      | 1.1      |
| Carfentrazone-ethyl | 1       | 12<br>4.7 | 5.1 | 127.<br>2 | 1.<br>9  | 111<br>.0 | 2.4      | 1  | 125.<br>9 | 1.1 | 122.<br>6 | 7.3      | 109<br>.9 | 3.2 | 1  | 119.<br>8 | 4.3      | 121.<br>8 | 6.5      | 107<br>.9 | 2.8      | 10 | F         | F        | 110.<br>5 | 11.0 | 108.<br>7 | 4.6      |
| Cartap              | 10<br>0 | F         | F   | F         | F        | F         | F        | 50 | F         | F   | F         | F        | 29.<br>0  | 7.4 | 50 | F         | F        | F         | F        | 51.<br>4  | 5.9      | 50 | F         | F        | F         | F    | 94.4      | 3.1      |
| Chlorantraniliprole | 5       | 10<br>9.2 | 2.5 | 105.<br>2 | 2.<br>8  | 90.<br>9  | 2.2      | 10 | F         | F   | 99.9      | 2.2      | 91.<br>0  | 2.9 | 50 | F         | F        | F         | F        | 88.<br>3  | 2.1      | 5  | 135.<br>8 | 1.1      | 127.<br>6 | 3.3  | 113.<br>1 | 3.9      |
| Chlorbenzuron       | 20      | F         | F   | 86.3      | 24<br>.8 | 84.<br>9  | 1.6      | 50 | F         | F   | F         | F        | 69.<br>8  | 0.2 | 20 | F         | F        | 65.5      | 34.<br>1 | 76.<br>8  | 7.1      | 10 | F         | F        | 105.<br>4 | 12.1 | 103.<br>3 | 5.6      |
| Chlordimeform       | 1       | 71.<br>5  | 3.2 | 77.6      | 1.<br>3  | 79.<br>5  | 0.8      | 1  | 87.0      | 2.7 | 83.5      | 1.9      | 86.<br>2  | 4.4 | 1  | 83.7      | 1.2      | 70.6      | 6.1      | 72.<br>7  | 1.8      | 1  | 67.9      | 2.0      | 78.2      | 4.8  | 81.9      | 3.2      |
| Chlorfenapyr        | NA      | F         | F   | F         | F        | F         | F        | NA | F         | F   | F         | F        | F         | F   | NA | F         | F        | F         | F        | F         | F        | NA | F         | F        | F         | F    | F         | F        |

|                      |    |           |          |           |          |           |          |        |           |          |           |          |           |      |        |           |          |           |          |           |          |    |           |          |           |      |           |          |   |
|----------------------|----|-----------|----------|-----------|----------|-----------|----------|--------|-----------|----------|-----------|----------|-----------|------|--------|-----------|----------|-----------|----------|-----------|----------|----|-----------|----------|-----------|------|-----------|----------|---|
| Chlorfluazuron       | 5  | 10<br>2.9 | 11.<br>0 | 109.<br>5 | 12<br>.9 | 91.<br>1  | 12.<br>6 | 20     | F         | F        | 91.7      | 3.4      | 84.<br>0  | 2.1  | 20     | F         | F        | 97.6      | 4.9      | 86.<br>5  | 4.8      | 5  | 99.8      | 7.6      | 103.<br>9 | 8.5  | 94.4      | 4.4      |   |
| Chlorimuron-ethyl    | 5  | 67.<br>3  | 11.<br>3 | 83.6      | 7.<br>2  | 82.<br>9  | 2.3      | 20     | F         | F        | 87.1      | 12.<br>1 | 90.<br>8  | 9.8  | 50     | F         | F        | F         | F        | 100<br>.6 | 4.3      | 20 | F         | F        | 71.3      | 13.2 | 93.7      | 6.0      |   |
| Chlorotoluron        | 5  | 11<br>4.0 | 2.6      | 107.<br>7 | 3.<br>2  | 93.<br>4  | 0.8      | 1      | 117.<br>8 | 0.6      | 106.<br>0 | 2.6      | 96.<br>0  | 1.5  | 5      | 111.<br>8 | 1.0      | 107.<br>8 | 0.4      | 92.<br>3  | 3.1      | 5  | 132.<br>2 | 0.8      | 119.<br>6 | 2.1  | 113.<br>6 | 1.9      |   |
| Chlorpyrifos oxon    | NA | F         | F        | F         | F        | F         | F        | N<br>A | F         | F        | F         | F        | F         | F    | N<br>A | F         | F        | F         | F        | F         | F        | F  | N<br>A    | F        | F         | F    | F         | F        | F |
| Chlorpyrifos-methyl  | 50 | F         | F        | F         | F        | 78.<br>1  | 3.4      | 50     | F         | F        | F         | F        | 74.<br>4  | 4.7  | 20     | F         | F        | 71.1      | 10.<br>1 | 79.<br>6  | 11.<br>6 | 20 | F         | F        | 33.4      | 52.7 | 75.5      | 3.1      |   |
| Chlorpyrifos         | 5  | 82.<br>0  | 5.0      | 104.<br>5 | 6.<br>8  | 93.<br>8  | 6.1      | 5      | 73.8      | 1.5      | 93.6      | 8.7      | 92.<br>1  | 12.4 | 5      | 82.6      | 3.5      | 94.0      | 9.0      | 90.<br>2  | 3.3      | 5  | 93.1      | 13.<br>0 | 90.5      | 2.7  | 86.7      | 5.0      |   |
| Chlorsulfuron        | 5  | 48.<br>8  | 20.<br>8 | 58.9      | 3.<br>6  | 69.<br>5  | 6.5      | 20     | F         | F        | 58.4      | 1.5      | 65.<br>8  | 8.4  | 20     | F         | F        | 74.6      | 8.5      | 76.<br>4  | 4.4      | 50 | F         | F        | F         | F    | 71.3      | 12.<br>1 |   |
| Cinosulfuron         | 5  | 82.<br>8  | 2.6      | 87.3      | 4.<br>3  | 85.<br>9  | 2.0      | 20     | F         | F        | 90.9      | 5.3      | 92.<br>7  | 9.0  | 20     | F         | F        | 99.0      | 3.2      | 93.<br>2  | 6.8      | 20 | F         | F        | 80.7      | 4.9  | 91.9      | 8.1      |   |
| ClethodiM Sulfone    | 5  | 12<br>2.7 | 5.7      | 114.<br>3 | 4.<br>0  | 109<br>.0 | 2.3      | 5      | 136.<br>1 | 4.1      | 116.<br>7 | 7.9      | 108<br>.6 | 8.8  | 5      | 115.<br>7 | 3.6      | 118.<br>3 | 10.<br>3 | 107<br>.7 | 4.6      | 5  | 114.<br>5 | 2.4      | 111.<br>0 | 2.9  | 107.<br>6 | 2.8      |   |
| ClethodiMSulfoxide   | 1  | 15<br>1.9 | 4.4      | 140.<br>9 | 3.<br>7  | 115<br>.7 | 1.3      | 1      | 192.<br>8 | 4.5      | 170.<br>6 | 5.7      | 142<br>.5 | 7.0  | 1      | 189.<br>6 | 36.<br>2 | 134.<br>7 | 11.<br>2 | 109<br>.1 | 5.1      | 5  | 90.6      | 2.4      | 87.4      | 1.9  | 86.7      | 3.5      |   |
| Clethodim            | 5  | 27.<br>8  | 5.2      | 30.2      | 7.<br>9  | 54.<br>6  | 2.4      | 5      | 3.7       | 21.<br>4 | 5.9       | 12.<br>8 | 31.<br>1  | 4.8  | 5      | 47.3      | 54.<br>9 | 50.2      | 8.8      | 65.<br>7  | 5.2      | 5  | 96.4      | 2.4      | 93.6      | 1.7  | 91.1      | 1.7      |   |
| Clodinafop-propargyl | 1  | 14<br>0.2 | 2.6      | 125.<br>3 | 4.<br>5  | 105<br>.2 | 2.9      | 1      | 138.<br>2 | 1.5      | 124.<br>8 | 2.5      | 104<br>.0 | 2.0  | 1      | 139.<br>4 | 1.0      | 128.<br>8 | 4.5      | 105<br>.8 | 0.8      | 20 | F         | F        | 123.<br>1 | 7.3  | 111.<br>5 | 2.2      |   |
| Clofentezine         | 20 | F         | F        | 93.4      | 10<br>.0 | 79.<br>0  | 4.3      | 50     | F         | F        | F         | F        | 82.<br>2  | 8.6  | 20     | F         | F        | 75.9      | 9.1      | 74.<br>3  | 2.9      | 50 | F         | F        | F         | F    | 85.6      | 4.7      |   |

|                  |    |           |     |           |         |           |     |        |           |          |           |          |           |      |        |           |          |           |          |          |          |         |           |     |           |      |           |     |
|------------------|----|-----------|-----|-----------|---------|-----------|-----|--------|-----------|----------|-----------|----------|-----------|------|--------|-----------|----------|-----------|----------|----------|----------|---------|-----------|-----|-----------|------|-----------|-----|
| Clomazone        | 1  | 10<br>5.0 | 0.4 | 99.6      | 4.<br>1 | 94.<br>5  | 2.8 | 1      | 109.<br>5 | 0.6      | 99.5      | 0.8      | 93.<br>9  | 2.8  | 1      | 118.<br>8 | 4.8      | 85.4      | 2.8      | 79.<br>6 | 2.1      | 1       | 109.<br>7 | 1.4 | 101.<br>7 | 2.3  | 95.1      | 2.6 |
| Clopyralid       | NA | F         | F   | F         | F       | F         | F   | N<br>A | F         | F        | F         | F        | F         | F    | N<br>A | F         | F        | F         | F        | F        | F        | N<br>A  | F         | F   | F         | F    | F         | F   |
| Clothianidin     | 5  | 98.<br>4  | 3.7 | 96.3      | 0.<br>7 | 91.<br>0  | 3.8 | 5      | 116.<br>8 | 2.5      | 103.<br>4 | 6.0      | 98.<br>9  | 6.6  | 10     | F         | F        | 89.2      | 2.7      | 79.<br>9 | 3.9      | 5       | 116.<br>2 | 2.1 | 102.<br>8 | 1.7  | 92.2      | 3.0 |
| Clotrimazole     | 50 | F         | F   | F         | F       | 91.<br>9  | 4.8 | 10     | F         | F        | 66.0      | 65.<br>2 | 70.<br>6  | 38.9 | 20     | F         | F        | 67.6      | 26.<br>9 | 73.<br>4 | 10.<br>3 | 20      | F         | F   | 87.3      | 15.8 | 92.9      | 9.9 |
| Coumaphos        | 5  | 85.<br>1  | 8.7 | 86.0      | 5.<br>0 | 76.<br>2  | 2.7 | 5      | 99.4      | 0.9      | 98.1      | 2.0      | 93.<br>3  | 6.3  | 5      | 94.2      | 6.0      | 103.<br>9 | 3.0      | 92.<br>5 | 2.2      | 5       | 114.<br>4 | 4.1 | 108.<br>7 | 5.1  | 104.<br>6 | 3.4 |
| Coumoxystrobin   | 5  | 10<br>7.2 | 3.6 | 121.<br>0 | 3.<br>3 | 107<br>.4 | 1.6 | 5      | 105.<br>2 | 1.4      | 106.<br>1 | 3.9      | 96.<br>9  | 8.0  | 5      | 99.3      | 5.3      | 100.<br>8 | 5.8      | 97.<br>3 | 2.5      | 1       | 113.<br>5 | 3.2 | 104.<br>6 | 1.3  | 99.6      | 2.0 |
| Cyanazine        | 5  | 95.<br>8  | 7.4 | 93.4      | 2.<br>5 | 83.<br>4  | 2.0 | 5      | 113.<br>5 | 2.1      | 103.<br>6 | 3.1      | 92.<br>4  | 5.1  | 5      | 100.<br>6 | 4.6      | 96.7      | 2.6      | 89.<br>3 | 1.6      | 5       | 116.<br>3 | 3.4 | 108.<br>6 | 4.3  | 102.<br>6 | 1.2 |
| Cyantraniliprole | 50 | F         | F   | F         | F       | 86.<br>6  | 5.7 | 50     | F         | F        | F         | F        | 83.<br>5  | 1.9  | 50     | F         | F        | F         | F        | 89.<br>6 | 5.8      | 5       | 104.<br>4 | 1.7 | 109.<br>2 | 8.3  | 102.<br>4 | 3.7 |
| Cyclosulfamuron  | 5  | 10<br>4.3 | 0.5 | 101.<br>4 | 6.<br>4 | 99.<br>2  | 4.3 | 5      | 101.<br>5 | 4.7      | 97.1      | 7.7      | 94.<br>4  | 9.6  | 5      | 102.<br>1 | 2.2      | 106.<br>4 | 3.2      | 97.<br>1 | 5.3      | 5       | 94.0      | 6.1 | 94.3      | 6.4  | 98.9      | 4.2 |
| Cycloxydim       | 5  | 18.<br>5  | 4.2 | 21.2      | 8.<br>2 | 43.<br>4  | 4.5 | 5      | 3.5       | 14.<br>1 | 3.8       | 9.0      | 20.<br>1  | 14.9 | 5      | 35.1      | 57.<br>0 | 38.4      | 11.<br>5 | 59.<br>1 | 3.7      | 5       | 89.9      | 5.4 | 88.6      | 1.7  | 89.2      | 0.3 |
| Cyflumetofen     | 1  | 10<br>4.2 | 9.9 | 112.<br>8 | 7.<br>4 | 102<br>.0 | 3.4 | 1      | 110.<br>7 | 2.7      | 113.<br>9 | 5.7      | 106<br>.0 | 4.1  | 1      | 90.9      | 7.2      | 92.8      | 0.5      | 91.<br>4 | 3.7      | 1       | 112.<br>1 | 5.9 | 110.<br>0 | 7.3  | 105.<br>6 | 1.6 |
| Cyhalothrin      | 50 | F         | F   | F         | F       | 87.<br>1  | 4.7 | 5      | 79.7      | 8.9      | 98.6      | 10.<br>4 | 104<br>.5 | 5.4  | 20     | F         | F        | 98.1      | 6.7      | 95.<br>6 | 4.7      | 10<br>0 | F         | F   | F         | F    | F         | F   |
| Cyhexatin        | NA | F         | F   | F         | F       | F         | F   | N<br>A | F         | F        | F         | F        | F         | F    | N<br>A | F         | F        | F         | F        | F        | F        | N<br>A  | F         | F   | F         | F    | F         | F   |

|               |     |       |     |       |     |      |      |    |       |      |       |      |       |      |     |       |      |       |      |       |      |    |       |     |       |     |       |      |
|---------------|-----|-------|-----|-------|-----|------|------|----|-------|------|-------|------|-------|------|-----|-------|------|-------|------|-------|------|----|-------|-----|-------|-----|-------|------|
| Cymoxanil     | 5   | 96.9  | 3.2 | 95.0  | 1.5 | 85.5 | 1.6  | 5  | 109.8 | 0.8  | 96.6  | 5.1  | 90.1  | 6.4  | 5   | 77.4  | 6.4  | 83.6  | 2.1  | 75.3  | 3.7  | 5  | 120.0 | 2.5 | 106.9 | 6.4 | 102.7 | 3.4  |
| Cypermethrin  | 50  | F     | F   | F     | F   | 50.7 | 13.7 | 50 | F     | F    | F     | F    | 90.4  | 5.2  | 50  | F     | F    | F     | F    | 101.5 | 5.6  | 50 | F     | F   | F     | F   | 56.5  | 65.5 |
| Cyproconazole | 5   | 106.3 | 2.3 | 92.3  | 7.4 | 86.3 | 4.3  | 5  | 96.7  | 6.2  | 89.3  | 3.8  | 89.6  | 2.4  | 5   | 98.7  | 22.5 | 89.1  | 6.8  | 89.2  | 8.9  | 5  | 99.0  | 8.5 | 95.5  | 6.9 | 92.0  | 4.5  |
| Cyprodinil    | 1   | 96.8  | 5.2 | 94.4  | 3.8 | 85.6 | 1.3  | 1  | 100.7 | 0.7  | 98.3  | 3.0  | 91.4  | 3.5  | 1   | 100.1 | 4.0  | 97.5  | 3.6  | 89.6  | 2.2  | 1  | 112.7 | 0.5 | 107.7 | 3.8 | 102.6 | 1.1  |
| Cyromazine    | 50  | F     | F   | F     | F   | 32.0 | 8.1  | 5  | 33.8  | 11.5 | 34.5  | 8.9  | 38.1  | 3.6  | 50  | F     | F    | F     | F    | 27.0  | 23.6 | 20 | F     | F   | 50.2  | 5.3 | 54.5  | 3.8  |
| Daminozide    | NA  | F     | F   | F     | F   | F    | F    | 20 | F     | F    | 27.0  | 14.3 | 12.5  | 10.6 | 20  | F     | F    | 23.4  | 74.1 | 11.7  | 38.0 | 5  | F     | F   | F     | F   | F     | F    |
| Dazomet       | 50  | F     | F   | F     | F   | 30.3 | 4.1  | 5  | 4.8   | 6.9  | 12.0  | 13.4 | 18.4  | 9.6  | 50  | F     | F    | F     | F    | 35.2  | 38.7 | 5  | 97.1  | 2.7 | 99.5  | 2.9 | 98.4  | 1.5  |
| Deltamethrin  | 50  | F     | F   | F     | F   | 69.1 | 13.7 | 50 | F     | F    | F     | F    | 78.2  | 6.7  | 100 | F     | F    | F     | F    | F     | F    | 50 | F     | F   | F     | F   | 92.4  | 18.4 |
| Demeton-S     | 5   | 99.3  | 2.5 | 102.5 | 5.4 | 83.2 | 0.2  | 1  | 121.2 | 8.2  | 79.4  | 17.5 | 63.0  | 1.3  | 5   | 84.2  | 7.2  | 107.5 | 19.5 | 79.3  | 8.4  | 5  | 182.2 | 6.7 | 112.9 | 5.8 | 107.6 | 5.6  |
| Desmedipham   | 1   | 93.5  | 0.4 | 92.8  | 6.1 | 84.9 | 2.5  | 1  | 107.0 | 1.6  | 94.4  | 1.3  | 91.4  | 1.4  | 1   | 100.9 | 2.8  | 95.5  | 4.6  | 88.8  | 2.0  | 5  | 117.3 | 1.7 | 107.3 | 3.2 | 100.4 | 1.7  |
| DiaFenthiuron | 100 | F     | F   | F     | F   | F    | F    | 50 | F     | F    | F     | F    | 0.5   | 62.6 | 10  | F     | F    | 110.4 | 5.0  | 80.0  | 3.9  | 50 | F     | F   | F     | F   | 57.0  | 3.2  |
| Diazinon      | 1   | 98.6  | 8.5 | 106.3 | 1.1 | 98.6 | 1.1  | 1  | 115.4 | 3.0  | 111.6 | 6.6  | 107.6 | 2.4  | 1   | 99.9  | 4.8  | 104.2 | 2.5  | 97.8  | 2.8  | 1  | 99.2  | 6.9 | 104.8 | 8.4 | 102.4 | 2.5  |
| Dicamba       | 50  | F     | F   | F     | F   | 20.2 | 70.3 | 20 | F     | F    | 13.3  | 47.8 | 14.6  | 23.5 | 20  | F     | F    | 26.2  | 69.7 | 22.5  | 15.9 | 50 | F     | F   | F     | F   | 30.8  | 27.3 |

|                 |    |       |      |       |      |       |      |    |       |     |       |     |       |     |   |       |      |       |     |       |     |        |       |      |       |      |       |      |
|-----------------|----|-------|------|-------|------|-------|------|----|-------|-----|-------|-----|-------|-----|---|-------|------|-------|-----|-------|-----|--------|-------|------|-------|------|-------|------|
| Dichlofluanid   | 5  | 74.7  | 11.2 | 74.6  | 7.2  | 69.1  | 4.8  | 5  | 94.1  | 5.2 | 96.5  | 5.2 | 91.0  | 2.8 | 5 | 113.0 | 33.1 | 88.2  | 4.8 | 91.0  | 3.5 | 5      | 67.8  | 13.3 | 85.7  | 10.0 | 89.7  | 6.0  |
| Dichlorvos      | 5  | 78.0  | 3.3  | 92.3  | 1.3  | 91.6  | 2.2  | 5  | 90.0  | 1.4 | 95.7  | 4.5 | 92.4  | 3.7 | 5 | 89.1  | 2.4  | 100.2 | 2.2 | 97.6  | 2.6 | 20     | F     | F    | 91.4  | 3.8  | 95.6  | 2.0  |
| Diclofop-methyl | 20 | F     | F    | 106.9 | 8.6  | 94.8  | 2.6  | 20 | F     | F   | 106.5 | 1.7 | 104.5 | 3.8 | 5 | 83.1  | 9.0  | 90.9  | 3.8 | 88.0  | 3.9 | N<br>A | F     | F    | F     | F    | F     | F    |
| DiethoFencarb   | 5  | 107.3 | 3.3  | 87.7  | 4.0  | 80.3  | 2.2  | 5  | 110.3 | 2.6 | 103.9 | 2.7 | 92.8  | 4.3 | 1 | 118.6 | 4.6  | 93.3  | 1.7 | 81.4  | 2.0 | 5      | 110.9 | 4.2  | 102.3 | 1.6  | 95.3  | 1.5  |
| Difenoconazole  | 5  | 85.4  | 10.8 | 90.2  | 2.5  | 84.7  | 1.8  | 5  | 105.5 | 1.7 | 101.6 | 8.1 | 99.5  | 3.8 | 5 | 89.4  | 6.6  | 90.5  | 4.8 | 86.6  | 2.5 | 5      | 94.6  | 7.5  | 96.4  | 5.3  | 97.5  | 3.4  |
| Difenzoquat     | 1  | 102.9 | 7.0  | 98.7  | 4.1  | 94.3  | 0.8  | 1  | 110.0 | 0.8 | 102.4 | 4.7 | 97.5  | 4.5 | 1 | 95.5  | 1.2  | 102.3 | 5.7 | 91.3  | 2.0 | 1      | 113.9 | 3.1  | 108.6 | 2.0  | 107.0 | 1.8  |
| Diflubenzuron   | 20 | F     | F    | 155.1 | 1.5  | 115.9 | 2.7  | 5  | 170.0 | 2.6 | 159.9 | 5.9 | 119.9 | 2.1 | 5 | 177.3 | 3.9  | 159.9 | 2.6 | 126.7 | 7.1 | 20     | F     | F    | 106.2 | 9.9  | 108.3 | 5.9  |
| Diflufenican    | 20 | F     | F    | 102.9 | 15.5 | 93.4  | 13.2 | 20 | F     | F   | 94.1  | 4.2 | 89.7  | 8.5 | 5 | 97.8  | 9.6  | 100.0 | 6.9 | 97.5  | 9.8 | 20     | F     | F    | 94.2  | 11.1 | 91.8  | 12.7 |
| Dimepiperate    | 5  | 86.2  | 8.8  | 87.9  | 6.5  | 78.7  | 1.8  | 20 | F     | F   | 102.3 | 3.0 | 92.7  | 5.1 | 5 | 93.5  | 2.8  | 90.7  | 3.2 | 83.5  | 1.1 | 10     | F     | F    | 100.6 | 10.7 | 98.7  | 5.5  |
| Dimethenamid    | 1  | 91.7  | 5.2  | 97.4  | 3.6  | 90.2  | 0.2  | 1  | 111.2 | 3.3 | 110.2 | 7.7 | 102.9 | 4.1 | 5 | 91.7  | 1.7  | 91.2  | 4.2 | 84.1  | 3.3 | 5      | 113.5 | 2.6  | 106.6 | 5.9  | 102.6 | 1.6  |
| Dimethoate      | 1  | 105.8 | 7.2  | 108.8 | 2.9  | 98.2  | 2.5  | 1  | 121.1 | 0.4 | 112.1 | 7.8 | 104.8 | 3.4 | 5 | 101.1 | 0.4  | 100.9 | 0.9 | 92.8  | 3.4 | 1      | 113.3 | 1.6  | 106.4 | 5.6  | 100.9 | 2.8  |
| Dimethomorph    | 5  | 88.1  | 8.2  | 79.8  | 8.5  | 74.3  | 1.4  | 5  | 103.5 | 1.9 | 92.3  | 1.1 | 89.8  | 4.0 | 5 | 99.2  | 4.0  | 85.8  | 1.9 | 82.6  | 3.1 | 20     | F     | F    | 99.5  | 4.0  | 96.7  | 3.9  |
| Diniconazole    | 5  | 94.9  | 4.6  | 101.8 | 3.2  | 100.5 | 1.5  | 5  | 97.1  | 1.5 | 98.2  | 6.9 | 97.4  | 2.5 | 5 | 95.5  | 5.0  | 103.1 | 2.7 | 97.4  | 1.0 | 5      | 90.6  | 4.4  | 97.4  | 9.2  | 94.7  | 1.6  |

|                      |     |       |      |       |     |       |     |    |       |     |       |     |       |      |    |       |     |       |     |       |      |    |       |     |       |     |       |      |
|----------------------|-----|-------|------|-------|-----|-------|-----|----|-------|-----|-------|-----|-------|------|----|-------|-----|-------|-----|-------|------|----|-------|-----|-------|-----|-------|------|
| Dinocap              | NA  | F     | F    | F     | F   | F     | F   | NA | F     | F   | F     | F   | F     | F    | NA | F     | F   | F     | F   | F     | F    | NA | F     | F   | F     | F   | F     |      |
| Dinotefuran          | 5   | 97.5  | 6.1  | 103.0 | 1.0 | 88.4  | 0.7 | 5  | 113.8 | 0.3 | 108.5 | 5.9 | 99.4  | 4.9  | 5  | 79.1  | 9.5 | 89.3  | 1.7 | 86.3  | 1.1  | 5  | 114.0 | 0.5 | 107.4 | 6.6 | 98.2  | 3.1  |
| Diphenylamine        | 50  | F     | F    | F     | F   | 84.6  | 3.7 | 5  | 84.1  | 3.6 | 78.7  | 4.0 | 83.0  | 4.0  | 50 | F     | F   | F     | F   | 87.4  | 2.8  | 50 | F     | F   | F     | F   | 79.1  | 3.7  |
| Disulfoton sulfone   | 1   | 113.6 | 2.6  | 106.7 | 6.0 | 94.6  | 1.0 | 1  | 126.1 | 0.9 | 105.3 | 3.1 | 96.3  | 2.9  | 1  | 119.3 | 4.8 | 104.9 | 3.2 | 93.7  | 3.1  | 1  | 113.2 | 3.5 | 108.9 | 3.5 | 99.5  | 4.3  |
| Disulfoton-sulfoxide | 1   | 158.5 | 1.4  | 147.1 | 3.7 | 113.7 | 5.7 | 1  | 197.6 | 1.5 | 171.7 | 4.2 | 132.1 | 1.9  | 1  | 155.6 | 6.0 | 123.5 | 3.8 | 106.3 | 1.3  | 1  | 117.0 | 2.7 | 109.1 | 2.0 | 97.8  | 2.2  |
| Disulfoton           | 100 | F     | F    | F     | F   | F     | F   | 50 | F     | F   | F     | F   | 19.2  | 50.0 | 20 | F     | F   | 33.0  | 3.9 | 61.7  | 10.2 | 50 | F     | F   | F     | F   | 108.4 | 22.3 |
| Dithianon            | NA  | F     | F    | F     | F   | F     | F   | NA | F     | F   | F     | F   | F     | F    | NA | F     | F   | F     | F   | F     | F    | NA | F     | F   | F     | F   | F     | F    |
| Diuron               | 1   | 112.1 | 5.2  | 112.6 | 2.1 | 99.9  | 2.3 | 1  | 121.0 | 3.5 | 116.0 | 6.8 | 105.5 | 2.3  | 1  | 114.8 | 4.1 | 115.2 | 1.0 | 101.6 | 2.2  | 5  | 113.2 | 1.8 | 110.5 | 6.1 | 105.1 | 1.3  |
| Dodine               | 1   | 116.5 | 1.9  | 105.8 | 5.3 | 89.2  | 0.6 | 1  | 129.0 | 2.0 | 106.7 | 3.5 | 90.9  | 7.8  | 1  | 108.4 | 4.0 | 108.2 | 1.3 | 93.1  | 4.3  | 1  | 167.6 | 2.7 | 139.4 | 2.3 | 114.6 | 2.0  |
| Dufulin              | 1   | 99.6  | 6.4  | 94.9  | 6.2 | 85.3  | 0.7 | 5  | 106.4 | 2.5 | 100.2 | 0.7 | 93.3  | 4.2  | 1  | 102.5 | 4.5 | 99.8  | 3.4 | 92.1  | 3.2  | 5  | 116.7 | 5.6 | 110.0 | 5.0 | 102.9 | 2.5  |
| Edifenphos           | 1   | 119.7 | 8.4  | 121.7 | 2.1 | 104.8 | 2.0 | 1  | 132.0 | 0.8 | 120.3 | 6.7 | 114.2 | 2.5  | 1  | 117.5 | 4.0 | 117.7 | 2.2 | 105.0 | 3.1  | 1  | 119.5 | 4.7 | 116.1 | 6.1 | 111.2 | 0.6  |
| Emamectin B1A        | 5   | 79.2  | 14.3 | 82.3  | 7.3 | 72.8  | 3.4 | 5  | 93.2  | 3.7 | 94.8  | 1.9 | 91.7  | 6.0  | 20 | F     | F   | 85.2  | 2.5 | 81.7  | 6.4  | 1  | 98.2  | 9.9 | 104.3 | 3.2 | 94.3  | 6.7  |
| Endosulfansulfate    | 1   | 77.8  | 1.8  | 84.6  | 7.0 | 81.4  | 7.2 | 5  | 114.8 | 6.4 | 99.0  | 4.4 | 96.9  | 5.9  | 5  | 112.2 | 1.2 | 104.3 | 4.6 | 96.4  | 6.2  | 5  | 98.0  | 6.6 | 90.9  | 3.0 | 81.6  | 5.1  |



|                 |         |           |          |           |         |           |     |        |           |     |           |     |           |     |         |           |          |           |          |           |          |        |           |          |           |      |           |          |
|-----------------|---------|-----------|----------|-----------|---------|-----------|-----|--------|-----------|-----|-----------|-----|-----------|-----|---------|-----------|----------|-----------|----------|-----------|----------|--------|-----------|----------|-----------|------|-----------|----------|
| Enestroburin    | 1       | 10<br>3.1 | 9.0      | 108.<br>0 | 2.<br>0 | 97.<br>2  | 1.6 | 1      | 107.<br>8 | 0.9 | 101.<br>4 | 6.5 | 98.<br>9  | 7.6 | 1       | 100.<br>5 | 6.1      | 108.<br>3 | 2.9      | 97.<br>9  | 0.1      | 1      | 112.<br>6 | 2.0      | 105.<br>8 | 5.0  | 106.<br>6 | 5.5      |
| Epoxiconazole   | 5       | 10<br>3.7 | 3.2      | 108.<br>7 | 2.<br>7 | 101.<br>0 | 1.2 | 5      | 111.<br>9 | 0.7 | 111.<br>1 | 5.9 | 108.<br>5 | 5.2 | 5       | 105.<br>6 | 5.0      | 110.<br>8 | 2.9      | 104.<br>0 | 2.8      | 20     | F         | F        | 101.<br>6 | 2.7  | 100.<br>0 | 5.8      |
| Ethametsulfuron | NA      | F         | F        | F         | F       | F         | F   | N<br>A | F         | F   | F         | F   | F         | F   | N<br>A  | F         | F        | F         | F        | F         | F        | N<br>A | F         | F        | F         | F    | F         | F        |
| Ethion          | 5       | 79.<br>0  | 3.9      | 76.5      | 5.<br>4 | 73.<br>7  | 5.4 | 1      | 90.6      | 0.5 | 89.6      | 0.8 | 88.<br>4  | 2.2 | 1       | 88.2      | 6.5      | 85.4      | 4.5      | 84.<br>3  | 0.5      | 1      | 102.<br>2 | 5.4      | 97.3      | 2.8  | 94.7      | 4.7      |
| Ethiprole       | 20      | F         | F        | 103.<br>2 | 6.<br>2 | 92.<br>6  | 2.6 | 20     | F         | F   | 103.<br>0 | 1.8 | 95.<br>9  | 1.2 | 20      | F         | F        | 99.4      | 6.2      | 93.<br>2  | 1.2      | 20     | F         | F        | 90.2      | 7.1  | 97.2      | 2.4      |
| Ethirimol       | 5       | 60.<br>9  | 6.6      | 65.2      | 3.<br>6 | 65.<br>1  | 4.8 | 1      | 79.4      | 1.2 | 73.8      | 4.7 | 71.<br>6  | 3.9 | 5       | 63.9      | 3.1      | 68.5      | 2.3      | 66.<br>4  | 1.7      | 1      | 85.7      | 0.5      | 85.5      | 5.1  | 82.5      | 1.7      |
| Ethofenprox     | 1       | 87.<br>3  | 11.<br>1 | 97.6      | 5.<br>1 | 86.<br>1  | 1.5 | 1      | 95.4      | 1.2 | 95.5      | 4.2 | 96.<br>7  | 2.0 | 1       | 86.7      | 5.0      | 94.4      | 1.4      | 91.<br>4  | 2.2      | 1      | 96.6      | 0.6      | 96.6      | 11.5 | 95.9      | 1.9      |
| Ethofumesate    | 1       | 93.<br>1  | 3.0      | 91.3      | 6.<br>6 | 85.<br>7  | 0.3 | 5      | 109.<br>5 | 1.2 | 99.4      | 3.5 | 94.<br>8  | 4.9 | 5       | 104.<br>5 | 1.2      | 92.7      | 2.8      | 87.<br>1  | 0.7      | 5      | 108.<br>9 | 2.7      | 100.<br>3 | 1.0  | 96.5      | 2.1      |
| Ethoprophos     | 1       | 10<br>2.0 | 7.2      | 95.7      | 6.<br>0 | 84.<br>7  | 1.8 | 1      | 109.<br>9 | 0.7 | 105.<br>2 | 2.3 | 96.<br>5  | 4.2 | 5       | 107.<br>6 | 8.8      | 101.<br>9 | 2.7      | 92.<br>1  | 3.4      | 5      | 111.<br>0 | 1.7      | 108.<br>2 | 5.1  | 103.<br>6 | 3.9      |
| Ethoxyquin      | 10<br>0 | F         | F        | F         | F       | F         | F   | 1      | F         | F   | F         | F   | F         | F   | 10<br>0 | F         | F        | F         | F        | F         | F        | 5      | 5.5       | 16.<br>8 | 8.8       | 15.2 | 6.1       | 45.<br>0 |
| Ethoxysulfuron  | 10      | F         | F        | 56.3      | 4.<br>6 | 69.<br>3  | 7.4 | 10     | F         | F   | 54.5      | 8.0 | 65.<br>1  | 1.5 | 5       | 71.7      | 41.<br>3 | 62.7      | 14.<br>6 | 80.<br>4  | 21.<br>1 | 20     | F         | F        | 46.1      | 16.1 | 66.0      | 8.3      |
| Etiozazole      | 1       | 88.<br>7  | 2.2      | 87.3      | 4.<br>5 | 82.<br>3  | 2.7 | 1      | 100.<br>0 | 2.1 | 88.2      | 1.5 | 88.<br>0  | 5.8 | 1       | 105.<br>0 | 0.6      | 92.0      | 3.3      | 91.<br>4  | 3.7      | 1      | 105.<br>4 | 1.0      | 100.<br>2 | 3.7  | 90.5      | 3.9      |
| Famoxadone      | 5       | 69.<br>1  | 21.<br>4 | 75.6      | 7.<br>3 | 65.<br>7  | 6.4 | 10     | F         | F   | 105.<br>7 | 6.7 | 98.<br>4  | 0.3 | 20      | F         | F        | 97.7      | 1.5      | 91.<br>9  | 1.7      | 5      | 85.8      | 4.4      | 86.9      | 3.8  | 86.4      | 3.3      |

|                      |    |       |     |       |      |       |     |    |       |     |       |     |       |     |    |       |      |       |      |       |      |    |       |      |       |     |       |     |
|----------------------|----|-------|-----|-------|------|-------|-----|----|-------|-----|-------|-----|-------|-----|----|-------|------|-------|------|-------|------|----|-------|------|-------|-----|-------|-----|
| Fenamidone           | 1  | 98.4  | 4.4 | 96.1  | 2.3  | 86.5  | 0.9 | 5  | 106.3 | 0.8 | 97.5  | 5.4 | 91.4  | 3.7 | 5  | 100.0 | 2.2  | 98.5  | 2.8  | 89.2  | 2.6  | 5  | 109.9 | 7.3  | 103.2 | 3.9 | 102.7 | 5.0 |
| Fenaminstrobin       | 1  | 109.3 | 5.6 | 104.4 | 4.7  | 93.0  | 2.4 | 1  | 114.9 | 1.7 | 105.7 | 4.8 | 96.3  | 3.4 | 1  | 94.4  | 4.7  | 92.7  | 2.5  | 86.5  | 2.1  | 1  | 122.4 | 4.2  | 118.1 | 3.7 | 110.0 | 1.4 |
| Fenamiphos sulfone   | 1  | 112.6 | 1.1 | 116.1 | 2.4  | 106.4 | 2.2 | 1  | 120.6 | 1.0 | 115.0 | 6.4 | 113.0 | 3.2 | 5  | 108.9 | 5.3  | 122.2 | 3.2  | 111.7 | 1.0  | 1  | 102.1 | 5.7  | 103.0 | 3.7 | 100.5 | 0.9 |
| Fenamiphos sulfoxide | 1  | 126.8 | 4.9 | 118.0 | 2.2  | 103.6 | 4.3 | 1  | 157.6 | 1.7 | 135.5 | 7.4 | 120.5 | 3.5 | 5  | 114.9 | 5.3  | 117.5 | 4.2  | 106.4 | 2.3  | 5  | 105.0 | 0.6  | 102.3 | 4.0 | 96.6  | 2.7 |
| Fenamiphos           | 1  | 82.9  | 3.4 | 101.0 | 2.9  | 98.0  | 0.8 | 1  | 64.0  | 0.8 | 82.2  | 3.2 | 93.7  | 4.8 | 1  | 97.5  | 3.2  | 104.0 | 4.7  | 97.1  | 2.5  | 1  | 126.6 | 1.2  | 119.0 | 2.8 | 109.2 | 1.0 |
| Fenarimol            | 20 | F     | F   | 100.8 | 5.3  | 97.7  | 4.6 | 50 | F     | F   | F     | F   | 92.1  | 3.6 | 20 | F     | F    | 100.7 | 1.2  | 90.9  | 0.9  | 50 | F     | F    | F     | F   | 100.9 | 3.7 |
| Fenazaquin           | 1  | 96.6  | 2.9 | 96.0  | 7.0  | 85.0  | 2.1 | 1  | 104.2 | 1.9 | 98.6  | 1.0 | 91.6  | 2.8 | 1  | 94.4  | 3.9  | 97.4  | 2.5  | 87.6  | 0.6  | 1  | 116.4 | 0.7  | 109.6 | 3.3 | 101.7 | 2.8 |
| Fenbuconazole        | 50 | F     | F   | F     | F    | 94.1  | 1.2 | 5  | 106.4 | 3.1 | 98.7  | 0.6 | 93.7  | 5.1 | 5  | 105.1 | 0.3  | 99.9  | 5.6  | 93.6  | 3.4  | 5  | 110.9 | 2.0  | 100.8 | 2.8 | 97.4  | 0.2 |
| Fenbutatinoxide      | NA | F     | F   | F     | F    | F     | F   | NA | F     | F   | F     | F   | F     | F   | NA | F     | F    | F     | F    | F     | F    | NA | F     | F    | F     | F   | F     | F   |
| Fenhexamid           | 20 | F     | F   | 97.4  | 5.6  | 87.1  | 2.9 | 50 | F     | F   | F     | F   | 93.3  | 4.9 | 5  | 88.4  | 12.7 | 96.9  | 0.7  | 91.3  | 2.8  | 50 | F     | F    | F     | F   | 97.6  | 2.9 |
| Fenobucarb           | 1  | 131.5 | 2.2 | 92.2  | 4.8  | 80.6  | 0.4 | 1  | 112.3 | 0.4 | 98.0  | 1.0 | 91.7  | 2.1 | 1  | 95.3  | 3.9  | 89.3  | 3.6  | 82.0  | 3.6  | 1  | 113.5 | 1.9  | 102.0 | 0.9 | 94.1  | 1.1 |
| Fenothiocarb         | 1  | 104.3 | 7.6 | 108.3 | 3.7  | 96.8  | 4.2 | 1  | 113.6 | 0.2 | 112.6 | 5.2 | 102.8 | 2.0 | 1  | 109.6 | 3.3  | 111.0 | 1.0  | 101.6 | 2.3  | 1  | 80.3  | 76.6 | 110.3 | 5.6 | 106.2 | 1.3 |
| Fenoxanil            | 5  | 85.9  | F   | 65.9  | 71.3 | 81.6  | F   | 5  | 105.7 | 5.9 | 112.2 | 2.0 | 99.7  | 8.2 | 1  | 99.3  | 16.1 | 102.2 | 10.3 | 75.9  | 62.4 | 20 | F     | F    | F     | F   | F     | F   |

|                     |    |       |      |       |      |       |      |    |       |      |       |      |       |     |    |       |      |       |      |       |     |    |       |      |       |      |       |      |
|---------------------|----|-------|------|-------|------|-------|------|----|-------|------|-------|------|-------|-----|----|-------|------|-------|------|-------|-----|----|-------|------|-------|------|-------|------|
| Fenoxaprop-ethyl    | 5  | 87.4  | 5.0  | 89.5  | 4.4  | 78.9  | 2.3  | 1  | 100.6 | 1.8  | 96.3  | 4.2  | 93.1  | 5.0 | 1  | 89.6  | 2.2  | 95.1  | 3.5  | 86.7  | 1.6 | 1  | 110.0 | 3.8  | 105.3 | 3.2  | 101.2 | 1.6  |
| Fenpropathrin       | 50 | F     | F    | F     | F    | 71.2  | 6.5  | 20 | F     | F    | 90.2  | 3.4  | 88.6  | 4.8 | 50 | F     | F    | F     | F    | 87.5  | 4.5 | 20 | F     | F    | 109.9 | 10.4 | 99.7  | 4.3  |
| Fenpropidin         | 1  | 98.8  | 3.8  | 98.9  | 4.9  | 95.2  | 1.4  | 1  | 109.3 | 1.8  | 107.6 | 8.6  | 101.5 | 2.2 | 1  | 97.6  | 3.8  | 102.8 | 5.3  | 98.3  | 0.9 | 1  | 110.3 | 1.4  | 106.6 | 4.2  | 101.8 | 3.5  |
| Fenpropimorph       | 1  | 93.5  | 3.1  | 90.3  | 5.5  | 85.2  | 1.7  | 1  | 100.4 | 3.4  | 91.3  | 4.0  | 88.1  | 4.7 | 1  | 91.3  | 0.4  | 85.8  | 4.4  | 83.4  | 1.2 | 1  | 100.4 | 1.9  | 92.5  | 3.0  | 89.5  | 4.9  |
| Fenpyroximate       | 1  | 92.2  | 3.7  | 90.9  | 12.0 | 86.8  | 1.7  | 1  | 92.5  | 1.6  | 82.3  | 4.4  | 85.7  | 5.8 | 5  | 85.7  | 7.3  | 89.7  | 0.6  | 83.5  | 1.0 | 1  | 96.6  | 3.1  | 88.9  | 2.4  | 84.3  | 2.6  |
| Fenthion sulfone    | 1  | 109.7 | 2.3  | 113.2 | 2.6  | 104.0 | 4.9  | 1  | 108.7 | 0.4  | 108.9 | 6.6  | 99.0  | 1.2 | 1  | 105.2 | 3.2  | 109.4 | 2.3  | 105.3 | 2.0 | 1  | 106.1 | 1.8  | 107.7 | 3.9  | 103.0 | 2.9  |
| Fenthion sulfoxide  | 5  | 128.2 | 5.1  | 125.6 | 3.1  | 110.2 | 0.6  | 1  | 182.2 | 5.6  | 171.7 | 3.8  | 135.3 | 2.8 | 1  | 127.6 | 1.6  | 122.0 | 3.2  | 106.0 | 2.3 | 1  | 115.5 | 2.4  | 108.9 | 4.2  | 106.0 | 1.2  |
| Fenthion            | 50 | F     | F    | F     | F    | 73.4  | 6.7  | 20 | F     | F    | 39.8  | 12.2 | 55.0  | 1.3 | 1  | 43.7  | 32.3 | 76.8  | 10.2 | 81.2  | 3.2 | 20 | F     | F    | 13.2  | 20.2 | 90.6  | 23.3 |
| Fentinacetate       | NA | F     | F    | F     | F    | F     | F    | NA | F     | F    | F     | F    | F     | F   | NA | F     | F    | F     | F    | F     | F   | NA | F     | F    | F     | F    | F     | F    |
| Fenvalerate         | 5  | 70.8  | 36.2 | 99.2  | 11.3 | 80.5  | 6.8  | 5  | 26.1  | 23.0 | 91.4  | 13.0 | 97.7  | 3.6 | 20 | F     | F    | 71.5  | 12.2 | 94.7  | 4.9 | 5  | 70.8  | 36.2 | 99.2  | 11.3 | 80.5  | 6.8  |
| Fipronil-desulfinyl | 5  | 97.3  | 7.7  | 98.8  | 2.7  | 89.6  | 2.5  | 5  | 101.5 | 1.8  | 93.0  | 1.4  | 91.3  | 4.0 | 1  | 98.0  | 3.8  | 98.7  | 2.8  | 94.5  | 5.0 | 1  | 113.2 | 3.1  | 107.1 | 6.0  | 104.6 | 3.7  |
| Fipronil-sulfide    | 1  | 99.1  | 9.9  | 108.1 | 3.6  | 101.6 | 2.9  | 1  | 103.4 | 2.8  | 106.9 | 9.4  | 101.8 | 6.4 | 1  | 103.2 | 4.3  | 115.5 | 5.8  | 108.9 | 1.8 | 1  | 101.6 | 4.1  | 98.8  | 5.7  | 96.2  | 3.1  |
| Fipronil-sulfone    | 5  | 99.2  | 22.3 | 124.3 | 7.4  | 67.6  | 49.3 | 5  | 29.4  | 51.1 | 103.4 | 25.1 | 103.0 | 3.0 | 50 | F     | F    | F     | F    | 104.6 | 6.9 | 10 | F     | F    | 61.2  | 4.0  | 85.6  | 8.2  |

|                 |    |       |      |       |      |       |     |    |       |      |       |      |       |      |    |       |      |       |      |       |      |     |       |     |       |      |       |      |
|-----------------|----|-------|------|-------|------|-------|-----|----|-------|------|-------|------|-------|------|----|-------|------|-------|------|-------|------|-----|-------|-----|-------|------|-------|------|
| Fipronil        | 5  | 86.8  | 16.8 | 101.1 | 5.9  | 89.4  | 0.5 | 5  | 80.9  | 10.1 | 107.1 | 11.3 | 99.2  | 3.1  | 5  | 113.6 | 8.4  | 109.3 | 2.1  | 101.1 | 6.9  | 20  | F     | F   | 105.9 | 23.5 | 106.8 | 12.2 |
| Flonicamid      | 5  | 60.6  | 21.4 | 83.8  | 15.4 | 92.1  | 4.3 | 10 | F     | F    | 87.1  | 10.4 | 95.4  | 7.7  | 5  | 95.0  | 29.6 | 84.3  | 23.8 | 75.7  | 4.6  | 5   | 90.1  | 5.0 | 92.9  | 4.1  | 97.6  | 2.0  |
| Florasulam      | 20 | F     | F    | 64.7  | 7.7  | 76.2  | 1.8 | 20 | F     | F    | 65.4  | 20.0 | 71.1  | 14.8 | 10 | F     | F    | 68.4  | 14.0 | 75.9  | 6.3  | 20  | 41.3  | 1.6 | 55.9  | 21.1 | 76.0  | 10.0 |
| Fluazifop-butyl | 1  | 92.1  | 8.4  | 95.6  | 6.4  | 87.2  | 3.0 | 1  | 116.3 | 1.5  | 115.4 | 6.9  | 107.6 | 6.8  | 1  | 88.1  | 11.2 | 92.9  | 2.8  | 91.8  | 5.9  | 5   | 100.5 | 2.8 | 98.8  | 7.5  | 96.2  | 1.5  |
| Fluazinam       | 50 | F     | F    | F     | F    | 78.9  | 3.1 | 20 | F     | F    | 91.4  | 3.4  | 90.0  | 3.4  | 20 | F     | F    | 95.2  | 5.0  | 92.0  | 2.5  | 20  | 94.2  | 0.7 | 96.1  | 1.1  | 101.7 | 3.3  |
| Flubendiamide   | 5  | 160.8 | 10.3 | 164.0 | 8.1  | 129.1 | 1.5 | 5  | 170.2 | 1.0  | 150.6 | 4.9  | 127.6 | 2.6  | 5  | 181.6 | 7.0  | 168.8 | 8.7  | 131.1 | 3.5  | 5   | 154.4 | 6.9 | 156.5 | 8.0  | 126.7 | 3.7  |
| Flucarbazone    | 5  | 15.3  | 45.2 | 34.1  | 5.0  | 50.4  | 9.5 | 5  | 7.5   | 2.6  | 25.4  | 49.8 | 35.7  | 33.9 | 50 | F     | F    | F     | F    | 27.5  | 32.7 | 20  | F     | F   | 40.7  | 32.0 | 71.5  | 9.7  |
| Flucetosulfuron | 50 | F     | F    | F     | F    | 70.1  | 1.6 | 10 | F     | F    | 69.5  | 6.8  | 77.4  | 7.1  | 10 | F     | F    | 87.3  | 7.9  | 94.6  | 1.4  | 100 | F     | F   | F     | F    | F     | F    |
| Flucythrinate   | 20 | F     | F    | 95.8  | 7.3  | 87.2  | 2.2 | 20 | F     | F    | 104.1 | 8.3  | 105.6 | 3.5  | 20 | F     | F    | 91.6  | 6.9  | 90.1  | 5.4  | 20  | 88.8  | 3.5 | 90.8  | 6.6  | 94.1  | 2.4  |
| Fludioxonil     | 1  | 77.3  | 5.3  | 90.1  | 2.9  | 88.3  | 4.8 | 1  | 54.7  | 10.8 | 63.8  | 6.5  | 92.7  | 5.2  | 1  | 98.7  | 4.5  | 99.9  | 1.6  | 98.0  | 1.8  | 1   | 112.0 | 3.5 | 108.5 | 8.4  | 105.5 | 1.6  |
| Flufenacet      | 1  | 102.0 | 8.8  | 103.9 | 3.5  | 93.4  | 1.2 | 1  | 112.4 | 3.0  | 112.0 | 8.3  | 103.7 | 2.8  | 1  | 109.2 | 11.9 | 109.0 | 2.6  | 106.0 | 2.6  | 5   | 99.7  | 1.8 | 103.4 | 8.1  | 101.0 | 3.1  |
| Flufenoxuron    | 20 | F     | F    | 78.9  | 8.2  | 75.4  | 1.7 | 1  | 76.8  | 6.1  | 84.0  | 4.2  | 84.5  | 7.4  | 20 | F     | F    | 77.0  | 9.2  | 67.2  | 4.9  | 20  | F     | F   | 95.2  | 13.4 | 90.5  | 6.8  |
| Flufiprole      | 1  | 105.4 | 1.7  | 98.9  | 4.9  | 90.2  | 3.3 | 5  | 93.8  | 0.7  | 98.9  | 3.1  | 92.9  | 7.0  | 5  | 92.5  | 13.4 | 92.4  | 7.5  | 88.5  | 0.8  | 5   | 95.1  | 1.2 | 100.4 | 14.1 | 105.0 | 3.8  |

|                      |    |       |      |       |     |       |     |    |       |     |       |      |       |      |    |       |      |       |      |       |      |    |       |      |       |      |       |     |
|----------------------|----|-------|------|-------|-----|-------|-----|----|-------|-----|-------|------|-------|------|----|-------|------|-------|------|-------|------|----|-------|------|-------|------|-------|-----|
| Flumetrain           | NA | F     | F    | F     | F   | F     | F   | 10 | F     | F   | 27.6  | 0.2  | 33.5  | 62.6 | 50 | F     | F    | F     | F    | 60.7  | 35.0 | NA | F     | F    | F     | F    | F     | F   |
| Flumetsulam          | 20 | F     | F    | 75.2  | 3.1 | 82.5  | 2.1 | 20 | F     | F   | 76.8  | 16.8 | 82.2  | 12.2 | 20 | F     | F    | 86.6  | 14.5 | 86.0  | 6.5  | 20 | 52.0  | 5.6  | 59.8  | 15.1 | 77.0  | 5.2 |
| Flumiclorac-pentyl   | 1  | 104.5 | 1.9  | 101.6 | 5.5 | 92.2  | 3.3 | 5  | 109.9 | 2.8 | 104.8 | 0.9  | 96.4  | 4.1  | 5  | 99.3  | 1.7  | 103.4 | 2.6  | 93.1  | 0.9  | 5  | 69.4  | 11.9 | 95.1  | 7.8  | 104.1 | 4.9 |
| Flumioxazin          | 50 | F     | F    | F     | F   | 37.0  | 9.8 | 10 | F     | F   | 44.4  | 24.4 | 63.1  | 7.0  | 10 | F     | F    | 21.9  | 62.4 | 46.9  | 37.5 | 10 | F     | F    | 75.8  | 17.1 | 83.9  | 5.2 |
| Flumorph             | 5  | 109.3 | 1.5  | 100.5 | 4.3 | 95.7  | 3.7 | 5  | 111.8 | 1.7 | 99.7  | 1.1  | 96.2  | 4.8  | 5  | 109.5 | 1.6  | 104.6 | 3.2  | 98.1  | 3.7  | 5  | 112.8 | 1.4  | 108.2 | 2.3  | 103.6 | 2.1 |
| Fluopicolide         | 5  | 86.8  | 10.9 | 92.1  | 3.9 | 82.1  | 2.3 | 5  | 108.3 | 6.4 | 111.3 | 5.1  | 101.9 | 5.0  | 5  | 96.5  | 7.5  | 96.3  | 2.2  | 90.6  | 0.8  | 5  | 88.4  | 7.7  | 92.5  | 11.4 | 91.8  | 2.9 |
| Fluopyram            | 1  | 112.7 | 6.6  | 106.4 | 3.5 | 94.3  | 2.8 | 5  | 98.1  | 3.3 | 99.5  | 5.4  | 100.1 | 0.8  | 5  | 107.4 | 36.3 | 98.7  | 2.9  | 104.5 | 22.2 | 5  | 98.6  | 3.8  | 96.2  | 4.9  | 93.3  | 6.5 |
| Fluoroglycofen-ethyl | 20 | F     | F    | 91.7  | 6.2 | 84.5  | 6.7 | 1  | 99.5  | 3.6 | 89.8  | 3.6  | 86.4  | 7.5  | 20 | F     | F    | 97.1  | 7.1  | 91.3  | 6.1  | 10 | F     | F    | 122.8 | 5.2  | 105.3 | 2.0 |
| Fluroxypyr           | NA | F     | F    | F     | F   | F     | F   | 10 | F     | F   | 16.5  | 1.3  | 5.3   | 2.6  | NA | F     | F    | F     | F    | F     | F    | NA | F     | F    | F     | F    | F     | F   |
| Flurtamone           | 1  | 98.3  | 8.1  | 102.9 | 3.0 | 93.1  | 2.1 | 1  | 107.8 | 2.9 | 105.9 | 5.0  | 98.3  | 0.9  | 1  | 101.2 | 2.6  | 101.2 | 1.0  | 95.6  | 3.6  | 1  | 95.8  | 12.2 | 105.0 | 8.7  | 103.8 | 6.6 |
| Flusilazole          | 1  | 105.6 | 1.4  | 101.5 | 4.2 | 92.7  | 0.8 | 5  | 113.7 | 1.9 | 106.2 | 1.4  | 99.9  | 6.0  | 5  | 105.1 | 2.3  | 104.2 | 2.5  | 92.7  | 3.2  | 5  | 120.7 | 3.4  | 116.7 | 2.9  | 106.1 | 1.1 |
| Fluthiacet-methyl    | 5  | 100.6 | 8.7  | 115.8 | 2.8 | 108.2 | 3.4 | 5  | 106.2 | 0.6 | 106.3 | 9.8  | 103.4 | 2.9  | 5  | 98.9  | 4.0  | 108.6 | 5.7  | 98.1  | 6.1  | 20 | F     | F    | 97.2  | 11.7 | 97.3  | 5.2 |
| Flutolanil           | 1  | 93.1  | 12.0 | 94.9  | 2.8 | 85.4  | 3.0 | 1  | 114.3 | 3.0 | 110.3 | 7.4  | 102.6 | 2.1  | 1  | 102.1 | 5.6  | 101.5 | 3.0  | 92.6  | 2.4  | 5  | 103.1 | 2.7  | 104.1 | 4.6  | 103.0 | 3.3 |

|                         |    |           |          |           |          |           |          |    |           |     |           |          |           |      |    |           |          |           |          |            |          |        |           |          |           |      |           |          |
|-------------------------|----|-----------|----------|-----------|----------|-----------|----------|----|-----------|-----|-----------|----------|-----------|------|----|-----------|----------|-----------|----------|------------|----------|--------|-----------|----------|-----------|------|-----------|----------|
| Flutriafol              | 5  | 10<br>0.3 | 6.4      | 93.9      | 2.<br>4  | 91.<br>2  | 2.0      | 5  | 99.0      | 1.9 | 90.2      | 1.4      | 88.<br>4  | 3.9  | 5  | 92.6      | 3.8      | 89.1      | 7.0      | 85.<br>9   | 1.6      | 5      | 100.<br>8 | 2.9      | 94.4      | 3.4  | 91.7      | 3.3      |
| Fluxapyroxad            | 1  | 92.<br>7  | 6.5      | 87.1      | 2.<br>6  | 76.<br>9  | 2.9      | 1  | 111.<br>0 | 2.7 | 104.<br>7 | 3.7      | 92.<br>1  | 2.7  | 1  | 96.2      | 1.7      | 94.8      | 1.2      | 85.<br>8   | 0.9      | 1      | 125.<br>7 | 5.9      | 116.<br>2 | 6.2  | 108.<br>5 | 2.9      |
| Fomesafen               | 1  | 85.<br>3  | 7.9      | 81.9      | 6.<br>8  | 88.<br>3  | 1.8      | 1  | 97.6      | 5.0 | 92.9      | 2.2      | 96.<br>1  | 4.0  | 1  | 103.<br>2 | 1.8      | 83.8      | 77.<br>5 | 94.<br>1   | 3.4      | 1      | 68.7      | 6.2      | 85.5      | 7.7  | 99.9      | 2.4      |
| Fonophos                | 50 | F         | F        | F         | F        | 87.<br>3  | 5.1      | 10 | F         | F   | 87.0      | 10.<br>7 | 92.<br>3  | 3.0  | 5  | 77.4      | 7.1      | 96.4      | 5.0      | 101.<br>.6 | 13.<br>4 | 50     | F         | F        | F         | F    | 93.3      | 11.<br>6 |
| Forchlorfenuron         | 5  | 93.<br>4  | 1.3      | 94.8      | 3.<br>6  | 87.<br>4  | 0.6      | 20 | F         | F   | 91.4      | 2.1      | 89.<br>8  | 3.6  | 20 | F         | F        | 93.7      | 1.7      | 86.<br>4   | 1.9      | 20     | F         | F        | 110.<br>9 | 2.7  | 108.<br>1 | 0.3      |
| Fosthiazate             | 1  | 10<br>2.3 | 3.6      | 106.<br>3 | 3.<br>8  | 99.<br>8  | 4.2      | 1  | 107.<br>6 | 0.7 | 108.<br>0 | 7.9      | 99.<br>3  | 0.8  | 1  | 100.<br>9 | 3.2      | 105.<br>1 | 2.3      | 100<br>.3  | 1.8      | 1      | 103.<br>5 | 1.1      | 105.<br>1 | 5.0  | 100.<br>6 | 4.0      |
| Halosulfuron-<br>methyl | 50 | F         | F        | F         | F        | 71.<br>7  | 3.9      | 50 | F         | F   | F         | F        | 71.<br>1  | 4.8  | 20 | F         | F        | 77.0      | 9.6      | 83.<br>6   | 3.9      | 50     | F         | F        | F         | F    | 83.1      | 7.3      |
| Haloxyfop-<br>methyl    | 1  | 94.<br>5  | 9.6      | 98.5      | 4.<br>5  | 88.<br>3  | 1.6      | 1  | 114.<br>1 | 1.8 | 113.<br>4 | 4.3      | 105<br>.3 | 5.2  | 1  | 101.<br>9 | 4.6      | 107.<br>7 | 0.8      | 98.<br>9   | 1.3      | 5      | 97.8      | 5.5      | 98.4      | 6.0  | 96.5      | 1.7      |
| Hexaconazole            | 5  | 88.<br>3  | 11.<br>6 | 88.6      | 2.<br>4  | 85.<br>0  | 3.9      | 5  | 104.<br>4 | 4.5 | 96.1      | 3.6      | 92.<br>7  | 0.7  | 5  | 96.9      | 4.9      | 94.3      | 3.2      | 92.<br>2   | 1.1      | 20     | F         | F        | 102.<br>8 | 0.5  | 102.<br>5 | 3.6      |
| Hexaflumuron            | NA | F         | F        | F         | F        | F         | F        | 10 | F         | F   | 74.5      | 20.<br>2 | 83.<br>0  | 14.7 | 20 | F         | F        | 18.9      | 53.<br>9 | 34.<br>5   | 7.9      | N<br>A | F         | F        | F         | F    | F         | F        |
| Hexanoic acid           | 10 | F         | F        | 144.<br>9 | 7.<br>7  | 100<br>.6 | 18.<br>0 | 50 | F         | F   | F         | F        | 124<br>.1 | 21.4 | 50 | F         | F        | F         | F        | 78.<br>4   | 15.<br>7 | 50     | F         | F        | F         | F    | 106.<br>8 | 17.<br>7 |
| Hexazinone              | 1  | 10<br>8.0 | 4.3      | 100.<br>4 | 3.<br>4  | 88.<br>6  | 4.8      | 1  | 110.<br>1 | 1.8 | 100.<br>0 | 3.1      | 91.<br>8  | 2.9  | 1  | 102.<br>6 | 1.4      | 98.8      | 2.8      | 86.<br>5   | 3.3      | 1      | 120.<br>5 | 4.5      | 112.<br>8 | 4.5  | 102.<br>0 | 2.1      |
| Hexythiazox             | 5  | 71.<br>4  | 7.2      | 77.8      | 20<br>.4 | 73.<br>7  | 6.5      | 5  | 80.3      | 1.3 | 63.6      | 22.<br>3 | 73.<br>9  | 11.4 | 5  | 128.<br>1 | 31.<br>9 | 89.0      | 4.8      | 138<br>.6  | 6.8      | 5      | 77.0      | 28.<br>9 | 72.1      | 27.7 | 70.3      | 17.<br>0 |

|                                |    |           |          |           |          |          |          |    |           |          |           |          |           |      |    |           |          |           |          |           |          |    |           |          |           |      |           |          |
|--------------------------------|----|-----------|----------|-----------|----------|----------|----------|----|-----------|----------|-----------|----------|-----------|------|----|-----------|----------|-----------|----------|-----------|----------|----|-----------|----------|-----------|------|-----------|----------|
| Hymexazol                      | 5  | 13<br>8.1 | 24.<br>3 | 95.9      | 5.<br>1  | 93.<br>6 | 5.4      | 20 | F         | F        | 101.<br>0 | 2.2      | 93.<br>1  | 4.0  | 5  | 103.<br>7 | 10.<br>8 | 96.5      | 7.5      | 88.<br>9  | 2.6      | 20 | F         | F        | 102.<br>6 | 6.8  | 93.5      | 2.4      |
| Imazalil                       | 1  | 81.<br>3  | 5.8      | 74.5      | 5.<br>0  | 74.<br>6 | 4.9      | 1  | 83.3      | 3.1      | 74.0      | 2.2      | 71.<br>8  | 2.9  | 1  | 80.4      | 4.1      | 81.9      | 2.6      | 72.<br>6  | 1.6      | 1  | 97.3      | 1.4      | 93.2      | 2.7  | 90.2      | 1.3      |
| Imazamox                       | 50 | F         | F        | F         | F        | 24.<br>7 | 10.<br>8 | 20 | F         | F        | 27.6      | 32.<br>0 | 33.<br>1  | 24.3 | 20 | F         | F        | 30.8      | 30.<br>6 | 35.<br>5  | 22.<br>0 | 50 | F         | F        | F         | F    | 19.5      | 13.<br>3 |
| Imazapic                       | 5  | 20.<br>9  | 8.6      | 22.6      | 1.<br>0  | 23.<br>7 | 8.6      | 20 | F         | F        | 30.1      | 31.<br>9 | 35.<br>6  | 27.5 | 5  | 25.6      | 7.8      | 32.0      | 25.<br>1 | 35.<br>8  | 19.<br>7 | 5  | 7.3       | 12.<br>6 | 11.7      | 12.9 | 19.8      | 10.<br>4 |
| Imazapyr                       | 5  | 10.<br>0  | 12.<br>6 | 12.9      | 1.<br>7  | 14.<br>2 | 12.<br>1 | 20 | F         | F        | 18.4      | 30.<br>2 | 25.<br>1  | 23.7 | 10 | F         | F        | 21.6      | 36.<br>9 | 25.<br>8  | 27.<br>0 | 5  | 4.1       | 8.5      | 6.4       | 15.2 | 12.3      | 15.<br>1 |
| Imazaquin                      | 5  | 25.<br>7  | 14.<br>5 | 26.5      | 3.<br>9  | 29.<br>5 | 8.7      | 50 | F         | F        | F         | F        | 43.<br>9  | 15.1 | 20 | F         | F        | 41.3      | 25.<br>6 | 44.<br>4  | 16.<br>3 | 5  | 66.1      | 2.4      | 28.7      | 4.2  | 25.0      | 24.<br>7 |
| Imazethapyr                    | 5  | 26.<br>9  | 8.2      | 28.0      | 3.<br>7  | 29.<br>2 | 10.<br>0 | 5  | 35.4      | 28.<br>5 | 35.8      | 26.<br>0 | 43.<br>2  | 18.1 | 1  | 33.6      | 7.6      | 42.2      | 20.<br>0 | 45.<br>1  | 17.<br>5 | 20 | F         | F        | 17.4      | 9.0  | 26.7      | 13.<br>7 |
| Imidacloprid                   | 5  | 10<br>1.1 | 7.8      | 108.<br>2 | 2.<br>8  | 96.<br>7 | 1.5      | 5  | 119.<br>4 | 2.7      | 110.<br>9 | 8.2      | 109<br>.0 | 6.6  | 5  | 99.3      | 4.1      | 105.<br>9 | 2.9      | 104<br>.1 | 3.0      | 1  | 106.<br>2 | 7.3      | 102.<br>2 | 4.5  | 98.3      | 1.7      |
| Imidaclothiz                   | 10 | F         | F        | 102.<br>9 | 4.<br>7  | 91.<br>3 | 1.6      | 10 | F         | F        | 115.<br>5 | 8.3      | 104<br>.8 | 11.2 | 20 | F         | F        | 114.<br>0 | 6.6      | 88.<br>4  | 4.5      | 20 | F         | F        | 115.<br>8 | 8.3  | 110.<br>9 | 1.9      |
| Indoxacarb                     | 5  | 82.<br>4  | 1.5      | 80.9      | 0.<br>6  | 72.<br>6 | 4.0      | 5  | 104.<br>0 | 1.4      | 93.3      | 3.7      | 92.<br>5  | 10.3 | 1  | 110.<br>2 | 4.2      | 98.3      | 2.5      | 88.<br>6  | 14.<br>0 | 20 | F         | F        | 99.6      | 6.8  | 95.3      | 2.9      |
| Iodosulfuron-<br>methyl-Sodium | 1  | 52.<br>8  | 26.<br>8 | 62.2      | 11<br>.9 | 75.<br>0 | 2.5      | 1  | F         | F        | F         | F        | F         | F    | 1  | F         | F        | F         | F        | F         | F        | 20 | F         | F        | 60.0      | 19.0 | 84.0      | 11.<br>2 |
| Ipconazole                     | 5  | 86.<br>7  | 8.6      | 81.9      | 5.<br>3  | 87.<br>1 | 1.8      | 20 | F         | F        | 85.6      | 5.2      | 89.<br>8  | 4.2  | 5  | 99.4      | 5.3      | 96.6      | 3.4      | 91.<br>9  | 1.9      | 1  | 89.1      | 8.1      | 89.6      | 6.4  | 90.6      | 2.4      |
| Iprobenfos                     | 1  | 10<br>3.3 | 4.9      | 97.1      | 4.<br>2  | 91.<br>7 | 3.5      | 1  | 107.<br>2 | 0.6      | 101.<br>4 | 1.9      | 95.<br>4  | 5.4  | 5  | 106.<br>4 | 1.4      | 98.7      | 5.0      | 92.<br>4  | 3.0      | 5  | 109.<br>6 | 3.5      | 102.<br>0 | 2.0  | 96.4      | 1.3      |

|                                       |    |       |     |       |      |       |      |    |       |     |       |      |       |      |    |       |      |       |      |       |      |    |       |      |       |      |       |      |
|---------------------------------------|----|-------|-----|-------|------|-------|------|----|-------|-----|-------|------|-------|------|----|-------|------|-------|------|-------|------|----|-------|------|-------|------|-------|------|
| Iprodione                             | 10 | F     | F   | 33.8  | 66.8 | 56.6  | 32.9 | 10 | F     | F   | 46.4  | 22.9 | 77.3  | 38.5 | 10 | F     | F    | 96.4  | 36.2 | 90.8  | 28.4 | NA | F     | F    | F     | F    | F     | F    |
| Isazophos                             | 1  | 92.7  | 6.9 | 89.4  | 2.2  | 82.7  | 3.6  | 1  | 104.6 | 4.9 | 100.6 | 2.9  | 92.6  | 2.1  | 1  | 94.3  | 4.2  | 94.1  | 1.6  | 85.7  | 0.7  | 1  | 116.9 | 0.6  | 110.4 | 4.1  | 106.5 | 5.4  |
| Isocarbophos                          | 20 | F     | F   | 115.6 | 4.3  | 98.4  | 1.1  | 20 | F     | F   | 101.5 | 10.4 | 96.6  | 4.4  | 20 | F     | F    | 105.8 | 3.4  | 97.4  | 3.4  | 20 | F     | F    | 118.8 | 3.8  | 106.8 | 6.9  |
| Isofenphos-methyl                     | 50 | F     | F   | F     | F    | 104.4 | 3.4  | 10 | F     | F   | 139.5 | 3.4  | 117.2 | 5.9  | 5  | 144.3 | 11.9 | 123.9 | 3.2  | 109.4 | 4.3  | 5  | 112.8 | 13.1 | 129.2 | 8.7  | 122.6 | 10.3 |
| Isoprocarb                            | 1  | 114.3 | 3.8 | 99.5  | 4.3  | 93.1  | 2.5  | 1  | 119.0 | 2.5 | 96.0  | 1.9  | 91.1  | 2.0  | 1  | 101.9 | 6.5  | 102.8 | 1.9  | 91.0  | 2.0  | 1  | 117.2 | 2.3  | 100.1 | 1.1  | 93.4  | 3.7  |
| Isopropyl-N-(3-chlorophenyl)carbamate | NA | F     | F   | F     | F    | F     | F    | 50 | F     | F   | F     | F    | 52.4  | 13.9 | 50 | F     | F    | F     | F    | 52.4  | 13.9 | 20 | F     | F    | 113.9 | 2.9  | 53.3  | 18.8 |
| Isoprothiolane                        | 1  | 83.0  | 4.0 | 78.9  | 5.5  | 73.7  | 2.0  | 1  | 102.0 | 1.5 | 86.6  | 10.2 | 89.5  | 2.8  | 1  | 91.2  | 2.1  | 82.8  | 2.3  | 79.1  | 1.5  | 1  | 110.6 | 3.6  | 105.7 | 4.4  | 97.4  | 1.5  |
| Isoproturon                           | 1  | 105.4 | 0.7 | 97.6  | 1.5  | 91.7  | 1.1  | 1  | 117.1 | 0.9 | 101.1 | 2.2  | 93.3  | 1.0  | 1  | 106.7 | 2.9  | 100.1 | 2.9  | 92.9  | 1.4  | 1  | 115.2 | 1.0  | 106.8 | 1.7  | 99.1  | 4.6  |
| Isopyrazam                            | 5  | 98.4  | 8.7 | 108.0 | 3.4  | 99.4  | 1.0  | 1  | 108.6 | 0.9 | 109.9 | 5.7  | 103.2 | 5.6  | 5  | 108.9 | 3.4  | 110.9 | 3.5  | 103.0 | 1.4  | 1  | 106.1 | 1.1  | 102.2 | 6.1  | 100.1 | 2.3  |
| Isoxaflutole                          | 20 | F     | F   | 90.8  | 2.5  | 87.8  | 4.4  | 20 | F     | F   | 89.4  | 3.5  | 85.8  | 4.7  | 5  | 86.7  | 3.6  | 92.7  | 1.9  | 90.3  | 2.1  | 5  | 100.9 | 2.7  | 105.4 | 4.8  | 101.2 | 5.3  |
| Kresoxim-methyl                       | 20 | F     | F   | 118.5 | 6.1  | 102.3 | 1.4  | 20 | F     | F   | 120.8 | 3.1  | 106.0 | 5.1  | 20 | 123.8 | 2.6  | 123.6 | 1.7  | 102.2 | 2.4  | 50 | 100.1 | 28.4 | 129.5 | 13.3 | 109.7 | 2.5  |
| Lactofen                              | 5  | 107.5 | 8.9 | 98.3  | 4.6  | 86.0  | 2.4  | 5  | 104.2 | 1.8 | 95.1  | 2.0  | 89.1  | 8.7  | 1  | 95.5  | 6.5  | 99.7  | 5.9  | 91.1  | 2.4  | 50 | F     | F    | F     | F    | 74.8  | 17.3 |
| Lufenuron                             | 50 | F     | F   | F     | F    | 70.   | 8.7  | 20 | F     | F   | 102.  | 5.9  | 106   | 1.5  | 5  | 93.0  | 10.  | 89.5  | 7.6  | 82.   | 10.  | 5  | 84.2  | 9.0  | 98.9  | 19.9 | 96.3  | 4.2  |





|                      |    |           |      |       |     |      |     |    |       |     |       |      |       |      |    |       |     |       |     |       |     |    |       |     |       |     |       |      |
|----------------------|----|-----------|------|-------|-----|------|-----|----|-------|-----|-------|------|-------|------|----|-------|-----|-------|-----|-------|-----|----|-------|-----|-------|-----|-------|------|
|                      |    | 5         |      | 1     | 4   | 1    |     |    | 3     |     | 0     |      | .5    |      |    | 1     |     | 7     |     | 2     |     |    | 4     |     | 1     |     | 3     |      |
| Metazosulfuron       | 50 | F         | F    | F     | F   | 67.5 | 2.5 | 20 | F     | F   | 52.7  | 13.8 | 59.9  | 10.5 | 50 | F     | F   | F     | F   | 72.8  | 2.1 | 50 | F     | F   | F     | F   | 64.9  | 10.7 |
| Methamidophos        | 1  | F         | F    | F     | F   | F    | F   | 1  | F     | F   | F     | F    | F     | F    | 1  | F     | F   | F     | F   | F     | F   | 1  | 66.6  | 1.5 | 62.1  | 3.2 | 62.6  | 0.5  |
| Methidathion         | 1  | 10<br>1.4 | 0.8  | 92.7  | 3.1 | 89.1 | 5.1 | 1  | 105.0 | 1.6 | 94.8  | 1.1  | 89.7  | 2.6  | 1  | 101.2 | 3.4 | 94.0  | 2.5 | 88.4  | 2.4 | 5  | 102.1 | 2.5 | 97.7  | 1.4 | 92.1  | 3.9  |
| Methiocarb sulfone   | 20 | F         | F    | 105.3 | 2.0 | 92.2 | 2.8 | 5  | 124.9 | 5.8 | 112.8 | 5.2  | 99.1  | 2.8  | 1  | 99.6  | 1.2 | 100.3 | 4.4 | 89.6  | 0.7 | 5  | 126.2 | 3.3 | 117.5 | 2.4 | 107.0 | 2.5  |
| Methiocarb sulfoxide | 1  | 10<br>3.5 | 7.2  | 100.8 | 0.5 | 88.8 | 1.3 | 1  | 117.7 | 4.2 | 105.0 | 4.4  | 99.7  | 6.0  | 1  | 103.2 | 3.8 | 101.1 | 2.9 | 90.7  | 0.4 | 1  | 111.8 | 2.1 | 104.4 | 4.0 | 95.9  | 2.7  |
| Methiocarb           | 5  | 94.2      | 6.9  | 90.9  | 3.2 | 80.8 | 3.5 | 5  | 103.8 | 2.3 | 103.5 | 3.7  | 92.9  | 1.9  | 1  | 105.8 | 0.5 | 98.3  | 1.1 | 89.0  | 2.0 | 50 | F     | F   | F     | F   | 91.8  | 9.6  |
| Methomyl             | 20 | F         | F    | 104.7 | 2.3 | 92.5 | 2.8 | 20 | F     | F   | 115.0 | 7.4  | 100.6 | 5.1  | 20 | F     | F   | 90.3  | 7.5 | 81.2  | 5.2 | 10 | F     | F   | 120.2 | 3.1 | 106.4 | 5.0  |
| Methoxyfenozid e     | 5  | 58.8      | 12.9 | 78.4  | 3.0 | 78.8 | 4.0 | 5  | 84.8  | 2.9 | 91.9  | 3.8  | 85.1  | 3.5  | 5  | 79.2  | 3.6 | 86.6  | 3.4 | 83.5  | 1.9 | 5  | 115.7 | 7.9 | 112.8 | 4.9 | 111.9 | 4.1  |
| Metolachlor          | 1  | 10<br>4.9 | 4.9  | 99.4  | 4.1 | 88.3 | 1.5 | 1  | 112.2 | 1.4 | 105.6 | 1.2  | 94.9  | 4.4  | 1  | 111.0 | 6.1 | 103.1 | 2.6 | 95.1  | 4.9 | 1  | 119.2 | 2.6 | 114.5 | 4.5 | 107.6 | 3.1  |
| Metrafenone          | 1  | 97.8      | 11.5 | 102.2 | 4.2 | 95.5 | 1.5 | 5  | 105.9 | 1.0 | 107.0 | 7.9  | 100.8 | 2.2  | 1  | 110.4 | 1.8 | 113.1 | 1.7 | 102.0 | 1.2 | 10 | F     | F   | 95.5  | 8.5 | 92.0  | 3.4  |
| Metribuzin           | 1  | 10<br>2.1 | 4.9  | 89.8  | 4.2 | 86.7 | 4.6 | 1  | 111.4 | 0.9 | 93.7  | 1.5  | 90.9  | 2.6  | 1  | 102.6 | 0.5 | 93.7  | 2.5 | 86.8  | 2.2 | 1  | 96.4  | 4.3 | 93.7  | 2.3 | 90.0  | 3.5  |
| Metsulfuron-methyl   | 5  | 57.1      | 9.6  | 56.6  | 1.7 | 69.7 | 3.2 | 20 | F     | F   | 70.2  | 10.1 | 79.6  | 5.7  | 5  | 67.8  | 2.8 | 78.4  | 9.6 | 80.7  | 4.2 | 50 | F     | F   | F     | F   | 69.9  | 9.8  |
| Molinate             | 5  | 86.8      | 0.6  | 85.7  | 3.5 | 82.2 | 1.8 | 5  | 95.8  | 2.5 | 90.6  | 3.4  | 85.5  | 1.2  | 5  | 91.9  | 3.6 | 93.3  | 6.4 | 86.2  | 1.2 | 5  | 84.3  | 9.8 | 101.4 | 4.0 | 98.6  | 4.0  |

|                             |    |           |          |           |          |           |          |    |           |          |           |          |           |      |         |           |          |           |          |           |          |    |           |          |           |      |           |          |
|-----------------------------|----|-----------|----------|-----------|----------|-----------|----------|----|-----------|----------|-----------|----------|-----------|------|---------|-----------|----------|-----------|----------|-----------|----------|----|-----------|----------|-----------|------|-----------|----------|
| Monocrotophos               | 5  | 13<br>0.6 | 3.4      | 106.<br>0 | 1.<br>9  | 87.<br>4  | 0.3      | 1  | 110.<br>2 | 0.9      | 93.3      | 5.5      | 92.<br>8  | 6.4  | 5       | 86.7      | 3.3      | 78.6      | 11.<br>6 | 67.<br>9  | 10.<br>0 | 1  | 119.<br>1 | 0.5      | 108.<br>7 | 2.8  | 89.3      | 12.<br>7 |
| Monosulfuron                | 20 | F         | F        | 47.4      | 7.<br>9  | 51.<br>3  | 6.0      | 1  | 54.9      | 25.<br>5 | 52.6      | 22.<br>8 | 58.<br>9  | 19.9 | 10<br>0 | F         | F        | F         | F        | F         | F        | 50 | F         | F        | F         | F    | 49.7      | 17.<br>9 |
| Moroxydinehydr<br>ochloride | 20 | F         | F        | 15.8      | 3.<br>2  | 15.<br>1  | 2.9      | 1  | 9.8       | 31.<br>0 | 7.8       | 40.<br>0 | 7.7       | 66.5 | 5       | 14.5      | 37.<br>2 | 9.0       | 37.<br>6 | 10.<br>5  | 39.<br>5 | 1  | 44.3      | 5.5      | 26.0      | 13.1 | 19.3      | 40.<br>3 |
| Myclobutanil                | 5  | 10<br>4.5 | 6.1      | 94.0      | 2.<br>3  | 87.<br>8  | 2.2      | 5  | 103.<br>3 | 1.9      | 99.5      | 2.5      | 93.<br>8  | 5.6  | 1       | 99.7      | 1.5      | 98.9      | 1.4      | 90.<br>6  | 1.9      | 5  | 133.<br>1 | 1.8      | 111.<br>3 | 2.5  | 102.<br>1 | 1.9      |
| Napropamide                 | 1  | 10<br>3.9 | 7.1      | 105.<br>2 | 3.<br>4  | 97.<br>1  | 1.9      | 1  | 106.<br>2 | 0.9      | 108.<br>0 | 4.3      | 103<br>.2 | 1.8  | 1       | 107.<br>8 | 12.<br>7 | 104.<br>4 | 2.6      | 100<br>.1 | 6.9      | 1  | 106.<br>0 | 1.6      | 104.<br>1 | 6.3  | 101.<br>0 | 3.7      |
| Nicosulfuron                | 5  | 29.<br>4  | 30.<br>3 | 29.6      | 7.<br>8  | 41.<br>8  | 4.0      | 50 | F         | F        | F         | F        | 46.<br>4  | 4.4  | 50      | F         | F        | F         | F        | 50.<br>9  | 6.9      | 20 | F         | F        | 18.8      | 11.0 | 37.5      | 16.<br>4 |
| Nicotine                    | 1  | 95.<br>5  | 3.6      | 94.3      | 36<br>.4 | 37.<br>4  | 25.<br>3 | 1  | 117.<br>4 | 1.9      | 98.8      | 22.<br>4 | 43.<br>4  | 31.9 | 1       | 166.<br>3 | 4.7      | 95.0      | 32.<br>2 | 37.<br>3  | 41.<br>7 | 1  | 131.<br>5 | 7.1      | 124.<br>4 | 14.4 | 62.2      | 42.<br>7 |
| Novaluron                   | 1  | 12<br>6.3 | 10.<br>5 | 132.<br>5 | 0.<br>7  | 119<br>.5 | 0.3      | 1  | 134.<br>8 | 4.0      | 129.<br>4 | 6.6      | 116<br>.0 | 4.8  | 1       | 114.<br>3 | 5.6      | 114.<br>2 | 8.0      | 106<br>.3 | 4.6      | 1  | 112.<br>9 | 2.1      | 113.<br>2 | 4.6  | 103.<br>2 | 5.1      |
| Dimethoate<br>oxon          | 1  | 10<br>0.4 | 3.5      | 102.<br>3 | 0.<br>6  | 90.<br>7  | 1.7      | 1  | 113.<br>7 | 1.1      | 110.<br>8 | 5.0      | 104<br>.3 | 2.7  | 5       | 109.<br>8 | 2.7      | 95.8      | 7.3      | 92.<br>4  | 0.8      | 1  | 114.<br>4 | 2.9      | 105.<br>0 | 4.0  | 96.6      | 0.3      |
| Orthosulfamuron             | 50 | F         | F        | F         | F        | 95.<br>3  | 4.4      | 20 | F         | F        | 92.2      | 9.2      | 90.<br>1  | 13.2 | 20      | F         | F        | 101.<br>0 | 13.<br>7 | 95.<br>0  | 3.5      | 5  | 60.3      | 11.<br>1 | 83.0      | 6.0  | 88.4      | 7.5      |
| Oxadiargyl                  | 5  | 79.<br>1  | 21.<br>0 | 81.2      | 3.<br>5  | 72.<br>4  | 3.2      | 20 | F         | F        | 103.<br>3 | 7.2      | 94.<br>9  | 10.3 | 20      | F         | F        | 100.<br>0 | 3.6      | 94.<br>2  | 1.7      | 5  | 98.0      | 5.0      | 94.8      | 3.5  | 94.4      | 6.1      |
| Oxadiazon                   | 20 | F         | F        | 97.9      | 5.<br>6  | 84.<br>4  | 1.9      | 20 | F         | F        | 106.<br>1 | 7.1      | 104<br>.4 | 2.3  | 5       | 97.6      | 1.0      | 106.<br>8 | 1.0      | 99.<br>1  | 3.0      | 10 | F         | F        | 93.2      | 8.0  | 92.3      | 5.4      |
| Oxadixyl                    | 5  | 10<br>3.9 | 12.<br>2 | 113.<br>6 | 1.<br>1  | 105<br>.4 | 4.0      | 1  | 118.<br>2 | 2.9      | 114.<br>3 | 12.<br>2 | 103<br>.7 | 7.0  | 5       | 101.<br>0 | 6.5      | 105.<br>5 | 3.4      | 97.<br>7  | 1.9      | 5  | 101.<br>8 | 5.8      | 107.<br>1 | 9.1  | 101.<br>2 | 1.3      |

|                       |    |           |          |           |         |           |     |        |           |     |           |     |           |     |        |           |          |           |          |           |          |    |           |     |           |      |           |          |   |
|-----------------------|----|-----------|----------|-----------|---------|-----------|-----|--------|-----------|-----|-----------|-----|-----------|-----|--------|-----------|----------|-----------|----------|-----------|----------|----|-----------|-----|-----------|------|-----------|----------|---|
| Oxamyl                | 5  | 13<br>8.6 | 7.4      | 119.<br>8 | 3.<br>7 | 99.<br>1  | 0.3 | 5      | 148.<br>3 | 3.2 | 118.<br>9 | 4.1 | 104<br>.0 | 9.2 | 5      | 126.<br>0 | 8.4      | 106.<br>5 | 12.<br>9 | 98.<br>9  | 3.8      | 5  | 157.<br>0 | 4.4 | 128.<br>2 | 4.4  | 108.<br>4 | 2.0      |   |
| Oxaziclomefone        | 1  | 10<br>9.6 | 8.7      | 116.<br>8 | 3.<br>0 | 104<br>.3 | 2.2 | 1      | 113.<br>8 | 1.0 | 115.<br>4 | 5.4 | 105<br>.2 | 2.0 | 1      | 99.6      | 2.5      | 101.<br>7 | 1.6      | 96.<br>1  | 2.6      | 1  | 120.<br>9 | 6.0 | 118.<br>1 | 3.2  | 110.<br>4 | 0.1      |   |
| OxiMinoOxaMy<br>l     | 5  | 10<br>2.4 | 1.0      | 106.<br>6 | 2.<br>0 | 94.<br>6  | 1.4 | 1      | 122.<br>6 | 5.0 | 115.<br>0 | 6.6 | 110<br>.4 | 3.5 | 1      | 108.<br>5 | 9.1      | 94.7      | 3.9      | 99.<br>2  | 2.3      | 1  | 125.<br>6 | 5.0 | 118.<br>1 | 5.5  | 107.<br>5 | 2.2      |   |
| Oxycarboxin           | NA | F         | F        | F         | F       | F         | F   | N<br>A | F         | F   | F         | F   | F         | F   | 5      | 154.<br>3 | 15.<br>4 | 147.<br>8 | 28.<br>1 | 86.<br>4  | 45.<br>0 | 5  | 84.1      | 5.8 | 24.6      | 48.6 | 67.0      | 27.<br>2 |   |
| Oxydemeton-<br>methyl | 1  | 10<br>3.0 | 3.7      | 94.2      | 1.<br>6 | 85.<br>0  | 0.4 | 1      | 109.<br>0 | 1.7 | 95.4      | 1.1 | 89.<br>6  | 0.8 | 1      | 100.<br>8 | 1.7      | 87.5      | 2.8      | 82.<br>2  | 2.4      | 1  | 108.<br>2 | 0.7 | 95.9      | 2.0  | 87.3      | 2.0      |   |
| Paclobutrazol         | 1  | 10<br>0.4 | 1.7      | 105.<br>3 | 3.<br>0 | 100<br>.9 | 1.1 | 5      | 108.<br>2 | 3.0 | 111.<br>0 | 5.7 | 109<br>.4 | 3.8 | 5      | 118.<br>6 | 2.5      | 108.<br>4 | 6.5      | 101<br>.1 | 0.9      | 5  | 100.<br>7 | 3.9 | 102.<br>1 | 4.3  | 102.<br>2 | 2.6      |   |
| Parathion-<br>methyl  | NA | F         | F        | F         | F       | F         | F   | N<br>A | F         | F   | F         | F   | F         | F   | N<br>A | F         | F        | F         | F        | F         | F        | F  | N<br>A    | F   | F         | F    | F         | F        | F |
| Parathion             | NA | F         | F        | F         | F       | F         | F   | N<br>A | F         | F   | F         | F   | F         | F   | N<br>A | F         | F        | F         | F        | F         | F        | F  | N<br>A    | F   | F         | F    | F         | F        | F |
| Penconazole           | 1  | 11<br>6.2 | 1.4      | 110.<br>1 | 4.<br>8 | 97.<br>3  | 2.7 | 1      | 119.<br>2 | 3.1 | 103.<br>3 | 1.8 | 96.<br>1  | 1.3 | 5      | 118.<br>1 | 1.2      | 110.<br>8 | 6.9      | 97.<br>8  | 1.7      | 10 | F         | F   | 110.<br>4 | 8.2  | 99.7      | 0.7      |   |
| Pendimethalin         | 1  | 91.<br>8  | 5.9      | 92.0      | 9.<br>4 | 87.<br>9  | 3.6 | 5      | 88.0      | 0.2 | 88.0      | 3.0 | 84.<br>2  | 7.8 | 5      | 85.2      | 3.1      | 96.2      | 9.8      | 87.<br>6  | 3.7      | 5  | 102.<br>2 | 6.8 | 99.3      | 7.5  | 100.<br>5 | 4.2      |   |
| Penoxsulam            | 5  | 90.<br>7  | 10.<br>3 | 89.3      | 1.<br>1 | 95.<br>9  | 3.6 | 5      | 93.4      | 5.3 | 83.6      | 3.0 | 90.<br>4  | 5.0 | 5      | 89.0      | 3.0      | 99.1      | 7.1      | 90.<br>8  | 2.2      | 5  | 68.9      | 9.5 | 73.9      | 7.7  | 85.9      | 3.1      |   |
| Penthiopyrad          | 1  | 11<br>2.0 | 7.5      | 112.<br>4 | 0.<br>4 | 100<br>.7 | 2.4 | 1      | 122.<br>5 | 0.7 | 116.<br>5 | 9.0 | 107<br>.7 | 3.8 | 1      | 118.<br>6 | 4.2      | 120.<br>3 | 4.7      | 106<br>.3 | 1.6      | 5  | 111.<br>2 | 6.9 | 109.<br>0 | 11.9 | 104.<br>5 | 2.7      |   |
| Phenamacril           | 1  | 96.<br>6  | 4.9      | 90.4      | 2.<br>9 | 85.<br>9  | 2.0 | 1      | 112.<br>0 | 1.9 | 95.9      | 4.2 | 90.<br>0  | 1.2 | 1      | 101.<br>1 | 4.0      | 91.0      | 2.0      | 84.<br>9  | 2.2      | 5  | 109.<br>0 | 3.1 | 94.7      | 4.4  | 90.7      | 3.8      |   |

|                             |    |       |      |       |      |       |      |    |       |     |       |     |       |      |    |       |     |       |     |       |     |    |       |      |       |      |       |      |
|-----------------------------|----|-------|------|-------|------|-------|------|----|-------|-----|-------|-----|-------|------|----|-------|-----|-------|-----|-------|-----|----|-------|------|-------|------|-------|------|
| Phenazino-1-carboxylic acid | 1  | 81.2  | 0.8  | 77.2  | 6.5  | 73.7  | 2.8  | 1  | 94.0  | 2.0 | 84.0  | 2.8 | 82.0  | 4.1  | 1  | 78.2  | 2.4 | 76.7  | 3.3 | 70.9  | 3.1 | 5  | 68.5  | 1.2  | 64.0  | 0.6  | 65.4  | 3.7  |
| Phenmedipham                | 1  | 102.0 | 4.4  | 94.8  | 4.0  | 85.3  | 2.8  | 1  | 113.7 | 0.7 | 100.7 | 3.3 | 94.9  | 4.8  | 1  | 98.5  | 2.5 | 86.0  | 0.9 | 78.6  | 3.0 | 5  | 117.4 | 6.4  | 109.6 | 0.2  | 98.8  | 3.6  |
| Phenthoate                  | 5  | 126.8 | 12.5 | 128.0 | 5.0  | 114.2 | 2.0  | 5  | 134.8 | 2.4 | 122.7 | 3.8 | 114.8 | 3.9  | 5  | 131.5 | 3.6 | 126.7 | 2.9 | 113.2 | 0.9 | 5  | 128.4 | 2.3  | 123.3 | 5.3  | 116.3 | 4.3  |
| Phorate oxon sulfone        | NA | F     | F    | F     | F    | F     | F    | NA | F     | F   | F     | F   | F     | F    | NA | F     | F   | F     | F   | F     | F   | NA | F     | F    | F     | F    | F     | F    |
| Phorate oxon sulfone        | 1  | 120.1 | 10.4 | 117.7 | 2.3  | 103.5 | 1.5  | 1  | 136.8 | 2.3 | 118.5 | 9.6 | 107.5 | 7.7  | 5  | 106.3 | 1.3 | 101.0 | 4.5 | 90.6  | 1.5 | 5  | 119.7 | 1.9  | 103.7 | 7.3  | 95.8  | 3.0  |
| Phorate oxon                | 10 | F     | F    | 82.6  | 13.5 | 102.2 | 21.4 | 50 | F     | F   | F     | F   | 135.4 | 17.5 | 20 | F     | F   | 86.8  | 5.6 | 88.9  | 7.0 | 5  | 63.4  | 35.8 | 122.3 | 34.4 | 117.2 | 12.2 |
| Phorate sulfone             | 1  | 117.0 | 3.3  | 112.5 | 3.4  | 97.4  | 0.9  | 5  | 117.2 | 0.6 | 110.2 | 4.0 | 100.2 | 1.1  | 5  | 109.3 | 3.7 | 105.1 | 1.5 | 92.2  | 2.6 | 5  | 129.2 | 2.1  | 118.8 | 0.5  | 114.3 | 1.7  |
| Phorate sulfoxide           | 1  | 130.9 | 4.6  | 121.3 | 2.9  | 100.2 | 4.7  | 1  | 150.8 | 1.0 | 132.7 | 6.0 | 106.9 | 2.7  | 1  | 124.2 | 3.2 | 116.3 | 0.9 | 97.6  | 0.8 | 1  | 134.6 | 2.4  | 122.3 | 3.6  | 110.0 | 1.2  |
| Phorate                     | 10 | F     | F    | 38.8  | 4.5  | 68.5  | 9.4  | 50 | F     | F   | F     | F   | 62.7  | 7.2  | 50 | F     | F   | F     | F   | 92.6  | 1.2 | 50 | F     | F    | F     | F    | 83.0  | 7.5  |
| Phosalone                   | 5  | 73.8  | 5.9  | 87.8  | 4.6  | 79.5  | 2.4  | 1  | 110.6 | 1.8 | 105.8 | 6.0 | 102.5 | 2.8  | 5  | 105.4 | 4.0 | 109.3 | 1.7 | 99.8  | 2.6 | 5  | 103.6 | 7.1  | 102.4 | 10.4 | 97.8  | 1.4  |
| Phosfolan-methyl            | 1  | 101.7 | 2.0  | 90.8  | 2.7  | 84.1  | 3.2  | 1  | 105.7 | 0.6 | 95.0  | 5.6 | 90.6  | 4.8  | 1  | 96.9  | 2.4 | 89.1  | 5.1 | 80.7  | 2.7 | 1  | 113.3 | 0.6  | 101.6 | 1.7  | 94.0  | 3.6  |
| Phosfolan                   | 1  | 103.0 | 5.6  | 98.2  | 3.4  | 91.2  | 2.7  | 1  | 113.7 | 1.2 | 99.3  | 2.5 | 95.5  | 3.1  | 1  | 98.4  | 2.0 | 100.1 | 2.9 | 89.6  | 1.7 | 1  | 111.2 | 1.8  | 110.0 | 2.2  | 101.3 | 2.4  |
| Phosmet                     | 5  | 98.3  | 10.0 | 103.3 | 2.6  | 91.9  | 1.6  | 5  | 119.1 | 2.2 | 115.9 | 7.7 | 104.6 | 3.2  | 5  | 91.3  | 4.8 | 87.4  | 2.8 | 81.8  | 4.6 | 5  | 106.1 | 4.3  | 104.8 | 10.9 | 101.3 | 1.9  |

|                       |    |           |     |           |         |          |          |   |           |     |           |     |           |     |        |           |          |           |     |           |     |   |           |          |           |      |           |      |          |
|-----------------------|----|-----------|-----|-----------|---------|----------|----------|---|-----------|-----|-----------|-----|-----------|-----|--------|-----------|----------|-----------|-----|-----------|-----|---|-----------|----------|-----------|------|-----------|------|----------|
| Phosphamidon          | 1  | 10<br>3.6 | 6.6 | 101.<br>4 | 3.<br>8 | 91.<br>7 | 4.0      | 5 | 111.<br>0 | 1.8 | 105.<br>5 | 2.6 | 97.<br>6  | 3.6 | 5      | 104.<br>1 | 3.2      | 102.<br>0 | 2.5 | 91.<br>8  | 1.3 | 5 | 113.<br>2 | 2.2      | 110.<br>8 | 3.9  | 103.<br>1 | 2.5  |          |
| Phoxim                | 5  | 79.<br>2  | 3.2 | 77.1      | 5.<br>1 | 73.<br>3 | 2.9      | 5 | 95.5      | 5.6 | 91.4      | 2.7 | 88.<br>3  | 4.4 | 1      | 93.3      | 2.2      | 93.1      | 1.5 | 90.<br>6  | 2.9 | 5 | 95.0      | 6.6      | 89.2      | 2.0  | 94.0      | 0.6  |          |
| Phthalide             | 50 | F         | F   | F         | F       | 61.<br>4 | 1.7      | 1 | 133.<br>6 | 9.9 | 129.<br>6 | 8.3 | 100<br>.6 | 1.3 | 1      | 127.<br>1 | 11.<br>1 | 76.2      | 4.9 | 111<br>.0 | 4.7 | 1 | 154.<br>5 | 27.<br>2 | 113.<br>7 | 10.0 | 112.<br>7 | 7.6  |          |
| Picoxystrobin         | 1  | 94.<br>5  | 9.4 | 102.<br>0 | 4.<br>7 | 94.<br>5 | 1.5      | 1 | 111.<br>5 | 0.4 | 109.<br>3 | 7.6 | 101<br>.4 | 2.5 | 1      | 101.<br>8 | 2.9      | 107.<br>0 | 1.3 | 99.<br>2  | 4.6 | 1 | 117.<br>5 | 2.6      | 109.<br>2 | 5.7  | 109.<br>0 | 2.8  |          |
| Pinoxaden             | 1  | 85.<br>5  | 2.6 | 83.4      | 4.<br>9 | 80.<br>3 | 4.5      | 1 | 104.<br>2 | 1.4 | 98.3      | 4.3 | 94.<br>7  | 3.0 | 1      | 95.2      | 2.7      | 89.5      | 5.2 | 86.<br>4  | 1.9 | 1 | 87.0      | 3.5      | 81.3      | 7.1  | 89.2      | 1.5  |          |
| Piperonyl<br>butoxide | 1  | 10<br>6.8 | 4.3 | 102.<br>8 | 3.<br>2 | 89.<br>1 | 3.7      | 1 | 106.<br>3 | 1.5 | 97.9      | 2.6 | 96.<br>9  | 7.7 | 1      | 92.0      | 3.4      | 99.2      | 1.0 | 90.<br>2  | 3.2 | 5 | 124.<br>3 | 6.8      | 110.<br>5 | 3.6  | 101.<br>2 | 2.3  |          |
| Pirimicarb            | 1  | 95.<br>2  | 2.6 | 86.5      | 5.<br>3 | 83.<br>3 | 2.3      | 1 | 103.<br>8 | 3.4 | 92.9      | 1.8 | 86.<br>5  | 1.7 | 1      | 103.<br>9 | 1.7      | 88.5      | 2.9 | 82.<br>3  | 4.7 | 1 | 118.<br>9 | 1.6      | 103.<br>1 | 0.8  | 91.8      | 1.6  |          |
| Pirimiphos-<br>methyl | 1  | 87.<br>6  | 7.1 | 97.1      | 2.<br>7 | 87.<br>1 | 2.2      | 1 | 107.<br>9 | 1.9 | 109.<br>6 | 7.2 | 105<br>.0 | 1.5 | 1      | 98.8      | 4.4      | 101.<br>4 | 1.4 | 97.<br>0  | 1.3 | 1 | 103.<br>6 | 1.9      | 102.<br>3 | 4.1  | 105.<br>1 | 0.7  |          |
| Pretilachlor          | 5  | 91.<br>1  | 4.3 | 97.7      | 3.<br>4 | 91.<br>2 | 2.4      | 5 | 109.<br>0 | 2.6 | 109.<br>8 | 6.1 | 103<br>.9 | 5.4 | 5      | 96.4      | 3.3      | 100.<br>8 | 2.2 | 93.<br>9  | 1.7 | 5 | 103.<br>5 | 4.0      | 99.5      | 9.5  | 97.8      | 0.3  |          |
| Probenazole           | 20 | F         | F   | 85.1      | 6.<br>6 | 83.<br>2 | 1.8      | 5 | 96.2      | 2.2 | 90.1      | 3.3 | 87.<br>5  | 3.5 | 5      | 93.4      | 3.6      | 87.0      | 0.5 | 82.<br>9  | 1.9 | 5 | 87.2      | 1.8      | 81.6      | 3.0  | 78.6      | 2.4  |          |
| Prochloraz            | 1  | 81.<br>1  | 3.7 | 88.5      | 4.<br>0 | 81.<br>7 | 1.5      | 5 | 65.5      | 4.4 | 71.2      | 7.2 | 81.<br>9  | 0.3 | 5      | 89.1      | 2.0      | 94.0      | 2.9 | 90.<br>8  | 0.3 | 5 | 105.<br>6 | 2.9      | 103.<br>3 | 4.3  | 101.<br>2 | 1.6  |          |
| Profenophos           | 5  | 96.<br>0  | 8.2 | 112.<br>1 | F       | 99.<br>7 | F        | 5 | 113.<br>3 | 1.2 | 113.<br>0 | 6.1 | 107<br>.4 | 2.7 | 5      | 84.5      | 4.9      | 98.4      | 3.6 | 91.<br>9  | 2.8 | 5 | 117.<br>8 | 5.0      | 115.<br>6 | 8.0  | 107.<br>6 | 2.3  |          |
| Prohexadione          | 50 | F         | F   | F         | F       | 82.<br>3 | 66.<br>5 | 5 | 113.<br>3 | 1.2 | 113.<br>0 | 6.1 | 107<br>.4 | 2.7 | N<br>A | F         | F        | F         | F   | F         | F   | F | 50        | F        | F         | F    | F         | 87.6 | 43.<br>8 |

|                  |    |       |      |       |      |       |     |    |       |     |       |      |       |      |    |       |      |       |     |       |      |    |       |      |       |      |       |      |
|------------------|----|-------|------|-------|------|-------|-----|----|-------|-----|-------|------|-------|------|----|-------|------|-------|-----|-------|------|----|-------|------|-------|------|-------|------|
| Prometryn        | 1  | 97.9  | 8.0  | 95.6  | 5.4  | 84.2  | 0.7 | 1  | 107.2 | 1.4 | 97.4  | 5.2  | 90.0  | 1.4  | 1  | 98.4  | 0.7  | 97.8  | 1.6 | 90.2  | 1.2  | 5  | 119.0 | 2.6  | 111.0 | 6.3  | 108.4 | 2.7  |
| Propachlor       | 1  | 112.2 | 4.0  | 116.1 | 3.9  | 104.2 | 1.4 | 1  | 114.0 | 1.6 | 112.2 | 7.0  | 104.2 | 2.5  | 1  | 108.6 | 1.5  | 108.5 | 2.0 | 98.8  | 0.3  | 1  | 114.5 | 1.5  | 111.1 | 2.3  | 104.2 | 3.0  |
| Propamocarb      | 1  | 85.3  | 1.3  | 78.9  | 0.7  | 75.0  | 2.5 | 1  | 94.8  | 8.7 | 86.9  | 0.5  | 82.2  | 1.8  | 1  | 86.2  | F    | 76.5  | F   | 73.9  | 6.0  | 1  | 99.8  | 1.0  | 88.9  | 2.7  | 79.6  | 5.3  |
| Propanil         | 20 | F     | F    | 96.0  | 6.8  | 83.5  | 1.7 | 20 | F     | F   | 97.2  | 3.5  | 98.9  | 6.1  | 5  | 92.9  | 12.1 | 94.0  | 6.5 | 96.2  | 2.0  | 20 | F     | F    | 90.4  | 25.3 | 99.5  | 11.0 |
| Propargite       | 1  | 101.2 | 2.5  | 97.5  | 5.5  | 87.6  | 0.9 | 1  | 106.0 | 1.7 | 96.2  | 10.5 | 96.6  | 3.0  | 5  | 101.2 | 2.9  | 97.1  | 2.9 | 87.9  | 1.7  | 1  | 113.9 | 0.7  | 109.7 | 5.1  | 102.9 | 0.9  |
| Propiconazole    | 5  | 106.5 | 0.5  | 100.2 | 1.1  | 94.3  | 2.2 | 1  | 111.0 | 1.3 | 97.0  | 3.7  | 95.4  | 3.2  | 5  | 133.8 | 41.4 | 97.9  | 5.6 | 92.8  | 1.6  | 5  | 96.6  | 18.0 | 101.5 | 3.3  | 94.6  | 2.6  |
| Propisochlor     | 5  | 104.6 | 12.2 | 91.6  | 6.3  | 83.5  | 3.9 | 5  | 106.6 | 1.0 | 98.5  | 2.9  | 93.1  | 14.8 | 1  | 97.8  | 1.0  | 91.1  | 3.0 | 95.0  | 0.7  | 1  | 80.5  | 10.1 | 74.9  | 1.3  | 102.6 | 25.6 |
| Propyrisulfuron  | 20 | F     | F    | 89.4  | 5.7  | 88.6  | 3.3 | 50 | F     | F   | F     | F    | 88.5  | 7.1  | 50 | F     | F    | F     | F   | 97.0  | 5.7  | 50 | F     | F    | F     | F    | 89.3  | 3.8  |
| Propyzamide      | 5  | 78.6  | 11.5 | 82.0  | 5.5  | 74.8  | 4.2 | 1  | 111.4 | 3.5 | 106.1 | 2.4  | 95.2  | 8.1  | 5  | 91.4  | 1.6  | 89.7  | 1.4 | 82.9  | 6.3  | 5  | 104.8 | 4.6  | 108.7 | 11.5 | 113.4 | 0.4  |
| Prothioconazole  | 20 | F     | F    | 27.4  | 10.8 | 42.4  | 7.3 | 5  | 27.6  | 4.3 | 32.7  | 6.5  | 45.7  | 9.4  | 20 | F     | F    | 73.8  | 4.5 | 81.2  | 1.5  | 5  | 30.7  | 14.3 | 48.5  | 11.6 | 68.1  | 7.4  |
| Pymetrozine      | 20 | F     | F    | 65.1  | 5.4  | 58.4  | 1.0 | 50 | F     | F   | F     | F    | 39.7  | 65.3 | 50 | F     | F    | F     | F   | 48.6  | 45.5 | 5  | 88.6  | 6.0  | 69.4  | 9.0  | 54.9  | 41.9 |
| Pyraclostrobin   | 1  | 93.9  | 2.6  | 93.2  | 8.2  | 80.4  | 1.5 | 1  | 107.3 | 2.0 | 101.4 | 4.5  | 96.1  | 2.2  | 1  | 101.6 | 3.3  | 100.5 | 0.9 | 91.8  | 1.5  | 1  | 117.4 | 3.0  | 116.4 | 5.8  | 105.8 | 0.6  |
| Pyraflufen-ethyl | 1  | 104.6 | 7.8  | 106.8 | 4.8  | 97.2  | 4.7 | 20 | F     | F   | 109.5 | 5.4  | 105.6 | 0.9  | 5  | 113.3 | 4.1  | 111.1 | 3.5 | 105.8 | 0.6  | 5  | 103.3 | 7.3  | 100.2 | 9.8  | 98.6  | 3.0  |

|                      |    |           |     |           |          |           |          |    |           |          |           |          |           |      |    |           |          |           |          |           |          |    |           |          |           |      |           |           |
|----------------------|----|-----------|-----|-----------|----------|-----------|----------|----|-----------|----------|-----------|----------|-----------|------|----|-----------|----------|-----------|----------|-----------|----------|----|-----------|----------|-----------|------|-----------|-----------|
| Pyrametostrobin      | 1  | 13<br>8.2 | 0.4 | 121.<br>8 | 7.<br>7  | 105<br>.3 | 0.6      | 1  | 149.<br>7 | 0.2      | 117.<br>5 | 6.0      | 106<br>.0 | 3.8  | 1  | 146.<br>1 | 2.7      | 124.<br>9 | 6.1      | 104<br>.9 | 0.8      | 1  | 141.<br>3 | 1.7      | 124.<br>3 | 1.6  | 113.<br>5 | 4.1       |
| Pyraoxystrobin       | 1  | 96.<br>4  | 1.7 | 93.4      | 5.<br>2  | 90.<br>4  | 1.5      | 1  | 97.3      | 1.9      | 92.6      | 3.9      | 87.<br>5  | 4.0  | 1  | 102.<br>3 | 6.8      | 96.3      | 2.6      | 88.<br>3  | 1.1      | 5  | 94.4      | 2.7      | 90.0      | 6.9  | 85.8      | 1.6       |
| Pyrazosulfuron-ethyl | 10 | F         | F   | 77.6      | 29<br>.2 | 105<br>.5 | 5.4      | 5  | 86.0      | 13.<br>8 | 80.9      | 9.3      | 88.<br>0  | 7.9  | 5  | 85.2      | 2.1      | 95.9      | 4.9      | 94.<br>6  | 4.5      | 1  | 56.4      | 16.<br>1 | 68.6      | 7.9  | 85.3      | 4.4       |
| Pyrethrin 1          | 20 | F         | F   | 94.5      | 32<br>.2 | 93.<br>7  | 57.<br>4 | 50 | F         | F        | F         | F        | 175<br>.9 | 14.5 | 10 | F         | F        | 110.<br>5 | 24.<br>4 | 107<br>.2 | 39.<br>2 | 5  | 59.7      | 27.<br>2 | 16.1      | 7.9  | 26.7      | 113<br>.2 |
| Pyrethrin 2          | 10 | F         | F   | 74.6      | 29<br>.8 | 68.<br>1  | 12.<br>8 | 5  | 52.2      | 85.<br>2 | 75.3      | 53.<br>4 | 80.<br>6  | 17.9 | 50 | F         | F        | F         | F        | 142<br>.1 | 10.<br>1 | 50 | F         | F        | F         | F    | 123.<br>9 | 12.<br>8  |
| Pyribenzoxim         | 5  | 10<br>4.9 | 4.5 | 104.<br>6 | 3.<br>2  | 95.<br>4  | 0.7      | 5  | 104.<br>5 | 1.0      | 94.7      | 4.4      | 89.<br>6  | 9.7  | 5  | 97.3      | 6.9      | 108.<br>2 | 2.8      | 95.<br>4  | 2.7      | 5  | 115.<br>5 | 18.<br>9 | 118.<br>8 | 4.3  | 117.<br>5 | 3.2       |
| Pyridaben            | 1  | 93.<br>5  | 6.3 | 102.<br>7 | 6.<br>1  | 93.<br>1  | 1.2      | 1  | 105.<br>1 | 0.4      | 105.<br>4 | 6.7      | 101<br>.1 | 2.6  | 1  | 93.8      | 6.4      | 102.<br>1 | 4.1      | 95.<br>2  | 1.1      | 1  | 101.<br>8 | 0.1      | 101.<br>2 | 5.0  | 97.7      | 2.8       |
| Pyridalyl            | 1  | 84.<br>5  | 5.2 | 88.7      | 4.<br>7  | 78.<br>4  | 3.4      | 1  | 90.2      | 2.2      | 94.8      | 4.9      | 96.<br>1  | 2.2  | 5  | 90.8      | 18.<br>7 | 90.6      | 4.1      | 94.<br>9  | 4.9      | 5  | 102.<br>7 | 5.5      | 89.5      | 14.8 | 90.6      | 4.7       |
| Pyridaphenthion      | 1  | 11<br>0.1 | 6.8 | 112.<br>2 | 1.<br>0  | 98.<br>8  | 2.0      | 1  | 114.<br>3 | 2.4      | 112.<br>3 | 5.4      | 104<br>.5 | 2.5  | 5  | 109.<br>7 | 7.1      | 114.<br>0 | 3.6      | 106<br>.4 | 4.3      | 1  | 104.<br>7 | 0.3      | 103.<br>1 | 2.9  | 103.<br>9 | 2.4       |
| Pyriftalid           | 1  | 94.<br>7  | 4.8 | 91.1      | 4.<br>6  | 82.<br>2  | 0.5      | 1  | 115.<br>4 | 1.4      | 106.<br>0 | 4.9      | 93.<br>0  | 6.7  | 1  | 94.3      | 3.4      | 96.3      | 1.8      | 84.<br>6  | 2.7      | 1  | 124.<br>7 | 5.4      | 118.<br>8 | 5.5  | 108.<br>9 | 1.6       |
| Pyrimethanil         | 1  | 11<br>7.0 | 7.3 | 114.<br>3 | 2.<br>9  | 89.<br>4  | 0.1      | 1  | 103.<br>5 | 34.<br>8 | 71.7      | 9.8      | 69.<br>5  | 7.8  | 1  | 94.8      | 5.0      | 95.1      | 4.3      | 96.<br>6  | 2.5      | 1  | 91.6      | 3.5      | 110.<br>9 | 2.4  | 100.<br>3 | 1.2       |
| Pyrimorph            | 5  | 10<br>3.7 | 2.4 | 102.<br>0 | 2.<br>1  | 91.<br>8  | 3.9      | 1  | 102.<br>0 | 0.8      | 91.7      | 7.8      | 90.<br>4  | 4.3  | 5  | 95.1      | 5.9      | 95.7      | 7.0      | 89.<br>8  | 0.7      | 5  | 105.<br>9 | 16.<br>0 | 115.<br>5 | 6.0  | 107.<br>6 | 2.1       |
| Pyriproxyfen         | 5  | 79.<br>8  | 9.4 | 89.0      | 4.<br>7  | 82.<br>9  | 2.2      | 5  | 96.9      | 2.3      | 98.7      | 7.4      | 94.<br>2  | 3.9  | 5  | 97.1      | 1.9      | 101.<br>2 | 4.5      | 96.<br>8  | 1.2      | 1  | 103.<br>7 | 1.8      | 100.<br>2 | 3.1  | 100.<br>0 | 0.3       |



|                     |    |       |     |       |      |       |      |    |       |      |       |      |       |      |     |       |      |       |      |       |      |     |       |      |       |      |       |      |
|---------------------|----|-------|-----|-------|------|-------|------|----|-------|------|-------|------|-------|------|-----|-------|------|-------|------|-------|------|-----|-------|------|-------|------|-------|------|
| Pyrisoxazole        | 1  | 96.0  | 1.5 | 104.4 | 1.9  | 97.2  | 2.3  | 1  | 98.8  | 1.6  | 99.9  | 8.7  | 99.4  | 1.0  | 1   | 95.4  | 4.2  | 98.3  | 4.6  | 97.4  | 1.4  | 1   | 97.3  | 2.1  | 98.0  | 4.0  | 98.4  | 3.9  |
| Quinalphos          | 5  | 151.9 | 2.0 | 134.4 | 5.9  | 110.4 | 2.6  | 1  | 153.8 | 2.1  | 132.9 | 1.4  | 111.5 | 2.5  | 5   | 152.6 | 3.6  | 141.5 | 5.3  | 111.6 | 2.7  | 5   | 156.5 | 2.7  | 143.7 | 3.8  | 119.8 | 0.7  |
| Quinclorac          | 50 | F     | F   | F     | F    | 5.1   | 20.6 | 50 | F     | F    | F     | F    | 4.4   | 39.8 | 100 | F     | F    | F     | F    | F     | F    | 100 | F     | F    | F     | F    | F     | F    |
| Quinoxifen          | 1  | 90.7  | 6.2 | 88.8  | 4.0  | 80.0  | 2.3  | 1  | 94.1  | 1.9  | 93.6  | 2.1  | 87.6  | 6.4  | 1   | 88.2  | 1.1  | 90.8  | 4.3  | 84.3  | 0.8  | 1   | 105.8 | 6.2  | 99.6  | 5.6  | 95.4  | 2.1  |
| Quizalofop freeAcid | 20 | F     | F   | 8.2   | 13.9 | 16.4  | 13.1 | 5  | 7.6   | 26.7 | 12.0  | 15.9 | 20.0  | 11.3 | 10  | F     | F    | 13.2  | 37.6 | 23.8  | 10.8 | 20  | F     | F    | 4.4   | 62.2 | 15.8  | 35.8 |
| Quizalofop-ethyl    | 1  | 89.1  | 5.1 | 90.5  | 7.2  | 78.6  | 1.9  | 5  | 104.1 | 0.3  | 98.6  | 4.0  | 93.7  | 4.5  | 5   | 92.9  | 6.9  | 93.2  | 3.3  | 87.9  | 1.7  | 5   | 114.1 | 3.1  | 112.2 | 5.8  | 104.4 | 0.9  |
| Rimsulfuron         | 20 | F     | F   | 60.1  | 7.8  | 67.6  | 1.0  | 20 | F     | F    | 62.4  | 0.7  | 69.5  | 5.4  | 20  | F     | F    | 67.5  | 9.7  | 75.3  | 9.2  | 5   | 32.3  | 10.5 | 44.2  | 10.6 | 65.8  | 9.0  |
| Rotenone            | 5  | 107.3 | 3.5 | 69.4  | 1.9  | 74.9  | 18.4 | 5  | 100.7 | 4.6  | 104.5 | 19.2 | 111.4 | 14.5 | 5   | 97.2  | 6.0  | 84.8  | 19.0 | 102.6 | 27.8 | 20  | F     | F    | 103.9 | 6.4  | 97.8  | 1.6  |
| Saflufenacil        | NA | F     | F   | F     | F    | F     | F    | 50 | F     | F    | F     | F    | 95.6  | 5.6  | NA  | F     | F    | F     | F    | F     | F    | NA  | F     | F    | F     | F    | F     | F    |
| Sedaxane            | 1  | 99.5  | 3.7 | 91.4  | 2.6  | 82.4  | 2.6  | 5  | 107.7 | 2.1  | 96.7  | 1.5  | 91.4  | 2.3  | 5   | 101.0 | 9.1  | 93.8  | 2.6  | 89.1  | 3.9  | 5   | 107.0 | 1.1  | 99.5  | 1.4  | 95.9  | 5.2  |
| Sethoxydim          | 5  | 29.1  | 4.3 | 30.7  | 6.9  | 52.6  | 5.6  | 5  | 10.3  | 3.4  | 9.1   | 7.8  | 35.7  | 9.5  | 5   | 55.3  | 54.2 | 54.1  | 5.6  | 66.9  | 3.3  | 5   | 102.2 | 6.0  | 123.2 | 2.9  | 97.3  | 3.8  |
| Silthiofam          | 5  | 105.2 | 6.6 | 113.6 | 3.9  | 103.6 | 1.3  | 1  | 115.7 | 1.6  | 116.8 | 4.3  | 111.9 | 6.4  | 5   | 114.0 | 9.1  | 113.8 | 1.5  | 102.7 | 2.1  | 5   | 116.8 | 2.1  | 110.1 | 4.4  | 105.9 | 1.9  |
| Simazine            | 5  | 107.8 | 4.0 | 100.4 | 0.5  | 88.9  | 0.8  | 5  | 111.1 | 7.3  | 102.6 | 6.0  | 95.4  | 2.2  | 5   | 108.1 | 3.1  | 97.2  | 2.2  | 86.7  | 4.1  | 5   | 125.2 | 13.4 | 111.4 | 13.5 | 115.6 | 5.4  |

|                 |     |       |     |       |     |      |      |    |       |     |       |     |       |      |    |       |     |       |     |       |      |    |       |     |       |     |       |      |
|-----------------|-----|-------|-----|-------|-----|------|------|----|-------|-----|-------|-----|-------|------|----|-------|-----|-------|-----|-------|------|----|-------|-----|-------|-----|-------|------|
| Simetryn        | 1   | 90.8  | 3.9 | 84.8  | 2.8 | 78.6 | 1.4  | 1  | 106.1 | 2.3 | 91.8  | 3.9 | 87.8  | 0.9  | 1  | 91.3  | 3.7 | 83.2  | 4.0 | 76.4  | 1.8  | 1  | 111.0 | 0.8 | 101.9 | 3.9 | 95.1  | 2.1  |
| Spinetoram      | 5   | 72.5  | 2.2 | 80.4  | 8.9 | 71.0 | 2.6  | 5  | 84.7  | 1.3 | 81.2  | 2.9 | 85.4  | 3.9  | 5  | 79.6  | 1.8 | 80.4  | 2.6 | 80.0  | 2.4  | 5  | 97.7  | 2.3 | 93.1  | 3.2 | 90.0  | 1.7  |
| Spinosad        | 5   | 81.9  | 1.8 | 79.5  | 3.2 | 78.4 | 1.3  | 5  | 95.1  | 1.1 | 86.4  | 3.2 | 91.6  | 2.7  | 5  | 75.5  | 4.2 | 80.6  | 4.0 | 80.5  | 4.4  | 50 | F     | F   | F     | F   | 93.7  | 0.8  |
| Spirodiclofen   | 1   | 93.8  | 8.6 | 91.0  | 4.6 | 84.7 | 2.7  | 5  | 97.4  | 1.2 | 89.9  | 2.4 | 88.9  | 6.5  | 1  | 88.7  | 4.4 | 90.9  | 3.0 | 84.8  | 4.8  | 5  | 104.6 | 4.2 | 101.1 | 4.6 | 99.8  | 1.5  |
| Spirotetramat   | 5   | 126.7 | 7.2 | 106.1 | 4.0 | 99.6 | 3.4  | 5  | 109.0 | 4.5 | 103.2 | 3.7 | 95.8  | 4.5  | 1  | 113.5 | 9.9 | 108.9 | 2.7 | 101.9 | 8.9  | 1  | 125.4 | 4.6 | 115.1 | 4.0 | 104.8 | 5.6  |
| Sulcotrione     | 100 | F     | F   | F     | F   | F    | F    | 5  | 103.7 | 3.1 | 99.6  | 5.0 | 96.0  | 6.5  | 5  | 104.9 | 3.3 | 115.4 | 4.9 | 107.1 | 12.6 | 50 | F     | F   | F     | F   | 41.1  | 12.2 |
| Sulfentrazone   | 50  | F     | F   | F     | F   | 19.5 | 8.3  | 5  | 103.7 | 3.1 | 99.6  | 5.0 | 96.0  | 6.5  | 20 | F     | F   | 115.0 | 7.5 | 106.9 | 2.3  | 5  | 113.0 | 8.6 | 114.7 | 5.5 | 114.1 | 4.3  |
| Sulfluramid     | 1   | 90.8  | 5.2 | 85.0  | 4.0 | 88.0 | 1.6  | 1  | 98.3  | 7.3 | 88.0  | 4.4 | 88.5  | 7.0  | 1  | 92.7  | 2.4 | 90.1  | 7.1 | 86.2  | 1.6  | 1  | 95.8  | 6.8 | 91.0  | 1.5 | 88.4  | 4.2  |
| Sulfotepp       | 1   | 116.5 | 5.9 | 111.1 | 6.3 | 97.9 | 1.4  | 1  | 120.8 | 1.4 | 109.0 | 1.7 | 100.0 | 4.2  | 1  | 119.4 | 3.9 | 115.1 | 3.0 | 100.9 | 2.6  | 1  | 136.2 | 2.2 | 130.8 | 3.7 | 117.0 | 2.0  |
| Sulfoxaflor     | 50  | F     | F   | F     | F   | 88.8 | 1.8  | 5  | 122.5 | 1.4 | 102.9 | 1.5 | 93.9  | 3.5  | 20 | F     | F   | 77.4  | 1.1 | 79.6  | 3.9  | 20 | F     | F   | 98.9  | 2.5 | 90.7  | 2.7  |
| Tau-fluvalinate | 20  | F     | F   | 75.0  | 7.7 | 81.4 | 13.0 | 20 | F     | F   | 63.4  | 7.7 | 90.6  | 10.9 | 50 | F     | F   | F     | F   | 89.6  | 7.5  | 50 | F     | F   | F     | F   | 82.5  | 13.5 |
| Tebuconazole    | 5   | 111.2 | 0.6 | 103.2 | 0.6 | 97.0 | 2.6  | 5  | 119.1 | 5.3 | 98.4  | 1.0 | 98.8  | 4.2  | 5  | 105.5 | 0.2 | 103.4 | 4.5 | 94.3  | 0.5  | 20 | F     | F   | 101.4 | 5.9 | 95.1  | 3.6  |
| Tebufenozide    | 5   | 107.8 | 5.3 | 97.4  | 4.9 | 90.6 | 2.3  | 20 | F     | F   | 102.0 | 3.6 | 104.6 | 4.4  | 5  | 109.7 | 1.1 | 111.8 | 1.0 | 104.1 | 1.4  | 20 | F     | F   | 105.3 | 1.8 | 101.4 | 1.5  |

|                       |    |           |          |           |          |          |     |    |           |          |           |     |           |      |    |           |     |           |          |          |     |    |           |     |           |      |           |          |
|-----------------------|----|-----------|----------|-----------|----------|----------|-----|----|-----------|----------|-----------|-----|-----------|------|----|-----------|-----|-----------|----------|----------|-----|----|-----------|-----|-----------|------|-----------|----------|
| Tebuthiuron           | 1  | 10<br>2.0 | 4.0      | 105.<br>8 | 1.<br>4  | 95.<br>1 | 1.5 | 1  | 113.<br>1 | 3.6      | 106.<br>7 | 5.2 | 100<br>.8 | 2.1  | 1  | 101.<br>5 | 5.7 | 104.<br>7 | 0.6      | 93.<br>5 | 1.5 | 1  | 95.5      | 2.8 | 96.4      | 4.1  | 94.5      | 0.5      |
| Teflubenzuron         | 5  | 71.<br>6  | 12.<br>2 | 83.2      | 9.<br>3  | 75.<br>6 | 5.5 | 50 | f         | F        | F         | F   | 88.<br>9  | 7.4  | 20 | F         | F   | 91.6      | 5.6      | 75.<br>2 | 5.2 | 10 | F         | F   | 47.7      | 53.1 | 84.5      | 17.<br>6 |
| Terbufos sulfone      | 5  | 96.<br>3  | 2.6      | 88.2      | 4.<br>8  | 83.<br>9 | 2.4 | 5  | 114.<br>3 | 2.4      | 105.<br>0 | 2.6 | 100<br>.4 | 3.9  | 5  | 92.6      | 7.1 | 84.7      | 0.5      | 78.<br>9 | 3.9 | 5  | 115.<br>3 | 4.5 | 108.<br>0 | 2.7  | 100.<br>2 | 2.1      |
| Terbufos-sulfoxide    | 1  | 10<br>7.5 | 4.4      | 95.6      | 5.<br>1  | 89.<br>1 | 2.2 | 1  | 132.<br>8 | 0.8      | 116.<br>2 | 0.7 | 105<br>.4 | 3.2  | 1  | 105.<br>4 | 8.2 | 96.2      | 2.0      | 88.<br>5 | 2.4 | 5  | 116.<br>4 | 2.8 | 109.<br>6 | 1.0  | 100.<br>8 | 1.3      |
| Terbufos              | 20 | F         | F        | 55.9      | 25<br>.3 | 65.<br>8 | 8.3 | 5  | 42.0      | 43.<br>0 | 60.1      | 9.6 | 81.<br>4  | 3.1  | 10 | F         | F   | 68.8      | 2.9      | 75.<br>4 | 3.6 | 20 | F         | F   | 97.1      | 12.3 | 100.<br>3 | 5.4      |
| Terbuthylazine        | 1  | 97.<br>4  | 3.7      | 92.6      | 4.<br>6  | 85.<br>4 | 2.8 | 1  | 113.<br>7 | 2.9      | 99.3      | 2.0 | 93.<br>4  | 1.0  | 1  | 105.<br>4 | 3.6 | 96.5      | 1.5      | 89.<br>9 | 1.2 | 1  | 100.<br>8 | 6.1 | 90.5      | 3.0  | 94.5      | 13.<br>9 |
| Tetraconazole         | 20 | F         | F        | 93.9      | 7.<br>0  | 92.<br>7 | 2.6 | 5  | 99.8      | 4.9      | 90.3      | 3.7 | 86.<br>7  | 7.2  | 5  | 101.<br>2 | 1.6 | 94.7      | 1.8      | 89.<br>3 | 3.9 | 20 | F         | F   | 90.6      | 5.0  | 91.7      | 3.4      |
| Thiabendazole         | 1  | 89.<br>7  | 5.2      | 84.9      | 2.<br>3  | 80.<br>4 | 1.7 | 1  | 112.<br>1 | 5.9      | 95.9      | 6.4 | 89.<br>8  | 1.8  | 5  | 88.1      | 1.0 | 80.3      | 1.3      | 75.<br>0 | 3.0 | 1  | 97.2      | 1.4 | 85.9      | 2.4  | 82.3      | 0.8      |
| Thiacloprid           | 1  | 95.<br>5  | 9.5      | 95.6      | 2.<br>5  | 88.<br>0 | 1.4 | 1  | 109.<br>5 | 2.2      | 93.3      | 4.0 | 87.<br>5  | 9.4  | 1  | 90.6      | 1.3 | 84.5      | 1.6      | 79.<br>8 | 2.6 | 1  | 103.<br>2 | 3.1 | 94.6      | 4.1  | 92.1      | 1.8      |
| Thiamethoxam          | 5  | 10<br>2.6 | 2.0      | 97.0      | 1.<br>0  | 86.<br>5 | 1.8 | 5  | 110.<br>2 | 2.6      | 103.<br>0 | 4.0 | 95.<br>1  | 5.2  | 5  | 81.7      | 3.1 | 82.4      | 3.3      | 75.<br>6 | 2.4 | 1  | 119.<br>9 | 0.2 | 112.<br>0 | 3.3  | 97.8      | 4.3      |
| Thidiazuron           | 10 | F         | F        | 82.0      | 1.<br>5  | 76.<br>9 | 2.1 | 10 | F         | F        | 77.0      | 2.5 | 79.<br>1  | 4.8  | 5  | 76.4      | 0.5 | 78.2      | 1.6      | 74.<br>9 | 5.1 | 20 | F         | F   | 88.6      | 4.8  | 89.2      | 1.9      |
| Thiencarbazone-methyl | 20 | F         | F        | 55.1      | 0.<br>6  | 70.<br>1 | 3.2 | 50 | F         | F        | F         | F   | 62.<br>1  | 14.2 | 5  | 60.9      | 4.7 | 73.1      | 13.<br>5 | 78.<br>3 | 2.4 | 50 | F         | F   | F         | F    | 91.6      | 7.9      |
| Thifensulfuron-methyl | NA | F         | F        | F         | F        | F        | F   | 50 | F         | F        | F         | F   | 70.<br>1  | 4.9  | 20 | F         | F   | 63.6      | 11.<br>5 | 71.<br>9 | 6.4 | 20 | F         | F   | 30.2      | 24.3 | 60.4      | 13.<br>2 |

|                    |    |       |      |       |      |       |      |    |       |      |       |      |       |       |        |       |      |       |     |       |     |    |       |     |       |      |       |      |      |
|--------------------|----|-------|------|-------|------|-------|------|----|-------|------|-------|------|-------|-------|--------|-------|------|-------|-----|-------|-----|----|-------|-----|-------|------|-------|------|------|
| Thiifluzamide      | 5  | 16.5  | 34.8 | 66.3  | 6.3  | 59.5  | 4.7  | 10 | F     | F    | 79.8  | 4.5  | 78.4  | 8.8   | 5      | 61.3  | 19.4 | 83.5  | 2.1 | 76.8  | 1.2 | 50 | F     | F   | F     | F    | 69.4  | 14.9 |      |
| Thiobencarb        | 5  | 83.0  | 10.1 | 83.6  | 6.8  | 73.0  | 1.2  | 1  | 98.8  | 3.9  | 98.8  | 1.1  | 92.9  | 5.1   | 5      | 106.4 | 8.3  | 115.2 | 5.4 | 102.6 | 2.7 | 5  | 114.1 | 1.6 | 117.2 | 8.1  | 107.1 | 7.6  |      |
| Thiocyclam         | 50 | F     | F    | F     | F    | 69.1  | 2.1  | 20 | F     | F    | 67.4  | 8.8  | 69.1  | 2.1   | 50     | F     | F    | F     | F   | 61.0  | 8.5 | 20 | F     | F   | 72.2  | 4.8  | 72.1  | 7.7  |      |
| Thiodicarb         | 1  | 110.1 | 2.3  | 105.8 | 5.5  | 94.0  | 1.8  | 5  | 109.0 | 3.2  | 102.5 | 3.0  | 96.2  | 2.9   | 5      | 103.7 | 2.6  | 101.4 | 3.9 | 91.2  | 3.5 | 5  | 119.0 | 0.8 | 123.5 | 0.4  | 112.2 | 2.6  |      |
| Thiophanate-methyl | 5  | 51.7  | 9.9  | 63.6  | 3.4  | 63.7  | 3.9  | 5  | 25.6  | 2.5  | 38.8  | 5.8  | 48.5  | 10.2  | 5      | 56.4  | 2.7  | 74.8  | 1.2 | 72.6  | 0.4 | 5  | 106.4 | 5.3 | 107.2 | 3.1  | 102.6 | 0.8  |      |
| Thiophanate        | 5  | 22.0  | 21.2 | 39.7  | 5.7  | 54.3  | 2.4  | 5  | 5.0   | 14.3 | 17.8  | 14.4 | 37.4  | 9.1   | 5      | 43.5  | 7.7  | 68.0  | 2.3 | 71.0  | 2.2 | 5  | 98.7  | 1.4 | 106.1 | 4.6  | 102.7 | 3.2  |      |
| Tolclofos-methyl   | 20 | F     | F    | 53.8  | 77.9 | 80.2  | 14.4 | 5  | 60.6  | 8.4  | 83.6  | 4.0  | 89.8  | 3.4   | 20     | F     | F    | 77.0  | 5.9 | 83.6  | 5.4 | 50 | F     | F   | F     | F    | 79.3  | 15.6 |      |
| Tolfenpyrad        | 5  | 73.4  | 3.9  | 72.2  | 6.7  | 66.9  | 2.7  | 5  | 88.8  | 6.4  | 87.0  | 4.9  | 92.1  | 0.8   | 5      | 88.9  | 1.9  | 86.0  | 2.6 | 84.4  | 1.3 | 5  | 100.2 | 2.7 | 94.4  | 3.9  | 88.0  | 1.9  |      |
| Tolyfluanid        | 5  | 117.6 | 8.6  | 120.8 | 4.5  | 104.6 | 1.3  | 5  | 127.7 | 1.5  | 131.2 | 8.2  | 113.7 | 3.7   | 5      | 126.7 | 3.4  | 126.3 | 4.0 | 112.2 | 5.8 | 10 | F     | F   | 88.4  | 18.9 | 103.8 | 2.5  |      |
| Topramezone        | 50 | F     | F    | F     | F    | 4.1   | 53.7 | 50 | F     | F    | F     | F    | 3.7   | 120.4 | N<br>A | F     | F    | F     | F   | F     | F   | F  | 50    | F   | F     | F    | F     | 23.1 | 16.4 |
| Tralkoxydim        | 1  | 80.5  | 3.8  | 83.1  | 6.7  | 78.3  | 0.8  | 5  | 96.1  | 1.7  | 90.5  | 2.7  | 85.9  | 8.7   | 5      | 94.0  | 3.0  | 90.4  | 4.8 | 88.1  | 0.6 | 5  | 97.5  | 1.4 | 93.2  | 3.7  | 89.6  | 1.8  |      |
| Triadimefon        | 1  | 97.5  | 8.3  | 101.4 | 3.0  | 93.7  | 1.1  | 5  | 109.3 | 3.9  | 110.2 | 5.6  | 106.0 | 1.8   | 5      | 114.5 | 7.0  | 116.6 | 4.0 | 105.4 | 1.7 | 5  | 99.0  | 3.8 | 99.3  | 8.0  | 98.9  | 3.1  |      |
| Triadimenol        | 50 | F     | F    | F     | F    | 96.2  | 0.5  | 20 | F     | F    | 100.1 | 3.4  | 97.1  | 4.2   | 20     | F     | F    | 103.1 | 4.5 | 96.6  | 2.5 | 5  | 106.4 | 1.4 | 108.9 | 1.6  | 108.8 | 3.2  |      |

|                       |    |       |     |       |      |      |      |    |       |     |       |      |       |      |    |       |      |       |      |       |      |    |       |      |       |      |       |      |
|-----------------------|----|-------|-----|-------|------|------|------|----|-------|-----|-------|------|-------|------|----|-------|------|-------|------|-------|------|----|-------|------|-------|------|-------|------|
| Triallate             | 50 | F     | F   | F     | F    | 75.1 | 6.4  | 50 | F     | F   | F     | F    | 91.4  | 5.2  | 50 | F     | F    | F     | F    | 88.3  | 6.2  | 50 | F     | F    | F     | F    | 100.8 | 11.1 |
| Triasulfuron          | 20 | F     | F   | 86.3  | 5.0  | 88.3 | 2.8  | 50 | F     | F   | F     | F    | 89.9  | 4.3  | 20 | F     | F    | 105.8 | 5.5  | 100.7 | 3.9  | 50 | F     | F    | F     | F    | 99.4  | 2.1  |
| Triazophos            | 1  | 96.7  | 8.8 | 100.0 | 4.3  | 91.4 | 0.9  | 1  | 104.3 | 1.8 | 107.7 | 9.0  | 103.2 | 3.6  | 1  | 120.7 | 11.4 | 109.2 | 1.8  | 103.1 | 2.2  | 1  | 105.1 | 2.1  | 105.3 | 6.3  | 102.0 | 2.6  |
| Tribenuron-methyl     | 20 | F     | F   | 103.1 | 6.0  | 95.7 | 1.6  | 50 | F     | F   | F     | F    | 97.4  | 4.4  | 20 | F     | F    | 90.6  | 5.2  | 95.1  | 5.0  | 50 | F     | F    | F     | F    | 94.6  | 5.9  |
| Trichlorfon           | 20 | F     | F   | 95.4  | 2.7  | 91.0 | 2.7  | 5  | 105.9 | 4.5 | 94.4  | 4.2  | 89.2  | 6.4  | 5  | 92.4  | 7.3  | 92.3  | 5.6  | 87.3  | 0.7  | 10 | F     | F    | 97.4  | 0.6  | 96.0  | 1.8  |
| Triclopyricarb        | 5  | 104.3 | 5.3 | 100.0 | 4.6  | 85.7 | 1.1  | 5  | 114.5 | 7.4 | 100.3 | 1.7  | 92.2  | 5.8  | 5  | 102.6 | 2.1  | 101.4 | 2.1  | 88.8  | 2.7  | 50 | F     | F    | F     | F    | 90.7  | 1.0  |
| Triclopyr             | 10 | F     | F   | 6.8   | 17.4 | 15.4 | 19.4 | 20 | F     | F   | 14.8  | 21.2 | 20.6  | 13.0 | 10 | F     | F    | 7.0   | 45.0 | 20.6  | 25.3 | 20 | F     | F    | 5.7   | 44.9 | 20.1  | 25.9 |
| Triflumizole          | 1  | 107.1 | 4.9 | 94.6  | 1.3  | 87.8 | 1.8  | 1  | 129.9 | 2.7 | 107.0 | 4.3  | 95.8  | 5.7  | 1  | 110.5 | 3.3  | 90.9  | 3.1  | 84.0  | 4.0  | 1  | 123.3 | 1.6  | 104.9 | 0.7  | 94.5  | 1.3  |
| Trifloxystrobin       | 1  | 96.1  | 1.6 | 85.7  | 4.4  | 87.4 | F    | 1  | 104.8 | 3.2 | 98.4  | 5.0  | 92.0  | F    | 1  | 99.1  | 0.1  | 96.9  | 1.4  | 90.9  | 1.5  | 5  | 107.3 | 2.1  | 96.0  | 3.9  | 90.7  | 3.6  |
| Triflumizole          | 1  | 77.1  | 1.5 | 71.2  | 3.9  | 75.6 | 4.5  | 1  | 48.0  | 8.0 | 49.6  | 4.4  | 75.0  | 8.2  | 1  | 79.9  | 2.5  | 85.7  | 0.9  | 83.6  | 2.8  | 5  | 102.4 | 2.2  | 94.9  | 5.0  | 90.7  | 2.4  |
| Triflumuron           | 5  | 97.4  | 5.6 | 88.2  | 8.3  | 78.6 | 0.5  | 20 | F     | F   | 97.3  | 3.7  | 87.2  | 1.9  | 5  | 111.0 | 1.2  | 102.8 | 0.4  | 92.1  | 3.2  | 20 | F     | F    | 77.9  | 10.7 | 81.0  | 15.3 |
| Triflusulfuron-methyl | 50 | F     | F   | F     | F    | 86.4 | 17.5 | 50 | F     | F   | F     | F    | 65.5  | 17.1 | 50 | F     | F    | F     | F    | 76.1  | 25.2 | 50 | F     | F    | F     | F    | 60.2  | 19.4 |
| Triforine             | 10 | F     | F   | 106.3 | 4.9  | 96.4 | 2.2  | 10 | F     | F   | 98.4  | 4.0  | 91.8  | 5.4  | 5  | 85.6  | 7.2  | 99.4  | 1.7  | 85.4  | 1.5  | 5  | 109.8 | 15.1 | 114.6 | 3.8  | 113.8 | 1.3  |

|                  |   |           |          |           |         |          |          |   |           |          |           |          |           |      |   |           |     |           |          |           |          |    |           |     |           |     |      |     |
|------------------|---|-----------|----------|-----------|---------|----------|----------|---|-----------|----------|-----------|----------|-----------|------|---|-----------|-----|-----------|----------|-----------|----------|----|-----------|-----|-----------|-----|------|-----|
| Trinexapac-ethyl | 1 | 83.<br>3  | 3.1      | 71.5      | 5.<br>9 | 55.<br>0 | 7.2      | 5 | 83.2      | 21.<br>6 | 69.6      | 27.<br>4 | 75.<br>9  | 19.4 | 5 | 71.2      | 4.8 | 75.5      | 23.<br>3 | 68.<br>3  | 18.<br>2 | 20 | F         | F   | 42.6      | 7.5 | 58.5 | 5.6 |
| Uniconazole      | 5 | 59.<br>3  | 85.<br>5 | 86.6      | 3.<br>3 | 56.<br>2 | 86.<br>4 | 5 | 32.7      | 56.<br>9 | 86.0      | 3.3      | 86.<br>1  | 3.6  | 1 | 95.6      | 1.0 | 92.6      | 6.0      | 89.<br>7  | 2.2      | 20 | F         | F   | 89.4      | 1.5 | 88.2 | 3.3 |
| Vamidothion      | 1 | 10<br>9.9 | 7.9      | 105.<br>8 | 2.<br>4 | 96.<br>6 | 1.6      | 1 | 117.<br>4 | 3.7      | 100.<br>1 | 8.9      | 92.<br>5  | 6.6  | 5 | 98.1      | 0.5 | 96.6      | 3.8      | 85.<br>2  | 3.3      | 1  | 110.<br>1 | 4.5 | 108.<br>7 | 6.8 | 95.9 | 3.5 |
| Zoxamide         | 1 | 94.<br>7  | 7.7      | 102.<br>1 | 4.<br>3 | 92.<br>3 | 4.4      | 5 | 105.<br>6 | 1.7      | 107.<br>5 | 7.9      | 101<br>.9 | 2.1  | 1 | 107.<br>4 | 4.5 | 108.<br>0 | 2.9      | 103<br>.0 | 0.7      | 5  | 103.<br>6 | 8.9 | 99.8      | 5.6 | 98.3 | 2.6 |
| Metamitron       | 5 | 10<br>2.0 | 5.7      | 94.7      | 1.<br>5 | 88.<br>7 | 2.0      | 1 | 108.<br>6 | 1.7      | 101.<br>6 | 7.8      | 97.<br>5  | 2.6  | 1 | 100.<br>6 | 4.2 | 90.6      | 2.3      | 80.<br>9  | 0.9      | 1  | 112.<br>7 | 1.8 | 101.<br>5 | 4.1 | 95.8 | 1.1 |

SDL:Screening detection limits, F: Recovery or RSD is not acceptable, NA: Not detected.

**Table S6** The screening detection limit and recoveries for 403 pesticides at 5, 20, 50 µg/kg in carrot, apple, watermelon, and pear.

| Pesticides                     | Carrot                 |         |                        |          |                        |          |                        | Apple                  |         |                        |          |                        |          |                    | Watermelon                 |         |                        |          |                        |          |                    | Pear                       |         |                        |          |                    |          |                        |
|--------------------------------|------------------------|---------|------------------------|----------|------------------------|----------|------------------------|------------------------|---------|------------------------|----------|------------------------|----------|--------------------|----------------------------|---------|------------------------|----------|------------------------|----------|--------------------|----------------------------|---------|------------------------|----------|--------------------|----------|------------------------|
|                                | SD<br>L<br>(µg/<br>kg) | 5 µg/kg |                        | 20 µg/kg |                        | 50 µg/kg |                        | SD<br>L<br>(µg/<br>kg) | 5 µg/kg |                        | 20 µg/kg |                        | 50 µg/kg |                    | SD<br>L<br>(µ<br>g/k<br>g) | 5 µg/kg |                        | 20 µg/kg |                        | 50 µg/kg |                    | SD<br>L<br>(µg<br>/kg<br>) | 5 µg/kg |                        | 20 µg/kg |                    | 50 µg/kg |                        |
|                                |                        | AVE     | RS<br>D,<br>%<br>(n=3) | AV<br>E  | RS<br>D,<br>%<br>(n=3) | AV<br>E  | RS<br>D,<br>%<br>(n=3) |                        | AVE     | RS<br>D,<br>%<br>(n=3) | AVE      | RS<br>D,<br>%<br>(n=3) | AVE      | RSD,<br>%<br>(n=3) |                            | AVE     | RS<br>D,<br>%<br>(n=3) | AVE      | RS<br>D,<br>%<br>(n=3) | AVE      | RSD,<br>%<br>(n=3) |                            | AVE     | RS<br>D,<br>%<br>(n=3) | AVE      | RSD,<br>%<br>(n=3) | AVE      | RS<br>D,<br>%<br>(n=3) |
| 1-naphthylacetic acid          | 5                      | 119.4   | 5.0                    | 96.2     | 14.1                   | 62.7     | 13.4                   | 5                      | 57.5    | 20.8                   | 13.8     | 34.7                   | 12.4     | 36.5               | 5                          | 67.4    | 5.0                    | 33.6     | 4.6                    | 34.0     | 14.9               | 50                         | F       | F                      | F        | F                  | 76.9     | 13.1                   |
| 2,4-Dichlorophenoxyacetic acid | 20                     | F       | F                      | 13.3     | 17.3                   | 19.0     | 5.2                    | 20                     | F       | F                      | 4.0      | 69.1                   | 11.0     | 5.3                | 20                         | F       | F                      | 7.8      | 20.8                   | 16.0     | 25.4               | 50                         | F       | F                      | F        | F                  | 25.2     | 5.0                    |
| Acephate                       | 5                      | 98.3    | 2.9                    | 103.1    | 1.5                    | 90.7     | 5.6                    | 5                      | 109.7   | 3.5                    | 111.3    | 1.8                    | 106.0    | 4.0                | 5                          | 111.8   | 3.7                    | 109.8    | 2.4                    | 102.4    | 2.2                | 10                         | F       | F                      | 103.4    | 9.8                | 95.1     | 1.3                    |
| Acetamiprid                    | 5                      | 125.8   | 3.9                    | 122.2    | 1.7                    | 107.0    | 0.2                    | 1                      | 122.0   | 13.6                   | 70.9     | 10.6                   | 55.1     | 3.5                | 1                          | 125.0   | 3.8                    | 114.2    | 2.3                    | 107.2    | 4.1                | 5                          | 103.4   | 1.3                    | 107.1    | 4.8                | 94.6     | 4.6                    |
| Acetochlor                     | 5                      | 107.0   | 4.8                    | 101.3    | 5.1                    | 94.2     | 2.3                    | 5                      | 117.5   | 2.5                    | 113.2    | 1.9                    | 102.9    | 2.3                | 5                          | 115.8   | 1.4                    | 109.8    | 2.5                    | 104.0    | 8.1                | 5                          | 109.2   | 6.7                    | 106.0    | 1.3                | 95.5     | 2.4                    |
| Acifluorfen                    | 5                      | 4.7     | 10.3                   | 13.2     | 5.2                    | 26.8     | 10.1                   | 5                      | 2.8     | 37.4                   | 8.4      | 9.5                    | 25.2     | 3.4                | 5                          | 3.3     | 48.3                   | 10.3     | 10.4                   | 32.8     | 27.0               | 20                         | F       | F                      | 14.6     | 0.5                | 29.8     | 4.9                    |
| Alachlor                       | 5                      | 107.0   | 4.8                    | 101.3    | 5.1                    | 94.2     | 2.3                    | 5                      | 117.5   | 2.5                    | 113.2    | 1.9                    | 102.9    | 2.3                | 5                          | 115.8   | 1.4                    | 109.8    | 2.5                    | 104.0    | 8.1                | 5                          | 109.2   | 6.7                    | 106.0    | 4.7                | 95.5     | 2.4                    |
| Albendazole                    | 1                      | 88.1    | 3.2                    | 92.3     | 2.5                    | 89.0     | 2.6                    | 1                      | 106.5   | 8.5                    | 102.4    | 0.1                    | 93.3     | 0.8                | 1                          | 104.1   | 3.9                    | 97.3     | 3.0                    | 93.2     | 1.8                | 5                          | 79.7    | 1.7                    | 79.5     | 0.5                | 80.1     | 3.2                    |

|                     |    |       |      |       |      |       |      |    |       |      |       |      |       |      |    |       |      |       |     |       |      |    |       |      |       |      |       |      |
|---------------------|----|-------|------|-------|------|-------|------|----|-------|------|-------|------|-------|------|----|-------|------|-------|-----|-------|------|----|-------|------|-------|------|-------|------|
| Aldicarb sulfoxide  | 10 | F     | F    | 106.3 | 3.2  | 92.4  | 2.5  | 1  | 107.0 | 2.8  | 107.9 | 1.8  | 100.4 | 3.1  | 20 | F     | F    | 102.2 | 1.8 | 98.2  | 1.2  | 10 | F     | F    | 106.7 | 7.0  | 95.2  | 2.4  |
| Aldicarb            | 5  | 125.8 | 9.7  | 135.0 | 4.3  | 112.5 | 2.0  | 20 | F     | F    | 135.8 | 6.0  | 113.6 | 5.3  | 5  | 143.9 | 5.3  | 126.9 | 9.6 | 101.6 | 10.4 | 5  | 102.2 | 6.2  | 105.0 | 1.3  | 87.4  | 12.5 |
| Aldoxycarb          | 1  | 127.9 | 8.6  | 119.5 | 2.7  | 97.7  | 3.3  | 1  | 145.6 | 3.0  | 130.3 | 3.2  | 108.6 | 1.7  | 1  | 143.7 | 1.5  | 125.1 | 2.7 | 105.8 | 3.7  | 1  | 114.6 | 1.3  | 107.0 | 11.9 | 89.4  | 2.2  |
| Ametoctradin        | 5  | 96.0  | 1.0  | 92.7  | 3.2  | 88.7  | 5.1  | 1  | 111.5 | 4.4  | 100.4 | 3.7  | 99.0  | 1.8  | 1  | 102.5 | 2.0  | 95.6  | 3.3 | 94.4  | 3.1  | 1  | 99.5  | 1.0  | 90.8  | 4.8  | 93.9  | 6.2  |
| Ametryn             | 1  | 108.1 | 1.7  | 101.4 | 1.7  | 95.6  | 3.2  | 1  | 108.7 | 1.4  | 101.9 | 0.4  | 104.8 | 3.3  | 1  | 114.3 | 3.8  | 106.5 | 3.5 | 103.3 | 3.2  | 1  | 105.5 | 2.1  | 100.9 | 2.3  | 97.7  | 1.2  |
| Amidosulfuron       | 5  | 58.9  | 6.5  | 65.4  | 5.0  | 74.3  | 3.3  | 5  | 32.3  | 3.2  | 44.6  | 4.1  | 68.5  | 2.1  | 5  | 52.9  | 4.4  | 58.5  | 3.5 | 81.9  | 7.6  | 20 | F     | F    | 74.7  | 4.0  | 84.7  | 2.9  |
| Aminocyclopyrachlor | 20 | F     | F    | F     | F    | F     | F    | 20 | F     | F    | F     | F    | F     | F    | 20 | F     | F    | F     | F   | F     | F    | 50 | F     | F    | F     | F    | 1.3   | 31.9 |
| Aminopyralid        | NA | F     | F    | F     | F    | F     | F    | NA | F     | F    | F     | F    | F     | F    | NA | F     | F    | F     | F   | F     | F    | NA | F     | F    | F     | F    | F     | F    |
| Amisulbrom          | 10 | F     | F    | 96.9  | 10.3 | 112.2 | 4.6  | 5  | 76.4  | 27.9 | 130.2 | 11.0 | 118.9 | 4.6  | 5  | 126.8 | 17.8 | 125.3 | 8.5 | 119.5 | 19.7 | 5  | 89.9  | 14.9 | 120.2 | 5.2  | 103.3 | 11.3 |
| Amitraz             | 5  | 53.5  | 9.0  | 6.7   | 9.0  | 1.9   | 9.3  | 1  | 139.2 | 24.3 | 118.8 | 27.5 | 123.7 | 12.9 | 5  | F     | F    | F     | F   | F     | F    | 1  | 95.2  | 32.0 | 153.9 | 10.3 | 107.6 | 4.5  |
| Amitrole            | 5  | 7.2   | 29.2 | 2.0   | 28.3 | 3.1   | 32.1 | 5  | 30.5  | 97.3 | 23.4  | 8.4  | 11.5  | 0.9  | 5  | 48.8  | 17.5 | 13.6  | 4.0 | 7.9   | 10.1 | 20 | F     | F    | 85.3  | 6.8  | 41.1  | 9.6  |
| Anilazine           | 5  | 87.6  | 8.7  | 98.3  | 7.9  | 85.4  | 6.2  | 5  | 144.0 | 3.8  | 196.0 | 3.7  | 188.6 | 3.3  | 5  | 222.2 | 3.5  | 255.0 | 5.4 | 222.1 | 2.2  | 5  | 162.3 | 7.7  | 179.1 | 5.2  | 161.0 | 6.8  |
| Anilofos            | 1  | 114.  | 9.5  | 109   | 2.8  | 97.4  | 2.4  | 1  | 119   | 1.6  | 111.  | 2.7  | 101.  | 3.9  | 1  | 114   | 0.6  | 106.  | 3.6 | 98.4  | 1.0  | 1  | 104   | 5.7  | 106   | 5.2  | 97.8  | 1.9  |





|                   |    |       |      |       |     |       |      |    |       |     |       |      |       |      |   |       |      |       |      |       |      |    |       |      |       |      |       |      |
|-------------------|----|-------|------|-------|-----|-------|------|----|-------|-----|-------|------|-------|------|---|-------|------|-------|------|-------|------|----|-------|------|-------|------|-------|------|
| Benzoximate       | 5  | 116.9 | 2.8  | 121.6 | 5.6 | 105.2 | 3.1  | 5  | 126.8 | 2.3 | 121.3 | 5.8  | 111.0 | 2.8  | 5 | 125.1 | 4.9  | 115.6 | 4.6  | 113.1 | 6.1  | 5  | 120.7 | 0.7  | 124.1 | 3.1  | 106.6 | 3.4  |
| Bifenazate        | 20 | F     | F    | F     | F   | F     | F    | 20 | F     | F   | F     | F    | 31.1  | 31.8 | 5 | 62.5  | 6.4  | 75.4  | 2.0  | 81.6  | 14.6 | 50 | F     | F    | F     | F    | 29.6  | 10.6 |
| Bifenox           | 5  | 106.5 | 15.4 | 86.7  | 8.1 | 63.7  | 5.5  | 5  | 178.4 | 6.3 | 146.2 | 5.0  | 117.2 | 2.3  | 5 | 153.1 | 9.8  | 141.4 | 3.3  | 107.7 | 4.8  | 50 | F     | F    | F     | F    | 104.1 | 3.1  |
| Bifenthrin        | 20 | F     | F    | 76.7  | 3.6 | 82.3  | 10.9 | 50 | F     | F   | F     | F    | 110.4 | 5.1  | 1 | 72.9  | 46.5 | 91.8  | 7.8  | 103.2 | 1.6  | 5  | 61.8  | 16.4 | 78.2  | 4.9  | 78.5  | 10.1 |
| Bispyribac-sodium | 50 | F     | F    | F     | F   | 33.7  | 1.4  | 20 | F     | F   | 2.8   | 31.6 | 14.2  | 12.0 | 5 | 4.8   | 8.5  | 14.3  | 13.9 | 36.8  | 26.1 | 5  | 19.2  | 12.0 | 22.8  | 9.5  | 42.5  | 6.1  |
| Bitertanol        | 10 | F     | F    | 106.3 | 2.4 | 96.1  | 0.5  | 50 | F     | F   | F     | F    | 108.2 | 3.2  | 5 | 119.4 | 3.3  | 107.3 | 1.9  | 100.0 | 4.4  | 10 | 112.8 | 3.3  | 106.5 | 11.2 | 98.5  | 1.1  |
| Boscalid          | 5  | 107.5 | 3.8  | 110.5 | 2.7 | 102.6 | 2.5  | 5  | 112.4 | 6.7 | 111.4 | 4.4  | 107.1 | 2.6  | 5 | 122.9 | 2.4  | 119.2 | 2.7  | 112.3 | 3.8  | 5  | 110.6 | 2.6  | 110.1 | 2.6  | 103.1 | 2.2  |
| Bromoxyni         | 1  | 35.0  | 7.3  | 45.3  | 1.1 | 58.5  | 5.4  | 1  | 24.7  | 6.5 | 37.0  | 6.4  | 59.6  | 1.6  | 1 | 32.8  | 3.9  | 39.9  | 5.1  | 65.8  | 13.5 | 1  | 42.0  | 1.6  | 46.7  | 0.9  | 60.9  | 3.5  |
| Bupirimate        | 1  | 108.9 | 2.1  | 103.2 | 3.4 | 96.0  | 5.8  | 1  | 121.5 | 2.7 | 112.0 | 2.2  | 111.3 | 3.9  | 1 | 116.9 | 2.5  | 108.7 | 3.5  | 104.1 | 3.0  | 1  | 114.6 | 2.5  | 105.1 | 1.9  | 101.0 | 2.3  |
| Buprofezin        | 1  | 105.7 | 3.0  | 102.9 | 6.5 | 98.5  | 5.0  | 1  | 119.3 | 2.9 | 105.7 | 4.9  | 103.3 | 4.1  | 1 | 111.6 | 2.1  | 103.7 | 0.8  | 98.7  | 1.2  | 1  | 102.9 | 5.7  | 93.9  | 3.0  | 94.8  | 4.2  |
| Butachlor         | 5  | 94.1  | 1.3  | 76.9  | 3.5 | 98.3  | 3.4  | 1  | 80.2  | 4.7 | 103.8 | 3.1  | 101.5 | 3.3  | 5 | 101.6 | 11.9 | 107.3 | 12.8 | 97.1  | 1.6  | 5  | 105.3 | 15.1 | 91.1  | 1.4  | 102.3 | 16.9 |
| Butralin          | 1  | 102.7 | 2.6  | 96.0  | 6.3 | 91.5  | 3.2  | 5  | 83.8  | 1.3 | 85.8  | 6.7  | 89.7  | 1.4  | 1 | 93.0  | 6.6  | 93.3  | 0.6  | 96.2  | 5.5  | 1  | 87.3  | 7.6  | 81.7  | 3.2  | 85.4  | 5.4  |
| Cadusafos         | 1  | 110.3 | 1.7  | 113.6 | 0.8 | 104.6 | 3.6  | 1  | 118.2 | 2.4 | 116.9 | 0.9  | 109.7 | 1.7  | 1 | 114.5 | 1.6  | 113.1 | 2.6  | 105.5 | 3.3  | 1  | 116.0 | 1.9  | 117.1 | 2.3  | 106.2 | 0.7  |

|                     |    |           |          |           |          |           |          |         |           |          |           |          |           |     |        |           |          |           |          |           |      |        |           |     |           |      |           |          |
|---------------------|----|-----------|----------|-----------|----------|-----------|----------|---------|-----------|----------|-----------|----------|-----------|-----|--------|-----------|----------|-----------|----------|-----------|------|--------|-----------|-----|-----------|------|-----------|----------|
| Captan              | NA | F         | F        | F         | F        | F         | F        | N<br>A  | F         | F        | F         | F        | F         | F   | N<br>A | F         | F        | F         | F        | F         | F    | N<br>A | F         | F   | F         | F    | F         | F        |
| Carbaryl            | 1  | 119.<br>6 | 6.3      | 106<br>.3 | 4.7      | 94.3      | 1.4      | 5       | 127<br>.6 | 3.6      | 119.<br>7 | 1.6      | 104.<br>0 | 1.0 | 5      | 114<br>.8 | 2.1      | 103.<br>1 | 7.8      | 99.7      | 2.0  | 1      | 109<br>.6 | 3.5 | 106<br>.0 | 6.3  | 93.7      | 1.5      |
| Carbendazim         | 1  | 120.<br>3 | 1.7      | 107<br>.0 | 1.7      | 90.7      | F        | 1       | 143<br>.6 | 4.9      | 96.6      | 5.7      | 118.<br>0 | 1.5 | 1      | 111<br>.0 | 1.2      | 103.<br>2 | 1.2      | 95.3      | 2.7  | 5      | 89.<br>3  | 3.2 | 87.<br>2  | 3.7  | 77.5      | 0.8      |
| Carbofuran          | 5  | 107.<br>9 | 13.<br>3 | 111<br>.9 | 0.2      | 98.8      | 1.9      | 5       | 121<br>.0 | 14.<br>2 | 128.<br>0 | 1.4      | 106.<br>8 | 2.0 | 5      | 115<br>.7 | 2.2      | 99.9      | 14.<br>5 | 99.7      | 4.3  | 5      | 110<br>.8 | 2.6 | 102<br>.6 | 2.4  | 87.7      | 6.8      |
| Carbofuran          | 1  | 154.<br>5 | 3.8      | 142<br>.2 | 2.4      | 124.<br>2 | 1.5      | 1       | 179<br>.2 | 3.9      | 156.<br>7 | 4.8      | 130.<br>2 | 3.1 | 1      | 166<br>.4 | 1.9      | 149.<br>2 | 2.7      | 123.<br>5 | 2.2  | 1      | 147<br>.1 | 3.8 | 138<br>.7 | 0.6  | 117.<br>2 | 0.8      |
| Carbosulfan         | 5  | 27.2      | 51.<br>1 | 24.<br>2  | 29.<br>4 | 12.6      | 12.<br>8 | 1       | 35.<br>2  | 30.<br>1 | 20.4      | 52.<br>2 | 13.2      | 5.6 | 1      | 53.<br>2  | 23.<br>8 | 31.2      | 49.<br>1 | 24.5      | 49.6 | 10     | F         | F   | 12.<br>7  | 0.6  | 8.4       | 36.<br>6 |
| Carboxin            | 1  | 93.5      | 4.5      | 93.<br>7  | 4.0      | 92.5      | 3.5      | 1       | 105<br>.4 | 4.6      | 93.7      | 2.7      | 85.7      | 2.2 | 1      | 91.<br>7  | 14.<br>8 | 83.9      | 7.3      | 84.7      | 2.1  | 5      | 79.<br>1  | 6.4 | 71.<br>3  | 24.2 | 68.6      | 5.3      |
| Carfentrazone-ethyl | 1  | 131.<br>5 | 2.0      | 130<br>.2 | 1.0      | 115.<br>3 | 1.1      | 1       | 128<br>.1 | 2.1      | 126.<br>9 | 1.9      | 110.<br>3 | 3.0 | 1      | 134<br>.6 | 3.2      | 123.<br>5 | 2.7      | 110.<br>9 | 0.7  | 5      | 125<br>.2 | 3.7 | 127<br>.8 | 5.4  | 112.<br>3 | 0.8      |
| Cartap              | 20 | F         | F        | 92.<br>7  | 2.3      | 92.5      | 4.4      | 10<br>0 | F         | F        | F         | F        | F         | F   | 1      | 91.<br>4  | 19.<br>0 | 82.4      | 8.8      | 86.7      | 2.1  | 10     | F         | F   | 69.<br>8  | 3.0  | 68.4      | 5.4      |
| Chlorantraniliprole | 50 | F         | F        | F         | F        | 102.<br>2 | 6.2      | 50      | F         | F        | F         | F        | 106.<br>3 | 1.2 | 5      | 124<br>.5 | 5.2      | 117.<br>0 | 3.0      | 108.<br>2 | 3.3  | 5      | 113<br>.2 | 5.6 | 109<br>.3 | 6.1  | 98.3      | 2.0      |
| Chlorbenzuron       | 5  | 143.<br>4 | 5.5      | 129<br>.5 | 4.8      | 106.<br>4 | 1.4      | 1       | F         | F        | 136.<br>8 | 10.<br>6 | 114.<br>3 | F   | 1      | 101<br>.9 | 2.6      | 137.<br>2 | 1.8      | 111.<br>2 | 3.3  | 1      | 150<br>.3 | 2.6 | 124<br>.2 | 3.2  | 98.1      | 6.2      |
| Chlordimeform       | 1  | 82.3      | 4.4      | 87.<br>7  | 3.2      | 86.2      | 5.8      | 5       | 68.<br>8  | 1.2      | 82.1      | 3.7      | 86.5      | 1.8 | 1      | 76.<br>8  | 2.9      | 86.7      | 1.9      | 91.3      | 1.6  | 10     | F         | F   | 43.<br>1  | 3.2  | 62.8      | 1.8      |
| Chlorfenapyr        | NA | F         | F        | F         | F        | F         | F        | N<br>A  | F         | F        | F         | F        | F         | F   | N<br>A | F         | F        | F         | F        | F         | F    | N<br>A | F         | F   | F         | F    | F         | F        |

|                      |    |       |      |       |     |       |      |    |       |     |       |      |       |     |    |       |      |       |      |       |     |    |       |      |       |      |       |     |
|----------------------|----|-------|------|-------|-----|-------|------|----|-------|-----|-------|------|-------|-----|----|-------|------|-------|------|-------|-----|----|-------|------|-------|------|-------|-----|
| Chlorfluazuron       | 5  | 86.8  | 11.1 | 96.2  | 3.7 | 89.1  | 5.8  | 20 | F     | F   | 105.0 | 2.9  | 95.5  | 4.4 | 5  | 112.6 | 1.8  | 103.5 | 2.3  | 99.8  | 1.8 | 10 | F     | F    | 90.4  | 3.5  | 89.5  | 4.2 |
| Chlorimuron-ethyl    | 5  | 70.8  | 6.9  | 83.5  | 6.9 | 81.9  | 6.9  | 20 | F     | F   | 50.2  | 6.3  | 67.2  | 0.7 | 5  | 66.2  | 4.0  | 70.8  | 4.2  | 83.7  | 3.4 | 5  | 69.7  | 12.3 | 75.8  | 4.5  | 79.8  | 1.8 |
| Chlorotoluron        | 5  | 121.6 | 3.2  | 112.2 | 2.1 | 99.0  | 1.5  | 5  | 131.2 | 3.6 | 120.5 | 1.0  | 103.0 | 1.9 | 5  | 127.5 | 1.8  | 116.7 | 2.3  | 102.9 | 0.9 | 5  | 109.3 | 1.5  | 109.4 | 2.7  | 94.7  | 3.1 |
| Chlorpyrifos oxon    | NA | F     | F    | F     | F   | F     | F    | NA | F     | F   | F     | F    | F     | F   | NA | F     | F    | F     | F    | F     | F   | NA | F     | F    | F     | F    | F     | F   |
| Chlorpyrifos-methyl  | 50 | F     | F    | F     | F   | 53.3  | 16.5 | 5  | 56.2  | 8.3 | 81.1  | 15.2 | 73.0  | 5.0 | 5  | 66.0  | 6.4  | 71.6  | 17.3 | 85.9  | 9.5 | 20 | F     | F    | 83.2  | 16.1 | 78.6  | 6.8 |
| Chlorpyrifos         | 5  | 96.1  | 18.5 | 101.0 | 3.5 | 91.7  | 6.5  | 5  | 95.7  | 5.0 | 98.5  | 3.6  | 102.5 | 4.6 | 5  | 95.0  | 9.0  | 106.9 | 7.2  | 102.2 | 2.8 | 5  | 101.6 | 1.8  | 104.9 | 3.1  | 95.5  | 5.7 |
| Chlorsulfuron        | 20 | F     | F    | 66.3  | 2.6 | 71.2  | 2.6  | 20 | F     | F   | 33.2  | 9.1  | 54.5  | 2.7 | 20 | F     | F    | 46.6  | 0.2  | 64.2  | 6.3 | 20 | F     | F    | 69.2  | 2.2  | 74.6  | 2.8 |
| Cinosulfuron         | 5  | 88.2  | 1.9  | 87.0  | 2.5 | 87.0  | 3.1  | 5  | 57.8  | 2.6 | 67.1  | 1.9  | 75.4  | 2.1 | 5  | 81.5  | 2.7  | 79.7  | 4.2  | 84.6  | 1.5 | 20 | F     | F    | 91.6  | 4.6  | 90.5  | 2.5 |
| ClethodiM Sulfone    | 5  | 99.7  | 0.4  | 96.0  | 3.0 | 91.2  | 4.1  | 1  | 91.9  | 4.8 | 86.4  | 1.4  | 92.6  | 3.8 | 5  | 102.7 | 1.7  | 97.7  | 2.9  | 98.3  | 3.5 | 5  | 104.9 | 4.8  | 98.9  | 6.0  | 97.2  | 1.2 |
| ClethodiM Sulfoxide  | 1  | 126.0 | 3.2  | 114.9 | 3.3 | 93.8  | 5.2  | 1  | 79.1  | 0.8 | 80.3  | 1.4  | 84.1  | 3.6 | 1  | 116.1 | 10.5 | 112.8 | 3.8  | 94.6  | 6.8 | 1  | 113.4 | 0.9  | 107.8 | 1.9  | 97.5  | 1.6 |
| Clethodim            | 1  | 58.6  | 2.3  | 68.2  | 2.6 | 83.6  | 4.1  | 1  | 80.0  | 5.2 | 78.0  | 4.5  | 85.6  | 1.3 | 1  | 62.4  | 18.6 | 60.1  | 5.3  | 81.0  | 3.6 | 1  | 68.8  | 5.7  | 65.7  | 3.1  | 77.8  | 5.0 |
| ClodinaFop-propargyl | 1  | 144.5 | 6.8  | 129.9 | 2.7 | 108.7 | 0.9  | 1  | 142.6 | 1.2 | 134.1 | 0.6  | 110.3 | 1.7 | 1  | 151.6 | 5.3  | 126.9 | 2.2  | 106.2 | 1.3 | 1  | 130.5 | 1.9  | 114.3 | 4.3  | 103.4 | 2.5 |
| Clofentezine         | 10 | F     | F    | 92.1  | 9.6 | 84.0  | 5.0  | 5  | 113.7 | 4.1 | F     | F    | F     | F   | 20 | F     | F    | 111.8 | 1.1  | 102.1 | 4.3 | 10 | F     | F    | 98.8  | 5.8  | 90.9  | 7.2 |

|                  |     |       |      |       |     |       |     |    |       |     |       |     |       |     |    |       |      |       |     |       |      |    |       |      |       |      |       |     |
|------------------|-----|-------|------|-------|-----|-------|-----|----|-------|-----|-------|-----|-------|-----|----|-------|------|-------|-----|-------|------|----|-------|------|-------|------|-------|-----|
| Clomazone        | 1   | 104.7 | 2.5  | 102.7 | 0.6 | 94.8  | 2.9 | 1  | 111.8 | 2.4 | 103.0 | 3.2 | 100.4 | 1.3 | 1  | 112.0 | 2.5  | 105.8 | 2.3 | 100.8 | 3.4  | 1  | 101.7 | 3.0  | 97.7  | 4.0  | 95.0  | 2.0 |
| Clopyralid       | NA  | F     | F    | F     | F   | F     | F   | NA | F     | F   | F     | F   | F     | F   | NA | F     | F    | F     | F   | F     | F    | NA | F     | F    | F     | F    | F     | F   |
| Clothianidin     | 10  | F     | F    | 110.9 | 3.7 | 99.0  | 2.3 | 5  | 140.4 | 3.8 | 122.0 | 1.8 | 112.7 | 0.7 | 5  | 129.8 | 1.6  | 116.1 | 1.1 | 109.9 | 3.4  | 5  | 114.1 | 0.7  | 102.0 | F    | 93.3  | 2.7 |
| Clotrimazole     | 50  | F     | F    | F     | F   | 94.7  | 6.1 | 20 | F     | F   | 81.5  | 3.6 | 118.3 | 3.0 | 50 | F     | F    | F     | F   | 122.1 | 13.5 | 50 | F     | F    | F     | F    | 64.1  | 3.3 |
| Coumaphos        | 5   | 84.3  | 14.8 | 85.8  | 6.3 | 87.6  | 2.9 | 5  | 98.6  | 4.3 | 101.4 | 3.3 | 103.0 | 2.0 | 1  | 105.0 | 4.6  | 102.1 | 1.1 | 99.9  | 1.6  | 20 | F     | F    | 89.5  | 14.0 | 87.3  | 1.6 |
| Coumoxystrobin   | 1   | 98.3  | 9.7  | 106.7 | 2.4 | 94.8  | 5.1 | 1  | 104.2 | 2.5 | 103.3 | 1.2 | 95.0  | 4.3 | 1  | 112.1 | 2.2  | 110.8 | 4.0 | 106.2 | 3.2  | 1  | 106.2 | 3.0  | 103.1 | 2.0  | 96.5  | 1.8 |
| Cyanazine        | 5   | 112.5 | 2.0  | 105.2 | 2.1 | 97.2  | 1.2 | 5  | 120.0 | 1.2 | 112.9 | 3.3 | 101.8 | 2.0 | 5  | 120.0 | 0.9  | 109.3 | 1.5 | 99.7  | 3.0  | 5  | 109.0 | 1.4  | 106.0 | 2.1  | 93.7  | 2.0 |
| Cyantraniliprole | 20  | F     | F    | 96.6  | 2.7 | 90.9  | 3.4 | 20 | F     | F   | 100.1 | 0.6 | 94.3  | 0.8 | 5  | 105.1 | 1.6  | 99.3  | 3.0 | 94.2  | 3.7  | 10 | F     | F    | 92.9  | 7.5  | 84.0  | 3.7 |
| Cyclosulfamuron  | 5   | 99.1  | 8.9  | 97.1  | 2.1 | 90.1  | 4.8 | 1  | 82.6  | 4.3 | 79.4  | 1.4 | 85.6  | 3.0 | 1  | 102.4 | 3.6  | 100.6 | 5.5 | 99.9  | 5.1  | 5  | 92.0  | 3.7  | 92.9  | 4.1  | 89.1  | 2.6 |
| Cycloxydim       | 5   | 42.1  | 6.2  | 55.1  | 3.9 | 81.2  | 3.2 | 1  | 63.3  | 3.6 | 62.1  | 5.1 | 78.6  | 3.7 | 1  | 57.5  | 24.5 | 54.9  | 5.6 | 79.1  | 1.7  | 5  | 44.4  | 7.5  | 48.3  | 5.2  | 66.7  | 6.3 |
| Cyflumetofen     | 1   | 108.0 | 0.8  | 111.9 | 1.0 | 103.1 | 3.8 | 1  | 117.3 | 2.4 | 115.9 | 5.0 | 106.9 | 0.3 | 1  | 115.0 | 8.0  | 114.5 | 6.0 | 110.3 | 0.7  | 1  | 106.0 | 3.1  | 104.0 | 7.4  | 103.0 | 3.2 |
| Cyhalothrin      | 100 | F     | F    | F     | F   | F     | F   | 5  | 118.8 | 5.9 | 126.2 | 3.2 | 109.0 | 5.1 | 5  | 125.3 | 6.8  | 124.9 | 0.2 | 114.6 | 5.3  | 5  | 107.0 | 24.4 | 109.6 | 1.1  | 103.3 | 3.9 |
| Cyhexatin        | NA  | F     | F    | F     | F   | F     | F   | NA | F     | F   | F     | F   | F     | F   | NA | F     | F    | F     | F   | F     | F    | NA | F     | F    | F     | F    | F     | F   |

|               |    |       |      |       |      |       |      |        |       |      |       |      |       |      |    |       |      |       |      |       |      |    |       |      |       |     |       |      |
|---------------|----|-------|------|-------|------|-------|------|--------|-------|------|-------|------|-------|------|----|-------|------|-------|------|-------|------|----|-------|------|-------|-----|-------|------|
| Cymoxanil     | 5  | 107.3 | 2.8  | 104.2 | 2.4  | 92.3  | 3.1  | 1      | 105.1 | 3.0  | 103.2 | 1.7  | 94.3  | 0.5  | 1  | 111.3 | 1.4  | 102.1 | 0.7  | 93.2  | 1.2  | 5  | 91.5  | 1.3  | 90.0  | 3.0 | 81.2  | 3.9  |
| Cypermethrin  | 50 | F     | F    | F     | F    | 97.4  | 3.0  | 50     | F     | F    | F     | F    | 121.3 | 5.1  | 5  | 82.2  | 7.6  | 103.1 | 5.4  | 101.9 | 2.6  | 10 | F     | F    | 85.4  | 3.0 | 88.5  | 2.6  |
| Cyproconazole | 5  | 104.4 | 8.9  | 89.5  | 8.9  | 89.0  | 4.2  | 5      | 101.7 | 1.8  | 95.6  | 1.5  | 96.1  | 2.5  | 5  | 100.5 | 4.6  | 92.8  | 4.8  | 96.5  | 8.2  | 5  | 101.3 | 6.4  | 90.7  | 2.0 | 87.7  | 2.0  |
| Cyprodinil    | 1  | 105.3 | 1.8  | 103.3 | 3.9  | 94.9  | 1.3  | 1      | 101.3 | 2.5  | 100.6 | 1.5  | 93.0  | 1.6  | 1  | 106.4 | 2.1  | 99.1  | 2.4  | 97.1  | 3.2  | 1  | 95.6  | 0.3  | 96.2  | 4.1 | 89.4  | 1.6  |
| Cyromazine    | 5  | 38.4  | 6.8  | 39.4  | 2.0  | 41.1  | 13.5 | 5      | 28.6  | 0.5  | 30.1  | 5.2  | 37.2  | 7.0  | 1  | 33.1  | 9.5  | 33.9  | 7.6  | 40.6  | 0.9  | 1  | 29.0  | 10.9 | 27.9  | 5.4 | 34.6  | 4.1  |
| Daminozide    | 10 | F     | F    | 24.4  | 8.9  | 13.5  | 13.9 | 10     | F     | F    | 20.5  | 19.5 | 6.4   | 23.5 | 5  | 86.0  | 5.1  | 28.1  | 10.8 | 15.4  | 32.7 | 10 | F     | F    | 58.1  | 7.4 | 28.6  | 11.5 |
| Dazomet       | 20 | F     | F    | 48.4  | 4.0  | 66.5  | 6.7  | 1      | 14.6  | 30.8 | 24.2  | 8.7  | 53.1  | 13.6 | 5  | 37.9  | 6.4  | 40.6  | 3.6  | 60.8  | 2.7  | 50 | F     | F    | F     | F   | 55.2  | 12.4 |
| Deltamethrin  | 20 | F     | F    | 108.6 | 6.1  | 107.4 | 4.7  | 20     | F     | F    | 121.4 | 5.9  | 116.6 | 5.8  | 5  | 76.5  | 14.1 | 97.3  | 13.0 | 95.8  | 5.7  | 5  | 84.2  | 15.2 | 95.2  | 3.5 | 79.8  | 6.7  |
| Demeton-S     | 5  | 108.7 | 10.8 | 126.0 | 11.1 | 91.3  | 6.5  | 5      | 153.6 | 21.5 | 116.7 | 11.5 | 86.1  | 4.9  | 5  | 87.1  | 9.6  | 109.0 | 5.7  | 96.9  | 3.5  | 5  | 152.0 | 4.7  | 117.4 | 7.4 | 101.8 | 4.2  |
| Desmedipham   | 5  | 110.8 | 2.3  | 110.1 | 4.6  | 96.2  | 5.0  | 1      | 109.8 | 1.8  | 103.3 | 4.9  | 104.4 | 1.5  | 5  | 112.3 | 1.6  | 108.2 | 4.8  | 103.8 | 4.5  | 5  | 97.5  | 2.6  | 91.2  | 7.4 | 95.7  | 3.1  |
| Diafenthiuron | 50 | F     | F    | F     | F    | 4.8   | 30.8 | 5      | 7.1   | 5.1  | 12.1  | 9.2  | 49.2  | 15.5 | 20 | F     | F    | 2.0   | 16.4 | 15.5  | 0.5  | 20 | F     | F    | 7.4   | 1.7 | 19.0  | 24.7 |
| Diazinon      | 1  | 109.1 | 4.1  | 112.5 | 2.0  | 104.4 | 2.4  | 1      | 108.4 | 5.6  | 110.7 | 1.9  | 106.4 | 5.1  | 1  | 107.8 | 6.0  | 104.0 | 2.2  | 102.6 | 0.8  | 1  | 107.9 | 4.5  | 109.1 | 1.2 | 105.0 | 1.4  |
| Dicamba       | 50 | F     | F    | F     | F    | 9.9   | 14.8 | N<br>A | F     | F    | F     | F    | F     | F    | 50 | F     | F    | F     | F    | 22.4  | 40.2 | 20 | F     | F    | 8.6   | 1.2 | 28.9  | 19.4 |

|                 |    |       |     |       |     |       |     |    |       |     |       |      |       |      |    |       |      |       |      |       |     |    |       |     |       |      |       |      |
|-----------------|----|-------|-----|-------|-----|-------|-----|----|-------|-----|-------|------|-------|------|----|-------|------|-------|------|-------|-----|----|-------|-----|-------|------|-------|------|
| Dichlofluanid   | 5  | 101.1 | 5.6 | 99.0  | 7.6 | 94.5  | 7.3 | 1  | 108.7 | 2.0 | 103.4 | 2.7  | 101.7 | 4.0  | 20 | F     | F    | 108.0 | 5.3  | 108.5 | 9.2 | 5  | 99.5  | 5.1 | 99.7  | 14.6 | 94.2  | 0.9  |
| Dichlorvos      | 5  | 95.3  | 0.8 | 106.1 | 1.7 | 102.5 | 0.2 | 5  | 98.4  | 4.7 | 105.9 | 1.5  | 102.0 | 1.3  | 5  | 97.2  | 2.4  | 96.4  | 2.1  | 97.4  | 1.6 | 5  | 92.2  | 0.9 | 102.2 | 2.9  | 96.7  | 2.0  |
| Diclofop-methyl | 10 | F     | F   | 125.8 | 0.4 | 114.3 | 3.2 | 5  | 148.5 | 5.9 | 140.0 | 6.1  | 113.8 | 5.0  | 50 | F     | F    | F     | F    | 115.5 | 2.5 | 10 | F     | F   | 125.0 | 4.0  | 114.4 | 4.2  |
| Diethofencarb   | 5  | 125.1 | 1.2 | 107.2 | 4.0 | 94.8  | 3.0 | 5  | 143.8 | 4.5 | 111.8 | 3.7  | 105.0 | 2.1  | 5  | 146.2 | 2.8  | 120.3 | 2.0  | 108.8 | 1.4 | 5  | 140.5 | 2.6 | 115.5 | 4.1  | 104.0 | 1.0  |
| Difenoconazole  | 5  | 98.7  | 4.5 | 88.4  | 8.8 | 75.2  | 8.6 | 1  | 81.6  | 6.7 | 93.7  | 10.5 | 111.6 | 2.6  | 5  | 100.8 | 9.1  | 87.5  | 19.2 | 98.4  | 2.1 | 5  | 106.3 | 5.0 | 108.1 | 2.4  | 100.7 | 0.8  |
| Difenzoquat     | 1  | 105.4 | 2.7 | 98.6  | 4.0 | 95.3  | 3.4 | 1  | 105.3 | 6.3 | 103.2 | 1.3  | 101.6 | 1.5  | 1  | 104.1 | 2.0  | 101.0 | 1.4  | 94.7  | 1.4 | 5  | 89.9  | 2.0 | 88.2  | 3.3  | 83.6  | 1.4  |
| Diflubenzuron   | 5  | 192.3 | 2.6 | 172.0 | 1.6 | 132.5 | 2.0 | 5  | 280.9 | 5.0 | 227.2 | 1.7  | 154.9 | 1.8  | 5  | 251.1 | 2.2  | 193.7 | 3.4  | 135.6 | 0.7 | 5  | 243.3 | 1.3 | 195.4 | 4.0  | 138.2 | 2.6  |
| Diflufenican    | 20 | F     | F   | 110.8 | 8.5 | 102.1 | 4.4 | 20 | F     | F   | 115.8 | 11.7 | 107.0 | 12.6 | 1  | 111.6 | 11.8 | 108.9 | 10.2 | 104.3 | 9.1 | 10 | F     | F   | 88.0  | 3.6  | 102.3 | 12.0 |
| Dimepiperate    | 5  | 104.8 | 7.2 | 100.7 | 2.6 | 91.9  | 1.0 | 5  | 118.2 | 6.2 | 109.9 | 1.6  | 98.4  | 3.7  | 5  | 117.4 | 3.5  | 113.9 | 4.9  | 104.8 | 2.9 | 5  | 109.7 | 2.6 | 108.8 | 5.5  | 98.3  | 2.8  |
| Dimethenamid    | 1  | 109.8 | 2.2 | 113.8 | 1.4 | 101.7 | 2.3 | 1  | 115.9 | 4.3 | 114.7 | 4.7  | 108.3 | 1.7  | 1  | 112.9 | 3.7  | 111.1 | 4.2  | 108.1 | 3.3 | 1  | 110.3 | 1.9 | 117.0 | 7.5  | 107.9 | 2.1  |
| Dimethoate      | 1  | 116.8 | 2.4 | 119.5 | 3.8 | 103.2 | 0.1 | 1  | 123.8 | 2.4 | 119.6 | 2.7  | 106.4 | 2.1  | 1  | 118.0 | 4.5  | 114.5 | 3.7  | 108.3 | 4.1 | 1  | 106.6 | 2.0 | 108.0 | 0.5  | 95.9  | 2.2  |
| Dimethomorph    | 5  | 112.2 | 6.2 | 99.3  | 4.4 | 95.2  | 3.8 | 50 | F     | F   | F     | F    | 105.9 | 2.0  | 5  | 125.6 | 0.3  | 115.3 | 3.3  | 116.0 | 2.0 | 50 | F     | F   | F     | F    | 103.4 | 2.1  |
| Diniconazole    | 5  | 93.8  | 4.7 | 99.9  | 4.4 | 95.8  | 4.7 | 5  | 93.9  | 3.7 | 94.6  | 1.4  | 101.2 | 3.4  | 5  | 94.8  | 3.3  | 98.2  | 3.1  | 97.4  | 3.9 | 5  | 94.9  | 2.7 | 100.1 | 1.7  | 97.8  | 1.8  |

|                      |    |       |     |       |     |       |      |    |       |      |       |      |       |      |    |       |     |       |     |       |     |    |       |     |       |     |       |     |
|----------------------|----|-------|-----|-------|-----|-------|------|----|-------|------|-------|------|-------|------|----|-------|-----|-------|-----|-------|-----|----|-------|-----|-------|-----|-------|-----|
| Dinocap              | 50 | F     | F   | F     | F   | 74.3  | 27.3 | 50 | F     | F    | F     | F    | 93.0  | 18.3 | 50 | F     | F   | F     | F   | 53.9  | 6.9 | NA | F     | F   | F     | F   | F     | F   |
| Dinotefuran          | 5  | 116.1 | 1.7 | 118.8 | 1.9 | 100.0 | 2.6  | 1  | 132.0 | 6.5  | 129.2 | 1.7  | 114.6 | 1.4  | 1  | 124.2 | 2.1 | 116.2 | 2.4 | 104.7 | 3.3 | 5  | 101.1 | 2.0 | 102.5 | F   | 90.7  | 1.9 |
| Diphenylamine        | 10 | F     | F   | 54.3  | 9.0 | 66.9  | 1.3  | 5  | 94.1  | 4.5  | 84.2  | 2.8  | 95.0  | 4.1  | 5  | 99.7  | 5.0 | 95.5  | 0.8 | 99.9  | 6.0 | 10 | F     | F   | 83.9  | 0.2 | 84.0  | 1.2 |
| Disulfoton sulfone   | 1  | 119.6 | 2.4 | 108.2 | 3.6 | 99.8  | 4.6  | 1  | 130.4 | 5.2  | 115.5 | 3.7  | 105.6 | 3.8  | 1  | 125.4 | 1.9 | 118.5 | 1.6 | 107.2 | 2.8 | 1  | 112.9 | 2.6 | 106.6 | 4.0 | 99.4  | 2.8 |
| Disulfoton-sulfoxide | 1  | 133.0 | 1.1 | 122.6 | 4.8 | 102.6 | 0.9  | 1  | 125.0 | 4.1  | 113.8 | 4.2  | 109.4 | 2.9  | 1  | 136.4 | 7.6 | 133.5 | 2.5 | 112.9 | 4.1 | 1  | 120.2 | 2.3 | 114.9 | 3.8 | 102.0 | 2.7 |
| Disulfoton           | 50 | F     | F   | F     | F   | 77.7  | 10.6 | 5  | 70.2  | 24.5 | 101.1 | 12.5 | 109.5 | 13.9 | 20 | F     | F   | 63.0  | 0.5 | 86.3  | 2.4 | 50 | F     | F   | F     | F   | 99.5  | 6.1 |
| Dithianon            | NA | F     | F   | F     | F   | F     | F    | NA | F     | F    | F     | F    | F     | F    | NA | F     | F   | F     | F   | F     | F   | NA | F     | F   | F     | F   | F     | F   |
| Diuron               | 5  | 121.0 | 2.1 | 119.0 | 0.9 | 107.1 | 1.0  | 1  | 119.8 | 3.8  | 119.8 | 0.5  | 109.9 | 3.6  | 1  | 119.6 | 0.6 | 111.9 | 1.8 | 102.9 | 6.4 | 1  | 110.2 | 4.3 | 111.0 | F   | 103.4 | 1.8 |
| Dodine               | 1  | 137.3 | 4.7 | 119.2 | 3.2 | 94.2  | 3.1  | 1  | 140.7 | 2.6  | 121.2 | 0.7  | 103.3 | 2.1  | 1  | 141.9 | 3.4 | 116.9 | 3.6 | 101.2 | 2.3 | 1  | 132.4 | 1.1 | 114.6 | 3.3 | 96.1  | 1.8 |
| Dufulin              | 1  | 106.3 | 7.4 | 98.5  | 6.2 | 91.8  | 2.5  | 1  | 110.7 | 1.5  | 107.6 | 1.7  | 97.0  | 2.5  | 1  | 106.9 | 3.7 | 102.2 | 2.5 | 97.9  | 2.8 | 1  | 99.1  | 5.2 | 98.9  | 4.3 | 92.4  | 1.1 |
| Edifenphos           | 1  | 124.1 | 6.9 | 123.3 | 1.0 | 109.3 | 2.1  | 1  | 128.1 | 4.4  | 122.1 | 3.5  | 109.0 | 5.3  | 1  | 128.4 | 6.5 | 117.1 | 2.0 | 109.7 | 1.0 | 1  | 120.8 | 4.7 | 117.8 | 2.8 | 108.9 | 1.2 |
| Emamectin B1A        | 5  | 82.5  | 3.4 | 88.3  | 8.1 | 86.9  | 3.6  | 5  | 91.7  | 2.1  | 96.2  | 7.2  | 92.4  | 1.5  | 5  | 92.6  | 1.4 | 90.9  | 1.8 | 89.4  | 5.3 | 5  | 78.0  | 3.9 | 82.8  | 0.8 | 85.4  | 1.7 |
| Endosulfansulfate    | 5  | 88.7  | 4.8 | 84.4  | 6.6 | 90.7  | 3.4  | 5  | 84.8  | 2.5  | 82.2  | 4.4  | 85.0  | 2.6  | 5  | 99.4  | 7.2 | 100.8 | 4.7 | 101.1 | 3.6 | 5  | 83.5  | 1.6 | 78.8  | 5.2 | 82.6  | 5.2 |



|                 |    |       |     |       |     |       |     |    |       |      |       |      |       |     |    |       |      |       |      |       |      |    |       |     |       |      |       |      |
|-----------------|----|-------|-----|-------|-----|-------|-----|----|-------|------|-------|------|-------|-----|----|-------|------|-------|------|-------|------|----|-------|-----|-------|------|-------|------|
| Enestroburin    | 1  | 107.8 | 2.4 | 110.2 | 1.7 | 99.4  | 3.7 | 1  | 116.3 | 2.2  | 115.8 | 2.1  | 103.7 | 7.4 | 1  | 113.7 | 4.3  | 108.0 | 0.9  | 104.5 | 1.5  | 1  | 105.6 | 5.4 | 105.0 | 7.6  | 101.6 | 5.0  |
| Epoxiconazole   | 5  | 108.2 | 0.7 | 106.3 | 0.8 | 102.5 | 1.9 | 1  | 112.2 | 7.8  | 110.4 | 2.3  | 99.5  | 3.3 | 1  | 109.0 | 3.5  | 106.5 | 2.9  | 104.1 | 1.3  | 5  | 105.2 | 3.5 | 105.7 | 1.4  | 103.3 | 0.8  |
| Ethametsulfuron | NA | F     | F   | F     | F   | F     | F   | NA | F     | F    | F     | F    | F     | F   | NA | F     | F    | F     | F    | F     | F    | NA | F     | F   | F     | F    | F     | F    |
| Ethion          | 5  | 95.2  | 1.5 | 95.7  | 4.6 | 89.9  | 2.5 | 1  | 106.1 | 3.9  | 91.6  | 7.3  | 97.6  | 2.7 | 1  | 105.1 | 2.7  | 100.5 | 3.3  | 99.2  | 2.8  | 1  | 97.8  | 8.2 | 90.6  | F    | 88.2  | 6.3  |
| Ethiprole       | 5  | 118.3 | 1.2 | 109.2 | 1.5 | 100.9 | 1.6 | 5  | 135.7 | 3.0  | 119.5 | 7.9  | 114.2 | 2.0 | 5  | 131.5 | 0.4  | 119.0 | 2.9  | 113.3 | 2.9  | 5  | 127.4 | 4.6 | 114.1 | 1.9  | 104.4 | 5.6  |
| Ethirimol       | 1  | 87.6  | 1.5 | 88.5  | 2.5 | 85.7  | 4.3 | 1  | 88.1  | 1.5  | 84.5  | 2.7  | 86.5  | 2.0 | 1  | 90.5  | 0.6  | 86.5  | 0.8  | 86.0  | 0.5  | 1  | 71.7  | 2.1 | 70.1  | 3.0  | 71.6  | 3.7  |
| Ethofenprox     | 1  | 99.3  | 2.5 | 103.0 | 2.9 | 97.7  | 1.0 | 1  | 105.0 | 4.7  | 104.2 | 4.8  | 100.5 | 3.1 | 1  | 108.9 | 7.1  | 105.7 | 4.6  | 104.8 | 3.7  | 1  | 95.1  | 4.5 | 94.6  | 2.0  | 93.3  | 3.3  |
| Ethofumesate    | 1  | 110.0 | 3.4 | 104.1 | 3.2 | 94.3  | 3.7 | 1  | 120.2 | 4.3  | 105.2 | 3.4  | 104.0 | 2.3 | 1  | 121.1 | 1.7  | 111.9 | 0.2  | 105.3 | 1.3  | 1  | 109.1 | 0.9 | 103.2 | 2.6  | 100.6 | 2.2  |
| Ethoprophos     | 1  | 110.0 | 4.9 | 105.5 | 1.2 | 95.0  | 2.0 | 1  | 118.3 | 3.7  | 111.5 | 0.8  | 97.3  | 3.2 | 1  | 117.9 | 3.0  | 108.4 | 1.2  | 101.7 | 2.8  | 1  | 107.6 | 0.5 | 104.6 | 2.1  | 93.8  | 0.1  |
| Ethoxyquin      | 50 | F     | F   | F     | F   | F     | F   | 1  | 2.9   | 19.7 | 6.6   | 17.6 | 29.8  | 3.3 | 5  | 22.1  | 19.3 | 25.0  | 10.9 | 36.8  | 4.2  | 5  | 2.2   | 7.7 | 5.3   | 3.2  | 21.5  | 16.9 |
| Ethoxysulfuron  | 10 | F     | F   | 55.2  | 7.9 | 65.3  | 5.4 | 5  | 16.1  | 21.0 | 33.8  | 5.2  | 56.9  | 5.3 | 20 | F     | F    | 45.9  | 6.4  | 68.7  | 15.2 | 5  | 62.6  | 6.2 | 64.4  | 67.2 | 72.4  | 4.3  |
| Etoazole        | 1  | 112.4 | 2.3 | 105.8 | 2.8 | 98.9  | 4.9 | 1  | 110.7 | 0.6  | 101.6 | 4.6  | 101.3 | 1.8 | 1  | 113.4 | 2.3  | 102.8 | 2.7  | 100.0 | 2.3  | 1  | 104.0 | 1.9 | 93.6  | 5.5  | 92.5  | 3.2  |
| Famoxadone      | 5  | 122.6 | 7.6 | 118.7 | 2.3 | 105.7 | 2.5 | 1  | 122.3 | 7.5  | 118.0 | 4.5  | 117.6 | 0.9 | 5  | 161.6 | 3.3  | 141.6 | 3.3  | 120.4 | 2.4  | 5  | 138.9 | 0.8 | 123.1 | 1.5  | 109.1 | 3.1  |

|                      |    |       |     |       |     |       |      |    |       |      |       |     |       |      |    |       |      |       |      |       |     |    |       |     |       |     |       |     |
|----------------------|----|-------|-----|-------|-----|-------|------|----|-------|------|-------|-----|-------|------|----|-------|------|-------|------|-------|-----|----|-------|-----|-------|-----|-------|-----|
| Fenamidone           | 1  | 99.9  | 2.2 | 98.2  | 1.6 | 89.6  | 0.5  | 1  | 117.2 | 5.5  | 109.0 | 0.9 | 98.4  | 3.5  | 1  | 118.8 | 2.8  | 112.1 | 0.3  | 102.8 | 1.5 | 1  | 107.6 | 0.9 | 106.9 | 4.4 | 95.9  | 2.7 |
| Fenaminstrobin       | 1  | 102.0 | 2.0 | 106.0 | 2.1 | 97.2  | 2.4  | 1  | 111.5 | 3.9  | 107.4 | 4.8 | 98.5  | 2.3  | 1  | 100.7 | 11.9 | 103.0 | 4.7  | 97.0  | 1.1 | 1  | 96.8  | 1.9 | 94.6  | 2.9 | 89.2  | 2.9 |
| Fenamiphos sulFone   | 1  | 105.5 | 4.8 | 109.2 | 1.0 | 101.5 | 2.2  | 1  | 110.5 | 2.4  | 107.5 | 4.0 | 104.1 | 0.2  | 1  | 111.2 | 3.1  | 105.9 | 1.6  | 107.9 | 2.6 | 1  | 105.7 | 2.1 | 110.9 | 2.1 | 104.9 | 1.8 |
| Fenamiphos sulFoxide | 1  | 105.8 | 2.4 | 109.7 | 1.0 | 102.0 | 0.8  | 1  | 121.9 | 6.4  | 119.1 | 4.4 | 109.2 | 4.2  | 1  | 119.8 | 8.1  | 114.7 | 4.6  | 111.7 | 3.2 | 1  | 112.1 | 3.0 | 117.2 | 2.2 | 104.2 | 1.0 |
| Fenamiphos           | 1  | 110.9 | 2.7 | 115.0 | 1.7 | 106.9 | 3.5  | 1  | 118.0 | 9.7  | 122.7 | 3.1 | 107.6 | 3.8  | 1  | 118.4 | 5.0  | 116.4 | 3.0  | 111.1 | 3.0 | 1  | 104.4 | 1.8 | 114.3 | 1.8 | 104.3 | 1.3 |
| Fenarimol            | 5  | 97.9  | 4.1 | 96.9  | 0.6 | 91.6  | 2.8  | 10 | F     | F    | 95.1  | 5.2 | 90.6  | 3.7  | 10 | F     | F    | F     | F    | F     | F   | 50 | F     | F   | F     | F   | 86.9  | 3.2 |
| Fenazaquin           | 1  | 95.5  | 6.8 | 94.4  | 2.7 | 88.9  | 1.9  | 1  | 113.3 | 2.7  | 106.0 | 0.2 | 98.4  | 3.4  | 1  | 112.6 | 2.1  | 101.2 | 0.5  | 97.5  | 1.5 | 1  | 101.6 | 3.5 | 94.7  | 4.0 | 88.3  | 2.4 |
| Fenbuconazole        | 1  | 108.3 | 3.6 | 105.2 | 3.5 | 96.7  | 3.6  | 5  | 110.2 | 3.0  | 103.1 | 0.8 | 99.9  | 1.8  | 5  | 110.9 | 1.8  | 104.5 | 2.0  | 102.6 | 3.6 | 5  | 108.4 | 2.9 | 101.9 | 5.3 | 98.3  | 1.2 |
| Fenbutatinoxide      | NA | F     | F   | F     | F   | F     | F    | NA | F     | F    | F     | F   | F     | F    | NA | F     | F    | F     | F    | F     | F   | NA | F     | F   | F     | F   | F     | F   |
| Fenhexamid           | 50 | F     | F   | F     | F   | 91.0  | 1.2  | 10 | F     | F    | 98.7  | 4.8 | 95.3  | 2.8  | 10 | F     | F    | 100.7 | 6.0  | 97.3  | 2.0 | 1  | 100.1 | 4.5 | 94.7  | 2.4 | 88.6  | 3.7 |
| Fenobucarb           | 1  | 110.9 | 3.1 | 104.2 | 4.5 | 97.1  | 4.0  | 5  | 112.8 | 3.0  | 101.3 | 3.5 | 100.9 | 1.4  | 1  | 108.7 | 0.9  | 102.5 | 2.1  | 99.9  | 2.0 | 1  | 104.0 | 2.0 | 96.2  | 4.4 | 94.0  | 2.4 |
| Fenothiocarb         | 1  | 117.5 | 2.1 | 119.9 | 3.3 | 106.7 | 1.7  | 1  | 120.8 | 5.6  | 122.2 | 4.3 | 112.0 | 2.9  | 1  | 122.0 | 5.7  | 115.5 | 1.0  | 110.6 | 1.9 | 1  | 116.1 | 4.5 | 120.0 | 4.1 | 110.0 | 4.2 |
| Fenoxanil            | 5  | 89.7  | 5.3 | 89.8  | 0.8 | 92.6  | 17.0 | 1  | 119.4 | 41.1 | 31.9  | 5.9 | 92.0  | 35.8 | 5  | 65.8  | 65.1 | 58.3  | 63.1 | 106.7 | 7.8 | 5  | 111.3 | 2.5 | 114.5 | 2.3 | 100.5 | 7.0 |

|                     |    |       |      |       |     |       |     |    |       |      |       |      |       |     |    |       |      |       |     |       |     |    |       |      |       |      |       |     |
|---------------------|----|-------|------|-------|-----|-------|-----|----|-------|------|-------|------|-------|-----|----|-------|------|-------|-----|-------|-----|----|-------|------|-------|------|-------|-----|
| Fenoxaprop-ethyl    | 1  | 103.9 | 5.6  | 104.2 | 3.9 | 96.9  | 1.5 | 1  | 118.6 | 3.2  | 107.7 | 4.9  | 99.5  | 1.3 | 1  | 113.2 | 2.0  | 108.5 | 1.5 | 96.8  | 1.3 | 1  | 99.9  | 5.9  | 100.0 | 2.3  | 92.5  | 1.8 |
| Fenpropathrin       | 10 | F     | F    | 104.2 | 4.5 | 95.2  | 2.4 | 1  | 87.9  | 51.2 | 103.2 | 14.3 | 99.4  | 6.4 | 20 | F     | F    | 103.1 | 1.3 | 94.9  | 3.9 | 20 | F     | F    | 96.6  | 2.3  | 95.0  | 1.4 |
| Fenpropidin         | 1  | 107.5 | 2.4  | 109.3 | 3.0 | 100.5 | 0.6 | 5  | 105.4 | 5.6  | 105.6 | 2.3  | 103.1 | 4.1 | 1  | 110.0 | 2.7  | 105.5 | 2.4 | 108.3 | 1.5 | 1  | 92.9  | 3.1  | 97.6  | 5.3  | 93.4  | 1.4 |
| Fenpropimorph       | 1  | 99.0  | 4.2  | 95.5  | 2.7 | 92.8  | 3.5 | 1  | 98.6  | 1.5  | 93.3  | 0.5  | 100.5 | 3.8 | 1  | 104.4 | 4.6  | 99.5  | 3.5 | 99.9  | 2.7 | 1  | 95.2  | 1.6  | 92.1  | 1.3  | 92.2  | 1.9 |
| Fenpyroximate       | 1  | 94.6  | 5.9  | 91.0  | 6.0 | 92.2  | 7.7 | 1  | 95.0  | 5.1  | 89.5  | 3.8  | 98.1  | 5.2 | 1  | 93.2  | 4.4  | 91.0  | 5.8 | 92.1  | 4.1 | 1  | 94.1  | 2.9  | 79.0  | 3.1  | 87.0  | 5.9 |
| Fenthion sulfone    | 1  | 109.2 | 3.5  | 110.6 | 0.8 | 102.6 | 3.2 | 1  | 104.3 | 2.4  | 107.7 | 1.5  | 104.6 | 0.5 | 1  | 116.2 | 3.3  | 112.3 | 5.9 | 108.0 | 2.6 | 1  | 100.8 | 4.2  | 106.9 | 3.8  | 105.6 | 1.2 |
| Fenthion sulfoxide  | 1  | 115.9 | 4.0  | 117.8 | 1.8 | 105.0 | 2.5 | 1  | 125.0 | 2.5  | 117.2 | 4.5  | 110.3 | 2.1 | 1  | 123.9 | 2.9  | 116.8 | 1.9 | 112.8 | 3.7 | 1  | 114.5 | 2.0  | 117.7 | 2.3  | 108.2 | 3.6 |
| Fenthion            | 5  | 105.2 | 3.5  | 104.8 | 6.6 | 92.3  | 5.2 | 5  | 88.0  | 11.4 | 112.1 | 1.3  | 108.6 | 3.6 | 20 | F     | F    | 104.9 | 6.7 | 91.9  | 2.6 | 5  | 94.2  | 7.5  | 114.8 | 2.0  | 94.8  | 8.3 |
| Fentinacetate       | NA | F     | F    | F     | F   | F     | F   | NA | F     | F    | F     | F    | F     | F   | NA | F     | F    | F     | F   | F     | F   | NA | F     | F    | F     | F    | F     | F   |
| Fenvalerate         | 5  | 71.8  | 10.2 | 104.9 | 9.2 | 94.1  | 7.7 | 5  | 93.4  | 14.1 | 116.2 | 3.7  | 112.2 | 6.0 | 5  | 81.6  | 28.7 | 110.4 | 8.0 | 107.2 | 8.2 | 5  | 64.1  | 12.2 | 82.6  | 4.8  | 81.1  | 4.3 |
| Fipronil-desulfinyl | 5  | 98.4  | 4.5  | 98.3  | 3.8 | 96.9  | 3.1 | 1  | 106.1 | 3.3  | 100.6 | 3.1  | 99.6  | 4.1 | 5  | 104.6 | 1.6  | 97.6  | 1.4 | 97.3  | 2.3 | 5  | 91.3  | 1.4  | 92.0  | 10.0 | 87.1  | 2.2 |
| Fipronil-sulfide    | 1  | 97.2  | 0.2  | 104.7 | 1.2 | 101.5 | 3.7 | 1  | 106.4 | 2.5  | 103.1 | 1.3  | 102.0 | 6.9 | 1  | 100.9 | 2.1  | 97.2  | 2.0 | 99.0  | 2.3 | 1  | 96.2  | 4.2  | 98.7  | 3.0  | 96.1  | 1.0 |
| Fipronil-sulfone    | 5  | 138.8 | 7.8  | 131.3 | 3.8 | 106.7 | 2.4 | 5  | 183.4 | 1.4  | 163.9 | 3.1  | 133.2 | 5.2 | 5  | 193.8 | 9.2  | 168.8 | 2.4 | 131.1 | 1.8 | 5  | 169.9 | 4.4  | 162.6 | 4.3  | 124.9 | 5.5 |

|                 |     |       |      |       |     |       |     |    |       |      |       |     |       |     |    |       |      |       |      |       |      |    |       |      |       |     |       |      |
|-----------------|-----|-------|------|-------|-----|-------|-----|----|-------|------|-------|-----|-------|-----|----|-------|------|-------|------|-------|------|----|-------|------|-------|-----|-------|------|
| Fipronil        | 5   | 127.2 | 4.3  | 134.6 | 5.8 | 112.1 | 4.1 | 5  | 185.1 | 4.0  | 163.5 | 8.8 | 133.6 | 5.1 | 5  | 175.6 | 10.8 | 149.4 | 3.6  | 128.2 | 1.3  | 5  | 163.0 | 7.4  | 159.4 | 2.1 | 128.7 | 8.2  |
| Flonicamid      | 5   | 102.7 | 15.6 | 114.9 | 7.0 | 99.2  | 3.7 | 50 | F     | F    | F     | F   | 113.0 | 4.8 | 5  | 117.4 | 3.6  | 109.6 | 3.8  | 103.1 | 4.6  | 5  | 58.0  | 16.3 | 67.9  | 9.2 | 102.3 | 2.6  |
| Florasulam      | 20  | F     | F    | 73.8  | 8.0 | 78.8  | 8.3 | 5  | 36.5  | 9.6  | 47.7  | 7.8 | 68.2  | 2.7 | 5  | 61.1  | 8.1  | 68.0  | 3.4  | 79.4  | 6.3  | 5  | 74.8  | 6.4  | 81.4  | 4.4 | 85.0  | 11.4 |
| Fluazifop-butyl | 1   | 112.8 | 1.6  | 115.9 | 5.5 | 106.4 | 1.1 | 1  | F     | F    | F     | F   | F     | F   | 1  | 116.9 | 3.3  | 109.6 | F    | 107.0 | 1.8  | 1  | 105.4 | 3.7  | 103.6 | 1.0 | 104.0 | 0.9  |
| Fluazinam       | 10  | F     | F    | 97.0  | 1.0 | 97.0  | 5.8 | 5  | 97.9  | 5.3  | 96.7  | 0.6 | 92.2  | 0.3 | 20 | F     | F    | 90.7  | 0.5  | 94.1  | 3.2  | 5  | 93.7  | 3.9  | 93.7  | 3.5 | 89.5  | 4.2  |
| Flubendiamide   | 20  | F     | F    | 184.2 | 1.5 | 143.0 | 2.2 | 50 | F     | F    | F     | F   | 147.3 | 2.8 | 50 | F     | F    | F     | F    | 142.7 | 2.4  | 20 | F     | F    | 185.7 | 5.6 | 147.6 | 3.8  |
| Flucarbazone    | 100 | F     | F    | F     | F   | F     | F   | 10 | F     | F    | 27.3  | 9.4 | 59.0  | 3.0 | 20 | F     | F    | 27.8  | 13.6 | 55.0  | 14.3 | 10 | 7.4   | 45.3 | 29.1  | 4.0 | 46.9  | 7.8  |
| Flucetosulfuron | 10  | F     | F    | 71.9  | 7.9 | 80.2  | 1.4 | 5  | 18.0  | 29.3 | 37.7  | 6.6 | 64.2  | 0.1 | 10 | F     | F    | 59.8  | 1.1  | 79.8  | 7.1  | 5  | 65.3  | 11.8 | 76.5  | 6.3 | 83.5  | 4.3  |
| Flucythrinate   | 20  | F     | F    | 114.5 | 4.7 | 106.6 | 3.8 | 20 | F     | F    | 116.2 | 2.6 | 105.8 | 2.2 | 10 | F     | F    | 111.7 | 1.0  | 105.8 | 0.7  | 20 | F     | F    | 113.2 | 2.2 | 108.4 | 4.7  |
| Fludioxonil     | 1   | 113.6 | 2.2  | 115.1 | 1.8 | 106.6 | 1.5 | 1  | 107.9 | 3.6  | 105.5 | 1.4 | 101.9 | 1.6 | 1  | 103.7 | 5.0  | 105.9 | 1.5  | 107.9 | 2.3  | 5  | 102.7 | 2.1  | 99.5  | 1.0 | 97.4  | 1.2  |
| Flufenacet      | 1   | 112.4 | 2.8  | 113.2 | 4.2 | 104.8 | 1.4 | 1  | 122.4 | 5.2  | 120.3 | 2.7 | 110.5 | 5.0 | 1  | 119.1 | 4.7  | 114.7 | 2.7  | 112.3 | 5.7  | 5  | 117.9 | 3.6  | 118.3 | 2.2 | 107.3 | 2.7  |
| Flufenoxuron    | 20  | F     | F    | 98.3  | 5.6 | 92.2  | 7.0 | 20 | F     | F    | 102.9 | 3.1 | 99.6  | 3.6 | 20 | F     | F    | 99.4  | 6.1  | 92.5  | 4.3  | 20 | F     | F    | 88.1  | 2.0 | 87.0  | 4.0  |
| Flufiprole      | 1   | 113.9 | 9.3  | 113.2 | 2.7 | 93.7  | 2.9 | 1  | 106.8 | 3.9  | 108.4 | 0.5 | 98.0  | 0.6 | 1  | 116.4 | 4.0  | 107.5 | 0.6  | 97.3  | 4.8  | 5  | 94.4  | 2.0  | 94.5  | 0.8 | 87.4  | 4.3  |

|                      |    |       |      |       |     |       |     |    |       |     |       |     |       |      |    |       |     |       |     |       |      |    |       |      |       |      |       |      |
|----------------------|----|-------|------|-------|-----|-------|-----|----|-------|-----|-------|-----|-------|------|----|-------|-----|-------|-----|-------|------|----|-------|------|-------|------|-------|------|
| Flumetrain           | NA | F     | F    | F     | F   | F     | F   | 50 | F     | F   | F     | F   | 77.6  | 6.9  | 50 | F     | F   | F     | F   | 84.4  | 12.9 | 50 | F     | F    | F     | F    | 92.7  | 4.5  |
| Flumetsulam          | 50 | F     | F    | F     | F   | 84.8  | 2.4 | 20 | F     | F   | 42.5  | 3.7 | 60.7  | 1.8  | 20 | F     | F   | 75.9  | 3.5 | 86.1  | 8.7  | 20 | F     | F    | 86.0  | 61.6 | 90.7  | 6.7  |
| Flumiclorac-pentyl   | 5  | 112.4 | 3.3  | 108.4 | 3.9 | 99.1  | 3.1 | 1  | 119.0 | 2.1 | 117.4 | 2.6 | 99.6  | 5.4  | 1  | 120.8 | 4.4 | 109.1 | 0.6 | 98.5  | 1.0  | 5  | 117.1 | 3.4  | 110.3 | 2.7  | 100.2 | 3.7  |
| Flumioxazin          | 5  | 78.7  | 13.1 | 111.3 | 8.1 | 108.8 | 4.5 | 50 | F     | F   | F     | F   | 114.5 | 2.9  | 10 | F     | F   | 133.5 | 7.6 | 121.7 | 4.9  | 20 | F     | F    | 111.6 | 2.6  | 106.3 | 1.8  |
| Flumorph             | 1  | 106.0 | 0.7  | 98.5  | 3.9 | 92.4  | 1.7 | 1  | 115.9 | 3.4 | 106.2 | 1.4 | 106.0 | 2.8  | 1  | 113.9 | 1.1 | 104.2 | 3.7 | 101.7 | 5.6  | 1  | 111.7 | 3.2  | 103.2 | 7.5  | 100.5 | 1.5  |
| Fluopicolide         | 5  | 119.3 | 3.1  | 112.2 | 4.7 | 98.4  | 2.6 | 1  | 126.3 | 2.2 | 123.0 | 1.5 | 113.1 | 2.1  | 1  | 125.9 | 3.9 | 116.0 | 4.3 | 111.0 | 2.8  | 1  | 110.5 | 3.1  | 116.1 | 1.9  | 108.0 | 5.3  |
| Fluopyram            | 5  | 106.5 | 2.0  | 101.5 | 8.0 | 97.2  | 0.5 | 1  | 103.0 | 4.4 | 110.6 | 0.5 | 103.5 | 1.7  | 5  | 110.4 | 1.4 | 102.7 | 4.9 | 107.6 | 16.5 | 5  | 111.7 | 11.9 | 110.2 | 1.1  | 99.8  | 5.1  |
| Fluoroglycofen-ethyl | 1  | 107.6 | 7.3  | 106.5 | 3.6 | 101.3 | 5.2 | 1  | 117.4 | 1.3 | 114.5 | 4.2 | 103.2 | 2.7  | 1  | 111.4 | 7.1 | 107.8 | 2.0 | 98.1  | 4.9  | 1  | 107.0 | 1.8  | 99.1  | 5.4  | 93.4  | 4.2  |
| Fluroxypyr           | NA | F     | F    | F     | F   | F     | F   | 5  | F     | F   | F     | F   | F     | F    | NA | F     | F   | F     | F   | F     | F    | 50 | F     | F    | F     | F    | 20.9  | 82.2 |
| Flurtamone           | 5  | 113.6 | 1.8  | 113.0 | 0.8 | 107.9 | 1.3 | 1  | 118.0 | 3.7 | 117.1 | 2.0 | 110.5 | 2.5  | 1  | 112.1 | 2.1 | 109.5 | 3.7 | 106.0 | 1.4  | 1  | 109.3 | 3.7  | 112.7 | 1.8  | 108.6 | 2.8  |
| Flusilazole          | 1  | 110.2 | 0.6  | 104.2 | 2.2 | 95.3  | 2.1 | 5  | 112.3 | 3.2 | 110.2 | 0.8 | 98.8  | 3.0  | 5  | 111.1 | 6.3 | 104.6 | 1.7 | 99.4  | 2.9  | 5  | 96.4  | 1.4  | 96.2  | 4.7  | 91.0  | 0.8  |
| Fluthiacet-methyl    | 5  | 103.3 | 3.3  | 108.9 | 2.7 | 100.0 | 3.3 | 5  | 109.1 | 3.4 | 107.2 | 3.6 | 76.7  | 23.0 | 5  | 114.0 | 3.6 | 104.3 | 0.8 | 102.7 | 2.5  | 5  | 112.8 | 7.4  | 106.9 | 3.9  | 101.2 | 1.5  |
| Flutolanil           | 1  | 113.3 | 2.2  | 110.2 | 2.2 | 101.5 | 1.2 | 1  | 119.8 | 0.8 | 118.1 | 1.0 | 112.5 | 1.9  | 1  | 118.4 | 1.8 | 110.6 | 3.9 | 108.6 | 0.6  | 1  | 110.6 | 3.3  | 115.8 | 0.8  | 109.7 | 0.5  |
| Flutriafol           | 5  | 98.6  | 5.4  | 97.4  | 4.2 | 95.4  | 5.0 | 5  | 102.9 | 2.9 | 98.7  | 4.2 | 98.3  | 3.5  | 1  | 104.5 | 5.1 | 98.6  | 1.1 | 99.4  | 0.6  | 5  | 91.4  | 4.4  | 87.2  | 2.8  | 88.8  | 1.0  |

|                     |    |       |      |       |      |       |     |    |       |      |       |      |       |       |    |       |      |       |      |       |     |    |       |     |       |      |       |      |
|---------------------|----|-------|------|-------|------|-------|-----|----|-------|------|-------|------|-------|-------|----|-------|------|-------|------|-------|-----|----|-------|-----|-------|------|-------|------|
|                     |    |       |      | 2     |      |       |     |    | .2    |      |       |      |       |       |    | .6    |      |       |      |       |     |    | 6     |     | 4     |      |       |      |
| Fluxapyroxad        | 1  | 111.3 | 2.6  | 107.2 | 4.3  | 94.9  | 4.0 | 1  | 117.9 | 1.1  | 113.9 | 3.0  | 104.4 | 2.3   | 1  | 120.4 | 1.8  | 112.3 | 1.2  | 103.5 | 3.0 | 1  | 108.5 | 5.0 | 102.9 | 1.1  | 96.4  | 0.7  |
| Fomesafen           | 1  | 79.7  | 4.9  | 86.8  | 1.3  | 94.2  | 6.9 | 1  | 48.6  | 3.7  | 57.9  | 14.8 | 81.2  | 2.4   | 5  | 50.1  | 62.5 | 74.9  | 11.5 | 97.4  | 7.7 | 5  | 72.8  | 3.9 | 69.7  | 15.0 | 84.2  | 3.3  |
| Fonophos            | 5  | 93.5  | 13.7 | 91.3  | 9.8  | 94.1  | 8.1 | 5  | 88.1  | 1.9  | 92.8  | 5.1  | 113.4 | 11.3  | 5  | 90.9  | 11.0 | 96.5  | 5.3  | 97.4  | 5.9 | 5  | 88.6  | 6.5 | 83.6  | 7.9  | 83.8  | 13.3 |
| Forchlorfenuron     | 5  | 103.6 | 1.0  | 108.2 | 1.4  | 95.0  | 4.3 | 1  | 107.5 | 1.2  | 103.3 | 3.1  | 97.2  | 0.8   | 1  | 109.1 | 3.2  | 102.0 | 1.9  | 97.8  | 1.6 | 1  | 92.4  | 2.0 | 90.1  | 3.0  | 88.9  | 2.5  |
| Fosthiazate         | 1  | 106.2 | 3.1  | 109.1 | 0.5  | 102.2 | 3.1 | 1  | 101.5 | 5.0  | 106.8 | 1.4  | 105.5 | 1.0   | 1  | 106.4 | 2.9  | 104.1 | 4.7  | 104.4 | 2.7 | 1  | 101.4 | 2.1 | 105.4 | 0.9  | 100.2 | 1.5  |
| Halosulfuron-methyl | 50 | F     | F    | F     | F    | 76.6  | 1.3 | 20 | F     | F    | 56.5  | 7.4  | 72.0  | 2.8   | 50 | F     | F    | F     | F    | 86.1  | 8.6 | 1  | 58.0  | 4.2 | 70.2  | 4.6  | 78.7  | 3.9  |
| Haloxypop-methyl    | 1  | 105.3 | 1.9  | 104.8 | 1.4  | 92.6  | 3.8 | 1  | 115.2 | 4.1  | 112.2 | 3.4  | 103.8 | 2.9   | 1  | 114.0 | 4.1  | 108.5 | 4.9  | 104.1 | 1.7 | 1  | 109.0 | 2.8 | 109.9 | 1.3  | 102.5 | 0.8  |
| Hexaconazole        | 5  | 90.5  | 6.0  | 92.3  | 3.6  | 89.4  | 0.7 | 5  | 86.7  | 1.6  | 90.3  | 3.7  | 95.2  | 0.9   | 5  | 84.5  | 2.3  | 88.9  | 1.4  | 91.1  | 2.6 | 5  | 82.1  | 3.9 | 84.8  | 2.3  | 86.9  | 3.5  |
| Hexaflumuron        | 5  | 98.4  | 6.5  | 117.6 | 3.4  | 104.9 | 4.5 | 5  | 182.1 | 9.1  | 132.8 | 4.0  | 120.5 | 2.2   | 5  | 139.3 | 10.2 | 129.6 | 3.5  | 106.4 | 6.4 | 50 | F     | F   | F     | F    | 106.3 | 3.7  |
| Hexanoic acid       | 10 | F     | F    | 113.9 | 17.3 | 102.8 | 3.6 | 5  | 107.2 | 97.8 | 140.8 | 27.1 | 121.2 | 5.3   | 50 | F     | F    | F     | F    | 107.5 | 5.2 | 50 | F     | F   | F     | F    | 102.9 | 11.4 |
| Hexazinone          | 1  | 105.4 | 4.4  | 106.9 | 2.7  | 107.7 | 3.3 | 1  | 118.2 | 3.7  | 111.4 | 2.4  | 99.6  | 1.5   | 1  | 115.8 | 1.1  | 109.0 | 0.4  | 99.8  | 2.9 | 1  | 103.7 | 1.6 | 102.4 | 0.5  | 89.5  | 1.3  |
| Hexythiazox         | 5  | 113.4 | 8.7  | 88.6  | 36.7 | 99.3  | 0.9 | 5  | 137.8 | 6.8  | 107.0 | 6.2  | 105.1 | 109.3 | 5  | 103.6 | 15.5 | 98.7  | 7.1  | 83.4  | 2.6 | 1  | 121.6 | 4.9 | 105.6 | 7.9  | 91.2  | 4.3  |
| Hymexazol           | 5  | 107.  | 9.2  | 103   | 3.8  | 94.3  | 3.1 | 5  | 116   | 0.6  | 106.  | 4.6  | 106.  | 3.4   | 5  | 115   | 1.4  | 103.  | 1.7  | 99.0  | 3.0 | 5  | 111   | 13. | 90.   | 6.4  | 94.0  | 3.0  |







|                     |     |       |     |       |      |       |     |    |       |      |       |      |       |     |    |       |     |       |     |       |      |    |       |      |       |     |       |     |
|---------------------|-----|-------|-----|-------|------|-------|-----|----|-------|------|-------|------|-------|-----|----|-------|-----|-------|-----|-------|------|----|-------|------|-------|-----|-------|-----|
| Malathion           | 1   | 109.3 | 1.5 | 110.5 | 4.6  | 104.3 | 2.2 | 1  | 105.4 | 4.2  | 98.8  | 2.4  | 96.2  | 1.6 | 1  | 98.6  | 9.0 | 103.5 | 7.8 | 103.5 | 7.4  | 1  | 97.0  | 1.5  | 108.1 | 0.6 | 103.5 | 2.2 |
| Maleic Hydrazide    | 50  | F     | F   | F     | F    | F     | F   | 1  | F     | F    | F     | F    | F     | F   | 20 | F     | F   | F     | F   | F     | F    | 50 | F     | F    | F     | F   | F     | F   |
| Mandipropamid       | 5   | 112.1 | 1.1 | 103.2 | 5.2  | 94.5  | 1.4 | 1  | 108.4 | 2.3  | 108.6 | 0.4  | 102.7 | 0.8 | 1  | 110.8 | 1.0 | 104.6 | 3.5 | 102.4 | 2.3  | 1  | 93.3  | 5.2  | 97.0  | 1.2 | 94.4  | 4.7 |
| Matrine             | 5   | 23.6  | 5.4 | 31.8  | 3.2  | 47.9  | 3.6 | 5  | 17.7  | 2.1  | 17.8  | 5.6  | 34.4  | 2.6 | 5  | F     | F   | F     | F   | 39.0  | 4.6  | 5  | 30.7  | 3.6  | 31.8  | 1.4 | 36.6  | 2.3 |
| Mefenacet           | 1   | 99.3  | 2.8 | 88.9  | 10.0 | 89.0  | 3.7 | 1  | 90.5  | 5.9  | 99.8  | 3.0  | 98.5  | F   | 1  | 102.9 | 3.4 | 97.0  | 3.0 | 100.1 | 16.2 | 1  | 103.9 | 13.4 | 91.4  | 5.4 | 88.1  | 1.0 |
| Mepronil            | 1   | 117.8 | 2.3 | 110.6 | 2.9  | 100.1 | 2.4 | 1  | 117.2 | 1.8  | 113.2 | 3.0  | 104.1 | 1.3 | 1  | 118.0 | 0.9 | 110.7 | 2.6 | 103.6 | 3.2  | 1  | 103.0 | 3.3  | 101.9 | 3.0 | 94.3  | 0.9 |
| Mesosulfuron-methyl | 10  | F     | F   | 84.3  | 2.3  | 84.7  | 4.0 | 5  | 51.0  | 5.8  | 57.4  | 4.2  | 69.6  | 3.8 | 5  | 83.0  | 1.0 | 82.9  | 6.1 | 93.7  | 2.3  | 5  | 76.3  | 4.1  | 78.2  | 3.2 | 85.6  | 6.2 |
| Mesotrione          | 100 | F     | F   | F     | F    | F     | F   | 50 | F     | F    | F     | F    | 31.6  | 0.8 | 50 | F     | F   | F     | F   | 29.8  | 23.1 | 20 | F     | F    | 9.6   | 4.5 | 21.8  | 8.4 |
| Metaflumizone       | 20  | F     | F   | 90.5  | 10.0 | 86.5  | 2.4 | 5  | 104.6 | 10.9 | 100.3 | 0.9  | 93.9  | 2.7 | 5  | 86.5  | 6.8 | 98.8  | 7.9 | 90.6  | 6.4  | 5  | 88.6  | 4.9  | 94.3  | 9.8 | 85.6  | 1.7 |
| Metalaxyl-M         | 5   | 110.7 | 6.3 | 118.6 | 0.9  | 101.9 | 1.7 | 1  | 123.6 | 3.1  | 117.0 | 0.9  | 107.6 | 3.7 | 1  | 115.7 | 3.1 | 113.4 | 2.3 | 110.0 | 1.2  | 1  | 109.2 | 3.4  | 109.4 | 1.6 | 97.5  | 1.7 |
| Metaldehyde         | NA  | F     | F   | F     | F    | F     | F   | NA | F     | F    | F     | F    | F     | F   | NA | F     | F   | F     | F   | F     | F    | NA | F     | F    | F     | F   | F     | F   |
| Metamifop           | 1   | 106.7 | 3.0 | 107.2 | 4.8  | 100.6 | 1.5 | 1  | 112.8 | 7.2  | 110.5 | 1.7  | 101.7 | 2.1 | 1  | 109.6 | 5.3 | 101.3 | 3.0 | 95.3  | 1.3  | 1  | 106.5 | 2.8  | 98.5  | 3.6 | 95.3  | 1.1 |
| Metazachlor         | 1   | 114.0 | 2.6 | 110.7 | 1.1  | 103.2 | 2.7 | 1  | 112.1 | 2.2  | 114.2 | 2.3  | 106.9 | 3.7 | 1  | 111.8 | 3.2 | 110.9 | 4.4 | 106.1 | 2.1  | 1  | 103.5 | 0.9  | 109.9 | 2.3 | 101.1 | 1.3 |
| Metazosulfuron      | 50  | F     | F   | F     | F    | 63.7  | 0.5 | 5  | 23.4  | 7.6  | 37.6  | 11.9 | 62.7  | 1.9 | 20 | F     | F   | 44.2  | 3.7 | 70.0  | 14.7 | 50 | F     | F    | F     | F   | 62.5  | 7.1 |

|                      |   |       |     |       |     |       |      |    |       |     |       |     |       |     |   |       |     |       |     |       |      |    |       |      |       |     |       |      |
|----------------------|---|-------|-----|-------|-----|-------|------|----|-------|-----|-------|-----|-------|-----|---|-------|-----|-------|-----|-------|------|----|-------|------|-------|-----|-------|------|
| Methamidophos        | 1 | F     | F   | F     | F   | F     | F    | 1  | 65.5  | 2.3 | 64.3  | 1.6 | 66.5  | 2.5 | 1 | 69.2  | 0.9 | 65.6  | 2.5 | 68.1  | 4.8  | 1  | 73.5  | 19.5 | 70.4  | 7.4 | 83.0  | 18.6 |
| Methidathion         | 1 | 98.9  | 4.9 | 95.5  | 1.6 | 91.7  | 2.5  | 1  | 104.6 | 3.5 | 98.8  | 5.1 | 99.7  | 2.0 | 1 | 108.3 | 4.0 | 104.3 | 2.0 | 100.6 | 5.7  | 1  | 91.3  | 2.3  | 89.5  | 4.6 | 93.1  | 4.4  |
| Methiocarb sulfone   | 1 | 121.6 | 5.9 | 115.0 | 2.7 | 97.3  | 2.2  | 5  | 123.7 | 1.9 | 119.8 | 2.0 | 101.3 | 2.6 | 1 | 121.3 | 2.4 | 117.2 | 1.2 | 106.9 | 1.7  | 5  | 101.7 | 4.7  | 103.7 | 5.0 | 90.6  | 2.1  |
| Methiocarb sulfoxide | 1 | 105.8 | 3.8 | 103.7 | 3.6 | 93.1  | 1.3  | 1  | 115.7 | 3.6 | 109.3 | 1.3 | 101.5 | 3.1 | 1 | 109.2 | 0.6 | 99.1  | 1.6 | 95.7  | 1.3  | 1  | 97.8  | 2.7  | 98.5  | 3.3 | 88.8  | 3.0  |
| Methiocarb           | 1 | 116.1 | 4.1 | 111.0 | 1.7 | 102.0 | 2.0  | 1  | 124.8 | 1.4 | 119.8 | 0.7 | 105.2 | 1.3 | 1 | 119.9 | 6.0 | 111.9 | 1.9 | 101.3 | 1.6  | 1  | 107.9 | 1.7  | 107.6 | 5.4 | 99.5  | 2.0  |
| Methomyl             | 5 | 128.8 | 1.6 | 124.4 | 3.6 | 100.3 | 3.0  | 10 | F     | F   | 129.2 | 2.1 | 103.5 | 3.8 | 5 | 132.8 | 1.7 | 118.7 | 1.6 | 100.5 | 3.7  | 10 | F     | F    | 107.4 | 0.7 | 91.3  | 1.5  |
| Methoxyfenozide      | 5 | 93.2  | 3.9 | 97.3  | 0.5 | 89.4  | 3.6  | 1  | 106.0 | 4.2 | 107.2 | 4.6 | 104.9 | 3.5 | 1 | 102.2 | 0.6 | 102.8 | 2.4 | 99.4  | 2.6  | 1  | 99.3  | 3.2  | 101.3 | 1.7 | 94.3  | 2.1  |
| Metolachlor          | 1 | 113.0 | 4.7 | 106.5 | 3.8 | 94.8  | 2.3  | 1  | 129.2 | 2.5 | 120.1 | 0.5 | 107.7 | 1.5 | 1 | 116.6 | 0.5 | 113.2 | 1.8 | 104.9 | 1.9  | 1  | 115.1 | 0.9  | 103.9 | 4.3 | 96.7  | 3.6  |
| Metrafenone          | 5 | 103.9 | 0.6 | 108.9 | 1.5 | 101.0 | 4.6  | 1  | 112.4 | 1.5 | 109.5 | 2.3 | 107.1 | 2.2 | 1 | 110.5 | 2.0 | 109.0 | 4.8 | 104.1 | 4.5  | 1  | 113.8 | 3.0  | 114.8 | 0.2 | 105.4 | 2.2  |
| Metribuzin           | 5 | 108.2 | 3.4 | 106.6 | 5.1 | 98.0  | 3.4  | 1  | 105.0 | 2.0 | 98.8  | 4.9 | 98.5  | 2.6 | 1 | 111.6 | 4.1 | 105.4 | 4.2 | 101.6 | 1.8  | 5  | 100.9 | 7.9  | 94.8  | 0.1 | 89.9  | 3.1  |
| Metsulfuron-methyl   | 5 | 61.4  | 7.0 | 64.9  | 2.1 | 72.9  | 6.5  | 5  | 23.4  | 7.3 | 31.0  | 5.6 | 55.0  | 4.5 | 5 | 46.2  | 2.2 | 52.8  | 4.6 | 69.4  | 5.5  | 5  | 71.1  | 1.1  | 70.4  | 3.3 | 78.9  | 3.7  |
| Molinate             | 5 | 108.4 | 7.3 | 97.8  | 1.1 | 91.2  | 2.5  | 5  | 103.7 | 3.9 | 101.1 | 4.8 | 96.4  | 1.0 | 5 | 100.6 | 2.1 | 95.5  | 2.6 | 95.0  | 4.5  | 5  | 88.4  | 2.2  | 93.5  | 1.9 | 89.2  | 1.5  |
| Monocrotophos        | 1 | 110.8 | 2.2 | 105.9 | 3.0 | 83.4  | 13.1 | 1  | 113.6 | 3.7 | 107.5 | 2.1 | 95.3  | 1.9 | 1 | 114.0 | 0.9 | 103.6 | 1.2 | 89.8  | 10.8 | 1  | 96.6  | 1.4  | 94.2  | 2.5 | 78.0  | 14.9 |

|                         |    |       |     |       |     |       |      |    |       |      |       |      |       |      |    |       |     |       |      |       |      |    |       |     |       |     |       |      |
|-------------------------|----|-------|-----|-------|-----|-------|------|----|-------|------|-------|------|-------|------|----|-------|-----|-------|------|-------|------|----|-------|-----|-------|-----|-------|------|
| Monosulfuron            | 20 | F     | F   | 57.9  | 5.7 | 60.9  | 4.2  | 10 | F     | F    | 21.9  | 11.7 | 42.0  | 3.9  | 50 | F     | F   | F     | F    | 53.4  | 12.8 | 20 | F     | F   | 65.2  | 4.2 | 68.5  | 6.0  |
| Moroxydinehydrochloride | 1  | 9.3   | 9.5 | 11.5  | 2.0 | 16.9  | 4.2  | 1  | 9.2   | 5.9  | 11.5  | 4.7  | 15.4  | 4.9  | 1  | 11.1  | 5.1 | 12.2  | 3.8  | 15.7  | 14.0 | 1  | 11.7  | 7.1 | 12.3  | 2.6 | 15.5  | 2.6  |
| Myclobutanil            | 5  | 121.8 | 2.5 | 99.4  | 2.0 | 92.5  | 5.1  | 1  | 97.7  | 3.8  | 98.1  | 2.6  | 93.8  | 1.5  | 5  | 102.9 | 4.7 | 97.8  | 0.7  | 95.6  | 1.3  | 5  | 90.7  | 3.0 | 95.1  | 3.1 | 91.8  | 2.5  |
| Napropamide             | 1  | 114.2 | 0.9 | 109.0 | 0.5 | 100.5 | 2.0  | 1  | 118.5 | 5.1  | 114.6 | 2.3  | 106.6 | 2.2  | 1  | 118.0 | 3.6 | 111.6 | 1.1  | 109.9 | 3.9  | 1  | 107.6 | 3.2 | 100.7 | 3.9 | 98.1  | 3.1  |
| NicosulFuron            | 10 | F     | F   | 41.4  | 1.8 | 49.2  | 4.9  | 5  | 7.0   | 8.3  | 11.6  | 1.2  | 26.2  | 4.2  | 5  | 26.2  | 5.3 | 28.8  | 4.5  | 41.2  | 11.4 | 5  | 54.4  | 7.1 | 48.0  | 3.5 | 57.2  | 3.8  |
| Nicotine                | 1  | 128.9 | 7.4 | 103.4 | 6.4 | 46.8  | 25.9 | 1  | 130.8 | 14.0 | 91.4  | 24.9 | 131.7 | 3.4  | 1  | 129.4 | 7.1 | 179.7 | 19.5 | 149.8 | 9.5  | 1  | 129.5 | 8.5 | 77.1  | 6.5 | 46.8  | 2.0  |
| Novaluron               | 5  | 126.5 | 6.1 | 128.7 | 3.7 | 114.0 | 1.1  | 1  | 150.2 | 4.0  | 136.4 | 1.3  | 116.1 | 4.0  | 5  | 143.9 | 1.4 | 128.9 | 6.9  | 112.5 | 10.4 | 5  | 136.7 | 7.3 | 128.1 | 2.0 | 113.5 | 4.4  |
| Dimethoate oxon         | 1  | 112.7 | 1.1 | 111.3 | 0.4 | 96.6  | 3.0  | 1  | 116.0 | 5.1  | 115.8 | 1.8  | 110.2 | 2.9  | 1  | 117.5 | 3.9 | 110.5 | 2.0  | 104.2 | 1.7  | 1  | 104.5 | 2.9 | 104.7 | 1.0 | 93.6  | 2.1  |
| OrthosulFamuron         | 20 | F     | F   | 94.3  | 6.7 | 86.4  | 4.0  | 20 | F     | F    | 61.1  | 4.4  | 68.2  | 1.4  | 20 | F     | F   | 84.9  | 0.9  | 89.2  | 1.8  | 20 | F     | F   | 92.7  | 3.3 | 90.8  | 1.8  |
| Oxadiargyl              | 5  | 97.2  | 4.4 | 105.6 | 6.3 | 92.1  | 4.7  | 5  | 111.3 | 4.7  | 83.1  | 19.9 | 87.9  | 10.1 | 50 | F     | F   | F     | F    | 110.2 | 11.4 | 10 | 115.0 | 4.5 | 116.4 | 3.8 | 105.4 | 17.8 |
| Oxadiazon               | 5  | 123.6 | 4.8 | 112.4 | 1.8 | 104.5 | 1.0  | 1  | 121.0 | 5.2  | 120.8 | 3.1  | 113.9 | 3.0  | 1  | 129.4 | 4.2 | 121.4 | 2.1  | 109.5 | 1.5  | 10 | 120.4 | 0.8 | 118.8 | 2.8 | 108.6 | 4.8  |
| Oxadixyl                | 5  | 103.4 | 5.4 | 109.4 | 4.1 | 104.1 | 1.8  | 1  | 122.2 | 3.0  | 118.2 | 2.0  | 114.2 | 4.2  | 1  | 119.9 | 2.6 | 112.4 | 6.7  | 104.9 | 9.5  | 1  | 104.4 | 5.2 | 106.8 | 3.7 | 95.6  | 4.0  |
| Oxamyl                  | 5  | 136.6 | 4.9 | 129.3 | 7.0 | 105.7 | 4.8  | 20 | F     | F    | 129.4 | 4.5  | 112.9 | 1.1  | 20 | F     | F   | 148.8 | 2.8  | 117.8 | 1.8  | 20 | F     | F   | 137.0 | 2.7 | 108.0 | 7.3  |

|                            |    |       |     |       |      |       |      |    |       |     |       |     |       |     |    |       |      |       |      |       |      |    |       |     |       |     |       |     |
|----------------------------|----|-------|-----|-------|------|-------|------|----|-------|-----|-------|-----|-------|-----|----|-------|------|-------|------|-------|------|----|-------|-----|-------|-----|-------|-----|
| Oxaziclomefone             | 1  | 112.8 | 2.5 | 116.4 | 2.1  | 108.7 | 2.2  | 1  | 120.0 | 4.2 | 115.9 | 5.5 | 105.5 | 4.7 | 1  | 107.8 | 16.9 | 109.5 | 3.6  | 104.1 | 0.7  | 1  | 111.8 | 0.9 | 109.3 | 1.3 | 100.9 | 4.5 |
| OxiMinoOxaMyl              | 5  | 117.1 | 2.5 | 113.2 | 1.1  | 103.2 | 0.7  | 20 | F     | F   | 126.2 | 0.5 | 115.6 | 1.5 | 1  | 136.9 | 5.8  | 130.8 | 2.7  | 118.1 | 2.1  | 5  | 113.0 | 0.5 | 114.6 | 2.1 | 102.8 | 3.0 |
| Oxycarboxin                | 20 | F     | F   | 108.8 | 15.3 | 77.7  | 24.8 | 50 | F     | F   | F     | F   | 54.5  | 4.8 | 5  | 96.2  | 37.7 | 125.7 | 12.2 | 105.9 | 78.9 | 10 | F     | F   | 99.6  | 9.8 | 93.1  | 2.8 |
| Oxydemeton-methyl          | 1  | 102.7 | 3.3 | 100.0 | 4.0  | 90.5  | 5.9  | 1  | 110.9 | 2.8 | 99.3  | 4.0 | 97.2  | 1.6 | 1  | 116.6 | 1.4  | 104.4 | 2.5  | 98.1  | 2.5  | 1  | 102.6 | 2.1 | 93.6  | 5.5 | 84.5  | 2.8 |
| Paclobutrazol              | 1  | 99.4  | 4.1 | 103.2 | 2.0  | 99.5  | 2.4  | 1  | 97.6  | 5.4 | 99.6  | 5.2 | 99.2  | 2.7 | 1  | 98.4  | 1.8  | 98.6  | 1.1  | 102.6 | 2.4  | 1  | 96.2  | 2.4 | 98.3  | 1.2 | 97.3  | 1.0 |
| Parathion-methyl           | NA | F     | F   | F     | F    | F     | F    | NA | F     | F   | F     | F   | F     | F   | NA | F     | F    | F     | F    | F     | F    | NA | F     | F   | F     | F   | F     | F   |
| Parathion                  | NA | F     | F   | F     | F    | F     | F    | NA | F     | F   | F     | F   | F     | F   | NA | F     | F    | F     | F    | F     | F    | NA | F     | F   | F     | F   | F     | F   |
| Penconazole                | 1  | 119.0 | 2.6 | 112.3 | 3.8  | 102.0 | 3.7  | 1  | 132.8 | 3.0 | 115.7 | 1.1 | 110.9 | 2.2 | 1  | 121.4 | 0.2  | 111.5 | 3.1  | 103.8 | 2.2  | 1  | 118.7 | 1.0 | 108.9 | 4.2 | 104.0 | 3.4 |
| Pendimethalin              | 5  | 87.7  | 5.5 | 89.0  | 7.0  | 88.5  | 3.5  | 5  | 94.2  | 4.9 | 95.3  | 1.9 | 93.4  | 1.7 | 1  | 94.6  | 3.0  | 92.3  | 3.3  | 92.5  | 0.8  | 1  | 85.4  | 3.2 | 87.1  | 1.2 | 85.5  | 3.4 |
| Penoxsulam                 | 5  | 81.4  | 0.2 | 82.9  | 7.4  | 85.5  | 4.3  | 1  | 44.0  | 7.2 | 50.0  | 3.6 | 64.0  | 1.4 | 1  | 79.4  | 3.0  | 81.0  | 3.5  | 91.9  | 5.5  | 1  | 84.0  | 1.5 | 82.3  | 0.8 | 81.1  | 4.9 |
| Penthiopyrad               | 1  | 128.5 | 4.0 | 126.5 | 1.4  | 113.1 | 1.7  | 1  | 132.6 | 2.3 | 129.1 | 3.1 | 114.9 | 3.9 | 1  | 129.7 | 2.2  | 115.8 | 0.2  | 112.9 | 0.3  | 1  | 122.5 | 4.8 | 125.3 | 1.7 | 110.9 | 1.5 |
| Phenamacril                | 1  | 118.6 | 1.9 | 107.5 | 2.0  | 99.8  | 4.4  | 1  | 125.8 | 3.2 | 110.5 | 5.9 | 104.0 | 1.1 | 1  | 119.9 | 2.0  | 107.3 | 3.5  | 101.8 | 0.8  | 1  | 101.3 | 4.7 | 94.9  | 2.6 | 91.1  | 1.8 |
| Phenazino-1-carboxylicacid | 1  | 96.9  | 3.4 | 91.9  | 2.6  | 87.3  | 5.0  | 1  | 61.4  | 2.5 | 60.7  | 2.7 | 63.4  | 3.8 | 1  | 89.1  | 1.6  | 82.9  | 3.3  | 83.6  | 2.3  | 1  | 95.1  | 1.9 | 85.5  | 5.5 | 85.3  | 1.9 |

|                      |    |       |      |       |      |       |      |        |       |      |       |      |       |     |   |       |      |       |      |       |     |   |       |      |       |      |       |     |
|----------------------|----|-------|------|-------|------|-------|------|--------|-------|------|-------|------|-------|-----|---|-------|------|-------|------|-------|-----|---|-------|------|-------|------|-------|-----|
| Phenmedipham         | 5  | 121.0 | 4.4  | 112.1 | 3.0  | 98.1  | 3.1  | 1      | 127.6 | 6.7  | 108.2 | 1.1  | 102.9 | 1.9 | 5 | 119.4 | 0.8  | 111.4 | 1.3  | 104.5 | 1.7 | 5 | 102.1 | 3.7  | 92.1  | 5.3  | 96.1  | 6.0 |
| Phenthoate           | 5  | 146.3 | 3.6  | 146.4 | 2.4  | 127.2 | 1.5  | 1      | 157.3 | 5.7  | 139.7 | 9.8  | 127.8 | 9.0 | 1 | 152.0 | 5.5  | 136.5 | 5.0  | 124.4 | 3.1 | 5 | 136.1 | 1.8  | 137.1 | 3.2  | 123.1 | 3.3 |
| Phorate oxon sulfone | 1  | F     | F    | F     | F    | F     | F    | N<br>A | F     | F    | F     | F    | F     | F   | 1 | F     | F    | F     | F    | F     | F   | 1 | F     | F    | F     | F    | 86.5  | F   |
| Phorate oxon sulfone | 5  | 119.3 | 9.3  | 109.6 | 5.2  | 101.0 | 2.3  | 1      | 128.2 | 3.5  | 114.9 | 1.2  | 111.6 | 2.2 | 1 | 127.7 | 3.1  | 115.8 | 1.6  | 103.5 | 1.2 | 1 | 117.8 | 0.5  | 102.6 | 2.4  | 89.4  | 6.6 |
| Phorate oxon         | 5  | 78.9  | 34.8 | 92.7  | 11.5 | 106.7 | 4.0  | 5      | 71.3  | 14.0 | 94.7  | 19.8 | 90.4  | 7.0 | 5 | 80.5  | 13.6 | 96.5  | 22.6 | 108.5 | 6.3 | 5 | 62.0  | 12.2 | 94.0  | 11.7 | 85.2  | 3.4 |
| Phorate sulfone      | 1  | 122.2 | 6.0  | 114.3 | 2.7  | 101.4 | 1.0  | 1      | 130.5 | 3.1  | 123.8 | 1.0  | 104.2 | 1.8 | 1 | 129.8 | 2.1  | 120.3 | 2.7  | 105.8 | 0.4 | 1 | 108.7 | 1.6  | 113.5 | 3.0  | 97.6  | 2.5 |
| Phorate sulfoxide    | 1  | 124.0 | 5.2  | 115.3 | 2.9  | 101.1 | 2.5  | 1      | 124.7 | 3.2  | 117.5 | 2.0  | 106.1 | 2.0 | 1 | 123.4 | 2.2  | 115.6 | 0.8  | 107.1 | 1.2 | 1 | 112.5 | 2.2  | 111.3 | 3.2  | 96.1  | 1.7 |
| Phorate              | 10 | F     | F    | 62.4  | 14.9 | 85.2  | 11.5 | 5      | 55.4  | 22.3 | 82.9  | 4.1  | 94.9  | 0.7 | 5 | 65.4  | 29.9 | 83.4  | 6.5  | 105.1 | 7.2 | 5 | 51.1  | 1.7  | 76.0  | 2.6  | 85.0  | 4.2 |
| Phosalone            | 5  | 105.7 | 0.5  | 109.8 | 1.6  | 103.6 | 3.2  | 1      | 119.3 | 3.4  | 118.6 | 4.8  | 110.9 | 3.8 | 1 | 120.7 | 2.6  | 114.6 | 1.9  | 109.3 | 5.0 | 5 | 105.2 | 3.7  | 104.8 | 1.1  | 101.8 | 2.6 |
| Phosfolan-methyl     | 1  | 110.9 | 3.9  | 104.3 | 4.1  | 94.7  | 5.0  | 1      | 116.2 | 3.6  | 105.2 | 6.3  | 96.7  | 1.5 | 1 | 115.6 | 2.6  | 109.5 | 2.4  | 102.8 | 3.3 | 1 | 100.5 | 3.1  | 92.5  | 2.3  | 86.4  | 2.5 |
| Phosfolan            | 1  | 112.9 | 6.5  | 106.8 | 4.1  | 97.5  | 7.1  | 1      | 112.2 | 1.4  | 104.3 | 3.2  | 103.3 | 2.3 | 1 | 119.6 | 0.7  | 110.0 | 2.1  | 101.3 | 1.3 | 1 | 102.2 | 2.4  | 94.3  | 2.2  | 89.2  | 3.3 |
| Phosmet              | 1  | 128.9 | 1.4  | 128.6 | 1.4  | 110.6 | 2.5  | 1      | 142.9 | 4.9  | 130.6 | 4.8  | 113.6 | 1.6 | 1 | 141.6 | 2.6  | 129.6 | 4.5  | 118.4 | 2.2 | 1 | 117.8 | 0.9  | 119.7 | 1.4  | 111.3 | 1.9 |
| Phosphamidon         | 1  | 100.1 | 5.1  | 100.3 | 3.7  | 94.8  | 2.1  | 1      | 112.2 | 3.2  | 111.2 | 1.2  | 104.0 | 1.3 | 1 | 104.5 | 3.2  | 100.3 | 3.0  | 95.9  | 3.4 | 1 | 98.9  | 5.1  | 98.5  | 7.3  | 89.2  | 4.0 |

|                    |    |       |      |       |      |       |     |    |       |     |       |      |       |     |    |       |      |       |     |       |     |    |       |     |       |     |       |     |
|--------------------|----|-------|------|-------|------|-------|-----|----|-------|-----|-------|------|-------|-----|----|-------|------|-------|-----|-------|-----|----|-------|-----|-------|-----|-------|-----|
| Phoxim             | 5  | 94.8  | 4.2  | 91.4  | 5.0  | 91.2  | 5.2 | 5  | 100.1 | 1.3 | 96.7  | 5.4  | 98.8  | 3.9 | 5  | 104.7 | 1.6  | 97.6  | 2.3 | 96.8  | 4.7 | 5  | 93.2  | 1.6 | 89.9  | 3.5 | 91.2  | 3.4 |
| Phthalide          | 1  | 155.0 | 21.9 | 139.6 | 10.5 | 104.8 | 2.0 | 5  | 156.3 | 3.0 | 116.8 | 4.1  | 101.1 | 1.2 | 1  | 115.5 | 4.9  | 122.4 | 3.1 | 106.6 | 1.7 | 1  | 114.9 | 7.0 | 125.0 | 5.8 | 101.4 | 1.1 |
| Picoxystrobin      | 1  | 101.7 | 1.7  | 113.2 | 2.6  | 105.4 | 3.3 | 1  | 102.0 | 5.9 | 109.6 | 5.5  | 108.9 | 3.4 | 1  | 103.9 | 6.3  | 104.6 | 1.5 | 107.8 | 2.5 | 1  | 100.3 | 4.4 | 112.6 | 1.8 | 110.1 | 6.0 |
| Pinoxaden          | 1  | 89.5  | 3.3  | 86.9  | 2.4  | 89.8  | 4.1 | 1  | 94.3  | 4.6 | 92.9  | 5.0  | 98.1  | 1.0 | 1  | 101.4 | 2.9  | 100.1 | 3.3 | 102.8 | 0.6 | 1  | 94.8  | 0.3 | 96.0  | 0.7 | 95.6  | 3.8 |
| Piperonyl butoxide | 1  | 115.4 | 7.2  | 106.6 | 2.0  | 96.7  | 2.4 | 1  | 108.5 | 1.6 | 106.1 | 2.2  | 98.2  | 1.6 | 1  | 114.3 | 0.8  | 105.3 | 0.3 | 97.2  | 0.2 | 1  | 101.6 | 1.9 | 101.0 | 2.8 | 95.9  | 3.3 |
| Pirimicarb         | 1  | 112.7 | 0.6  | 101.9 | 2.2  | 95.3  | 5.8 | 1  | 110.1 | 2.1 | 101.4 | 3.2  | 100.8 | 3.0 | 1  | 108.9 | 4.1  | 98.7  | 2.7 | 96.8  | 2.9 | 1  | 103.7 | 1.3 | 95.3  | 1.2 | 87.4  | 2.3 |
| Pirimiphos-methyl  | 1  | 105.0 | 1.6  | 106.7 | 2.6  | 101.0 | 1.1 | 1  | 98.4  | 5.2 | 104.3 | 3.4  | 103.2 | 1.2 | 1  | 107.6 | 2.2  | 105.6 | 1.5 | 106.3 | 2.1 | 1  | 100.1 | 1.3 | 106.2 | 1.8 | 103.1 | 2.6 |
| Pretilachlor       | 5  | 98.0  | 1.9  | 98.8  | 1.8  | 90.4  | 2.9 | 1  | 115.5 | 1.4 | 111.6 | 1.2  | 105.1 | 2.4 | 5  | 110.2 | 3.6  | 104.1 | 4.5 | 101.3 | 3.1 | 5  | 107.1 | 0.4 | 110.3 | 1.6 | 104.3 | 3.4 |
| Probenazole        | 5  | 107.0 | 2.3  | 99.7  | 1.8  | 96.8  | 4.4 | 5  | 86.9  | 3.6 | 84.3  | 3.7  | 91.0  | 5.2 | 5  | 98.6  | 2.8  | 92.7  | 1.7 | 93.0  | 1.7 | 5  | 93.8  | 3.6 | 91.2  | 2.2 | 88.4  | 5.1 |
| Prochloraz         | 1  | 95.1  | 7.1  | 93.4  | 3.8  | 90.5  | 1.7 | 1  | 98.6  | 3.2 | 99.7  | 1.6  | 98.6  | 1.8 | 1  | 102.7 | 2.3  | 100.3 | 1.0 | 95.1  | 1.7 | 1  | 91.2  | 3.0 | 92.7  | 2.0 | 90.0  | 1.9 |
| Profenophos        | 1  | 113.3 | 1.4  | 118.2 | 2.4  | 106.3 | 1.9 | 1  | 123.4 | 3.3 | 111.5 | 11.8 | 110.5 | 3.8 | 1  | 109.8 | 13.1 | 114.1 | 5.5 | 108.0 | 1.9 | 1  | 116.5 | 1.2 | 113.8 | 1.0 | 107.3 | 1.8 |
| Prohexadione       | NA | F     | F    | F     | F    | F     | F   | NA | F     | F   | F     | F    | F     | F   | NA | F     | F    | F     | F   | F     | F   | NA | F     | F   | F     | F   | F     | F   |
| Prometryn          | 1  | 105.3 | 6.2  | 104.0 | 1.1  | 94.7  | 0.8 | 1  | 102.5 | 4.1 | 100.1 | 5.0  | 99.1  | 1.5 | 1  | 107.8 | 1.4  | 100.6 | 0.7 | 97.9  | 1.6 | 1  | 98.0  | 3.3 | 96.5  | 3.1 | 92.0  | 2.5 |

|                  |    |       |     |       |     |       |     |    |       |     |       |     |       |     |    |       |     |       |     |       |     |        |       |     |       |     |       |     |
|------------------|----|-------|-----|-------|-----|-------|-----|----|-------|-----|-------|-----|-------|-----|----|-------|-----|-------|-----|-------|-----|--------|-------|-----|-------|-----|-------|-----|
| Propachlor       | 1  | 121.8 | 1.4 | 120.3 | 1.3 | 109.2 | 1.4 | 1  | 120.8 | 4.0 | 119.7 | 2.0 | 109.2 | 1.8 | 1  | 121.4 | 2.4 | 114.2 | 2.7 | 108.6 | 1.7 | 1      | 114.2 | 3.4 | 117.3 | 2.3 | 105.3 | 1.8 |
| Propamocarb      | 1  | 92.0  | 0.1 | 84.8  | 2.0 | 80.0  | 5.2 | 1  | 90.3  | 5.9 | 82.5  | 2.6 | 88.3  | 3.6 | 1  | 92.0  | 4.5 | 86.1  | 2.4 | 86.5  | 1.1 | 1      | 77.0  | 1.6 | 72.6  | 1.9 | 72.0  | 2.2 |
| Propanil         | 50 | F     | F   | F     | F   | 101.4 | 2.5 | 20 | F     | F   | 128.7 | 3.6 | 122.5 | 4.1 | 50 | F     | F   | F     | F   | 125.8 | 4.9 | 20     | F     | F   | 119.5 | 1.5 | 111.7 | 3.5 |
| Propargite       | 1  | 106.8 | 5.1 | 106.3 | 3.5 | 96.4  | 1.7 | 1  | 120.6 | 2.9 | 113.2 | 2.2 | 100.3 | 2.9 | 1  | 106.9 | 1.0 | 103.1 | 0.3 | 93.8  | 2.1 | 1      | 109.3 | 2.6 | 102.9 | 3.9 | 95.2  | 1.3 |
| Propiconazole    | 1  | 99.2  | 1.8 | 103.7 | 1.6 | 95.1  | 4.9 | 1  | 105.0 | 2.3 | 112.1 | 1.3 | 107.8 | 5.1 | 1  | 108.0 | 3.7 | 99.1  | 2.6 | 98.2  | 4.1 | 1      | 106.3 | 5.9 | 94.5  | 1.4 | 93.4  | 3.7 |
| Propisochlor     | 1  | 104.3 | 4.7 | 124.9 | 4.2 | 107.8 | 2.0 | 5  | 108.9 | 1.5 | 124.8 | 4.3 | 112.9 | 2.7 | 5  | 107.4 | 3.4 | 124.8 | 2.3 | 113.7 | 1.3 | 5      | 99.8  | 4.6 | 127.6 | 4.6 | 108.1 | 4.3 |
| Propyrisulfuron  | 5  | 82.6  | 0.8 | 85.3  | 6.5 | 88.3  | 2.3 | 5  | 47.0  | 1.0 | 56.7  | 1.8 | 70.5  | 4.3 | 5  | 74.0  | 6.9 | 80.9  | 4.4 | 89.6  | 7.7 | 5      | 84.3  | 7.1 | 86.4  | 5.6 | 84.0  | 6.7 |
| Propyzamide      | 5  | 127.2 | 3.6 | 115.0 | 4.7 | 103.5 | 1.6 | 5  | 123.8 | 1.9 | 118.8 | 3.1 | 103.1 | 2.8 | 5  | 130.9 | 5.5 | 120.4 | 3.7 | 107.2 | 2.8 | 5      | 109.4 | 1.6 | 108.7 | 1.8 | 94.9  | 4.1 |
| Prothioconazole  | 20 | F     | F   | 35.2  | 1.5 | 64.3  | 3.7 | 50 | F     | F   | F     | F   | 79.9  | 7.4 | 5  | 58.2  | 4.8 | 64.9  | 4.7 | 83.8  | 3.9 | N<br>A | F     | F   | F     | F   | F     | F   |
| Pymetrozine      | 5  | 81.6  | 6.3 | 65.1  | 4.4 | 61.9  | 3.9 | 20 | F     | F   | 59.6  | 0.6 | 57.7  | 3.7 | 5  | 82.0  | 6.1 | 64.0  | 2.6 | 67.1  | 7.0 | 20     | F     | F   | 51.2  | 5.8 | 105.7 | 8.1 |
| Pyraclostrobin   | 1  | 117.3 | 7.8 | 116.9 | 5.3 | 102.6 | 2.6 | 1  | 107.9 | 0.5 | 115.4 | 2.0 | 104.4 | 4.1 | 1  | 110.6 | 3.5 | 105.8 | 3.0 | 98.8  | 5.4 | 1      | 97.6  | 3.3 | 96.7  | 3.3 | 89.9  | 2.5 |
| Pyraflufen-ethyl | 1  | 110.6 | 3.5 | 112.5 | 3.1 | 105.6 | 0.9 | 1  | 118.3 | 2.6 | 115.7 | 2.7 | 110.6 | 1.6 | 1  | 118.1 | 1.7 | 116.7 | 0.9 | 108.3 | 3.8 | 1      | 111.9 | 2.8 | 110.7 | 3.7 | 108.9 | 2.4 |
| Pyrametostrobin  | 1  | 140.9 | 3.4 | 129.0 | 5.6 | 112.5 | 3.3 | 1  | 158.3 | 0.3 | 137.2 | 0.5 | 120.0 | 2.7 | 1  | 155.2 | 1.0 | 130.9 | 6.4 | 115.8 | 5.5 | 1      | 144.3 | 3.1 | 127.3 | 4.3 | 113.0 | 4.0 |

|                      |    |       |      |       |      |       |      |    |       |      |       |     |       |      |   |       |      |       |      |       |      |    |       |      |       |     |       |      |
|----------------------|----|-------|------|-------|------|-------|------|----|-------|------|-------|-----|-------|------|---|-------|------|-------|------|-------|------|----|-------|------|-------|-----|-------|------|
| Pyraoxystrobin       | 1  | 98.7  | 1.3  | 96.3  | 2.1  | 93.5  | 7.5  | 1  | 106.2 | 2.9  | 99.4  | 2.9 | 102.3 | 2.6  | 5 | 101.9 | 2.3  | 102.5 | 1.9  | 97.4  | 3.6  | 5  | 106.2 | 2.5  | 96.5  | 2.1 | 95.2  | 4.0  |
| Pyrazosulfuron-ethyl | 10 | F     | F    | 80.2  | 2.2  | 80.1  | 7.4  | 5  | 38.3  | 4.9  | 51.8  | 5.2 | 76.2  | 1.7  | 5 | 66.8  | 3.3  | 72.7  | 1.3  | 89.0  | 9.3  | 5  | 76.9  | 3.0  | 76.5  | 3.5 | 85.5  | 6.7  |
| Pyrethrin 1          | 5  | 88.5  | 25.2 | 84.7  | 99.4 | 125.4 | 7.4  | 20 | F     | F    | 108.2 | 4.0 | 107.1 | 2.6  | 1 | 118.2 | 17.4 | 102.1 | 55.7 | 114.9 | 8.5  | 10 | F     | F    | 93.0  | 0.6 | 93.2  | 3.4  |
| Pyrethrin 2          | 5  | 79.7  | 6.9  | 63.8  | 14.6 | 80.2  | 23.2 | 5  | 117.5 | 25.7 | 103.4 | 4.2 | 101.0 | 2.9  | 5 | 64.7  | 3.4  | 81.1  | 4.2  | 89.4  | 8.5  | 5  | 106.0 | 17.0 | 103.3 | 4.3 | 101.5 | 10.7 |
| Pyribenzoxim         | 5  | 115.6 | 6.2  | 109.1 | 2.0  | 95.1  | 3.0  | 1  | 114.7 | 2.1  | 112.8 | 2.7 | 98.8  | 8.2  | 5 | 112.7 | 5.2  | 102.1 | 1.2  | 98.3  | 1.1  | 5  | 107.5 | 5.4  | 104.8 | 6.1 | 100.5 | 6.2  |
| Pyridaben            | 1  | 98.6  | 3.4  | 102.4 | 0.9  | 98.0  | 3.8  | 1  | 106.8 | 3.8  | 104.6 | 1.4 | 103.2 | 5.1  | 1 | 112.6 | 3.4  | 105.4 | 2.1  | 106.3 | 0.9  | 1  | 100.8 | 5.6  | 99.8  | 3.5 | 97.0  | 0.7  |
| Pyridalyl            | 1  | 114.4 | 8.5  | 115.3 | 3.9  | 114.2 | 2.4  | 1  | 81.9  | 4.1  | 82.2  | 7.2 | 98.6  | 12.0 | 1 | 113.2 | 0.7  | 109.8 | 0.8  | 98.5  | 12.3 | 1  | 65.2  | 12.7 | 68.0  | 4.8 | 75.1  | 16.6 |
| Pyridaphenthion      | 1  | 112.9 | 0.7  | 113.8 | 1.9  | 102.2 | 3.5  | 1  | 118.1 | 5.6  | 119.8 | 2.4 | 109.1 | 2.2  | 1 | 119.5 | 2.5  | 114.4 | 1.5  | 112.3 | 4.3  | 1  | 114.1 | 2.7  | 116.4 | 2.0 | 108.9 | 2.3  |
| Pyrifthalid          | 1  | 108.2 | 3.5  | 106.0 | 3.3  | 92.5  | 2.4  | 1  | 113.2 | 4.5  | 107.9 | 3.2 | 102.0 | 0.8  | 1 | 113.5 | 2.3  | 105.9 | 3.9  | 100.0 | 1.9  | 1  | 105.0 | 1.6  | 104.0 | 3.8 | 97.7  | 1.9  |
| Pyrimethanil         | 1  | 118.7 | 5.2  | 103.8 | 2.9  | 93.1  | 1.9  | 1  | 98.6  | 1.6  | 97.5  | 2.2 | 93.7  | 1.1  | 1 | 96.8  | 4.3  | 94.9  | 3.1  | 101.7 | 2.5  | 1  | 91.9  | 5.0  | 107.1 | 3.5 | 91.5  | 1.0  |
| Pyrimorph            | 5  | 108.3 | 8.3  | 106.7 | 1.8  | 93.3  | 1.6  | 1  | 107.8 | 4.2  | 105.9 | 2.5 | 98.7  | 2.7  | 1 | 111.3 | 2.1  | 99.3  | 1.6  | 94.1  | 5.2  | 1  | 106.6 | 3.7  | 102.0 | 1.6 | 89.4  | 1.6  |
| Pyriproxyfen         | 5  | 102.0 | 2.5  | 103.3 | 2.3  | 98.4  | 2.1  | 1  | 113.9 | 2.2  | 107.9 | 2.4 | 102.9 | 4.2  | 5 | 103.8 | 3.9  | 100.3 | 2.3  | 100.1 | 2.5  | 1  | 105.9 | 1.3  | 103.3 | 1.3 | 98.3  | 1.1  |
| Pyrisoxazole         | 1  | 96.8  | 3.4  | 103.0 | 4.5  | 99.2  | 0.9  | 1  | 109.3 | 3.7  | 111.6 | 1.3 | 109.4 | 2.1  | 1 | 112.7 | 7.2  | 109.9 | 3.9  | 109.4 | 2.5  | 1  | 82.2  | 3.5  | 94.0  | 2.3 | 97.2  | 3.8  |



|                     |    |       |     |       |     |       |      |     |       |     |       |       |       |      |    |       |      |       |      |       |      |    |       |      |       |     |       |      |
|---------------------|----|-------|-----|-------|-----|-------|------|-----|-------|-----|-------|-------|-------|------|----|-------|------|-------|------|-------|------|----|-------|------|-------|-----|-------|------|
| Quinalphos          | 5  | 159.1 | 3.4 | 140.8 | 3.9 | 115.0 | 1.4  | 5   | 158.8 | 2.7 | 145.8 | 3.4   | 118.1 | 0.5  | 5  | 159.1 | 2.7  | 132.1 | 3.2  | 110.3 | 1.2  | 5  | 147.1 | 1.9  | 130.8 | 6.0 | 112.1 | 0.8  |
| Quinclorac          | NA | F     | F   | F     | F   | F     | F    | 100 | F     | F   | F     | F     | F     | F    | 50 | F     | F    | F     | F    | 7.3   | 42.8 | 50 | F     | F    | F     | F   | 8.4   | 13.7 |
| Quinoxifen          | 1  | 98.2  | 3.9 | 95.8  | 2.7 | 91.6  | 3.0  | 1   | 112.8 | 2.6 | 100.0 | 3.7   | 98.0  | 2.3  | 1  | 108.1 | 1.5  | 103.4 | 1.4  | 95.6  | 4.8  | 1  | 100.2 | 1.6  | 96.1  | 3.0 | 84.5  | 2.8  |
| Quizalofop FreeAcid | 50 | F     | F   | F     | F   | 6.9   | 12.5 | 10  | F     | F   | 0.8   | 134.4 | 11.4  | 8.5  | 5  | 4.0   | 1.5  | 9.0   | 14.0 | 22.0  | 18.2 | 1  | 20.0  | 16.0 | 24.7  | 4.8 | 39.1  | 4.0  |
| Quizalofop-ethyl    | 1  | 109.0 | 5.4 | 107.2 | 5.5 | 99.1  | 2.3  | 1   | 128.5 | 3.7 | 118.2 | 3.5   | 106.7 | 1.6  | 1  | 115.3 | 1.2  | 107.0 | 1.5  | 96.2  | 1.3  | 1  | 104.2 | 5.0  | 98.6  | 2.0 | 94.4  | 1.7  |
| Rimsulfuron         | 5  | 64.7  | 6.9 | 67.4  | 3.9 | 74.1  | 0.6  | 5   | 21.0  | 8.1 | 29.0  | 5.0   | 54.4  | 5.4  | 5  | 44.0  | 2.0  | 52.8  | 3.1  | 71.7  | 8.9  | 5  | 67.9  | 5.0  | 70.7  | 3.3 | 77.8  | 7.1  |
| Rotenone            | 5  | 103.1 | 3.4 | 101.2 | 3.1 | 95.3  | 3.5  | 5   | 170.8 | 1.2 | 128.6 | 26.9  | 94.7  | 32.5 | 20 | F     | F    | 78.3  | 31.0 | 106.3 | 1.3  | 5  | 122.9 | 4.1  | 113.3 | 5.8 | 115.6 | 31.8 |
| Saflufenacil        | NA | F     | F   | F     | F   | F     | F    | NA  | F     | F   | F     | F     | F     | F    | NA | F     | F    | F     | F    | F     | F    | F  | NA    | F    | F     | F   | F     | F    |
| Sedaxane            | 1  | 101.9 | 1.1 | 95.8  | 3.6 | 90.1  | 5.0  | 1   | 109.9 | 2.1 | 104.5 | 2.3   | 101.0 | 1.0  | 1  | 108.3 | 3.9  | 101.5 | 3.0  | 102.5 | 4.2  | 5  | 104.2 | 3.0  | 97.6  | 1.6 | 96.7  | 4.0  |
| Sethoxydim          | 1  | 60.3  | 4.0 | 71.9  | 2.6 | 87.7  | 4.7  | 1   | 88.7  | 3.3 | 82.1  | 5.5   | 89.0  | 1.8  | 1  | 68.7  | 18.0 | 64.6  | 2.7  | 86.8  | 1.6  | 5  | 76.3  | 5.4  | 71.7  | 6.9 | 79.8  | 5.2  |
| Silthiofam          | 1  | 118.0 | 1.5 | 117.8 | 1.3 | 107.0 | 2.4  | 1   | 117.3 | 7.6 | 121.9 | 3.9   | 109.4 | 3.3  | 1  | 122.2 | 3.1  | 116.5 | 3.7  | 111.5 | 3.0  | 1  | 111.8 | 1.4  | 117.0 | 4.0 | 105.5 | 2.0  |
| Simazine            | 5  | 118.2 | 5.6 | 106.3 | 4.6 | 94.5  | 1.6  | 5   | 127.6 | 3.6 | 119.7 | 1.6   | 104.0 | 1.0  | 1  | 114.8 | 2.2  | 103.1 | 7.8  | 99.7  | 2.0  | 5  | 109.6 | 3.6  | 105.9 | 3.7 | 93.8  | 1.5  |
| Simetryn            | 5  | 102.7 | 1.2 | 96.1  | 6.6 | 89.7  | 2.9  | 1   | 105.0 | 4.3 | 96.0  | 3.7   | 98.5  | 4.4  | 1  | 104.4 | 1.3  | 95.5  | 4.1  | 95.8  | 0.9  | 1  | 96.6  | 1.8  | 90.6  | 4.5 | 87.5  | 5.1  |

|                 |     |       |      |       |     |       |     |    |       |      |       |     |       |     |    |       |     |       |      |       |      |    |       |      |       |     |       |     |
|-----------------|-----|-------|------|-------|-----|-------|-----|----|-------|------|-------|-----|-------|-----|----|-------|-----|-------|------|-------|------|----|-------|------|-------|-----|-------|-----|
| Spinetoram      | 1   | 97.4  | 4.4  | 101.2 | 4.5 | 96.2  | 5.7 | 1  | 97.3  | 2.5  | 93.5  | 3.7 | 96.0  | 2.9 | 1  | 87.6  | 3.4 | 88.8  | 4.2  | 91.9  | 6.0  | 5  | 77.3  | 3.0  | 79.8  | 2.6 | 81.6  | 4.6 |
| Spinosad        | 50  | F     | F    | F     | F   | 89.5  | 8.7 | 5  | 88.0  | 1.9  | 86.0  | 3.7 | 90.0  | 6.9 | 5  | 81.3  | 3.9 | 81.4  | 1.6  | 88.1  | 4.1  | 5  | 84.1  | 3.2  | 80.9  | 1.4 | 86.3  | 3.1 |
| Spirodiclofen   | 1   | 102.4 | 3.9  | 105.7 | 2.0 | 97.2  | 0.4 | 1  | 104.7 | 2.4  | 102.7 | 1.7 | 95.9  | 3.9 | 1  | 114.2 | 5.1 | 106.0 | 2.2  | 98.4  | 3.4  | 1  | 98.2  | 6.6  | 96.2  | 3.2 | 91.8  | 1.2 |
| Spirotetramat   | 1   | 109.7 | 5.3  | 101.6 | 1.6 | 93.3  | 2.5 | 5  | 118.7 | 4.7  | 111.3 | 5.2 | 101.7 | 2.7 | 20 | F     | F   | 113.4 | 3.2  | 109.8 | 3.3  | 5  | 120.1 | 2.9  | 103.5 | 2.7 | 93.6  | 5.0 |
| Sulcotrione     | 100 | F     | F    | F     | F   | F     | F   | 50 | F     | F    | F     | F   | 31.0  | 1.4 | 50 | F     | F   | F     | F    | 27.7  | 24.6 | 50 | F     | F    | F     | F   | 19.3  | 9.4 |
| Sulfentrazone   | 5   | 81.9  | 15.3 | 96.1  | 4.3 | 87.3  | 1.4 | 5  | 98.9  | 6.0  | 94.5  | 3.7 | 95.0  | 1.7 | 5  | 104.2 | 4.9 | 99.4  | 1.8  | 99.4  | 3.6  | 5  | 92.2  | 5.3  | 95.0  | 2.9 | 94.2  | 4.8 |
| Sulfluramid     | 1   | 104.8 | 3.5  | 97.3  | 4.1 | 97.1  | 5.1 | 1  | 106.7 | 5.4  | 95.7  | 2.8 | 102.1 | 3.9 | 1  | 86.7  | 0.5 | 94.2  | 0.9  | 96.6  | 3.9  | 1  | 101.7 | 3.6  | 95.8  | 1.5 | 97.4  | 3.0 |
| Sulfotepp       | 1   | 128.0 | 3.9  | 126.6 | 3.0 | 111.0 | 1.1 | 1  | 134.5 | 2.8  | 130.0 | 0.6 | 110.6 | 1.5 | 1  | 136.2 | 1.8 | 122.5 | 4.0  | 111.0 | 2.5  | 1  | 121.2 | 1.9  | 122.5 | 4.4 | 109.2 | 2.4 |
| Sulfoxaflor     | 5   | 117.1 | 3.1  | 110.9 | 2.2 | 97.8  | 4.7 | 1  | 124.1 | 9.1  | 106.0 | 2.9 | 113.0 | 1.2 | 5  | 124.6 | 4.0 | 114.3 | 3.6  | 103.7 | 1.5  | 5  | 102.5 | 5.1  | 95.5  | 3.2 | 88.3  | 4.5 |
| Tau-fluvalinate | 20  | F     | F    | 108.4 | 4.6 | 102.6 | 3.1 | 20 | F     | F    | 97.9  | 4.5 | 98.1  | 1.9 | 20 | F     | F   | 74.1  | 15.0 | 94.0  | 9.9  | 5  | 53.5  | 55.1 | 76.5  | 5.8 | 82.4  | 0.6 |
| Tebuconazole    | 1   | 99.0  | 10.4 | 113.0 | 2.3 | 97.9  | 3.1 | 1  | 98.3  | 10.5 | 81.7  | 6.2 | 81.0  | 6.3 | 5  | 108.8 | 4.5 | 101.0 | 3.3  | 101.2 | 3.2  | 5  | 108.2 | 4.7  | 97.0  | 3.2 | 96.2  | 2.0 |
| Tebufenozide    | 5   | 92.6  | 3.6  | 101.4 | 1.0 | 99.6  | 1.8 | 1  | 116.6 | 7.3  | 116.3 | 4.2 | 106.3 | 3.2 | 5  | 101.9 | 5.6 | 105.3 | 3.7  | 106.2 | 4.5  | 5  | 101.1 | 3.2  | 107.3 | 7.1 | 102.4 | 1.8 |
| Tebuthiuron     | 1   | 114.8 | 3.5  | 116.2 | 0.8 | 104.3 | 2.3 | 1  | 121.7 | 2.1  | 118.0 | 4.0 | 108.0 | 0.9 | 1  | 119.2 | 3.9 | 112.4 | 2.6  | 108.9 | 2.2  | 1  | 107.5 | 2.8  | 111.2 | 3.0 | 100.1 | 1.3 |
| Teflubenzuron   | 5   | 101.  | 14.  | 106   | 1.3 | 103.  | 4.7 | 5  | 123   | 4.3  | 116.  | 3.1 | 108.  | 0.9 | 5  | 113   | 6.3 | 110.  | 2.8  | 104.  | 1.1  | 5  | 97.   | 10.  | 96.   | 6.2 | 89.1  | 4.9 |







|            |   |       |     |       |     |       |     |   |       |     |       |     |       |     |   |       |     |       |     |       |     |   |       |     |       |     |       |     |
|------------|---|-------|-----|-------|-----|-------|-----|---|-------|-----|-------|-----|-------|-----|---|-------|-----|-------|-----|-------|-----|---|-------|-----|-------|-----|-------|-----|
|            |   |       |     | 6     |     |       |     |   | .9    |     |       |     |       |     | 3 |       |     |       |     |       |     | 2 |       | 0   |       |     |       |     |
| Vamidotion | 1 | 114.8 | 8.6 | 104.8 | 5.1 | 99.3  | 2.2 | 1 | 122.2 | 4.5 | 109.9 | 1.2 | 108.9 | 2.2 | 1 | 119.3 | 1.0 | 110.6 | 1.6 | 99.8  | 1.7 | 1 | 108.4 | 1.1 | 98.0  | 2.6 | 86.0  | 6.5 |
| Zoxamide   | 1 | 111.8 | 2.8 | 113.5 | 1.8 | 106.7 | 1.0 | 1 | 117.1 | 4.7 | 114.6 | 1.8 | 108.9 | 1.4 | 1 | 118.6 | 2.8 | 116.3 | 1.7 | 109.1 | 3.1 | 1 | 109.8 | 3.4 | 111.5 | 2.6 | 106.7 | 1.4 |
| Metamitron | 5 | 116.8 | 1.8 | 110.9 | 0.5 | 97.9  | 2.7 | 1 | 110.9 | 0.7 | 107.6 | 0.8 | 101.9 | 2.6 | 1 | 118.6 | 2.5 | 107.9 | 2.8 | 106.2 | 2.4 | 1 | 107.2 | 3.7 | 101.4 | 1.9 | 92.8  | 1.0 |

SDL refers to screening detection limits, F represents recovery or RSD is not acceptable, NA is defined as not detected.

**Table S7** Matrix effects for the 403 database compounds in the eight representative matrices.

| No. | Compound name           | Asparagus bean (ME, %) | Cucumber (ME, %) | Chinese cabbage (ME, %) | Ginger (ME, %) | Carrot (ME, %) | Apple (ME, %) | Watermelon (ME, %) | Pear (ME, %) |
|-----|-------------------------|------------------------|------------------|-------------------------|----------------|----------------|---------------|--------------------|--------------|
| 1   | Triclopyricarb          | -28.03                 | -24.50           | -31.20                  | -69.18         | -30.23         | -7.37         | -37.85             | -19.49       |
| 2   | Amitrole                | -46.97                 | -31.78           | -30.15                  | 6.57           | -28.79         | -32.76        | -29.14             | -86.51       |
| 3   | Moroxydinehydrochloride | -33.50                 | -20.80           | -38.29                  | -17.63         | -24.46         | -20.09        | -14.10             | -37.05       |
| 4   | Nicotine                | -24.01                 | 8.37             | -92.73                  | -89.53         | -89.56         | -83.38        | -84.13             | -87.92       |
| 5   | Matrine                 | -13.80                 | -7.64            | -27.15                  | -3.15          | -9.30          | 1.53          | 2.10               | -22.45       |
| 6   | Methamidophos           | -33.31                 | -15.29           | -39.91                  | -6.91          | -9.34          | -2.80         | -4.20              | -20.04       |
| 7   | Maleic hydrazide        | ND                     | ND               | ND                      | ND             | ND             | ND            | ND                 | ND           |
| 8   | Daminozide              | -94.04                 | -94.98           | -96.76                  | -95.75         | -95.32         | -95.07        | -94.55             | -93.44       |
| 9   | Cyromazine              | -93.09                 | -89.54           | -93.27                  | -90.80         | -90.40         | -85.75        | -84.13             | -91.84       |
| 10  | Aminocyclopyrachlo      | -96.99                 | -34.19           | -22.87                  | -40.31         | -26.81         | -32.62        | -17.65             | -45.96       |
| 11  | Acephate                | -23.99                 | -5.52            | -37.65                  | 4.73           | -0.96          | 11.17         | 17.55              | -12.38       |
| 12  | Thiocyclam              | -7.10                  | -4.31            | -15.86                  | 3.28           | -6.18          | -2.72         | -8.07              | -10.87       |
| 13  | Pymetrozine             | -17.19                 | -15.47           | -59.53                  | -1.16          | 1.44           | -5.10         | -0.91              | -9.51        |
| 14  | Aminopyralid            | 4.31                   | -10.09           | -72.09                  | 7.64           | 5.83           | -15.96        | -4.19              | -2.99        |
| 15  | Omethoate               | -13.75                 | -13.18           | -44.66                  | -1.84          | -12.26         | 2.55          | 7.09               | -13.96       |
| 16  | Propamocarb             | -4.57                  | -3.84            | -4.52                   | 0.90           | -5.42          | 4.40          | 8.24               | -9.66        |
| 17  | Aldicarb sulfoxide      | -21.27                 | -18.00           | -27.04                  | -10.95         | -22.85         | 0.28          | 7.73               | -15.14       |
| 18  | OxiMinoOxaMyl           | -19.77                 | -11.82           | -56.85                  | 13.40          | 8.24           | -2.07         | 23.11              | 0.34         |
| 19  | Metaldehyde             | ND                     | ND               | ND                      | ND             | 85.92          | ND            | ND                 | ND           |
| 20  | Aldoxycarb              | -20.15                 | -17.81           | -14.82                  | -20.18         | -17.95         | -3.22         | -1.52              | -13.98       |
| 21  | Dinotefuran             | -37.38                 | -31.94           | -54.93                  | -28.29         | -32.52         | -19.55        | -24.50             | -38.50       |
| 22  | Oxamyl                  | 3.27                   | -23.99           | -31.08                  | -23.08         | 14.36          | -10.72        | 0.86               | -21.44       |
| 23  | Clopyralid              | -53.42                 | -67.02           | ND                      | -62.28         | -23.49         | -23.66        | 102.26             | 274.72       |
| 24  | Oxydemeton-methyl       | -25.55                 | -24.91           | -34.91                  | -23.33         | -22.77         | -13.57        | -6.83              | -25.51       |
| 25  | Thiamethoxam            | -8.45                  | -9.47            | -28.84                  | -8.17          | -3.75          | 7.62          | 2.67               | -20.08       |
| 26  | Dazomet                 | -27.25                 | -33.17           | -27.73                  | -33.84         | -27.80         | -13.11        | -7.52              | -85.08       |
| 27  | Flonicamid              | -45.22                 | -45.15           | -54.92                  | -43.54         | -39.02         | -26.15        | -27.64             | -45.70       |
| 28  | Methomyl                | -22.12                 | -26.75           | -37.54                  | -29.64         | -19.13         | -11.86        | 4.14               | -27.61       |
| 29  | Chlordimeform           | -12.66                 | -11.04           | -30.84                  | -19.07         | -8.95          | -3.67         | 3.14               | -34.64       |
| 30  | Monocrotophos           | -11.90                 | -19.01           | -28.61                  | -16.99         | -15.51         | -6.15         | 6.23               | -25.18       |
| 31  | Phosfolan-methyl        | -20.77                 | -26.23           | -36.19                  | -17.85         | -15.54         | -9.71         | -3.10              | -31.69       |
| 32  | Topramezone             | -35.92                 | -32.31           | -27.21                  | -22.60         | -26.90         | -17.24        | -0.69              | -19.79       |
| 33  | Carbendazim             | -21.58                 | -21.95           | -32.50                  | -29.86         | -11.89         | -10.30        | -2.21              | -43.25       |
| 34  | Imidacloprid            | -13.66                 | -16.44           | -27.05                  | -9.37          | -11.74         | -1.69         | -3.03              | -9.67        |
| 35  | Imazapyr                | -7.83                  | -12.38           | -14.52                  | -18.05         | -8.69          | 1.64          | 0.50               | -14.95       |
| 36  | Clothianidin            | -35.60                 | -33.00           | -45.55                  | -35.24         | -30.19         | -26.78        | -26.65             | -23.49       |
| 37  | Methiocarb sulfoxide    | -10.38                 | -13.81           | -21.71                  | -20.50         | -11.85         | -1.73         | -0.62              | -17.44       |

|    |                           |        |        |        |        |        |        |        |        |
|----|---------------------------|--------|--------|--------|--------|--------|--------|--------|--------|
| 38 | Flumetsulam               | 0.38   | -3.88  | 11.10  | 21.01  | -10.29 | -11.64 | 7.44   | -10.02 |
| 39 | Hexanoic acid             | -54.33 | -48.09 | -61.19 | -51.79 | -40.99 | -26.24 | -16.10 | -40.74 |
| 40 | Phthalide                 | 68.29  | 5.93   | 4.34   | -4.66  | -0.76  | 3.21   | 8.02   | 14.10  |
| 41 | Phorate oxon sulfoxide    | -8.99  | -7.91  | -22.44 | -13.00 | -9.98  | -3.87  | 7.28   | -17.53 |
| 42 | Vamidothion               | -12.07 | -9.97  | -24.01 | -7.12  | -10.06 | -2.60  | 8.47   | -19.64 |
| 43 | 3OH-Carbofuran            | -9.67  | -6.40  | -21.92 | -14.72 | -6.32  | 1.57   | 5.64   | -13.93 |
| 44 | Difenzoquat               | 2.90   | -1.38  | -7.98  | -0.87  | -3.92  | 4.86   | 16.46  | -97.14 |
| 45 | Imidaclothiz              | 0.32   | -4.01  | -18.30 | 2.71   | -6.77  | -0.70  | 12.13  | -13.59 |
| 46 | Acetamiprid               | -6.01  | -5.29  | -18.52 | -12.03 | -9.57  | -31.33 | 4.21   | -10.80 |
| 47 | Thiabendazole             | -27.86 | -20.05 | -38.75 | -32.04 | -20.42 | -8.67  | -9.90  | -25.34 |
| 48 | Benziothiazolinone        | -11.90 | -14.62 | -13.46 | -3.47  | -12.03 | -4.55  | 677.02 | -8.02  |
| 49 | Trichlorfon               | -14.67 | -13.28 | -28.88 | -16.26 | -15.91 | -13.32 | -9.10  | -14.79 |
| 50 | Dimethoate                | -13.57 | -14.00 | -21.96 | -15.91 | -10.98 | -4.86  | -1.18  | -15.18 |
| 51 | Metamitron                | -19.74 | -19.30 | -24.00 | -23.24 | -15.03 | -9.09  | -6.78  | -21.64 |
| 52 | Oxycarboxin               | 90.55  | 112.94 | -31.43 | -37.11 | -12.87 | -19.02 | 21.86  | 62.72  |
| 53 | Methiocarb sulfone        | -2.16  | -8.06  | -13.86 | -14.65 | -3.64  | -0.44  | 2.95   | -6.24  |
| 54 | Sulfoxafloz               | -22.69 | -18.13 | -30.76 | -28.62 | -14.88 | -13.31 | -8.83  | -21.66 |
| 55 | Imazamox                  | -4.75  | -10.49 | -14.50 | -10.70 | -9.85  | -1.46  | 0.48   | -9.20  |
| 56 | Imazapic                  | 1.27   | -7.06  | -14.16 | -8.51  | -2.18  | 4.04   | 3.80   | -7.06  |
| 57 | Thiacloprid               | -7.93  | -6.46  | -28.91 | -14.49 | -8.71  | -2.99  | -2.48  | -14.39 |
| 58 | Cymoxanil                 | -16.97 | -16.89 | -40.65 | -24.68 | -14.91 | -10.71 | -10.99 | -19.36 |
| 59 | Mesotrione                | 17.54  | 10.51  | -20.16 | 12.11  | 4.15   | 17.66  | 24.02  | 2.96   |
| 60 | Flucarbazone              | 9.94   | 14.25  | -19.02 | 12.51  | 3.12   | 9.35   | 20.28  | -12.94 |
| 61 | Dicamba                   | 139.53 | 148.30 | 261.83 | 102.53 | 61.48  | 73.52  | 133.50 | 146.74 |
| 62 | Phosfolan                 | -19.31 | -12.46 | -24.21 | -16.79 | -13.98 | -11.60 | -11.96 | -18.95 |
| 63 | Florasulam                | 24.52  | 9.02   | -1.37  | 3.92   | -13.47 | -16.07 | 7.02   | 2.37   |
| 64 | Tricyclazole              | -6.33  | 0.00   | -14.16 | -6.96  | -3.83  | 1.45   | 2.03   | -9.40  |
| 65 | Aldicarb                  | -12.73 | -26.93 | -42.13 | -41.76 | -23.38 | -13.08 | -19.62 | -31.70 |
| 66 | Ethirimol                 | -27.00 | -20.47 | -31.19 | -22.27 | -15.16 | -11.45 | -9.80  | -24.22 |
| 67 | Phosphamidon              | 56.50  | 61.15  | 41.76  | 44.30  | 52.86  | 68.51  | 69.37  | 9.32   |
| 68 | Prohexadione              | -13.71 | 0.58   | -18.84 | -18.26 | -4.55  | -2.32  | -5.88  | 54.41  |
| 69 | Oxadixyl                  | -11.69 | -7.25  | -23.45 | -23.76 | -20.47 | 2.11   | -14.18 | -31.39 |
| 70 | Quinclorac                | -2.08  | -1.32  | -2.50  | 0.38   | -5.43  | 0.28   | 1.04   | -0.05  |
| 71 | Monosulfuron              | 110.76 | 117.68 | 103.84 | 108.83 | 68.43  | 115.19 | 127.33 | 101.57 |
| 72 | Sulcotrione               | -0.13  | -4.74  | -22.49 | -14.69 | -13.91 | -6.49  | -0.20  | -17.37 |
| 73 | Thiencarbazone-<br>methyl | 23.16  | 16.13  | 7.33   | 8.11   | -0.89  | 5.32   | 15.21  | 5.67   |
| 74 | Imazethapyr               | 3.76   | -1.15  | -7.14  | -8.09  | -4.89  | 1.81   | 7.65   | -9.27  |
| 75 | Bentazone                 | 23.89  | 17.98  | 8.86   | 33.23  | -1.75  | -0.90  | 40.42  | 6.05   |
| 76 | Cyanazine                 | -5.08  | -13.89 | -17.08 | -20.25 | -16.66 | -2.06  | 2.31   | -7.21  |
| 77 | Cinosulfuron              | 6.47   | 2.24   | -22.13 | -19.36 | -30.59 | -22.10 | -11.33 | -21.94 |
| 78 | Pirimicarb                | -17.73 | -24.54 | -20.34 | -11.11 | -5.48  | -3.02  | -6.58  | -10.69 |



|     |                            |        |        |        |        |        |        |        |        |
|-----|----------------------------|--------|--------|--------|--------|--------|--------|--------|--------|
| 79  | Probenazole                | -22.49 | -21.28 | -32.65 | -25.05 | -7.71  | -16.54 | -6.73  | -20.55 |
| 80  | Benazolin                  | -6.26  | 14.14  | -4.07  | 13.42  | 2.55   | -4.43  | 12.16  | 4.67   |
| 81  | Dichlorvos                 | -11.56 | -22.82 | -9.88  | -9.14  | -2.93  | -1.32  | -11.41 | -16.68 |
| 82  | Fluroxypyr                 | 1.76   | -33.51 | -33.51 | 21.19  | 14.65  | 25.70  | 22.01  | 32.16  |
| 83  | Triasulfuron               | 51.07  | 57.21  | 16.27  | 32.33  | -1.97  | 10.08  | 51.02  | 0.79   |
| 84  | Carbofuran                 | -13.69 | -9.93  | -3.09  | -36.83 | -0.55  | 3.63   | 2.30   | -2.06  |
| 85  | Phenamacril                | -22.90 | -22.84 | -21.21 | -31.23 | -5.57  | 0.50   | -6.70  | -4.82  |
| 86  | Thifensulfuron-methyl      | 29.64  | 17.58  | 9.61   | 50.51  | -1.02  | 23.78  | 4.38   | -0.97  |
| 87  | Metribuzin                 | -9.62  | -8.58  | -13.63 | -34.87 | -5.07  | -11.95 | -1.57  | -8.41  |
| 88  | Hexazinone                 | -4.79  | -7.60  | -12.29 | -30.71 | -1.51  | 3.59   | 3.02   | -5.78  |
| 89  | Fenamiphos sulfoxide       | 5.85   | 2.78   | -3.55  | -10.67 | -7.73  | 6.04   | 2.01   | -8.21  |
| 90  | Thiophanate-methyl         | -14.25 | -10.63 | -21.28 | -14.32 | -14.79 | 7.63   | 5.52   | -16.11 |
| 91  | Ethametsulfuron            | ND     |
| 92  | Nicosulfuron               | 0.16   | 3.68   | -16.72 | 1.61   | -12.22 | -2.67  | 4.91   | -16.31 |
| 93  | Fenamiphos sulfone         | 0.74   | -1.19  | -12.60 | 3.17   | -11.17 | -3.54  | 0.90   | -10.76 |
| 94  | Tebuthiuron                | -15.99 | -21.61 | -19.83 | -36.77 | -14.45 | -3.43  | -2.25  | -15.99 |
| 95  | Imazaquin                  | -4.99  | -8.22  | -10.57 | -24.61 | -9.08  | 1.71   | 5.66   | -13.52 |
| 96  | Metsulfuron-methyl         | 6.48   | 13.54  | -6.73  | 25.59  | -7.63  | -4.51  | 4.02   | -6.81  |
| 97  | Fenthion sulfoxide         | -2.61  | -0.87  | -6.30  | -2.71  | -12.63 | 0.87   | 12.00  | -1.94  |
| 98  | Sulfentrazone              | 15.20  | 21.01  | 21.01  | 5.24   | -0.04  | 2.72   | 23.74  | 8.21   |
| 99  | Thidiazuron                | -36.92 | -21.02 | -22.65 | -26.63 | -17.53 | -9.84  | -0.08  | -13.15 |
| 100 | Simazine                   | -11.22 | -15.44 | -11.41 | -23.59 | -8.95  | -0.66  | 4.19   | -10.27 |
| 101 | Simetryn                   | -18.07 | -15.67 | -18.25 | -13.96 | -4.33  | 0.00   | -13.13 | -4.20  |
| 102 | Carbaryl                   | -5.18  | -9.79  | -8.13  | -11.06 | -5.40  | 5.60   | -1.66  | -3.45  |
| 103 | Imazalil                   | -11.82 | -11.75 | -16.23 | -8.37  | -3.47  | 3.74   | 1.25   | -8.82  |
| 104 | Dithianon                  | ND     |
| 105 | Carboxin                   | -44.68 | -33.72 | -26.66 | -8.82  | -6.23  | -1.54  | -4.48  | -20.71 |
| 106 | Cartap                     | -43.62 | -30.60 | -25.50 | -5.49  | -7.70  | -1.64  | -3.84  | -18.56 |
| 107 | Chlorsulfuron              | 12.34  | 20.27  | 1.19   | 14.97  | 2.97   | 9.13   | 8.57   | -2.70  |
| 108 | Fosthiazate                | -10.87 | -16.11 | -14.84 | -9.69  | -7.31  | 1.10   | -0.42  | -8.30  |
| 109 | Fenthion sulfone           | -2.84  | -0.52  | -14.09 | -9.59  | -10.46 | -1.27  | 9.29   | -3.36  |
| 110 | Cyantranilprole            | -21.15 | -17.04 | -25.22 | -28.60 | -23.07 | -4.08  | -2.49  | -20.57 |
| 111 | Penoxsulam                 | 13.05  | 35.35  | -2.73  | 15.78  | -6.32  | 0.13   | 19.71  | -1.93  |
| 112 | Disulfoton-sulfoxide       | -3.90  | -10.30 | -10.91 | -12.47 | -6.75  | -0.52  | -0.87  | -3.64  |
| 113 | Phorate sulfoxide          | -5.91  | -13.41 | -12.94 | -14.53 | -4.78  | 4.90   | 3.37   | -4.78  |
| 114 | Phorate oxon sulfone       | ND     |
| 115 | Amidosulfuron              | 14.41  | 30.18  | 13.07  | 10.03  | -8.22  | -0.40  | 0.44   | -13.24 |
| 116 | Rimsulfuron                | -7.49  | -11.34 | -15.63 | -6.91  | -11.15 | -3.75  | -5.51  | -21.05 |
| 117 | Phenazino-1-carboxylicacid | -16.49 | -17.24 | -23.87 | -18.92 | -9.49  | -0.57  | -1.78  | -9.02  |
| 118 | Isoproc carb               | -6.78  | -7.02  | -9.31  | -5.92  | -0.21  | 3.39   | 3.74   | 0.46   |
| 119 | Disulfoton sulfone         | -3.00  | -7.59  | -12.33 | -7.21  | -8.27  | -0.39  | 0.68   | -4.81  |
| 120 | Metazachlor                | -10.55 | -19.33 | -13.29 | -11.21 | -10.00 | -81.17 | 2.76   | -9.51  |

|     |                                |        |        |        |        |        |        |        |        |
|-----|--------------------------------|--------|--------|--------|--------|--------|--------|--------|--------|
| 121 | 1-naphthylacetic acid          | 20.30  | -7.33  | -5.75  | 31.00  | -39.23 | 38.58  | 46.85  | 41.96  |
| 122 | Phorate sulfone                | -6.25  | -16.17 | -13.69 | -12.07 | -8.73  | 4.20   | 4.50   | -8.53  |
| 123 | Chlorotoluron                  | -3.76  | -10.16 | -8.58  | -8.43  | -4.14  | 6.40   | 6.25   | -6.17  |
| 124 | Bromoxynil                     | 28.87  | 29.14  | 29.27  | 31.26  | 23.19  | 20.28  | 14.13  | 15.03  |
| 125 | Flutriafol                     | -0.41  | -2.48  | -8.45  | -4.64  | -1.16  | -2.15  | 0.50   | -1.53  |
| 126 | Thiodicarb                     | 0.35   | -5.39  | -7.77  | -6.34  | -1.61  | 4.83   | 5.70   | -6.23  |
| 127 | Propachlor                     | -9.39  | -16.48 | -16.32 | -13.85 | -7.40  | -2.63  | 1.19   | -10.99 |
| 128 | 2,4-Dichlorophenoxyacetic acid | 28.15  | 24.56  | 25.58  | 24.15  | 12.01  | 13.03  | 10.65  | 8.75   |
| 129 | Phorate oxon                   | 1.64   | -44.33 | -37.59 | -0.39  | 1.97   | -4.72  | 26.02  | -8.58  |
| 130 | Atrazine                       | -7.77  | -12.76 | -11.97 | -11.59 | -5.31  | -0.40  | 5.76   | -0.20  |
| 131 | Metalaxyl                      | -6.41  | -8.31  | -9.49  | -5.82  | -1.31  | 1.70   | 6.02   | -2.81  |
| 132 | Fenpropidin                    | -4.93  | -10.52 | -6.77  | -4.77  | 0.15   | -3.90  | 4.87   | -0.92  |
| 133 | Isoproturon                    | -8.62  | -11.31 | -2.29  | -2.47  | 2.87   | 7.94   | -3.77  | 3.95   |
| 134 | Isoxaflutole                   | -30.11 | -27.34 | -42.28 | -36.31 | -33.49 | -26.04 | -5.91  | -22.93 |
| 135 | Ethoxyquin                     | -90.90 | -80.26 | -91.90 | -94.01 | -52.40 | -5.38  | -23.36 | -55.90 |
| 136 | Mesosulfuron-methyl            | 8.32   | 25.12  | -1.95  | 11.05  | -1.92  | 7.91   | 15.79  | -1.64  |
| 137 | Tribenuron-methyl              | 0.14   | -0.57  | -12.62 | -9.03  | -7.32  | 13.50  | 14.24  | -24.49 |
| 138 | Pyrisoxazole                   | -13.56 | -21.10 | -14.34 | -13.52 | -13.54 | 3.80   | 0.27   | -8.11  |
| 139 | Fenpropimorph                  | -9.12  | -17.64 | -8.90  | -11.81 | -6.32  | 2.75   | 4.67   | -1.70  |
| 140 | Ametryn                        | -11.55 | -16.26 | -13.62 | -16.96 | -7.14  | 1.43   | 3.37   | -4.89  |
| 141 | Clotrimazole                   | -9.09  | 0.00   | 0.00   | 81.82  | -9.09  | -9.09  | 127.27 | -9.09  |
| 142 | Orthosulfamuron                | -2.66  | 0.59   | -19.61 | -8.41  | -19.74 | -6.60  | -1.28  | -36.45 |
| 143 | Isocarbophos                   | -32.56 | -51.81 | -28.17 | -25.72 | -20.43 | 2.94   | -1.00  | -7.65  |
| 144 | Trinexapac-ethyl               | -1.31  | 0.90   | -2.83  | -4.42  | -0.08  | 6.84   | 7.17   | -6.48  |
| 145 | Flumorph                       | -4.41  | 3.66   | -19.53 | -11.47 | -10.53 | -5.81  | 1.40   | -1.33  |
| 146 | ClethodiM Sulfone              | 48.24  | 90.63  | 24.18  | 76.48  | 26.03  | 29.43  | 32.72  | 33.43  |
| 147 | Diuron                         | -9.22  | -15.62 | -10.53 | -20.68 | -9.61  | -1.37  | -0.39  | -9.25  |
| 148 | Thiophanate                    | -16.77 | -12.18 | -17.74 | -13.39 | -18.43 | 3.56   | 3.10   | -21.95 |
| 149 | ClethodiM Sulfoxide            | 56.42  | 63.87  | 23.96  | 38.57  | 19.11  | 26.35  | 30.67  | 30.46  |
| 150 | Captan                         | ND     |
| 151 | Clomazone                      | -6.02  | -8.68  | -11.28 | -11.92 | -3.00  | 4.63   | 4.14   | -3.84  |
| 152 | Hymexazol                      | -6.23  | -6.85  | -16.51 | -9.87  | 0.89   | 8.00   | 7.08   | 1.11   |
| 153 | Methidathion                   | -11.03 | -19.60 | -16.88 | -20.48 | -5.77  | 6.05   | 6.29   | -5.41  |
| 154 | Demeton                        | 33.69  | 21.38  | 63.66  | 49.85  | 58.38  | 82.16  | 85.29  | 66.31  |
| 155 | Desmedipham                    | -3.71  | -5.41  | -8.80  | -7.03  | -4.83  | 3.39   | 5.68   | -0.10  |
| 156 | Chlorantraniliprole            | -6.72  | -7.89  | -9.61  | -15.99 | -6.28  | 1.88   | 11.56  | -7.92  |
| 157 | Forchlorfenuron                | 2.36   | 0.94   | -3.02  | -10.27 | -1.71  | 8.35   | 9.09   | -2.49  |
| 158 | Triforine                      | -32.51 | -41.37 | -37.87 | -45.83 | -25.41 | -17.46 | -2.51  | -26.76 |
| 159 | Pyrimethanil                   | -8.95  | -14.77 | -13.42 | -8.17  | 0.71   | 9.02   | 7.24   | -5.11  |
| 160 | Flumioxazin                    | -93.06 | -52.37 | -47.51 | -55.05 | -31.39 | -6.04  | 3.03   | -18.37 |
| 161 | Fenobucarb                     | -12.36 | -9.49  | -16.23 | -8.48  | -3.99  | 3.72   | 3.58   | -2.00  |

|     |                            |        |        |        |        |        |        |        |        |
|-----|----------------------------|--------|--------|--------|--------|--------|--------|--------|--------|
| 162 | Albendazole                | -14.81 | -17.17 | -25.79 | -29.99 | -5.08  | 5.55   | 7.07   | -4.81  |
| 163 | Azinphos-methyl            | -52.35 | -43.44 | -57.75 | -48.44 | -31.44 | -21.40 | -22.74 | -23.63 |
| 164 | Terbufos-sulfoxide         | 68.01  | 81.62  | 56.38  | 73.08  | 81.41  | 98.75  | 100.21 | 88.49  |
| 165 | Phenmedipham               | -14.33 | -9.40  | -29.79 | -16.42 | -7.32  | 1.30   | 5.19   | 4.10   |
| 166 | Terbufos sulfone           | -13.04 | -7.16  | -21.96 | -12.49 | -6.04  | 0.71   | 4.74   | 4.79   |
| 167 | Triclopyr                  | 55.70  | 48.28  | 34.89  | 29.67  | 15.75  | 22.25  | 15.46  | 15.67  |
| 168 | IodosulFuron-methyl-Sodium | 50.05  | 13.60  | 78.50  | 34.81  | 11.33  | 4.20   | 19.86  | 2.20   |
| 169 | Fentinacetate              | ND     |
| 170 | Saflufenacil               | -99.08 | ND     | ND     | ND     | -99.10 | -98.33 | -99.25 | -99.39 |
| 171 | Phosmet                    | -22.75 | -21.52 | -41.84 | -44.34 | -17.02 | -5.04  | 3.23   | -11.26 |
| 172 | Dimethenamid               | -20.53 | -16.60 | -28.76 | -25.93 | -13.63 | -6.10  | 4.13   | -11.39 |
| 173 | Pyrifitalid                | -14.88 | -4.52  | -21.73 | -12.82 | -5.32  | 1.00   | 9.50   | -5.32  |
| 174 | Cyhexatin                  | ND     |
| 175 | BensulFuron-methyl         | 44.16  | 15.59  | 49.17  | 27.48  | 13.92  | 3.28   | 11.16  | -8.13  |
| 176 | Ethofumesate               | -15.94 | -20.38 | -27.13 | -28.83 | -15.26 | -6.37  | 2.16   | -8.67  |
| 177 | Diethofencarb              | -14.57 | -15.70 | -29.07 | -24.53 | -15.42 | -5.48  | 5.56   | -7.97  |
| 178 | Fenamidone                 | 3.07   | -12.97 | -20.28 | -31.57 | -13.66 | -1.66  | 7.31   | -10.24 |
| 179 | Azoxystrobin               | -11.17 | -2.61  | -13.22 | -15.32 | -3.60  | 2.44   | 6.05   | -4.14  |
| 180 | Parathion-methyl           | ND     |
| 181 | Flucetosulfuron            | 53.85  | 16.34  | -2.18  | 58.33  | -9.48  | -1.49  | 6.62   | -14.72 |
| 182 | Flurtamone                 | -21.18 | -16.03 | -18.75 | -52.72 | -11.10 | -4.93  | -1.91  | -11.40 |
| 183 | Methiocarb                 | -16.03 | -11.66 | -14.37 | -89.24 | -6.42  | 3.06   | -10.31 | -16.54 |
| 184 | Terbuthylazine             | -21.83 | -18.10 | -26.18 | -78.00 | -14.30 | -5.28  | -5.75  | -10.80 |
| 185 | Paclobutrazol              | 6.69   | -4.05  | -7.73  | -5.50  | -8.31  | -2.40  | 1.30   | -19.17 |
| 186 | Prometryn                  | -8.91  | -17.08 | -12.90 | -51.83 | -3.45  | 7.27   | 5.87   | -7.06  |
| 187 | Ethiprole                  | 7.44   | -22.93 | -31.53 | -60.96 | -26.12 | -13.17 | 2.50   | -26.78 |
| 188 | Propanil                   | -26.57 | -33.19 | -25.87 | -30.64 | -16.09 | -8.81  | 3.16   | 32.75  |
| 189 | Boscalid                   | -12.32 | -19.66 | -27.46 | -34.55 | -16.43 | -5.75  | 5.90   | -41.07 |
| 190 | Bispyribac-sodium          | 225.93 | 126.10 | 141.74 | 150.37 | 229.02 | -2.18  | 18.61  | -0.52  |
| 191 | Fluopicolide               | -27.36 | -20.69 | -24.42 | -36.87 | -35.07 | -1.59  | 1.67   | -9.71  |
| 192 | Triadimefon                | 1.72   | -2.62  | -3.78  | -14.47 | 4.72   | 3.82   | 4.42   | -1.85  |
| 193 | Mandipropamid              | -10.63 | -4.21  | -16.30 | -22.98 | -15.55 | 3.63   | 12.10  | -3.75  |
| 194 | Molinate                   | -3.08  | -2.78  | -11.25 | -21.45 | -12.71 | 4.57   | 6.82   | 4.50   |
| 195 | Isoprothiolane             | -28.52 | -18.07 | -23.95 | -26.50 | -23.77 | 1.36   | 0.45   | -5.90  |
| 196 | Flutolanil                 | -24.20 | -19.69 | -19.88 | -36.26 | -26.98 | 1.50   | 1.67   | -7.76  |
| 197 | Malathion                  | -21.74 | -18.32 | -17.98 | -17.23 | -18.39 | 0.95   | 7.72   | -7.90  |
| 198 | Anilazine                  | -20.28 | -35.18 | -39.36 | -38.71 | -37.92 | -15.94 | -27.70 | -59.99 |
| 199 | Dimethomorph               | 9.82   | 11.32  | -32.08 | -8.21  | 15.59  | 3.15   | 8.77   | -37.44 |
| 200 | Fludioxonil                | 18.55  | 19.56  | 22.68  | 24.32  | 14.50  | 9.74   | 5.85   | 3.82   |
| 201 | Metazosulfuron             | 47.47  | 19.96  | -18.48 | -17.77 | 9.26   | -8.08  | 5.14   | -25.38 |
| 202 | Mepronil                   | -14.90 | -7.59  | -8.57  | -14.83 | -6.62  | 2.65   | 10.45  | -1.32  |
| 203 | Propyzamide                | -20.82 | -12.43 | -28.59 | -41.89 | -16.78 | 120.41 | -16.27 | -22.30 |

|     |                        |        |        |        |        |        |        |        |        |
|-----|------------------------|--------|--------|--------|--------|--------|--------|--------|--------|
| 204 | Chlorimuron-ethyl      | 102.55 | 14.39  | 2.99   | 5.89   | 5.04   | 4.54   | 13.16  | -10.61 |
| 205 | Methoxyfenozide        | -24.16 | -13.65 | -14.40 | -8.13  | -10.07 | 4.46   | 13.93  | 2.70   |
| 206 | Fluxapyroxad           | -31.66 | -19.99 | -24.73 | -27.29 | -14.41 | 1.05   | 4.10   | -5.19  |
| 207 | Fomesafen              | 165.05 | 111.13 | 98.82  | 198.54 | 96.73  | 13.34  | 13.89  | 14.51  |
| 208 | Isopropyl-N            | -7.44  | -0.97  | -15.09 | ND     | -13.86 | 0.77   | 13.84  | -32.15 |
| 209 | Myclobutanil           | 16.06  | 8.40   | 0.03   | -4.84  | 0.63   | 4.08   | 7.77   | -3.41  |
| 210 | Triflusalufuron-methyl | 23.03  | 26.78  | -26.67 | -31.30 | 11.16  | -7.08  | 4.90   | -20.90 |
| 211 | Fenhexamid             | -5.50  | -10.52 | -17.20 | -42.44 | -14.97 | -3.97  | 2.16   | -12.47 |
| 212 | Isazophos              | -14.28 | -7.64  | -9.80  | -12.47 | -10.12 | 3.18   | 4.47   | -4.87  |
| 213 | Ethoxysulfuron         | -7.03  | -20.29 | -41.68 | 7.89   | -23.21 | -17.64 | -14.99 | -38.38 |
| 214 | Pyridaphenthion        | -0.51  | -7.44  | -13.91 | -34.83 | -10.69 | -2.48  | 2.98   | -7.08  |
| 215 | Sedaxane               | -10.97 | -10.05 | -20.09 | -21.32 | -13.11 | -3.91  | -1.30  | -4.91  |
| 216 | Triadimenol            | 9.11   | 1.89   | -3.15  | -7.80  | -2.24  | 5.15   | 9.94   | -4.45  |
| 217 | Diphenylamine          | -0.57  | -7.81  | -7.81  | -2.22  | -4.23  | -2.08  | 0.50   | -8.67  |
| 218 | Acifluorfen            | 52.42  | 39.12  | 13.59  | 27.26  | 14.32  | 11.86  | 8.97   | 5.50   |
| 219 | Bifenazate             | -9.92  | -16.64 | -31.37 | -48.20 | -8.35  | 1.51   | -0.92  | -22.42 |
| 220 | Mefenacet              | -17.30 | -17.72 | -36.89 | -33.97 | -17.02 | -13.71 | -14.84 | -17.86 |
| 221 | Dichlofluanid          | -21.98 | -17.14 | -26.70 | -35.99 | -13.09 | -2.23  | -1.41  | -7.63  |
| 222 | Fluopyram              | -19.34 | -25.52 | -37.41 | -38.45 | -21.26 | -16.47 | -16.33 | -25.14 |
| 223 | Acetochlor             | -25.55 | -38.33 | -29.18 | -49.73 | -17.09 | -7.28  | -29.27 | -35.58 |
| 224 | Alachlor               | -25.55 | -38.33 | -29.18 | -49.73 | -17.09 | -7.28  | -29.27 | -35.58 |
| 225 | Flufenacet             | -17.71 | -20.91 | -20.57 | -31.17 | -14.90 | -4.80  | -1.26  | -9.67  |
| 226 | Cyproconazole          | -2.87  | -6.12  | -21.01 | -11.53 | -8.60  | -5.18  | -5.18  | -7.89  |
| 227 | Triazophos             | -11.62 | -15.31 | -16.47 | -15.99 | -12.03 | -2.94  | -1.50  | -7.72  |
| 228 | Propyrisulfuron        | -85.71 | 1.77   | -9.60  | 18.37  | -1.62  | 3.57   | 2.84   | -8.48  |
| 229 | Ethoprophos            | -14.55 | -12.70 | -14.89 | -37.47 | -9.50  | -0.93  | 2.94   | -10.51 |
| 230 | Fenarimol              | 4.89   | 0.50   | -4.59  | -5.86  | 0.30   | 2.40   | 8.28   | -4.17  |
| 231 | Spirotetramat          | 23.67  | 13.23  | -2.65  | 3.38   | -5.35  | -1.95  | 12.38  | 11.45  |
| 232 | Napropamide            | -8.85  | -8.19  | -16.22 | -11.41 | -6.39  | -1.58  | 1.80   | 31.57  |
| 233 | Tetraconazole          | -5.55  | -5.55  | -16.18 | -8.06  | -8.59  | -2.45  | 0.12   | -9.81  |
| 234 | Metolachlor            | -5.56  | -6.38  | -11.39 | -15.40 | -3.10  | 5.65   | 6.93   | -0.91  |
| 235 | Bupirimate             | -4.42  | -5.58  | -14.03 | -13.81 | -3.89  | 2.70   | 5.15   | 0.63   |
| 236 | Chlorpyrifos oxon      | ND     |
| 237 | Cyclosulfamuron        | 21.52  | 12.47  | -5.54  | 10.44  | -5.11  | -10.29 | 7.04   | -19.41 |
| 238 | Halosulfuron-methyl    | 7.22   | 10.96  | -14.30 | 9.60   | -2.52  | -3.28  | 8.97   | -15.07 |
| 239 | Uniconazole            | -3.04  | -2.16  | -13.66 | -5.73  | -6.61  | -1.54  | -2.86  | -6.61  |
| 240 | Pyrazosulfuron-ethyl   | 27.46  | 22.63  | -2.35  | 17.20  | -3.74  | -0.30  | 4.59   | -11.04 |
| 241 | Fenoxanil              | -16.25 | -15.86 | -13.17 | -30.61 | -22.61 | 3.44   | -1.42  | 6.13   |
| 242 | Fipronil-desulfinyl    | 23.83  | 16.95  | 23.35  | 22.00  | 9.45   | 17.75  | 22.35  | 11.46  |
| 243 | Fenamiphos             | 5.10   | 2.02   | -2.64  | 7.64   | -0.35  | 10.02  | 10.63  | 2.99   |
| 244 | Tebufenozide           | -21.17 | -20.76 | -20.79 | -20.31 | -19.67 | -4.11  | -10.27 | -15.85 |
| 245 | Thifluzamide           | -50.09 | -46.94 | -46.34 | -81.73 | -36.89 | -21.11 | -15.93 | -29.09 |
| 246 | Iprodione              | -62.37 | -71.51 | -55.68 | -55.68 | -57.42 | ND     | -5.36  | 1.59   |

|     |                      |        |        |        |        |        |        |        |        |
|-----|----------------------|--------|--------|--------|--------|--------|--------|--------|--------|
| 247 | Azadirachtin         | -92.12 | -83.66 | -59.42 | -10.02 | -8.49  | -5.59  | -28.54 | -56.03 |
| 248 | Fenbuconazole        | 5.54   | 0.00   | -8.63  | -2.77  | -2.92  | 4.46   | 0.35   | -19.14 |
| 249 | Flusilazole          | 84.88  | 0.46   | 87.24  | -6.57  | -0.32  | 132.48 | 7.24   | -0.82  |
| 250 | Silthiofam           | -6.54  | -7.51  | -12.11 | -15.70 | -7.97  | 2.57   | 0.90   | -9.05  |
| 251 | Cyprodinil           | -4.03  | -8.43  | -8.92  | -25.73 | -6.80  | 10.23  | 5.22   | 0.65   |
| 252 | Rotenone             | 4.36   | -2.47  | -10.77 | -5.06  | -11.01 | 1.00   | 1.65   | -1.71  |
| 253 | Epoxiconazole        | -2.23  | -3.46  | -9.76  | -8.83  | -5.63  | 2.40   | -0.33  | -4.76  |
| 254 | Iprobenfos           | -1.16  | -1.78  | -15.65 | -9.19  | -5.55  | 2.78   | 2.19   | -1.92  |
| 255 | Propisochlor         | -20.92 | -14.54 | -31.31 | -26.67 | -9.99  | 0.04   | -3.48  | -1.20  |
| 256 | Fipronil             | -58.65 | -59.88 | -57.47 | -78.58 | -53.94 | -36.24 | -38.83 | -27.61 |
| 257 | Picoxystrobin        | -12.39 | -11.49 | -16.69 | -15.48 | -12.44 | 6.35   | -2.10  | -10.81 |
| 258 | Sulfotepp            | -18.70 | -19.17 | -21.87 | -28.52 | -16.67 | -13.81 | -14.29 | -21.24 |
| 259 | Isofenphos-methyl    | -62.48 | -60.34 | -60.16 | -44.11 | -52.87 | -42.59 | -30.87 | -29.57 |
| 260 | Quizalofop FreeAcid- | -12.54 | 6.23   | -3.56  | 2.15   | -1.89  | 0.34   | -0.57  | 13.52  |
| 261 | Kresoxim-methyl      | -31.67 | -31.59 | -41.66 | -39.76 | -28.79 | -26.02 | -26.07 | -31.70 |
| 262 | Diflubenzuron        | -24.19 | -19.85 | -42.92 | -73.04 | -38.82 | 1.59   | 2.40   | -5.73  |
| 263 | Phenthoate           | -87.75 | -90.78 | -90.81 | -91.66 | -89.36 | -10.04 | -10.69 | -19.50 |
| 264 | Dodine               | -0.97  | -2.91  | -0.60  | -4.56  | 0.30   | 4.41   | 4.04   | -3.51  |
| 265 | Pyrametostrobin      | -6.85  | -3.41  | -12.66 | -16.34 | -4.49  | -4.13  | -2.72  | -5.07  |
| 266 | Parathion            | ND     |
| 267 | Fenothiocarb         | -11.37 | -12.90 | -15.37 | -16.39 | -11.12 | 1.59   | -1.14  | -6.80  |
| 268 | Quinalphos           | 1.27   | -13.29 | -13.12 | -26.82 | -16.62 | -13.63 | -9.99  | -15.39 |
| 269 | Flubendiamide        | 16.03  | -6.41  | -17.08 | -29.90 | 30.61  | 36.73  | 30.13  | 47.81  |
| 270 | Clodinafop-propargyl | 25.23  | 9.33   | 5.88   | -25.91 | 8.10   | 10.03  | 12.48  | 8.61   |
| 271 | Penconazole          | 1.69   | 7.51   | -2.37  | -19.54 | 4.27   | 6.23   | 6.34   | 7.84   |
| 272 | Tolyfluanid          | -8.26  | -8.62  | -6.55  | -54.15 | -4.31  | 3.05   | 3.95   | -2.51  |
| 273 | Fipronil-sulfide     | 17.82  | 13.40  | 15.89  | 34.22  | 11.21  | 5.13   | 8.61   | 5.53   |
| 274 | Penthiopyrad         | -6.19  | -11.19 | -5.74  | -31.72 | -5.74  | 3.28   | 4.74   | -0.91  |
| 275 | Carfentrazone-ethyl  | 1.62   | -2.71  | -2.27  | -24.79 | 0.78   | 7.01   | 11.00  | 2.63   |
| 276 | Diazinon             | -13.74 | -13.68 | -15.97 | -41.54 | -7.26  | -1.31  | 2.23   | -9.62  |
| 277 | Fonophos             | -20.89 | -19.65 | -23.54 | -20.36 | -20.42 | -22.70 | -3.67  | 1.98   |
| 278 | Benalaxyl            | -7.72  | -8.64  | -18.41 | -10.06 | -5.81  | 4.04   | 1.35   | -14.24 |
| 279 | Propiconazole        | -10.38 | -8.37  | -12.23 | -40.12 | -8.42  | -6.76  | 0.22   | -7.53  |
| 280 | Tebuconazole         | 1.48   | -1.87  | -1.63  | -1.18  | -1.42  | -6.10  | 1.90   | -3.72  |
| 281 | Edifenphos           | -10.58 | -11.34 | -17.50 | -18.99 | -5.58  | -0.93  | 1.52   | -15.06 |
| 282 | Anilofos             | -7.94  | -10.29 | -13.32 | -22.26 | -2.36  | 3.28   | 5.61   | -4.42  |
| 283 | Spinosad             | -22.27 | -15.45 | -21.08 | -26.01 | -11.96 | -2.79  | -1.89  | -14.30 |
| 284 | Benzovindiflupyr     | -6.44  | -9.21  | -11.86 | -29.37 | -7.73  | -3.44  | 1.03   | -9.32  |
| 285 | Fluthiacet-methyl    | -3.07  | -3.97  | 4.70   | -53.07 | -5.70  | -3.93  | 4.30   | -9.93  |
| 286 | Fenthion             | -15.61 | -17.90 | -24.87 | -56.08 | -4.22  | -4.14  | 0.59   | -9.90  |
| 287 | Pyrimorph            | -2.37  | -9.37  | -7.01  | -43.96 | -6.65  | 1.49   | 7.94   | -7.25  |
| 288 | Chlorbenzuron        | -23.56 | -55.42 | -47.89 | -76.15 | -21.05 | 2.91   | 4.92   | -11.85 |
| 289 | Flufiprole           | -17.90 | -29.92 | -32.76 | -62.04 | -14.58 | -1.20  | -0.97  | -14.47 |

|     |                     |        |        |        |        |        |        |        |        |
|-----|---------------------|--------|--------|--------|--------|--------|--------|--------|--------|
| 290 | Prochloraz          | -6.38  | -12.55 | -8.49  | -22.25 | -9.81  | 1.72   | 2.25   | -8.11  |
| 291 | Pyraflufen-ethyl    | -15.67 | -36.05 | -31.86 | -38.63 | -14.14 | -30.29 | -0.74  | -33.48 |
| 292 | Famoxadone          | -54.63 | -49.67 | -47.60 | -60.26 | -44.13 | -26.82 | -15.62 | -34.21 |
| 293 | Fipronil-sulfone    | -48.44 | -66.53 | -56.72 | -75.73 | -52.61 | -34.66 | -28.70 | -40.99 |
| 294 | Zoxamide            | -22.51 | -26.79 | -20.92 | -33.66 | -14.82 | -1.20  | 0.57   | -7.14  |
| 295 | Hexaconazole        | -1.16  | -8.21  | -2.38  | -8.10  | -3.22  | 6.99   | 5.93   | -3.05  |
| 296 | Pinoxaden           | -12.00 | -4.58  | -11.92 | 0.10   | -7.58  | 9.32   | 13.20  | -3.02  |
| 297 | Pirimiphos-methyl   | -17.48 | -14.70 | -15.51 | -23.10 | -13.21 | 6.64   | 5.01   | -4.88  |
| 298 | Phoxim              | -28.74 | -14.42 | -16.14 | -20.20 | -30.02 | -0.99  | -3.94  | -10.80 |
| 299 | Endosulfan sulfate  | 152.45 | 67.33  | 71.04  | 98.26  | 52.93  | 16.38  | 23.73  | 19.30  |
| 300 | Phorate             | -20.36 | -6.88  | -9.93  | -8.86  | 10.41  | 10.95  | 5.66   | -6.09  |
| 301 | Prothioconazole     | 21.06  | 20.97  | -4.62  | 43.88  | 12.70  | 71.74  | 59.74  | 24.11  |
| 302 | Coumaphos           | -12.37 | -10.86 | -11.69 | -17.36 | -40.05 | 9.24   | 19.32  | -6.92  |
| 303 | Phosalone           | -46.54 | -26.28 | -25.28 | -29.26 | -36.18 | -4.17  | -4.10  | -11.64 |
| 304 | Thiobencarb         | -22.77 | -11.31 | -6.20  | -22.39 | -30.86 | 14.99  | 2.68   | -4.10  |
| 305 | Oxadiazyl           | -4.54  | -7.46  | -16.23 | -13.14 | -10.10 | 6.99   | 19.01  | -2.63  |
| 306 | Bitertanol          | -24.35 | -32.45 | -29.91 | -22.05 | -28.23 | -10.95 | 4.18   | -23.26 |
| 307 | Pyraclostrobin      | -6.72  | -7.90  | -13.58 | -19.65 | -10.46 | 2.76   | 2.89   | -9.49  |
| 308 | Tolclofos-methyl    | -12.44 | -0.87  | -11.32 | -17.91 | -5.76  | 3.75   | -7.68  | -9.01  |
| 309 | Benzoximate         | -43.13 | -41.85 | -40.97 | -15.28 | -38.87 | -19.28 | -21.08 | -28.77 |
| 310 | Diniconazole        | -6.00  | -9.90  | -11.42 | -18.18 | -7.58  | -1.24  | -5.33  | -9.20  |
| 311 | Spinetoram          | -19.64 | -14.91 | -21.50 | -20.71 | -18.77 | -7.83  | -3.73  | -16.69 |
| 312 | Triflumuron         | -56.63 | -57.72 | -62.53 | -86.88 | -40.82 | -36.17 | -33.80 | -41.31 |
| 313 | Cadusafos           | -12.22 | -14.89 | -14.82 | -34.66 | -13.85 | 0.46   | 1.50   | -5.20  |
| 314 | Disulfoton          | -80.84 | -47.12 | -53.72 | ND     | -40.93 | -18.10 | -16.41 | -29.90 |
| 315 | Pyraoxystrobin      | -15.19 | -15.79 | -22.57 | -42.43 | -17.86 | -3.36  | -5.29  | -4.96  |
| 316 | Metrafenone         | -17.20 | -24.28 | -24.17 | -63.14 | -20.04 | -7.43  | -6.22  | -14.10 |
| 317 | Dimepiperate        | -13.38 | -18.47 | -22.45 | -49.82 | -18.47 | 5.68   | 2.02   | -9.33  |
| 318 | Clofentezine        | -11.28 | -19.29 | -29.17 | -50.42 | -16.37 | -2.20  | 7.79   | -11.39 |
| 319 | Bifenox             | -61.23 | -51.03 | -60.85 | -77.31 | -52.78 | -8.56  | -33.32 | -39.29 |
| 320 | Isopyrazam          | -5.34  | -7.84  | -9.99  | -19.27 | -6.89  | 2.33   | 5.43   | -3.19  |
| 321 | Chlorpyrifos-methyl | -6.86  | -5.68  | -10.20 | 14.01  | -0.14  | -4.09  | 10.57  | -2.58  |
| 322 | Dufulin             | -0.29  | -4.30  | -4.84  | -14.97 | -1.67  | 4.38   | 6.63   | -2.63  |
| 323 | Difenoconazole      | -21.86 | -22.52 | -28.45 | -28.64 | -24.03 | -13.10 | 4.69   | -12.33 |
| 324 | Haloxypop-methyl    | -15.78 | -15.19 | -15.64 | -37.04 | -14.13 | -3.15  | -3.12  | -9.16  |
| 325 | Pretilachlor        | -16.87 | -13.07 | -16.05 | -29.05 | -17.92 | -0.99  | -5.29  | -8.93  |
| 326 | Pyrethrin II        | -45.41 | -35.05 | -57.96 | -91.75 | -84.53 | -23.75 | -5.42  | -30.10 |
| 327 | Triflumizole        | -22.61 | -14.11 | -21.62 | -28.10 | -20.54 | 5.94   | -7.89  | -12.12 |
| 328 | Ametoctradin        | -14.78 | -7.16  | -18.68 | -25.78 | -17.90 | -4.62  | -6.64  | -12.76 |
| 329 | Trifloxystrobin     | -21.05 | -11.99 | -21.88 | -27.78 | -21.13 | -1.46  | -5.95  | -9.19  |
| 330 | Indoxacarb          | -28.71 | -25.11 | -33.35 | -34.92 | -18.82 | -11.30 | -14.13 | -20.26 |
| 331 | Diflufenican        | -15.61 | -22.49 | -17.87 | -24.79 | -8.36  | -2.95  | -1.15  | -3.05  |
| 332 | Clethodim           | 0.44   | 8.85   | 4.00   | 26.82  | 19.88  | 29.28  | 28.94  | 18.79  |

|     |                     |        |        |        |        |        |        |        |        |
|-----|---------------------|--------|--------|--------|--------|--------|--------|--------|--------|
| 333 | Cycloxydim          | -22.76 | -11.66 | -10.70 | 16.91  | 4.26   | 8.12   | 6.29   | -3.78  |
| 334 | Fluoroglyphen-ethyl | -7.97  | -32.98 | -41.48 | -42.90 | -26.56 | 4.24   | 0.08   | -6.96  |
| 335 | Chlorfenapyr        | ND     |
| 336 | Iaconazole          | -3.39  | -4.51  | -14.80 | -3.80  | -3.36  | -4.16  | 4.35   | -3.64  |
| 337 | Benfuracarb         | -58.30 | -61.60 | -61.60 | -73.02 | -61.15 | -48.88 | -34.68 | -78.37 |
| 338 | Fenaminstrobin      | -10.68 | -9.05  | -14.13 | -21.42 | -12.18 | -13.83 | -5.61  | -8.89  |
| 339 | Cyflumetofen        | -21.57 | -18.50 | -24.48 | -31.12 | -19.62 | 7.72   | -5.60  | -11.15 |
| 340 | Profenophos         | -20.37 | -18.60 | -22.98 | -29.38 | -17.78 | 9.75   | -9.29  | -11.82 |
| 341 | Emamectin B1A       | -15.55 | -5.31  | -17.59 | -10.04 | -4.61  | -4.29  | -11.26 | -6.65  |
| 342 | Oxaziclomefone      | -11.81 | -14.13 | -14.52 | -16.32 | -11.75 | -14.97 | -4.83  | -7.52  |
| 343 | Buprofezin          | -30.18 | -17.64 | -35.79 | -32.56 | -14.07 | -5.10  | -35.17 | -7.66  |
| 344 | Fluazifop-butyl     | -24.36 | -19.26 | -30.27 | -49.43 | -17.85 | -14.00 | -33.26 | -15.09 |
| 345 | Hexaflumuron        | -87.76 | -78.87 | -86.70 | -88.63 | -67.90 | -42.76 | -64.81 | -61.85 |
| 346 | Fenoxaprop-ethyl    | -18.52 | -15.55 | -20.52 | -31.47 | -10.39 | -0.96  | -35.54 | -8.73  |
| 347 | Quizalofop-ethyl    | -20.74 | -15.38 | -24.77 | -34.12 | -12.81 | -1.59  | -36.97 | -10.01 |
| 348 | Terbufos            | -33.71 | -29.51 | -35.00 | -57.09 | -27.88 | 2.19   | -45.52 | -15.25 |
| 349 | Butachlor           | 14.03  | 3.81   | -1.74  | -10.35 | 4.41   | 17.02  | -23.17 | 4.20   |
| 350 | Amisulbrom          | -95.59 | -61.45 | ND     | ND     | -64.22 | -60.39 | -45.38 | -40.77 |
| 351 | Novaluron           | 29.97  | 34.08  | 47.30  | 54.19  | 13.42  | 19.20  | -22.92 | 10.91  |
| 352 | Sethoxydim          | -9.87  | -1.89  | -1.83  | -13.26 | 0.20   | 12.09  | -26.64 | 0.06   |
| 353 | Metamifop           | -4.82  | -6.37  | -21.44 | -33.84 | -9.99  | 4.58   | -35.18 | -7.85  |
| 354 | Diclofop-methyl     | -47.50 | -52.92 | -61.60 | ND     | -50.01 | -38.10 | -59.66 | -42.55 |
| 355 | Flumiclorac-pentyl  | -13.12 | -15.30 | -22.89 | -57.56 | -16.82 | -8.68  | -39.23 | -16.33 |
| 356 | Lactofen            | -28.67 | -24.95 | -31.64 | -76.56 | -35.12 | -18.18 | -41.70 | -11.29 |
| 357 | Enestroburin        | -16.00 | -13.64 | -17.88 | -40.35 | -19.37 | -1.71  | -32.71 | -13.45 |
| 358 | Piperonyl butoxide  | -8.05  | -7.55  | -8.88  | -29.17 | -8.80  | 3.90   | -22.66 | -6.31  |
| 359 | Oxadiazon           | -31.68 | -26.53 | -36.61 | -49.31 | -21.39 | -12.26 | -38.83 | -16.82 |
| 360 | Pyribenzoxim        | -6.46  | -2.57  | -15.52 | 39.85  | -14.55 | 0.71   | -26.80 | -13.45 |
| 361 | Fluazinam           | 17.53  | 14.68  | 14.74  | 9.11   | 10.19  | 7.84   | -4.45  | 14.06  |
| 362 | Tolfenpyrad         | -29.73 | -31.85 | -32.76 | -21.35 | -22.23 | -15.74 | -32.98 | -12.08 |
| 363 | Metaflumizone       | -50.64 | -41.58 | -46.04 | -52.33 | -34.96 | -21.39 | -59.00 | -34.57 |
| 364 | Azocyclotin         | ND     |
| 365 | Ethion              | -33.95 | -16.36 | -26.12 | -24.45 | -16.11 | -2.65  | -43.44 | -9.38  |
| 366 | Hexythiazox         | -75.72 | -75.59 | -71.82 | -70.69 | -45.46 | -24.73 | -69.28 | -27.00 |
| 367 | Pyriproxyfen        | -44.12 | -31.87 | -28.76 | -31.08 | -22.27 | -3.01  | -48.36 | -15.09 |
| 368 | Coumoxystrobin      | -21.21 | -29.77 | -19.43 | -20.18 | -16.59 | 0.50   | -36.81 | -10.07 |
| 369 | Tralkoxydim         | 10.79  | 11.08  | 8.85   | 15.79  | 13.43  | 16.02  | -11.96 | 15.40  |
| 370 | ChlorpyriFos        | -28.04 | -15.20 | -29.84 | -41.92 | -26.16 | -11.10 | -51.60 | -14.02 |
| 371 | Quinoxifen          | -26.40 | -25.77 | -27.19 | -53.22 | -24.86 | -3.91  | -42.32 | -14.33 |
| 372 | Teflubenzuron       | -68.05 | -61.72 | -74.91 | -88.04 | -62.92 | -47.25 | -57.47 | -59.10 |
| 373 | Pendimethalin       | 17.41  | 9.48   | 7.33   | -12.64 | 12.22  | 16.04  | -19.44 | 12.88  |
| 374 | Propargite          | -23.33 | -29.48 | -27.59 | -37.77 | -26.64 | -10.01 | -32.98 | -16.40 |
| 375 | Flucythrinate       | -18.43 | -30.65 | -35.24 | -16.62 | -25.64 | -10.16 | -27.35 | -20.78 |

|     |                 |        |        |        |        |        |        |        |        |
|-----|-----------------|--------|--------|--------|--------|--------|--------|--------|--------|
| 376 | Lufenuron       | -74.46 | -74.67 | -81.35 | -79.60 | -60.67 | -71.51 | -64.85 | -58.02 |
| 377 | Pyrethrin 1     | -35.12 | -26.93 | -34.50 | -90.22 | -85.10 | -23.99 | -28.68 | -19.29 |
| 378 | Butralin        | 2.26   | 2.65   | -15.88 | -10.75 | -2.48  | 4.03   | -17.08 | 4.17   |
| 379 | Etoxazole       | -15.07 | -6.75  | -14.32 | -15.83 | -7.62  | -3.67  | -23.01 | -5.78  |
| 380 | Fenpropathrin   | -40.03 | -11.06 | -43.23 | -45.46 | -34.77 | -45.23 | -31.40 | -20.07 |
| 381 | Flumetrain      | -62.35 | -50.31 | -23.52 | ND     | -7.92  | 15.29  | 28.53  | -22.43 |
| 382 | Diafenthiuron   | -89.36 | -87.13 | ND     | -99.39 | -99.31 | -99.30 | -33.65 | -90.22 |
| 383 | Cyhalothrin     | -35.87 | 18.12  | -49.47 | -55.86 | -39.88 | -13.81 | 28.92  | -32.33 |
| 384 | Fenbutatinoxide | ND     |
| 385 | Spirodiclofen   | -30.47 | -36.81 | -41.18 | -51.14 | -34.43 | -29.47 | -3.64  | -29.93 |
| 386 | Flufenoxuron    | -6.87  | -77.68 | -36.37 | -49.54 | -10.96 | -6.73  | 46.63  | -4.57  |
| 387 | Fenpyroximate   | 56.67  | 43.66  | 31.28  | 45.06  | 47.95  | 48.48  | 48.48  | 38.99  |
| 388 | Cypermethrin    | -14.54 | -15.48 | -4.22  | 3.08   | -9.45  | 65.15  | 96.18  | 41.29  |
| 389 | Amitraz         | -97.69 | ND     |
| 390 | Deltamethrin    | -57.15 | -73.32 | -84.63 | -83.12 | -52.69 | -46.23 | -31.12 | -51.90 |
| 391 | Chlorfluazuron  | 145.07 | 30.39  | 14.35  | 10.14  | 101.06 | 58.49  | 101.79 | 41.51  |
| 392 | Pyridaben       | 24.48  | 16.02  | 13.94  | 13.24  | 29.52  | 40.75  | 52.90  | 31.68  |
| 393 | Fenazaquin      | 56.94  | 42.15  | 37.83  | 30.25  | 43.97  | 66.79  | 68.01  | 48.14  |
| 394 | Fenvalerate     | 35.01  | -14.50 | -18.79 | -47.87 | 7.19   | 10.03  | 21.15  | -0.83  |
| 395 | Dinoca          | ND     | ND     | ND     | ND     | ND     | -23.26 | ND     | ND     |
| 396 | Tau-fluvalinate | -47.13 | -67.50 | -57.18 | -71.60 | -59.04 | -42.60 | 1.91   | -56.54 |
| 397 | Carbosulfan     | -49.89 | -66.78 | ND     | -86.15 | -72.13 | -46.59 | -21.73 | -76.68 |
| 398 | Avermectins     | 184.52 | 87.11  | 212.89 | 45.29  | 136.85 | -11.79 | 265.48 | 161.66 |
| 399 | Bifenthrin      | -13.34 | -9.86  | -19.69 | -41.08 | -13.59 | 20.90  | 15.79  | 0.62   |
| 400 | Ethofenprox     | 10.57  | 10.37  | 5.26   | -1.99  | 13.06  | 42.68  | 39.05  | 38.69  |
| 401 | Pyridalyl       | -40.76 | -51.15 | -58.95 | -58.61 | -47.78 | -14.43 | -38.19 | -19.32 |
| 402 | Sulfluramid     | 70.31  | 70.12  | 57.81  | 67.05  | 68.26  | 42.16  | 37.61  | 49.52  |
| 403 | Triallate       | -26.74 | -25.58 | -31.34 | -33.17 | -17.72 | -8.77  | -38.28 | -8.81  |



Table S8 Applications of high-throughput screening technology in pesticide residue detection.

| Matrix                                                                                      | Compound | Analytical method   | Preparation method                                                    | Recovery (%)              | LOQ ( $\mu\text{g}/\text{kg}$ ) | References |
|---------------------------------------------------------------------------------------------|----------|---------------------|-----------------------------------------------------------------------|---------------------------|---------------------------------|------------|
| Banana, watermelon, pear and strawberry                                                     | 191      | GC-Q-Orbitrap MS    | QuEChERS                                                              | 70~120                    | 5                               | [1]        |
| Tropical fruits and vegetables                                                              | 201      | UHPLC-Q-Exactive MS | QuEChERS                                                              | 70~120                    | 0.01 (92% pesticides)           | [2]        |
| Coffee, potato corn, chili pepper                                                           | 322      | GC-MS/MS            | QuEChERS                                                              | 60~120                    | $\leq 0.01$                     | [3]        |
| Green tea                                                                                   | 479      | LC-Q-TOF MS         | Optimized solid-phase extraction                                      | 70~120 (92.7% pesticides) | 5~55                            | [4]        |
| Cottonseed hull                                                                             | 237      | GC/LC-Q-TOF MS      | QuEChERS                                                              | 70~120 (91.6% pesticides) | 0.2~20                          | [5]        |
| Fruits and vegetables                                                                       | 318      | HPLC-Q-TOF MS       | 1.5 g NaCl, 4 g MgSO <sub>4</sub> , solid-phase extraction            | /                         | /                               | [6]        |
| Apple, grape, watermelon, Grapefruit, spinach, tomato                                       | 733      | GC/LC-Q-TOF MS      | QuEChERS                                                              | 82.9~100.7                | /                               | [7]        |
| cabbage, celery                                                                             |          |                     |                                                                       |                           |                                 |            |
| Orange, kiwi, banana, garlic, cowpea, bean sprouts, sweet pepper, celery, leeks and lettuce | 420      | UPLC-Q-TOF MS       | 1.5 g NaCl, 4 g MgSO <sub>4</sub> and SinChERS-Nano purification tube | 70.1~119.7                | 0.1~5.0                         | [8]        |
| Pear, watermelon, apple, chinese cabbage, carrot, cucumber, asparagus bean and ginger       | 403      | UHPLC-Q-Exactive MS | QuEChERS                                                              | 82.4~105.1                | /                               | This work  |

Notes: “/” refers to not mentioned. “LOQ” is abbreviation of limit of quantitation.

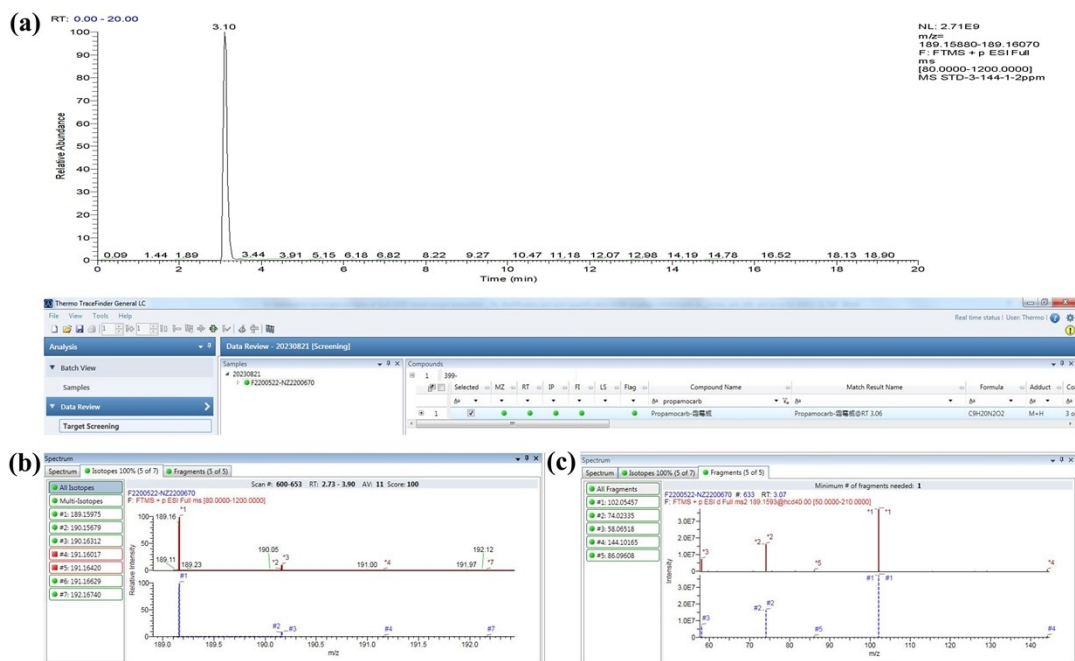

**Fig. S1.** Example of fast screening and identification of propamocarb  $[M+H]^+$  ( $m/z$  189.15975;  $t_R$  = 3.10 min) in solvent at  $2 \text{ mg L}^{-1}$  using Thermo Xcalibur software. The identification of propamocarb in sample was defined on the basis of  $t_R$  variation, accurate mass measurement, fragment ions, and isotope peak. (a) Extracted ion chromatogram of propamocarb; (b) Experimental isotopic pattern (in blue) against a theoretical pattern based on the elemental composition and adduct (in red); (c) Product ion spectrum (in blue) matched against the pesticides of in-house database using solvent (in red).

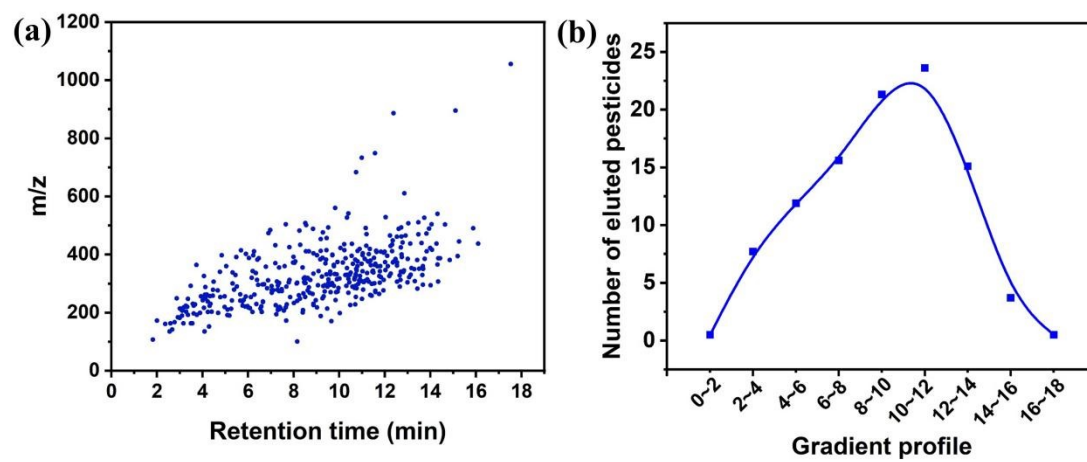

**Fig. S2.** (a) Retention time distribution of 403 pesticides in a single LC running time; (b) plot of gradient range with the percentage of eluted pesticides.

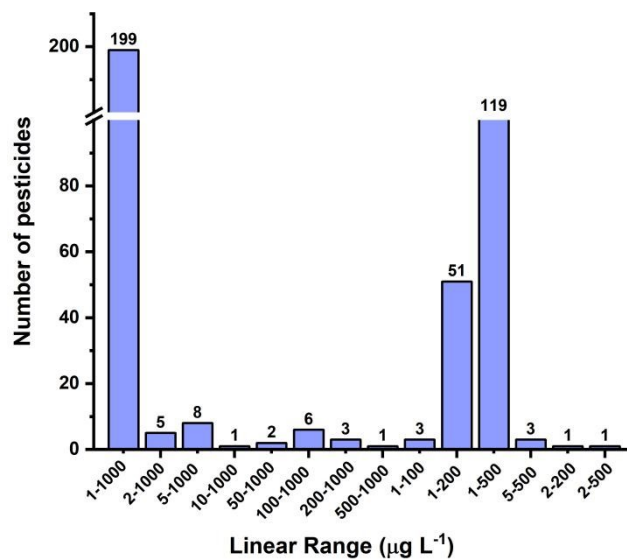

**Fig. S3.** Distribution of 403 pesticides in different linearity ranges of concentration for UHPLC-Q Exactive HRMS.

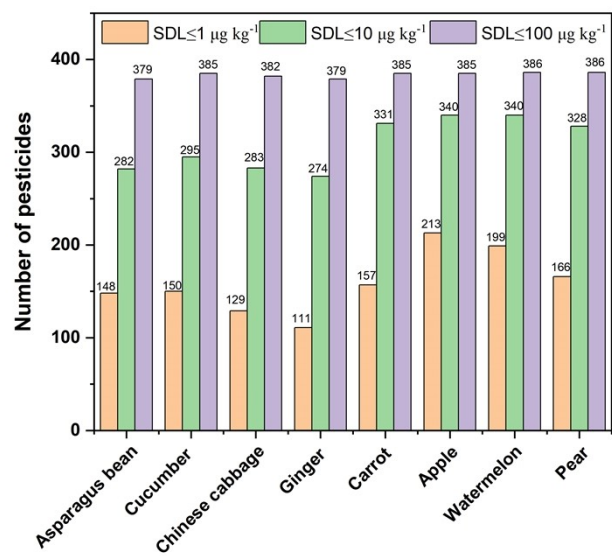

**Fig. S4.** Screening capability of UHPLC-Q Exactive HRMS For 403 pesticides in eight matrices when SDLs are no higher than 1, 10 and 100 µg kg<sup>-1</sup>.

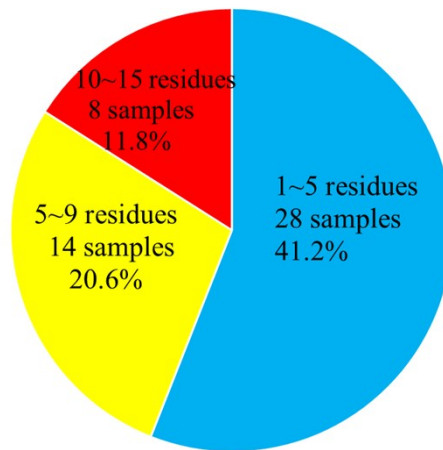

**Fig. S5.** The number of detectable pesticides residues in fruits and vegetables.
